# Supplementary material
Source: MDPI journal article supplement (https://www.mdpi.com/2073-4344/11/3/303)
Supplement: s1 [file s1]

## Sheet: TEMP
	Free RoL
Temp	20	30	40	50	60	70
Control	0.018	0.019	0.033	0.025	0.026	0.029
	0.018	0.019	0.03	0.025	0.024	0.028
Average	0.018	0.019	0.0315	0.025	0.025	0.0285
Lipase D2	1.195	1.744	1.708	2.171	0.694	0.321
	1.095	1.293	1.913	1.897	0.701	0.403
	1.354	1.203	1.8	2.306	0.825	0.42
Average	1.21467	1.41333	1.807	2.12467	0.74	0.381333
U/ml	49.6624	58.8326	74.9156	88.5935	30.1688	14.8875
	45.443	53.7553	79.3882	78.9873	28.5232	15.8017
	56.3713	49.9578	74.6203	96.2447	33.7553	16.519
Average	50.4923	54.1819	76.308	87.9419	30.8158	15.7361
%	57.4155	61.611	86.771	100	35.041	17.8937
stdev	5.51119	4.45277	2.67159	8.64713	2.67536	0.81773
stderror	3.18189	2.57081	1.54244	4.99242	1.54462	0.472117
	No additives						Hen Egg Albumin						Sodium Caseinate						CAVAMAX® W6
Control	0.006	0.007	0.01	0.01	0.008	0.012	0.052	0.054		0.071	0.052	0.062	0.138	0.146	0.131	0.103	0.076	0.096	0.036	0.028	0.036	0.036	0.034	0.076
	0.019	0.014	0.013	0.009	0.009	0.019	0.061	0.055	0.082	0.064	0.062	0.059	0.094	0.146	0.14	0.084	0.093	0.089	0.043	0.039	0.041	0.046	0.034	0.076
Average	0.0125	0.0105	0.0115	0.0095	0.0085	0.0155	0.0565	0.0545	0.082	0.0675	0.057	0.0605	0.116	0.146	0.1355	0.0935	0.0845	0.0925	0.0395	0.0335	0.0385	0.041	0.034	0.076
Accurel MP1008
A715	0.407	0.615	0.534	0.736	0.341	0.188	0.099	0.094	0.231	0.296	0.163	0.118	0.512	0.538	0.662	0.843	0.259	0.092	0.531	0.72	0.763	1.117	0.637	0.25
	0.488	0.55	0.596	0.797	0.371	0.188	0.097	0.109	0.296	0.281	0.121	0.113	0.479	0.518	0.65	0.822	0.276	0.114	0.593	0.666	0.815	1.03	0.599	0.215
	0.4475	0.5825	0.565	0.7665	0.356	0.188	0.097	0.102	0.264	0.289	0.142	0.116	0.4955	0.528	0.6285	0.8325	0.28	0.103	0.562	0.693	0.789	1.0735	0.618	0.2325
U/g	60.2382	92.3042	79.7832	110.933	50.7711	26.3399	6.48954	6.03146	22.7516	34.8908	16.1857	8.77997	167.089	165.401	222.152	316.245	73.6287	-0.21097	207.384	289.662	305.696	454.008	254.43	73.4177
	72.6065	82.379	89.2503	120.247	55.352	26.3399	6.18415	8.32188	32.6767	32.6004	9.77248	8.01649	153.165	156.962	217.089	307.384	80.8017	9.07173	233.544	266.878	327.637	417.3	238.397	58.6498
	66.4224	87.3416	84.5167	115.59	53.0615	26.3399	6.18415	7.25302	27.7905	33.822	12.9791	8.47458	160.127	161.181	208.017	311.814	82.4895	4.43038	220.464	278.27	316.667	435.654	246.414	66.0338
mean	66.4224	87.3416	84.5167	115.59	53.0615	26.3399	6.28595	7.20212	27.7396	33.7711	12.9791	8.42368	160.127	161.181	215.752	311.814	78.9733	4.43038	220.464	278.27	316.667	435.654	246.414	66.0338
%	57.4637	75.5614	73.1176	100	45.9049	22.7873	18.6134	21.3263	82.1402	100	38.4326	24.9435	51.3532	51.6915	69.1926	100	25.327	1.42084	50.6053	63.8741	72.6877	100	56.5617	15.1574
stdev	6.18415	4.96259	4.73355	4.6572	2.29043	0	0.176317	1.14606	4.96279	1.14606	3.2066	0.384274	6.96203	4.21941	7.16161	4.43038	4.70485	4.64135	13.0802	11.3924	10.9705	18.3544	8.01688	7.38397
stderror	3.57042	2.86515	2.73291	2.68884	1.32238	0	0.101797	0.661679	2.86527	0.661679	1.85133	0.221861	4.01953	2.43608	4.13476	2.55788	2.71634	2.67968	7.55184	6.57741	6.3338	10.5969	4.62855	4.26313

## Sheet: PH
	50 mM Sodium Citrate			50 mM Potassium Phosphate			50 mM Tris HCl
pH	4	5	6	6	7	8	8	9
Control	0.059	0.068	0.051	0.092	0.025	0.023	0.033	0.029
Average	0.059	0.068	0.051	0.092	0.025	0.023	0.033	0.029
A715	1.714	1.945	1.669	2.252	0.606	0.077	0.328	0.115
	1.71	1.93	1.663	2.327	0.751	0.083	0.292	0.099
	1.735	2.137	1.552	2.302	0.579	0.06	0.479	0.103
U/ml	90.4372	102.568	88.4153	118.033	24.5148	2.27848	12.4473	3.62869
	90.2186	101.749	88.0874	122.131	30.6329	2.53165	10.9283	2.95359
	91.5847	113.06	82.0219	120.765	23.3755	1.56118	18.8186	3.12236
mean	90.7468	105.792	86.1749	120.31	26.1744	2.12377	14.0647	3.23488
%	75.4277	87.9334	71.6276	100	21.7559	1.76525	11.6904	2.6888
stdev	0.733816	6.30739	3.60034	2.08678	3.90297	0.50339	4.18644	0.351336
stderror	0.423669	3.64158	2.07866	1.2048	2.25338	0.290633	2.41704	0.202844
	No Additives								Hen Egg Albumin								Sodium Caseinate								CAVAMAX® W6
	50 mM Sodium Citrate			50 mM Potassium Phosphate			50 mM Tris HCl		50 mM Sodium Citrate			50 mM Potassium Phosphate			50 mM Tris HCl		50 mM Sodium Citrate			50 mM Potassium Phosphate			50 mM Tris HCl		50 mM Sodium Citrate			50 mM Potassium Phosphate			50 mM Tris HCl
pH	4	5	6	6	7	8	8	9	4	5	6	6	7	8	8	9	4	5	6	6	7	8	8	9	4	5	6	6	7	8	8	9
Control	0.047	0.059	0.051	0.054	0.07	0.023	0.069	0.065	0.074	0.062	0.074	0.075	0.067	0.077	0.05	0.057	0.091	0.108	0.108	0.082	0.109	0.088	0.081	0.088	0.019	0.013	0.021	0.022	0.021	0.019	0.022	0.021
	0.044	0.06		0.066	0.058		0.069	0.066	0.067	0.084	0.069	0.072	0.073	0.07	0.055	0.056	0.091	0.111	0.109	0.079	0.104	0.108	0.087	0.087	0.027	0.018	0.021	0.025	0.017	0.019	0.024	0.023
Average	0.0455	0.0595	0.051	0.06	0.064	0.023	0.069	0.0655	0.0705	0.073	0.0715	0.0735	0.07	0.0735	0.0525	0.0565	0.091	0.1095	0.1085	0.0805	0.1065	0.098	0.084	0.0875	0.023	0.0155	0.021	0.0235	0.019	0.019	0.023	0.022
A715	0.75	1.04	0.965	1.219	0.784	0.39	0.8	0.637	0.216	0.372	0.526	0.582	0.331	0.189	0.498	0.385	1.371	1.601	1.586	1.731	1.255	0.709	1.025	0.584	0.944	0.962	1.108	1.118	0.863	0.656	1.022	0.527
	0.749	1.053	0.957	1.192	0.807	0.368	0.73	0.613	0.286	0.38	0.53	0.662	0.348	0.195	0.391	0.386	1.349	1.598	1.588	1.706	1.283	0.721	1.047	0.575	0.917	0.988	1.115	1.132	0.853	0.636	1.04	0.53
	0.656	1.059	0.96	1.219	0.989	0.34	0.745	0.626	0.284	0.429	0.547	0.633	0.347	0.168	0.494	0.342	1.426	1.59	1.584	1.737	1.325	0.619	1.133	0.531	0.962	0.976	1.1	1.13	0.864	0.618	1.035	0.524
U/g	107.722	149.924	139.755	177.217	110.092	56.1162	111.774	87.3853	22.2477	45.7187	69.4954	77.7523	39.9083	17.6606	68.1193	50.2294	540.084	629.325	623.418	696.414	484.599	257.806	397.046	209.494	388.608	399.367	458.65	461.814	356.118	268.776	421.519	213.08
	107.569	151.911	138.532	173.089	113.609	52.7523	101.07	83.7156	32.9511	46.9419	70.107	89.9847	42.5076	18.578	51.7584	50.3823	530.802	628.059	624.262	685.865	496.414	262.869	406.329	205.696	377.215	410.338	461.603	467.722	351.899	260.338	429.114	214.346
	93.3486	152.829	138.991	177.217	141.437	48.4709	103.364	85.7034	32.6453	54.4343	72.7064	85.5505	42.3547	14.4495	67.5076	43.6544	563.291	624.684	622.574	698.945	514.135	219.831	442.616	187.131	396.203	405.274	455.274	466.878	356.54	252.743	427.004	211.814
mean	102.88	151.555	139.093	175.841	121.713	52.4465	105.403	85.6014	29.2813	49.0316	70.7696	84.4292	41.5902	16.896	62.4618	48.0887	544.726	627.356	623.418	693.741	498.383	246.835	415.331	200.774	387.342	404.993	458.509	465.471	354.852	260.619	425.879	213.08
%	58.5072	86.1884	79.1014	100	69.2174	29.8261	59.942	48.6812	34.6816	58.0743	83.8213	100	49.2605	20.0121	73.9813	56.9574	78.52	90.4308	89.8632	100	71.8398	35.5803	59.8682	28.9407	83.215	87.0071	98.5043	100	76.2351	55.9903	91.4942	45.7773
stdev	8.25452	1.4851	0.617959	2.38356	2.48677	3.83179	5.63541	1.83698	6.09323	4.71864	1.70497	6.19282	1.45862	2.16781	9.27443	3.84093	6.56386	0.895072	0.843882	6.93748	8.354	3.58029	6.56386	11.9666	9.55675	5.49064	2.0885	3.19489	2.56657	8.02058	3.9205	1.26582
stderror	4.76575	0.857421	0.356779	1.37615	1.75841	2.21229	3.2536	1.06058	3.51793	2.72431	0.984363	3.57543	0.842136	1.25158	5.35459	2.21756	3.78965	0.632911	0.487215	4.00535	4.82319	2.06708	3.78965	6.9089	5.51759	3.17002	1.47679	1.84457	1.48181	4.63068	2.2635	0.730823

## Sheet: STABILITY
	Free RoL
Temp	0	1	2	3	4	5	6
Control	0.005	0.005	0.005	0.005	0.005	0.005	0.005
	0.007	0.007	0.007	0.007	0.007	0.007	0.007
Average	0.006	0.006	0.006	0.006	0.006	0.006	0.006
Free lipase	1.439	0.82	0.673	0.156	0.12	0.097	0.07
	1.497	0.907	0.659	0.154	0.121	0.092	0.081
	1.249	0.876	0.687	0.186	0.12	0.118	0.118
Average	1.395	0.867667	0.673	0.165333	0.120333	0.102333	0.0896667
U/ml	58.6076	36.3572	28.1435	6.72293	4.82419	4.0647	3.53024
%	100	62.035	48.0202	11.4711	8.23134	6.93545	6.02352
stdev	0.129723	0.0440946	0.014	0.0179258	0.00057735	0.0137961	0.0251462
stderror	0.0748955	0.025458	0.0080829	0.0103494	0.000333333	0.0079652	0.0145182
	No Additives							Hen Egg Albumin							Sodium Caseinate							CAVAMAX® W6
Time	0	1	2	3	4	5	6	0	1	2	3	4	5	6	0	1	2	3	4	5	6	0	1	2	3	4	5	6
Control	0.073	0.073	0.073	0.073	0.06	0.06	0.06	0.06	0.06	0.06	0.06	0.06	0.06	0.06	0.015	0.015	0.015	0.015	0.015	0.015	0.015	0.015	0.015	0.015	0.015	0.015	0.015	0.015
	0.075	0.075	0.075	0.075	0.059	0.059	0.059	0.059	0.059	0.059	0.059	0.059	0.059	0.059	0.018	0.018	0.018	0.018	0.018	0.018	0.018	0.018	0.018	0.018	0.018	0.018	0.018	0.018
Average	0.074	0.074	0.074	0.074	0.0595	0.0595	0.0595	0.0595	0.0595	0.0595	0.0595	0.0595	0.0595	0.0595	0.0165	0.0165	0.0165	0.0165	0.0165	0.0165	0.0165	0	0.0165	0.0165	0.0165	0.0165	0.0165	0.0165
A715	1.805	1.239	0.959	0.935	0.817	0.785	0.698	0.38	0.292	0.255	0.19	0.175	0.178	0.17	1.969	1.616	1.563	1.303	1.126	0.989	0.862	1.599	1.213	1.099	0.957	0.874	0.854	0.783
	1.826	1.219	0.959	0.934	0.815	0.795	0.598	0.387	0.292	0.252	0.189	0.178	0.174	0.165	1.989	1.615	1.565	1.298	1.152	0.978	0.858	1.616	1.216	1.094	0.973	0.872	0.864	0.776
	1.841	1.216	0.958	0.939	0.746	0.728	0.605	0.358	0.267	0.183	0.186	0.172	0.178	0.16	1.982	1.618	1.564	1.298	1.033	0.944	0.852	1.621	1.219	1.09	0.904	0.89	0.907	0.774
U/g	264.315	177.89	135.135	131.47	115.667	110.78	97.4958	48.9388	35.5016	29.8519	19.9267	17.6363	18.0944	16.8728	823.84	674.895	652.532	542.827	468.143	410.338	356.751	674.684	504.852	456.751	396.835	361.814	353.376	323.418
	267.522	174.836	135.135	131.318	115.361	112.307	82.2263	50.0076	35.5016	29.3938	19.774	18.0944	17.4836	16.1093	832.278	674.473	653.376	540.717	479.114	405.696	355.063	681.857	506.118	454.641	403.586	360.97	357.595	320.464
	269.812	174.378	134.982	132.081	104.825	102.077	83.2952	45.5795	31.6842	18.8578	19.3159	17.1782	18.0944	15.3459	829.325	675.738	652.954	540.717	428.903	391.35	352.532	683.966	507.384	452.954	374.473	368.565	375.738	319.62
mean	267.216	175.701	135.084	131.623	111.951	108.388	87.6724	48.1753	34.2291	26.0345	19.6722	17.6363	17.8908	16.1093	828.481	675.035	652.954	541.421	458.72	402.461	354.782	680.169	506.118	454.782	391.632	363.783	362.236	321.167
%	100	65.7524	50.5524	49.2571	41.8952	40.5619	32.8095	100	71.0512	54.0412	40.8347	36.6086	37.1368	33.439	100	81.4787	78.8133	65.351	55.3688	48.5782	42.8232	100	74.4107	66.8631	57.5786	53.4843	53.2568	47.2188
stdev	2.76121	1.9092	0.0881585	0.403993	6.17299	5.51889	8.52407	2.3107	2.20396	0.323915	0.31786	0.458085	0.352634	0.763475	5.96715	0.298357	0.596715	1.49179	7.75729	3.28193	1.19343	4.86606	1.26582	1.90264	15.2386	4.16277	11.882	1.99402
stderror	1.59418	1.10228	0.0508984	0.233246	3.56398	3.18633	4.92137	1.33408	1.27246	0.187013	0.183517	0.264476	0.203593	0.440793	3.44513	0.172257	0.344513	0.861283	4.47867	1.89482	0.689027	2.80942	0.730823	1.09849	8.79803	2.40338	6.86006	1.15125

## Sheet: STORAGE
Free RoL
	4°C					Room Temperature
Day	0	30	60	90	120	Day	0	30	60	90	120
Control	0.022	0.033	0.058	0.005	0.005	Control	0.022	0.019	0.058	0.01	0.01
	0.025	0.033	0.065	0.007	0.007		0.025	0.019	0.065	0.011	0.011
Average	0.0235	0.033	0.0615	0.006	0.006	Average	0.0235	0.019	0.0615	0.0105	0.0105
A715	2.171	1.808	1.511	1.439	1.2	A715	2.171	1.344	0.994	0.76	0.65
	2.1	1.913	1.536	1.497	1.239		1.897	1.293	0.994	0.843	0.642
	2.306	1.89	1.535	1.249	1.301		2.1	1.203	1.015	0.853	0.553
U/ml	181.224	149.789	122.321	60.4641	50.3797	U/g	181.224	111.814	78.692	31.6245	26.9831
	175.232	158.65	124.43	62.9114	52.0253		158.101	107.511	78.692	35.1266	26.6456
	192.616	156.709	124.346	52.4473	54.6414		175.232	99.9156	80.4641	35.5485	22.8903
mean	183.024	155.049	123.699	58.6076	52.3488	mean	171.519	106.414	79.2827	34.0999	25.5063
%	100	84.7153	67.5863	32.0218	28.6022	%	100	62.0418	46.2239	19.8811	14.8708
stdev	8.8307	6.2655	1.19442	5.47354	2.14914	stdev	12	3.04324	1.02315	2.1541	2.27183
stderror	5.09841	3.61739	0.689601	3.16015	1.24081	stderror	6.92823	1.75702	0.590717	1.24367	1.31164
No Additives
Day	0	30	60	90	120	Day	0	30	60	90	120
Control	0.075	0.065	0.061	0.058	0.06	Control	0.075	0.065	0.061	0.058	0.06
	0.072	0.062	0.065	0.065	0.059		0.072	0.062	0.065	0.065	0.059
Average	0.0735	0.0635	0.063	0.0615	0.0595	Average	0.0735	0.0635	0.063	0.0615	0.0595
A715	1.219	1.086	0.789	0.643	0.401	A715	1.219	0.444	0.143	0.119	0.108
	1.219	1.081	0.8	0.701	0.451		1.192	0.446	0.146	0.12	0.098
	1.219	0.908	0.888	0.699	0.489		1.219	0.452	0.149	0.1	0.086
U/g	175.153	156.346	111.009	88.9144	52.2171	U/g	175.153	58.1804	12.2324	8.79205	7.4159
	175.153	155.581	122.324	97.7829	59.8624		171.024	58.4862	25.3823	17.8899	11.7737
	175.153	129.128	126.147	97.4771	65.6728		175.153	59.4037	26.2997	11.7737	8.10398
mean	175.153	147.018	119.827	94.7248	59.2508	mean	173.777	58.6901	21.3048	12.8186	9.09786
%	100	83.9371	68.4126	54.0812	33.828	%	100	33.7733	12.2599	7.37645	5.23537
stdev	0	15.4978	7.87177	5.03427	6.74865	stdev	2.38356	0.636595	7.87029	4.63805	2.34275
stderror	0	8.94768	4.54477	2.90654	3.89633	stderror	1.37615	0.367538	4.54391	2.67778	1.35258
Hen Egg Albumin
Day	0	30	60	90	120	Day	0	30	60	90	120
Control	0.075	0.065	0.061	0.058	0.06	Control	0.075	0.061	0.065	0.058	0.031
	0.072	0.062	0.065	0.065	0.059		0.072	0.06	0.062	0.065	0.033
Average	0.0735	0.0635	0.063	0.0615	0.0595	Average	0.0735	0.0605	0.0635	0.0615	0.032
A715	0.682	0.635	0.581	0.379	0.292	A715	0.682	0.364	0.35	0.301	0.171
	0.662	0.62	0.568	0.377	0.28		0.662	0.367	0.339	0.3	0.174
	0.633	0.645	0.58	0.385	0.267		0.633	0.36	0.26	0.299	0.135
U/g	92.9149	87.2652	79.096	48.4807	35.5016	U/g	92.9149	46.343	43.7471	36.5705	21.2246
	89.861	84.9748	77.111	48.1753	33.6693		89.861	46.801	42.0675	36.4178	21.6827
	85.4329	88.7922	78.9434	49.3969	31.6842		85.4329	45.7322	30.0046	36.2651	15.7276
mean	87.647	87.0107	78.3835	48.6843	33.6184	mean	89.403	46.2921	38.6064	36.4178	19.545
%	100	99.2741	89.4309	55.5459	38.3566	%	100	51.7791	43.1825	40.7344	21.8617
stdev	3.762	1.92137	1.40363	0.63572	1.9092	stdev	3.762	0.536247	1.18769	0.152695	3.31387
stderror	2.17199	1.1093	0.810388	0.367033	1.10228	stderror	2.17199	0.309603	0.685713	0.0881585	1.91326
Sodium Caseinate
Day	0	30	60	90	120	Day	0	30	60	90	120
Control	0.075	0.065	0.061	0.058	0.06	Control	0.075	0.065	0.061	0.058	0.06
	0.072	0.062	0.065	0.065	0.059		0.072	0.062	0.065	0.065	0.059
Average	0.0735	0.0635	0.063	0.0615	0.0595	Average	0.0735	0.0635	0.063	0.0615	0.0595
A715	1.731	1.521	1.358	1.135	1.026	A715	1.731	1.515	1.352	1.13	0.859
	1.706	1.52	1.359	1.15	1.002		1.706	1.516	1.361	1.186	0.886
	1.737	1.425	1.372	1.158	1.033		1.737	1.444	1.366	1.018	0.838
U/g	699.367	614.979	546.414	452.954	407.806	U/g	699.367	612.447	543.882	450.844	337.342
	688.819	614.557	546.835	459.283	397.679		688.819	612.869	547.679	474.473	348.734
	701.899	574.473	552.321	462.658	410.759		701.899	582.489	549.789	403.586	328.481
mean	696.695	601.336	548.523	458.298	405.415	mean	696.695	602.602	547.117	442.968	338.186
%	100	86.3127	78.7322	65.7818	58.1912	%	100	86.4944	78.5303	63.5813	48.5414
stdev	7.45893	23.2655	3.87864	4.92666	9.24908	stdev	7.45893	17.4192	1.49179	36.0934	14.3211
stderror	4.30642	13.4323	2.23934	2.84441	5.33996	stderror	4.30642	10.057	0.861283	20.8385	8.26832
CAVAMAX® W6
Day	0	30	60	90	120	Day	0	30	60	90	120
Control	0.075	0.065	0.061	0.058	0.06	Control	0.075	0.065	0.061	0.058	0.06
	0.072	0.062	0.065	0.065	0.059		0.072	0.062	0.065	0.065	0.059
Average	0.0735	0.0635	0.063	0.0615	0.0595	Average	0.0735	0.0635	0.063	0.0615	0.0595
A715	1.118	1.108	1.059	0.957	0.891	A715	1.118	1.082	0.608	0.431	0.204
	1.132	1.129	1.129	0.973	0.888		1.132	1.015	0.602	0.581	0.178
	1.13	1.1	1.113	0.904	0.8		1.13	1.019	0.606	0.489	0.191
U/g	440.717	440.717	420.253	377.848	350.844	U/g	440.717	429.747	229.958	155.907	60.9705
	446.624	449.578	449.789	384.599	349.578		446.624	401.477	227.426	219.198	50
	445.781	437.342	443.038	355.485	312.447		445.781	403.165	229.114	180.38	55.4852
mean	444.374	442.546	437.693	372.644	337.623	mean	444.374	411.463	228.833	185.162	55.4852
%	100	99.5885	98.4966	83.8582	75.9772	%	100	92.5938	51.4955	41.668	29.9658
stdev	3.19489	6.2655	15.4763	15.2386	21.8121	stdev	3.19489	19.9899	1.28905	31.9154	5.48523
stderror	1.84457	3.61739	8.93523	8.79803	12.5932	stderror	1.84457	11.5412	0.744234	18.4264	3.1669

## Sheet: ESTER
Duration:		18 hours
		HEA
	Without solvent	Solvent	Std error	Std error
Free RoL	59	36
No Additives	8	26	0.14	0.15
Hen Egg Albumin	69	78	0.14	0.264575
Sodium Caseinate	48	76	0.12	0.15
CAVAMAX® W6	48	66	0.12	0

## Sheet: FTIR
	Empty support				No Additives				Hen egg albumin				Sodium caseinate				CAVAMAX® W6				Absolute ethanol				Free ROL
Wavenumber (cm-1)	Transmittance	Absorbance	Normalized Absorbance		Transmittance	Absorbance	Normalized Absorbance		Transmittance	Absorbance	Normalized Absorbance		Transmittance	Absorbance	Normalized Absorbance		Transmittance	Absorbance	Normalized Absorbance		Transmittance	Absorbance	Normalized Absorbance		Transmittance	Absorbance	Normalized Absorbance
399.199	97.5356	0.010837	0.010837		69.1849	0.159989	1.15999		83.536	0.0781262	2.07813		67.9583	0.167758	3.16776		100	0	4		97.9635	0.00893584	5.00894		29.2035	0.534565	5.53457
401.128	98.2187	0.00780591	0.00780591		78.6139	0.104501	1.1045		86.4983	0.0629925	2.06299		79.1567	0.101512	3.10151		94.4621	0.0247422	4.02474		94.3529	0.0252449	5.02524		44.4263	0.35236	5.35236
403.056	96.7027	0.0145612	0.0145612		86.8668	0.0611462	1.06115		92.8163	0.0323755	2.03238		92.0279	0.0360807	3.03608		90.9877	0.0410174	4.04102		87.2853	0.0590591	5.05906		60.0137	0.221749	5.22175
404.985	93.3958	0.0296724	0.0296724		93.8301	0.0276577	1.02766		93.1214	0.0309506	2.03095		92.3506	0.0345603	3.03456		88.4711	0.0531986	4.0532		82.4523	0.0837971	5.0838		61.0649	0.214208	5.21421
406.913	87.57	0.0576448	0.0576448		95.6342	0.0193867	1.01939		88.6957	0.0520975	2.0521		87.1467	0.0597492	3.05975		86.1387	0.0648018	4.0648		85.3118	0.0689908	5.06899		58.4913	0.232909	5.23291
408.842	81.6784	0.0878928	0.0878928		96.814	0.0140619	1.01406		87.2347	0.0593107	2.05931		88.1265	0.0548937	3.05489		84.4025	0.0736449	4.07364		82.0033	0.0861686	5.08617		58.7738	0.230816	5.23082
410.77	78.3373	0.106032	0.106032		96.0591	0.0174613	1.01746		88.6142	0.0524968	2.0525		86.6965	0.0619983	3.062		83.3148	0.0792777	4.07928		77.5855	0.110219	5.11022		59.0264	0.228954	5.22895
412.699	75.9139	0.119678	0.119678		95.1985	0.0213699	1.02137		87.7388	0.0568084	2.05681		86.6872	0.0620451	3.06205		81.899	0.0867215	4.08672		74.0203	0.130649	5.13065		57.9641	0.236841	5.23684
414.627	73.5385	0.133485	0.133485		94.0397	0.0266886	1.02669		86.6973	0.0619946	2.06199		85.9154	0.0659288	3.06593		81.2885	0.0899707	4.08997		71.8468	0.143592	5.14359		55.6857	0.254256	5.25426
416.556	72.7082	0.138416	0.138416		92.9457	0.0317709	1.03177		84.8577	0.0713085	2.07131		85.6008	0.0675219	3.06752		80.2754	0.0954173	4.09542		71.6848	0.144573	5.14457		55.47	0.255942	5.25594
418.484	73.2548	0.135164	0.135164		91.9196	0.0365917	1.03659		84.1409	0.0749931	2.07499		86.6014	0.0624753	3.06248		80.2032	0.0958085	4.09581		71.4349	0.14609	5.14609		55.7362	0.253862	5.25386
420.413	74.0494	0.130478	0.130478		91.2146	0.0399357	1.03994		85.2389	0.0693624	2.06936		88.9895	0.050661	3.05066		80.1766	0.0959521	4.09595		70.5914	0.151248	5.15125		56.2879	0.249585	5.24959
422.341	75.1185	0.124253	0.124253		91.4956	0.0385997	1.0386		86.2174	0.064405	2.06441		90.8787	0.041538	3.04154		80.0415	0.0966846	4.09668		70.3966	0.152448	5.15245		56.5833	0.247311	5.24731
424.27	76.0342	0.118991	0.118991		91.3947	0.0390791	1.03908		86.0491	0.0652536	2.06525		91.0871	0.0405429	3.04054		80.3172	0.0951917	4.09519		72.946	0.136999	5.137		56.4424	0.248395	5.24839
426.198	76.117	0.118518	0.118518		91.1735	0.0401315	1.04013		85.1308	0.0699135	2.06991		90.7174	0.0423093	3.04231		80.5111	0.0941443	4.09414		75.4022	0.122616	5.12262		55.8185	0.253222	5.25322
428.127	74.9741	0.125089	0.125089		91.4647	0.0387466	1.03875		83.8507	0.0764934	2.07649		90.8052	0.0418892	3.04189		80.5673	0.093841	4.09384		76.1081	0.118569	5.11857		55.7984	0.253378	5.25338
430.055	74.3885	0.128494	0.128494		91.8501	0.0369202	1.03692		83.6935	0.0773081	2.07731		91.7152	0.0375586	3.03756		81.0582	0.0912033	4.0912		76.6222	0.115646	5.11565		56.1116	0.250948	5.25095
431.984	74.5611	0.127488	0.127488		92.151	0.0354998	1.0355		84.2331	0.0745171	2.07452		93.2941	0.030146	3.03015		81.9635	0.0863797	4.08638		76.5649	0.11597	5.11597		56.1904	0.250338	5.25034
433.912	74.5516	0.127543	0.127543		91.6817	0.0377174	1.03772		84.9996	0.070583	2.07058		92.5889	0.0334413	3.03344		82.8648	0.0816299	4.08163		76.5619	0.115987	5.11599		55.9962	0.251842	5.25184
435.841	74.2364	0.129383	0.129383		90.7137	0.042327	1.04233		85.2332	0.0693912	2.06939		91.7455	0.0374152	3.03742		83.386	0.0789066	4.07891		76.4332	0.116718	5.11672		54.9098	0.26035	5.26035
437.769	73.8371	0.131725	0.131725		90.1888	0.0448475	1.04485		84.7787	0.0717132	2.07171		91.9454	0.0364702	3.03647		83.751	0.0770103	4.07701		76.8111	0.114576	5.11458		53.8949	0.268452	5.26845
439.698	73.0242	0.136533	0.136533		90.0334	0.0455963	1.0456		85.2686	0.0692106	2.06921		91.986	0.0362785	3.03628		83.7755	0.0768831	4.07688		77.4387	0.111042	5.11104		53.7007	0.27002	5.27002
441.626	72.3744	0.140415	0.140415		90.076	0.0453907	1.04539		84.9412	0.0708815	2.07088		91.1382	0.0402995	3.0403		83.287	0.0794227	4.07942		78.1096	0.107295	5.1073		53.7677	0.269478	5.26948
443.555	72.431	0.140075	0.140075		90.0998	0.0452764	1.04528		84.2669	0.0743431	2.07434		90.2876	0.0443717	3.04437		82.6094	0.0829708	4.08297		78.7087	0.103977	5.10398		53.7256	0.269819	5.26982
445.483	72.543	0.139404	0.139404		89.9198	0.0461449	1.04614		83.8076	0.0767164	2.07672		89.9387	0.0460535	3.04605		81.9939	0.0862185	4.08622		78.1978	0.106805	5.10681		53.6353	0.270549	5.27055
447.412	71.8712	0.143445	0.143445		89.2613	0.0493366	1.04934		83.1046	0.0803751	2.08038		89.0268	0.0504793	3.05048		80.8755	0.092183	4.09218		77.4329	0.111075	5.11107		53.758	0.269557	5.26956
449.34	70.891	0.149409	0.149409		88.4635	0.0532358	1.05324		82.1857	0.0852036	2.0852		87.9806	0.0556129	3.05561		79.3305	0.10056	4.10056		76.8446	0.114387	5.11439		53.5859	0.27095	5.27095
451.269	69.9772	0.155043	0.155043		87.7171	0.0569156	1.05692		80.5681	0.0938368	2.09384		86.8648	0.0611563	3.06116		77.9141	0.108384	4.10838		75.3833	0.122725	5.12272		53.2099	0.274007	5.27401
453.197	68.9393	0.161533	0.161533		87.111	0.0599272	1.05993		78.9611	0.102587	2.10259		85.7673	0.0666784	3.06668		76.6609	0.115426	4.11543		73.2283	0.135321	5.13532		53.1179	0.274759	5.27476
455.126	68.6364	0.163446	0.163446		86.6588	0.0621871	1.06219		78.1343	0.107158	2.10716		85.169	0.0697187	3.06972		75.8194	0.120219	4.12022		71.1232	0.147989	5.14799		53.1462	0.274528	5.27453
457.054	69.3478	0.158968	0.158968		86.2066	0.0644595	1.06446		77.739	0.109361	2.10936		85.2539	0.0692858	3.06929		75.5965	0.121498	4.1215		69.7478	0.15647	5.15647		52.8409	0.27703	5.27703
458.983	70.5036	0.151789	0.151789		85.7766	0.066631	1.06663		76.8554	0.114326	2.11433		86.0195	0.0654032	3.0654		75.7179	0.120801	4.1208		68.7993	0.162416	5.16242		52.2957	0.281534	5.28153
460.911	71.5826	0.145192	0.145192		85.5936	0.0675589	1.06756		76.4021	0.116895	2.11689		86.7053	0.0619541	3.06195		76.1061	0.118581	4.11858		68.4407	0.164686	5.16469		51.7527	0.286067	5.28607
462.84	72.3539	0.140538	0.140538		85.7375	0.0668293	1.06683		76.6013	0.115764	2.11576		87.3026	0.0589727	3.05897		76.8372	0.114429	4.11443		69.1732	0.160062	5.16006		51.0512	0.291994	5.29199
464.768	72.9474	0.13699	0.13699		86.28	0.0640898	1.06409		77.1548	0.112637	2.11264		88.0798	0.0551235	3.05512		77.5753	0.110277	4.11028		70.3556	0.152702	5.1527		50.5686	0.296119	5.29612
466.697	73.0255	0.136525	0.136525		87.1407	0.0597789	1.05978		78.3958	0.105707	2.10571		88.6845	0.0521522	3.05215		77.9696	0.108074	4.10807		71.5954	0.145115	5.14512		50.5867	0.295963	5.29596
468.625	73.095	0.136112	0.136112		88.1496	0.0547798	1.05478		79.8006	0.0979938	2.09799		89.0348	0.0504405	3.05044		78.294	0.106271	4.10627		72.5416	0.139413	5.13941		50.6761	0.295197	5.2952
470.554	73.2522	0.135179	0.135179		89.1703	0.0497799	1.04978		80.8662	0.0922331	2.09223		89.8662	0.0464035	3.0464		78.89	0.102978	4.10298		72.844	0.137606	5.13761		50.7189	0.294831	5.29483
472.482	73.0363	0.136461	0.136461		90.1089	0.0452321	1.04523		81.1839	0.0905302	2.09053		90.6931	0.0424257	3.04243		79.4247	0.100044	4.10004		72.7387	0.138235	5.13823		50.7523	0.294545	5.29454
474.411	72.7414	0.138218	0.138218		90.812	0.0418566	1.04186		81.118	0.0908829	2.09088		90.32	0.0442158	3.04422		79.4321	0.100004	4.1		73.042	0.136427	5.13643		50.8174	0.293987	5.29399
476.339	72.5985	0.139073	0.139073		91.3783	0.0391567	1.03916		81.2746	0.0900452	2.09005		89.6737	0.047335	3.04733		79.3386	0.100515	4.10052		73.2728	0.135057	5.13506		50.6282	0.295608	5.29561
478.268	72.6079	0.139016	0.139016		91.8805	0.0367764	1.03678		81.4243	0.0892458	2.08925		89.2725	0.0492821	3.04928		79.4746	0.0997719	4.09977		73.1146	0.135996	5.136		50.4028	0.297545	5.29755
480.196	72.7458	0.138192	0.138192		92.1477	0.0355156	1.03552		81.8088	0.0872002	2.0872		88.9961	0.0506291	3.05063		79.6584	0.0987685	4.09877		72.7094	0.138409	5.13841		50.332	0.298156	5.29816
482.125	73.1908	0.135544	0.135544		92.1608	0.0354539	1.03545		82.1678	0.0852981	2.0853		88.858	0.0513035	3.0513		79.7047	0.098516	4.09852		72.0856	0.142152	5.14215		50.1227	0.299966	5.29997
484.053	73.9808	0.130881	0.130881		92.0483	0.0359842	1.03598		82.0558	0.085891	2.08589		88.7652	0.0517571	3.05176		79.6513	0.0988069	4.09881		71.502	0.145682	5.14568		49.6748	0.303864	5.30386
485.982	74.9411	0.12528	0.12528		91.9654	0.0363756	1.03638		81.4965	0.088861	2.08886		88.8241	0.0514693	3.05147		79.558	0.0993164	4.09932		71.048	0.148448	5.14845		49.207	0.307973	5.30797
487.91	75.6083	0.121431	0.121431		91.8146	0.0370883	1.03709		81.2793	0.0900198	2.09002		88.696	0.0520961	3.0521		79.4228	0.100055	4.10005		70.7196	0.15046	5.15046		48.6185	0.313198	5.3132
489.839	75.9019	0.119747	0.119747		91.4756	0.0386947	1.03869		81.31	0.0898562	2.08986		88.5407	0.0528572	3.05286		79.2477	0.101013	4.10101		70.6627	0.15081	5.15081		48.1266	0.317615	5.31761
491.767	75.5989	0.121485	0.121485		90.8436	0.0417058	1.04171		80.9118	0.0919881	2.09199		88.419	0.0534544	3.05345		78.9129	0.102852	4.10285		70.4563	0.15208	5.15208		47.7946	0.320621	5.32062
493.696	75.0582	0.124602	0.124602		90.1033	0.0452594	1.04526		80.766	0.0927715	2.09277		88.3645	0.053722	3.05372		78.4884	0.105194	4.10519		70.4717	0.151985	5.15199		47.319	0.324965	5.32496
495.624	74.4389	0.1282	0.1282		89.5816	0.0477812	1.04778		80.8283	0.0924367	2.09244		88.1876	0.0545927	3.05459		78.1391	0.107131	4.10713		70.5615	0.151432	5.15143		46.6037	0.33158	5.33158
497.553	73.7915	0.131993	0.131993		89.2887	0.0492034	1.0492		80.3259	0.0951444	2.09514		87.9748	0.0556415	3.05564		77.9296	0.108298	4.1083		70.3369	0.152817	5.15282		45.8292	0.338857	5.33886
499.481	73.2443	0.135226	0.135226		88.9933	0.0506426	1.05064		79.403	0.100163	2.10016		87.5414	0.0577865	3.05779		77.7033	0.10956	4.10956		70.0778	0.15442	5.15442		45.0552	0.346255	5.34626
501.41	72.8143	0.137783	0.137783		88.7839	0.0516657	1.05167		78.3585	0.105914	2.10591		87.0338	0.0603121	3.06031		77.601	0.110133	4.11013		69.7961	0.156169	5.15617		44.5378	0.351271	5.35127
503.338	72.3093	0.140806	0.140806		88.797	0.0516017	1.0516		77.191	0.112433	2.11243		86.8618	0.0611712	3.06117		77.7156	0.109492	4.10949		69.4599	0.158266	5.15827		44.0819	0.35574	5.35574
505.267	71.7965	0.143896	0.143896		89.1788	0.0497386	1.04974		75.6963	0.120926	2.12093		86.819	0.0613853	3.06139		77.8366	0.108816	4.10882		68.9336	0.161569	5.16157		43.6662	0.359855	5.35985
507.195	71.2378	0.14729	0.14729		89.6496	0.0474518	1.04745		74.2359	0.129386	2.12939		86.5348	0.0628094	3.06281		77.8758	0.108598	4.1086		68.16	0.16647	5.16647		43.4186	0.362324	5.36232
509.124	70.8755	0.149504	0.149504		89.9771	0.0458678	1.04587		72.8496	0.137573	2.13757		86.111	0.0649415	3.06494		77.8635	0.108666	4.10867		67.7097	0.169349	5.16935		43.2448	0.364066	5.36407
511.052	70.8055	0.149933	0.149933		90.3143	0.0442434	1.04424		71.8993	0.143275	2.14328		85.5621	0.0677186	3.06772		77.9216	0.108342	4.10834		67.5248	0.170537	5.17054		43.0773	0.365752	5.36575
512.981	70.823	0.149826	0.149826		90.627	0.0427426	1.04274		71.4406	0.146055	2.14606		85.2852	0.0691262	3.06913		77.8208	0.108905	4.1089		67.132	0.173071	5.17307		43.117	0.365352	5.36535
514.909	70.8681	0.149549	0.149549		90.7064	0.0423621	1.04236		70.8809	0.149471	2.14947		85.3835	0.0686261	3.06863		77.529	0.110536	4.11054		66.7823	0.175339	5.17534		43.2511	0.364003	5.364
516.838	70.7742	0.150125	0.150125		90.6089	0.042829	1.04283		69.9731	0.155069	2.15507		85.4587	0.0682438	3.06824		77.0917	0.112992	4.11299		66.7271	0.175698	5.1757		43.4914	0.361597	5.3616
518.766	70.3091	0.152988	0.152988		90.3888	0.0438853	1.04389		69.0058	0.161114	2.16111		85.2837	0.0691341	3.06913		76.6921	0.115249	4.11525		66.8767	0.174725	5.17472		43.6969	0.35955	5.35955
520.695	69.9127	0.155444	0.155444		90.0219	0.045652	1.04565		68.7531	0.162707	2.16271		85.2278	0.0694187	3.06942		76.4507	0.116618	4.11662		67.2096	0.172569	5.17257		43.8927	0.357608	5.35761
522.623	70.0093	0.154844	0.154844		89.5847	0.0477661	1.04777		69.1817	0.160009	2.16001		85.2379	0.0693672	3.06937		76.2927	0.117517	4.11752		67.4632	0.170933	5.17093		44.2738	0.353853	5.35385
524.552	70.3425	0.152782	0.152782		89.1127	0.0500602	1.05006		69.733	0.156562	2.15656		85.3862	0.0686123	3.06861		76.2948	0.117505	4.1175		67.4938	0.170736	5.17074		44.7142	0.349554	5.34955
526.48	70.6798	0.150705	0.150705		88.6998	0.0520775	1.05208		70.2371	0.153433	2.15343		85.5923	0.0675654	3.06757		76.3606	0.117131	4.11713		67.6288	0.169868	5.16987		45.1075	0.345752	5.34575
528.409	70.8374	0.149738	0.149738		88.5573	0.0527758	1.05278		70.5884	0.151266	2.15127		85.8253	0.0663845	3.06638		76.527	0.116185	4.11619		67.9458	0.167838	5.16784		45.584	0.341188	5.34119
530.337	70.7229	0.15044	0.15044		88.7249	0.0519544	1.05195		70.7731	0.150132	2.15013		86.3118	0.0639297	3.06393		76.7269	0.115052	4.11505		68.3842	0.165044	5.16504		46.1407	0.335916	5.33592
532.266	70.6329	0.150993	0.150993		89.0408	0.0504108	1.05041		70.9403	0.149107	2.14911		86.8811	0.0610748	3.06107		76.8302	0.114468	4.11447		69.0441	0.160873	5.16087		46.7625	0.330102	5.3301
534.194	70.4531	0.1521	0.1521		89.1624	0.0498183	1.04982		71.3235	0.146767	2.14677		87.227	0.059349	3.05935		77.1998	0.112384	4.11238		69.6771	0.15691	5.15691		47.4658	0.323619	5.32362
536.123	70.2334	0.153456	0.153456		89.2453	0.0494147	1.04941		71.8622	0.143499	2.1435		87.5775	0.0576075	3.05761		77.8507	0.108738	4.10874		70.2077	0.153615	5.15362		47.9945	0.318809	5.31881
538.051	70.1352	0.154064	0.154064		89.3525	0.0488935	1.04889		72.5806	0.13918	2.13918		87.9788	0.0556217	3.05562		78.5115	0.105066	4.10507		70.4039	0.152403	5.1524		48.3073	0.315987	5.31599
539.98	70.2502	0.153352	0.153352		89.4062	0.0486323	1.04863		73.3165	0.134798	2.1348		88.4029	0.0535337	3.05353		78.9904	0.102426	4.10243		70.2483	0.153364	5.15336		48.5961	0.313399	5.3134
541.908	70.4095	0.152368	0.152368		89.4736	0.0483049	1.0483		73.5221	0.133582	2.13358		88.7953	0.0516101	3.05161		79.3117	0.100663	4.10066		70.2015	0.153653	5.15365		48.7447	0.312072	5.31207
543.837	70.3745	0.152585	0.152585		89.6772	0.047318	1.04732		73.4914	0.133764	2.13376		89.0148	0.050538	3.05054		79.5287	0.0994762	4.09948		70.3265	0.152881	5.15288		48.8129	0.311465	5.31147
545.765	70.438	0.152193	0.152193		89.9132	0.0461764	1.04618		73.8447	0.131681	2.13168		89.1695	0.0497835	3.04978		79.6787	0.0986578	4.09866		70.3278	0.152873	5.15287		48.8579	0.311065	5.31107
547.693	70.7215	0.150448	0.150448		90.0941	0.0453037	1.0453		74.6813	0.126788	2.12679		89.2986	0.0491553	3.04916		79.781	0.0981003	4.0981		70.2423	0.153402	5.1534		48.9889	0.309902	5.3099
549.622	71.0471	0.148454	0.148454		90.2643	0.0444841	1.04448		75.6569	0.121152	2.12115		89.2639	0.0493241	3.04932		79.6849	0.0986238	4.09862		70.0023	0.154888	5.15489		49.1878	0.308142	5.30814
551.551	71.2591	0.14716	0.14716		90.4644	0.0435225	1.04352		76.5872	0.115844	2.11584		89.2178	0.0495487	3.04955		79.4504	0.0999038	4.0999		69.796	0.156169	5.15617		49.3393	0.306807	5.30681
553.479	71.3751	0.146453	0.146453		90.6193	0.0427792	1.04278		77.4038	0.111238	2.11124		89.0769	0.0502347	3.05023		79.1741	0.101417	4.10142		69.7049	0.156737	5.15674		49.5065	0.305338	5.30534
555.408	71.2566	0.147175	0.147175		90.6948	0.0424175	1.04242		78.0797	0.107462	2.10746		88.966	0.0507758	3.05078		78.8323	0.103296	4.1033		69.5503	0.157701	5.1577		49.7083	0.303571	5.30357
557.336	71.1052	0.148099	0.148099		90.7733	0.0420419	1.04204		78.6684	0.1042	2.1042		89.132	0.0499665	3.04997		78.3525	0.105947	4.10595		69.5442	0.157739	5.15774		49.9454	0.301504	5.3015
559.264	71.0726	0.148298	0.148298		90.8226	0.0418062	1.04181		79.1258	0.101682	2.10168		89.35	0.0489056	3.04891		77.9091	0.108412	4.10841		69.9057	0.155488	5.15549		50.2038	0.299263	5.29926
561.193	70.9815	0.148855	0.148855		90.7066	0.0423613	1.04236		79.3537	0.100433	2.10043		89.2266	0.0495058	3.04951		77.835	0.108825	4.10883		70.2671	0.153248	5.15325		50.4397	0.297228	5.29723
563.121	70.8401	0.149721	0.149721		90.5609	0.0430591	1.04306		79.5444	0.0993902	2.09939		89.0007	0.0506066	3.05061		77.8851	0.108546	4.10855		70.3597	0.152676	5.15268		50.5324	0.29643	5.29643
565.05	70.8879	0.149428	0.149428		90.3859	0.0438995	1.0439		79.5488	0.0993663	2.09937		88.7538	0.0518132	3.05181		77.828	0.108864	4.10886		70.1937	0.153702	5.1537		50.6216	0.295664	5.29566
566.979	71.0133	0.14866	0.14866		90.1961	0.0448124	1.04481		79.3086	0.10068	2.10068		88.4212	0.0534436	3.05344		77.7642	0.10922	4.10922		70.062	0.154517	5.15452		50.7941	0.294187	5.29419
568.907	70.8859	0.14944	0.14944		90.0802	0.0453708	1.04537		78.9175	0.102827	2.10283		88.1016	0.0550164	3.05502		77.6704	0.109744	4.10974		70.2138	0.153578	5.15358		50.9754	0.29264	5.29264
570.836	70.7631	0.150193	0.150193		90.0592	0.0454721	1.04547		78.6895	0.104083	2.10408		87.7872	0.0565689	3.05657		77.5712	0.110299	4.1103		70.3785	0.15256	5.15256		51.2106	0.29064	5.29064
572.764	70.8137	0.149883	0.149883		90.0778	0.0453823	1.04538		78.7118	0.10396	2.10396		87.5102	0.0579412	3.05794		77.4263	0.111111	4.11111		70.4661	0.15202	5.15202		51.4537	0.288583	5.28858
574.693	70.6753	0.150732	0.150732		90.1821	0.0448798	1.04488		78.643	0.10434	2.10434		87.377	0.0586028	3.0586		77.3036	0.111801	4.1118		70.5847	0.151289	5.15129		51.7462	0.286122	5.28612
576.621	70.391	0.152483	0.152483		90.3172	0.0442297	1.04423		78.5327	0.10495	2.10495		87.3358	0.0588075	3.05881		77.1999	0.112383	4.11238		70.5335	0.151605	5.1516		52.0441	0.283628	5.28363
578.55	70.272	0.153218	0.153218		90.3531	0.0440568	1.04406		78.673	0.104174	2.10417		87.537	0.0578082	3.05781		77.2234	0.112251	4.11225		70.3772	0.152568	5.15257		52.3513	0.281073	5.28107
580.478	70.2203	0.153537	0.153537		90.3693	0.043979	1.04398		78.9515	0.10264	2.10264		87.7752	0.056628	3.05663		77.352	0.111528	4.11153		70.1294	0.1541	5.1541		52.6927	0.278249	5.27825
582.407	70.0904	0.154342	0.154342		90.3696	0.0439774	1.04398		79.2078	0.101232	2.10123		87.9247	0.0558891	3.05589		77.4969	0.110716	4.11072		69.849	0.15584	5.15584		52.9896	0.275809	5.27581
584.335	70.1392	0.154039	0.154039		90.3057	0.044285	1.04428		79.3345	0.100538	2.10054		88.0685	0.0551796	3.05518		77.5657	0.11033	4.11033		69.7046	0.156739	5.15674		53.2669	0.273543	5.27354
586.264	70.3116	0.152973	0.152973		90.2556	0.0445257	1.04453		79.4693	0.0998006	2.0998		88.1742	0.0546583	3.05466		77.6287	0.109978	4.10998		69.6457	0.157106	5.15711		53.5981	0.270851	5.27085
588.192	70.545	0.151534	0.151534		90.169	0.0449426	1.04494		79.6476	0.0988272	2.09883		88.1513	0.0547711	3.05477		77.8029	0.109004	4.109		69.5653	0.157608	5.15761		53.9275	0.26819	5.26819
590.12	70.7159	0.150483	0.150483		90.1412	0.0450767	1.04508		79.7388	0.0983302	2.09833		88.2516	0.0542776	3.05428		77.9942	0.107938	4.10794		69.3805	0.158762	5.15876		54.2151	0.265879	5.26588
592.049	70.8861	0.149439	0.149439		90.125	0.0451546	1.04515		79.595	0.0991144	2.09911		88.4445	0.0533292	3.05333		78.1476	0.107084	4.10708		69.1916	0.159946	5.15995		54.5242	0.263411	5.26341
593.977	71.0125	0.148665	0.148665		90.0716	0.0454123	1.04541		79.3659	0.100366	2.10037		88.569	0.0527184	3.05272		78.2349	0.1066	4.1066		69.1997	0.159896	5.1599		54.8532	0.260798	5.2608
595.906	71.0053	0.148709	0.148709		89.9965	0.0457741	1.04577		79.3177	0.10063	2.10063		88.6029	0.052552	3.05255		78.2068	0.106756	4.10676		69.3561	0.158915	5.15892		55.19	0.25814	5.25814
597.835	71.1368	0.147905	0.147905		89.9702	0.0459012	1.0459		79.3886	0.100242	2.10024		88.5726	0.0527007	3.0527		78.1528	0.107056	4.10706		69.3619	0.158879	5.15888		55.4774	0.255884	5.25588
599.763	71.2518	0.147204	0.147204		90.05	0.0455165	1.04552		79.2762	0.100857	2.10086		88.5066	0.0530246	3.05302		78.1021	0.107337	4.10734		69.3997	0.158642	5.15864		55.6763	0.254329	5.25433
601.692	71.1058	0.148095	0.148095		90.2407	0.0445976	1.0446		78.9691	0.102543	2.10254		88.5058	0.0530281	3.05303		78.0902	0.107404	4.1074		69.6217	0.157255	5.15726		55.8811	0.252735	5.25274
603.62	70.9951	0.148772	0.148772		90.3842	0.0439076	1.04391		78.8505	0.103195	2.1032		88.5728	0.0526994	3.0527		78.1258	0.107205	4.10721		69.8163	0.156043	5.15604		56.0911	0.251106	5.25111
605.548	70.9913	0.148795	0.148795		90.3995	0.0438339	1.04383		78.9939	0.102407	2.10241		88.7069	0.0520424	3.05204		78.1999	0.106794	4.10679		69.8934	0.155564	5.15556		56.3308	0.249254	5.24925
607.477	70.9304	0.149167	0.149167		90.4093	0.0437867	1.04379		79.1304	0.101656	2.10166		88.7341	0.0519096	3.05191		78.2192	0.106687	4.10669		69.9577	0.155164	5.15516		56.6315	0.246942	5.24694
609.405	70.8483	0.149671	0.149671		90.4549	0.0435678	1.04357		79.1746	0.101414	2.10141		88.6299	0.0524199	3.05242		78.2764	0.106369	4.10637		70.0271	0.154734	5.15473		56.9967	0.24415	5.24415
611.334	70.8752	0.149506	0.149506		90.5316	0.0431996	1.0432		79.1304	0.101656	2.10166		88.5251	0.0529334	3.05293		78.2931	0.106277	4.10628		70.054	0.154567	5.15457		57.477	0.240506	5.24051
613.263	70.9862	0.148826	0.148826		90.656	0.0426033	1.0426		79.1202	0.101712	2.10171		88.457	0.0532679	3.05327		78.2825	0.106336	4.10634		70.1138	0.154196	5.1542		58.0733	0.236023	5.23602
615.191	71.0294	0.148562	0.148562		90.7232	0.0422816	1.04228		79.1967	0.101293	2.10129		88.427	0.053415	3.05341		78.317	0.106144	4.10614		70.1423	0.15402	5.15402		58.7096	0.231291	5.23129
617.12	70.948	0.14906	0.14906		90.7721	0.0420477	1.04205		79.1804	0.101382	2.10138		88.4229	0.0534352	3.05344		78.2986	0.106246	4.10625		70.1069	0.154239	5.15424		59.2758	0.227123	5.22712
619.048	70.8314	0.149774	0.149774		90.7406	0.0421983	1.0422		79.1265	0.101678	2.10168		88.3798	0.0536471	3.05365		78.22	0.106682	4.10668		70.2349	0.153447	5.15345		59.7449	0.223699	5.2237
620.976	70.7843	0.150063	0.150063		90.6597	0.0425858	1.04259		79.242	0.101045	2.10104		88.3535	0.0537761	3.05378		78.1091	0.107298	4.1073		70.3736	0.15259	5.15259		60.137	0.220858	5.22086
622.905	70.7735	0.150129	0.150129		90.5833	0.042952	1.04295		79.431	0.10001	2.10001		88.362	0.0537344	3.05373		78.0088	0.107857	4.10786		70.272	0.153218	5.15322		60.4902	0.218315	5.21832
624.833	70.704	0.150556	0.150556		90.4944	0.0433783	1.04338		79.4743	0.0997732	2.09977		88.3369	0.0538577	3.05386		77.9339	0.108274	4.10827		70.1915	0.153715	5.15372		60.7793	0.216244	5.21624
626.762	70.5827	0.151302	0.151302		90.4488	0.0435971	1.0436		79.4311	0.10001	2.10001		88.2195	0.0544354	3.05444		77.9257	0.108319	4.10832		70.2661	0.153254	5.15325		61.0245	0.214496	5.2145
628.691	70.486	0.151897	0.151897		90.4773	0.0434604	1.04346		79.3979	0.100191	2.10019		88.0758	0.0551435	3.05514		77.9869	0.107979	4.10798		70.3766	0.152572	5.15257		61.2352	0.212999	5.213
630.619	70.5186	0.151697	0.151697		90.4587	0.0435495	1.04355		79.4884	0.0996962	2.0997		87.9652	0.055689	3.05569		78.0385	0.107691	4.10769		70.3541	0.15271	5.15271		61.4539	0.21145	5.21145
632.548	70.4676	0.15201	0.15201		90.4401	0.0436389	1.04364		79.6495	0.0988168	2.09882		87.887	0.0560752	3.05608		78.0934	0.107386	4.10739		70.1887	0.153733	5.15373		61.6893	0.20979	5.20979
634.476	70.3321	0.152847	0.152847		90.4471	0.0436051	1.04361		79.7067	0.0985051	2.09851		87.7756	0.0566262	3.05663		78.159	0.107021	4.10702		70.046	0.154617	5.15462		61.9515	0.207948	5.20795
636.404	70.3358	0.152823	0.152823		90.5391	0.043164	1.04316		79.7844	0.098082	2.09808		87.7147	0.0569276	3.05693		78.2931	0.106277	4.10628		69.9133	0.15544	5.15544		62.2651	0.205756	5.20576
638.333	70.4319	0.15223	0.15223		90.6753	0.0425109	1.04251		79.9343	0.0972667	2.09727		87.812	0.0564462	3.05645		78.371	0.105844	4.10584		69.7841	0.156243	5.15624		62.6606	0.203006	5.20301
640.261	70.4856	0.1519	0.1519		90.7915	0.0419547	1.04195		80.1092	0.0963176	2.09632		88.0236	0.0554009	3.0554		78.3895	0.105742	4.10574		69.7587	0.156402	5.1564		63.1444	0.199665	5.19966
642.19	70.4851	0.151903	0.151903		90.879	0.0415366	1.04154		80.1817	0.095925	2.09593		88.252	0.0542754	3.05428		78.3681	0.105861	4.10586		69.6715	0.156945	5.15694		63.5865	0.196635	5.19664
644.119	70.3602	0.152673	0.152673		90.9309	0.0412887	1.04129		80.0669	0.096547	2.09655		88.4116	0.0534906	3.05349		78.2921	0.106282	4.10628		69.5029	0.157997	5.158		63.9465	0.194183	5.19418
646.047	70.2013	0.153655	0.153655		90.9317	0.0412848	1.04128		80.0289	0.0967529	2.09675		88.4727	0.0531906	3.05319		78.1839	0.106883	4.10688		69.448	0.15834	5.15834		64.261	0.192052	5.19205
647.976	70.1817	0.153776	0.153776		90.9348	0.0412698	1.04127		80.1381	0.0961611	2.09616		88.4985	0.0530639	3.05306		78.0719	0.107505	4.10751		69.45	0.158328	5.15833		64.545	0.190137	5.19014
649.904	70.171	0.153842	0.153842		90.904	0.0414168	1.04142		80.1053	0.0963385	2.09634		88.4817	0.0531465	3.05315		77.9632	0.10811	4.10811		69.3619	0.158879	5.15888		64.8438	0.188132	5.18813
651.832	70.1161	0.154182	0.154182		90.8416	0.0417154	1.04172		79.9001	0.0974528	2.09745		88.4488	0.0533079	3.05331		77.8522	0.108729	4.10873		69.2608	0.159513	5.15951		65.1523	0.18607	5.18607
653.761	70.0785	0.154415	0.154415		90.7806	0.0420067	1.04201		79.6382	0.0988787	2.09888		88.3637	0.0537262	3.05373		77.7544	0.109275	4.10928		69.1174	0.160412	5.16041		65.4778	0.183906	5.18391
655.689	70.1796	0.153789	0.153789		90.6315	0.0427209	1.04272		79.4983	0.099642	2.09964		88.2824	0.0541258	3.05413		77.7266	0.10943	4.10943		69.1112	0.160452	5.16045		65.8282	0.181588	5.18159
657.618	70.4057	0.152392	0.152392		90.4658	0.0435155	1.04352		79.5511	0.0993539	2.09935		88.1366	0.0548439	3.05484		77.6967	0.109597	4.1096		68.9121	0.161705	5.1617		66.2024	0.179126	5.17913
659.546	70.5203	0.151686	0.151686		90.3709	0.0439712	1.04397		79.6307	0.0989197	2.09892		87.9854	0.0555894	3.05559		77.7409	0.109351	4.10935		68.6588	0.163304	5.1633		66.6153	0.176426	5.17643
661.475	70.5639	0.151417	0.151417		90.2413	0.0445946	1.04459		79.571	0.0992452	2.09925		87.867	0.0561743	3.05617		77.8257	0.108877	4.10888		68.4476	0.164642	5.16464		67.0255	0.17376	5.17376
663.403	70.6867	0.150663	0.150663		90.1062	0.0452454	1.04525		79.5486	0.0993675	2.09937		87.8207	0.0564032	3.0564		77.9012	0.108456	4.10846		68.2501	0.165897	5.1659		67.4415	0.171073	5.17107
665.332	70.8513	0.149652	0.149652		90.0446	0.0455426	1.04554		79.6403	0.098867	2.09887		87.8597	0.0562103	3.05621		77.9363	0.10826	4.10826		68.1871	0.166298	5.1663		67.8958	0.168157	5.16816
667.26	70.8685	0.149547	0.149547		90.0139	0.0456907	1.04569		79.6392	0.0988732	2.09887		87.9175	0.0559246	3.05592		77.9121	0.108395	4.1084		68.2524	0.165882	5.16588		68.3751	0.165102	5.1651
669.189	70.8253	0.149812	0.149812		89.9869	0.0458207	1.04582		79.4382	0.0999708	2.09997		87.9095	0.0559641	3.05596		77.8672	0.108646	4.10865		68.2577	0.165848	5.16585		68.775	0.162569	5.16257
671.117	70.7545	0.150246	0.150246		89.9928	0.0457924	1.04579		79.2104	0.101218	2.10122		87.8508	0.0562542	3.05625		77.8728	0.108614	4.10861		68.205	0.166184	5.16618		69.1296	0.160336	5.16034
673.046	70.6731	0.150746	0.150746		90.042	0.045555	1.04556		79.1475	0.101563	2.10156		87.7539	0.0567336	3.05673		77.8618	0.108676	4.10868		68.3309	0.165383	5.16538		69.5535	0.157681	5.15768
674.975	70.6307	0.151007	0.151007		90.1162	0.0451973	1.0452		79.1209	0.101709	2.10171		87.6896	0.0570519	3.05705		77.7975	0.109034	4.10903		68.5981	0.163688	5.16369		70.0398	0.154655	5.15466
676.903	70.577	0.151337	0.151337		90.1714	0.0449313	1.04493		78.9795	0.102486	2.10249		87.6954	0.0570231	3.05702		77.7538	0.109278	4.10928		68.7374	0.162807	5.16281		70.4832	0.151915	5.15191
678.832	70.4588	0.152065	0.152065		90.2761	0.0444273	1.04443		78.8125	0.103405	2.10341		87.7978	0.0565163	3.05652		77.6914	0.109627	4.10963		68.7255	0.162882	5.16288		70.8509	0.149655	5.14965
680.76	70.2729	0.153212	0.153212		90.3679	0.043986	1.04399		78.6721	0.104179	2.10418		87.9129	0.0559473	3.05595		77.6438	0.109893	4.10989		68.7792	0.162543	5.16254		71.194	0.147557	5.14756
682.688	70.2625	0.153276	0.153276		90.4046	0.0438094	1.04381		78.732	0.103849	2.10385		87.9702	0.0556644	3.05566		77.6963	0.109599	4.1096		68.9112	0.16171	5.16171		71.4911	0.145748	5.14575
684.617	70.2999	0.153045	0.153045		90.5198	0.0432563	1.04326		78.9221	0.102801	2.1028		87.9429	0.0557992	3.0558		77.7539	0.109278	4.10928		68.7969	0.162431	5.16243		71.695	0.144511	5.14451
686.545	70.1416	0.154024	0.154024		90.6318	0.0427195	1.04272		79.0378	0.102165	2.10217		87.9218	0.0559033	3.0559		77.8506	0.108738	4.10874		68.7396	0.162793	5.16279		71.8608	0.143508	5.14351
688.474	69.924	0.155374	0.155374		90.6336	0.0427107	1.04271		79.0167	0.102281	2.10228		87.8838	0.0560913	3.05609		77.9124	0.108394	4.10839		68.752	0.162715	5.16271		71.977	0.142806	5.14281
690.403	69.729	0.156587	0.156587		90.5815	0.0429607	1.04296		79.0134	0.102299	2.1023		87.8503	0.0562568	3.05626		77.8942	0.108495	4.1085		68.8218	0.162274	5.16227		72.0432	0.142407	5.14241
692.331	69.5171	0.157909	0.157909		90.5387	0.0431659	1.04317		79.0472	0.102113	2.10211		87.7284	0.0568599	3.05686		77.8073	0.10898	4.10898		68.9509	0.16146	5.16146		72.0496	0.142368	5.14237
694.26	69.2938	0.159306	0.159306		90.5313	0.0432014	1.0432		78.9922	0.102416	2.10242		87.5042	0.057971	3.05797		77.704	0.109556	4.10956		68.9783	0.161288	5.16129		72.0677	0.142259	5.14226
696.188	69.1244	0.160369	0.160369		90.5364	0.0431768	1.04318		78.9638	0.102572	2.10257		87.2731	0.0591195	3.05912		77.6809	0.109686	4.10969		68.9642	0.161376	5.16138		72.1119	0.141993	5.14199
698.116	69.0006	0.161147	0.161147		90.4953	0.0433739	1.04337		79.0012	0.102366	2.10237		87.1972	0.0594977	3.0595		77.7011	0.109573	4.10957		69.0047	0.161121	5.16112		72.2083	0.141413	5.14141
700.045	68.8684	0.16198	0.16198		90.4295	0.0436901	1.04369		79.0569	0.10206	2.10206		87.2213	0.0593772	3.05938		77.653	0.109842	4.10984		69.1524	0.160193	5.16019		72.4963	0.139684	5.13968
701.973	68.7956	0.162439	0.162439		90.3805	0.0439251	1.04393		79.0858	0.101901	2.1019		87.3015	0.0589785	3.05898		77.5784	0.110259	4.11026		69.355	0.158922	5.15892		72.901	0.137267	5.13727
703.902	68.7274	0.16287	0.16287		90.3144	0.0442431	1.04424		79.1305	0.101656	2.10166		87.3843	0.0585663	3.05857		77.562	0.110351	4.11035		69.5148	0.157922	5.15792		73.3789	0.134429	5.13443
705.83	68.6367	0.163444	0.163444		90.2982	0.0443211	1.04432		79.1286	0.101667	2.10167		87.4828	0.0580774	3.05808		77.5535	0.110398	4.1104		69.5533	0.157682	5.15768		74.0014	0.13076	5.13076
707.759	68.6193	0.163554	0.163554		90.3465	0.0440885	1.04409		78.9861	0.102449	2.10245		87.5686	0.0576517	3.05765		77.5585	0.110371	4.11037		69.5252	0.157858	5.15786		74.7617	0.126321	5.12632
709.687	68.7218	0.162906	0.162906		90.3867	0.0438954	1.0439		78.8111	0.103413	2.10341		87.6663	0.0571672	3.05717		77.5854	0.11022	4.11022		69.4644	0.158238	5.15824		75.646	0.121214	5.12121
711.616	68.8169	0.162305	0.162305		90.4094	0.0437862	1.04379		78.6568	0.104264	2.10426		87.7849	0.05658	3.05658		77.5956	0.110163	4.11016		69.4571	0.158283	5.15828		76.6077	0.115728	5.11573
713.544	68.8283	0.162233	0.162233		90.3878	0.0438904	1.04389		78.5119	0.105064	2.10506		87.8627	0.0561956	3.0562		77.5883	0.110204	4.1102		69.5278	0.157842	5.15784		77.5694	0.110309	5.11031
715.473	68.7865	0.162497	0.162497		90.3369	0.0441348	1.04413		78.3346	0.106047	2.10605		87.9531	0.0557491	3.05575		77.5429	0.110458	4.11046		69.5316	0.157818	5.15782		78.4926	0.105171	5.10517
717.401	68.7085	0.16299	0.16299		90.3245	0.0441945	1.04419		78.2441	0.106548	2.10655		87.976	0.0556359	3.05564		77.4843	0.110787	4.11079		69.5552	0.15767	5.15767		79.3645	0.100374	5.10037
719.33	68.7024	0.163028	0.163028		90.3623	0.0440125	1.04401		78.2452	0.106542	2.10654		87.8803	0.0561084	3.05611		77.4572	0.110938	4.11094		69.552	0.157691	5.15769		80.2201	0.0957166	5.09572
721.258	68.8297	0.162224	0.162224		90.4462	0.0436098	1.04361		78.3644	0.105881	2.10588		87.8435	0.0562902	3.05629		77.4922	0.110742	4.11074		69.4024	0.158626	5.15863		81.0532	0.09123	5.09123
723.187	68.9482	0.161477	0.161477		90.4909	0.0433952	1.0434		78.5965	0.104597	2.1046		87.9424	0.0558018	3.0558		77.5399	0.110475	4.11047		69.3471	0.158972	5.15897		81.8099	0.0871939	5.08719
725.115	69.0182	0.161036	0.161036		90.5061	0.0433221	1.04332		78.8952	0.10295	2.10295		88.1002	0.0550233	3.05502		77.5653	0.110333	4.11033		69.3816	0.158755	5.15876		82.4585	0.0837646	5.08376
727.044	69.0461	0.160861	0.160861		90.5323	0.0431963	1.0432		79.2345	0.101086	2.10109		88.2479	0.0542956	3.0543		77.608	0.110093	4.11009		69.4366	0.158412	5.15841		83.0064	0.0808883	5.08089
728.972	69.0391	0.160905	0.160905		90.5568	0.0430791	1.04308		79.6474	0.0988283	2.09883		88.4126	0.0534858	3.05349		77.6915	0.109627	4.10963		69.5253	0.157857	5.15786		83.4478	0.0785851	5.07859
730.901	68.9806	0.161273	0.161273		90.54	0.0431595	1.04316		79.9721	0.0970612	2.09706		88.5494	0.0528143	3.05281		77.8436	0.108777	4.10878		69.6238	0.157242	5.15724		83.8029	0.0767412	5.07674
732.829	68.9324	0.161577	0.161577		90.5382	0.0431684	1.04317		80.0434	0.0966746	2.09667		88.6941	0.0521055	3.05211		78.0169	0.107811	4.10781		69.6594	0.15702	5.15702		84.0747	0.0753349	5.07533
734.758	68.9729	0.161321	0.161321		90.5661	0.0430344	1.04303		79.946	0.097203	2.0972		88.8433	0.0513754	3.05138		78.1411	0.107121	4.10712		69.7189	0.15665	5.15665		84.2653	0.0743511	5.07435
736.686	69.0905	0.160582	0.160582		90.5654	0.0430376	1.04304		79.8222	0.0978761	2.09788		88.9913	0.0506522	3.05065		78.2605	0.106457	4.10646		69.8544	0.155806	5.15581		84.437	0.0734672	5.07347
738.615	69.1694	0.160086	0.160086		90.5581	0.0430727	1.04307		79.692	0.0985854	2.09859		89.1151	0.0500485	3.05005		78.3306	0.106069	4.10607		70.0592	0.154535	5.15453		84.5656	0.0728062	5.07281
740.543	69.1432	0.16025	0.16025		90.5216	0.0432477	1.04325		79.6556	0.0987839	2.09878		89.2178	0.0495486	3.04955		78.3549	0.105934	4.10593		70.2052	0.153631	5.15363		84.6536	0.0723545	5.07235
742.472	69.0814	0.160639	0.160639		90.4304	0.0436858	1.04369		79.6089	0.0990381	2.09904		89.3189	0.0490565	3.04906		78.3652	0.105877	4.10588		70.2501	0.153353	5.15335		84.6732	0.0722542	5.07225
744.4	69.0287	0.16097	0.16097		90.3533	0.0440559	1.04406		79.5404	0.0994124	2.09941		89.324	0.0490316	3.04903		78.3653	0.105876	4.10588		70.3331	0.15284	5.15284		84.6659	0.0722916	5.07229
746.329	68.9787	0.161285	0.161285		90.267	0.044471	1.04447		79.5251	0.0994956	2.0995		89.2944	0.0491758	3.04918		78.3586	0.105913	4.10591		70.3365	0.152819	5.15282		84.7201	0.0720134	5.07201
748.257	68.9181	0.161667	0.161667		90.1753	0.0449124	1.04491		79.5325	0.0994554	2.09946		89.3158	0.0490716	3.04907		78.3292	0.106076	4.10608		70.1258	0.154122	5.15412		84.8128	0.0715384	5.07154
750.186	68.8157	0.162313	0.162313		90.1103	0.0452258	1.04523		79.4789	0.0997479	2.09975		89.3515	0.0488981	3.0489		78.2186	0.10669	4.10669		69.907	0.155479	5.15548		84.945	0.0708621	5.07086
752.114	68.6809	0.163164	0.163164		90.0987	0.0452817	1.04528		79.4819	0.0997318	2.09973		89.315	0.0490758	3.04908		78.0955	0.107374	4.10737		69.6967	0.156788	5.15679		85.0495	0.070328	5.07033
754.043	68.5688	0.163873	0.163873		90.0524	0.0455046	1.0455		79.5856	0.0991653	2.09917		89.3218	0.0490425	3.04904		78.0352	0.107709	4.10771		69.433	0.158434	5.15843		85.0574	0.0702878	5.07029
755.971	68.4239	0.164792	0.164792		89.996	0.0457767	1.04578		79.6941	0.0985736	2.09857		89.4082	0.0486225	3.04862		77.9944	0.107936	4.10794		69.1708	0.160077	5.16008		85.0769	0.0701882	5.07019
757.9	68.2221	0.166075	0.166075		89.9929	0.0457918	1.04579		79.6677	0.0987177	2.09872		89.5086	0.0481351	3.04814		77.9752	0.108044	4.10804		68.9984	0.161161	5.16116		85.169	0.0697183	5.06972
759.828	68.0805	0.166978	0.166978		90.0423	0.0455532	1.04555		79.6059	0.0990547	2.09905		89.5714	0.0478306	3.04783		77.9952	0.107932	4.10793		68.9081	0.16173	5.16173		85.344	0.0688271	5.06883
761.757	68.0272	0.167317	0.167317		90.1003	0.045274	1.04527		79.5894	0.0991447	2.09914		89.5715	0.0478303	3.04783		78.0495	0.10763	4.10763		68.8823	0.161892	5.16189		85.6008	0.0675224	5.06752
763.685	68.0254	0.167329	0.167329		90.146	0.0450535	1.04505		79.6472	0.0988294	2.09883		89.569	0.0478425	3.04784		78.1445	0.107102	4.1071		68.8982	0.161792	5.16179		85.9205	0.0659033	5.0659
765.614	68.0401	0.167235	0.167235		90.18	0.0448895	1.04489		79.7493	0.0982731	2.09827		89.6303	0.0475451	3.04755		78.2206	0.106679	4.10668		68.8752	0.161937	5.16194		86.3323	0.0638267	5.06383
767.542	67.9996	0.167494	0.167494		90.1662	0.0449565	1.04496		79.8991	0.0974582	2.09746		89.7323	0.0470513	3.04705		78.3025	0.106224	4.10622		68.8423	0.162145	5.16214		86.8214	0.0613734	5.06137
769.471	67.8889	0.168202	0.168202		90.0801	0.0453713	1.04537		79.9531	0.0971644	2.09716		89.7935	0.0467551	3.04676		78.3555	0.105931	4.10593		68.8439	0.162134	5.16213		87.3369	0.0588023	5.0588
771.399	67.7942	0.168808	0.168808		89.9514	0.0459921	1.04599		80.0155	0.0968257	2.09683		89.7966	0.0467401	3.04674		78.355	0.105933	4.10593		68.8792	0.161912	5.16191		87.8897	0.0560622	5.05606
773.328	67.7083	0.169358	0.169358		89.787	0.0467864	1.04679		80.1338	0.0961842	2.09618		89.7495	0.0469681	3.04697		78.3118	0.106173	4.10617		68.8359	0.162185	5.16219		88.5927	0.0526021	5.0526
775.256	67.6386	0.169806	0.169806		89.6001	0.0476913	1.04769		80.116	0.096281	2.09628		89.6976	0.0472189	3.04722		78.2248	0.106656	4.10666		68.7304	0.162851	5.16285		89.4376	0.04848	5.04848
777.185	67.6148	0.169958	0.169958		89.3975	0.0486747	1.04867		79.9519	0.097171	2.09717		89.5845	0.0477673	3.04777		78.1076	0.107307	4.10731		68.6414	0.163414	5.16341		90.2972	0.0443257	5.04433
779.113	67.6099	0.16999	0.16999		89.1546	0.049856	1.04986		79.7541	0.0982469	2.09825		89.4344	0.0484956	3.0485		77.997	0.107922	4.10792		68.5068	0.164266	5.16427		91.1156	0.0404074	5.04041
781.042	67.5719	0.170234	0.170234		88.8504	0.0513409	1.05134		79.5563	0.0993256	2.09933		89.3177	0.0490627	3.04906		77.8856	0.108543	4.10854		68.2726	0.165753	5.16575		91.8797	0.0367806	5.03678
782.97	67.4497	0.17102	0.17102		88.5408	0.0528568	1.05286		79.2772	0.100851	2.10085		89.2083	0.0495949	3.04959		77.6991	0.109584	4.10958		68.0596	0.167111	5.16711		92.6384	0.033209	5.03321
784.899	67.2466	0.17233	0.17233		88.2263	0.0544018	1.0544		78.9292	0.102762	2.10276		89.0338	0.050445	3.05045		77.4374	0.111049	4.11105		67.8317	0.168567	5.16857		93.3808	0.0297423	5.02974
786.827	67.0454	0.173631	0.173631		87.8894	0.0560633	1.05606		78.6347	0.104386	2.10439		88.7523	0.0518202	3.05182		77.1646	0.112582	4.11258		67.5299	0.170504	5.1705		94.0328	0.0267207	5.02672
788.756	66.8138	0.175134	0.175134		87.5134	0.0579256	1.05793		78.4075	0.105643	2.10564		88.3823	0.0536346	3.05363		76.8487	0.114363	4.11436		67.2149	0.172535	5.17253		94.5753	0.0242222	5.02422
790.684	66.5635	0.176764	0.176764		87.1141	0.0599118	1.05991		78.17	0.10696	2.10696		88.0454	0.0552934	3.05529		76.4908	0.116391	4.11639		66.9086	0.174518	5.17452		95.0653	0.0219779	5.02198
792.613	66.3175	0.178372	0.178372		86.7376	0.0617925	1.06179		77.8982	0.108472	2.10847		87.7514	0.0567457	3.05675		76.1736	0.118196	4.1182		66.4922	0.177229	5.17723		95.54	0.0198148	5.01981
794.541	65.8909	0.181174	0.181174		86.2479	0.0642515	1.06425		77.5277	0.110543	2.11054		87.3422	0.0587761	3.05878		75.7839	0.120423	4.12042		65.9973	0.180474	5.18047		95.9196	0.0180928	5.01809
796.47	65.1233	0.186264	0.186264		85.4106	0.0684882	1.06849		76.8401	0.114412	2.11441		86.5216	0.0628757	3.06288		75.0684	0.124543	4.12454		65.1813	0.185877	5.18588		96.2808	0.0164604	5.01646
798.398	64.0653	0.193377	0.193377		84.174	0.074822	1.07482		75.9079	0.119713	2.11971		85.2108	0.0695052	3.06951		73.9735	0.130924	4.13092		63.9568	0.194113	5.19411		96.6311	0.014883	5.01488
800.327	62.873	0.201536	0.201536		82.6629	0.0826896	1.08269		74.7954	0.126125	2.12612		83.5972	0.0778083	3.07781		72.6359	0.138848	4.13885		62.5488	0.203781	5.20378		96.9769	0.0133315	5.01333
802.255	61.7722	0.209207	0.209207		81.1222	0.0908602	1.09086		73.6732	0.13269	2.13269		82.0218	0.0860706	3.08607		71.3257	0.146754	4.14675		61.1962	0.213275	5.21328		97.2857	0.0119512	5.01195
804.184	60.9424	0.21508	0.21508		79.831	0.0978285	1.09783		72.726	0.13831	2.13831		80.7274	0.0929789	3.09298		70.2919	0.153094	4.15309		60.0524	0.221469	5.22147		97.5242	0.0108875	5.01089
806.112	60.4246	0.218787	0.218787		78.9014	0.102915	1.10292		72.115	0.141975	2.14197		79.8736	0.0975969	3.0976		69.617	0.157285	4.15728		59.2375	0.227403	5.2274		97.7911	0.00970067	5.0097
808.041	60.2383	0.220128	0.220128		78.4042	0.105661	1.10566		71.9238	0.143128	2.14313		79.5233	0.0995059	3.09951		69.3152	0.159172	4.15917		58.9088	0.22982	5.22982		98.0949	0.00835348	5.00835
809.969	60.3718	0.219166	0.219166		78.3912	0.105733	1.10573		72.1152	0.141973	2.14197		79.6668	0.0987224	3.09872		69.393	0.158684	4.15868		59.0953	0.228447	5.22845		98.3721	0.00712801	5.00713
811.898	60.7284	0.216608	0.216608		78.8105	0.103416	1.10342		72.629	0.13889	2.13889		80.2165	0.0957362	3.09574		69.8256	0.155985	4.15599		59.6654	0.224278	5.22428		98.6452	0.00592404	5.00592
813.826	61.3129	0.212448	0.212448		79.6043	0.0990637	1.09906		73.4692	0.133895	2.13389		81.1452	0.0907372	3.09074		70.6032	0.151175	4.15118		60.5409	0.217951	5.21795		98.8846	0.00487121	5.00487
815.755	62.1186	0.206779	0.206779		80.7294	0.0929684	1.09297		74.5505	0.127549	2.12755		82.432	0.0839042	3.0839		71.5884	0.145157	4.14516		61.5914	0.21048	5.21048		99.1208	0.00383533	5.00384
817.683	63.0847	0.200076	0.200076		82.0739	0.0857949	1.08579		75.7319	0.120721	2.12072		83.9794	0.075827	3.07583		72.7399	0.138228	4.13823		62.8037	0.202014	5.20201		99.3405	0.00287357	5.00287
819.612	64.0769	0.193299	0.193299		83.4652	0.0784948	1.07849		76.8959	0.114097	2.1141		85.4635	0.0682191	3.06822		73.9458	0.131087	4.13109		63.9919	0.193875	5.19387		99.4958	0.00219516	5.0022
821.54	64.8127	0.18834	0.18834		84.6038	0.0726099	1.07261		77.7604	0.109241	2.10924		86.5915	0.0625245	3.06252		74.8973	0.125534	4.12553		64.8831	0.187869	5.18787		99.5189	0.00209461	5.00209
823.469	65.2112	0.185678	0.185678		85.3161	0.0689691	1.06897		78.2075	0.106751	2.10675		87.176	0.0596031	3.0596		75.4424	0.122385	4.12238		65.3274	0.184904	5.1849		99.4451	0.00241674	5.00242
825.397	65.5015	0.183749	0.183749		85.7463	0.0667846	1.06678		78.501	0.105125	2.10512		87.3983	0.058497	3.0585		75.7047	0.120877	4.12088		65.4593	0.184028	5.18403		99.2225	0.00338966	5.00339
827.326	65.2793	0.185225	0.185225		85.5576	0.0677416	1.06774		78.1462	0.107092	2.10709		86.8313	0.0613237	3.06132		75.3564	0.12288	4.12288		65.0056	0.187049	5.18705		98.8355	0.00508686	5.00509
829.254	63.6855	0.195959	0.195959		84.0037	0.0757017	1.0757		76.2298	0.117875	2.11788		84.6833	0.0722022	3.0722		73.7673	0.132136	4.13214		63.3509	0.198247	5.19825		98.3245	0.00733817	5.00734
831.183	61.2216	0.213095	0.213095		81.2825	0.0900031	1.09		73.2315	0.135302	2.1353		81.3521	0.0896311	3.08963		71.1915	0.147572	4.14757		60.7203	0.216666	5.21667		97.7462	0.00989998	5.0099
833.111	58.8235	0.230449	0.230449		78.2884	0.106303	1.1063		70.3557	0.152701	2.1527		77.9262	0.108317	3.10832		68.4918	0.164361	4.16436		57.9657	0.236829	5.23683		97.1398	0.012603	5.0126
835.04	56.8976	0.244906	0.244906		75.6352	0.121276	1.12128		68.1154	0.166755	2.16675		75.0051	0.124909	3.12491		66.1988	0.17915	4.17915		55.7029	0.254122	5.25412		96.5344	0.015318	5.01532
836.968	55.5469	0.25534	0.25534		73.6437	0.132864	1.13286		66.5611	0.176779	2.17678		72.8535	0.13755	3.13755		64.5195	0.190309	4.19031		54.0999	0.266804	5.2668		95.9279	0.0180553	5.01806
838.897	54.7862	0.261329	0.261329		72.3943	0.140295	1.1403		65.6892	0.182506	2.18251		71.6465	0.144805	3.14481		63.5338	0.196995	4.197		53.1824	0.274232	5.27423		95.3549	0.0206569	5.02066
840.825	54.6417	0.262476	0.262476		71.9526	0.142954	1.14295		65.5746	0.183265	2.18326		71.4484	0.146008	3.14601		63.3099	0.198528	4.19853		52.9355	0.276253	5.27625		94.8258	0.0230736	5.02307
842.754	55.1105	0.258766	0.258766		72.3791	0.140387	1.14039		66.1721	0.179325	2.17933		72.2463	0.141185	3.14118		63.8114	0.195102	4.1951		53.3877	0.272559	5.27256		94.4128	0.0249693	5.02497
844.682	56.1703	0.250493	0.250493		73.6245	0.132978	1.13298		67.4429	0.171064	2.17106		74.0358	0.130558	3.13056		65.022	0.18694	4.18694		54.6982	0.262027	5.26203		94.096	0.0264289	5.02643
846.611	57.8041	0.238041	0.238041		75.6187	0.121371	1.12137		69.3464	0.158976	2.15898		76.5889	0.115834	3.11583		66.8731	0.174749	4.17475		56.6982	0.246431	5.24643		93.8995	0.0273366	5.02734
848.539	59.9261	0.222384	0.222384		78.2315	0.106618	1.10662		71.8404	0.143631	2.14363		79.7523	0.0982568	3.09826		69.2422	0.159629	4.15963		59.2055	0.227638	5.22764		93.7887	0.0278495	5.02785
850.468	62.3923	0.204869	0.204869		81.2385	0.0902383	1.09024		74.7541	0.126365	2.12636		83.2979	0.0793657	3.07937		71.9616	0.142899	4.1429		62.0917	0.206966	5.20697		93.7283	0.0281291	5.02813
852.396	64.8482	0.188102	0.188102		84.2269	0.074549	1.07455		77.6165	0.110046	2.11005		86.6355	0.0623041	3.0623		74.5568	0.127513	4.12751		64.8256	0.188253	5.18825		93.768	0.0279452	5.02795
854.325	66.341	0.178218	0.178218		86.2471	0.0642558	1.06426		79.3371	0.100524	2.10052		88.6998	0.0520773	3.05208		76.1457	0.118355	4.11835		66.5974	0.176543	5.17654		93.9396	0.0271512	5.02715
856.253	66.4583	0.177451	0.177451		86.8034	0.0614633	1.06146		79.4497	0.0999075	2.09991		89.1505	0.0498761	3.04988		76.4414	0.116672	4.11667		67.1721	0.172811	5.17281		94.1869	0.0260095	5.02601
858.182	66.1837	0.179249	0.179249		86.6986	0.0619879	1.06199		79.0762	0.101954	2.10195		88.9671	0.0507705	3.05077		76.2501	0.11776	4.11776		67.1617	0.172878	5.17288		94.4698	0.0247072	5.02471
860.11	66.0959	0.179826	0.179826		86.6349	0.0623072	1.06231		79.0203	0.102261	2.10226		88.913	0.0510346	3.05103		76.2117	0.117978	4.11798		67.2113	0.172557	5.17256		94.7618	0.0233665	5.02337
862.039	66.1194	0.179671	0.179671		86.6541	0.062211	1.06221		79.1127	0.101754	2.10175		88.9211	0.0509953	3.051		76.288	0.117543	4.11754		67.4359	0.171109	5.17111		95.0349	0.0221167	5.02212
863.967	66.1775	0.17929	0.17929		86.7269	0.0618462	1.06185		79.161	0.101489	2.10149		88.9516	0.0508462	3.05085		76.3525	0.117177	4.11718		67.6462	0.169756	5.16976		95.2726	0.0210322	5.02103
865.896	66.2026	0.179125	0.179125		86.7834	0.0615632	1.06156		79.1603	0.101492	2.10149		89.0044	0.0505886	3.05059		76.419	0.116799	4.1168		67.7281	0.169231	5.16923		95.4932	0.0200277	5.02003
867.824	66.2116	0.179066	0.179066		86.8304	0.0613281	1.06133		79.1443	0.101581	2.10158		89.0576	0.050329	3.05033		76.5091	0.116287	4.11629		67.7599	0.169027	5.16903		95.6692	0.0192277	5.01923
869.753	66.212	0.179063	0.179063		86.9273	0.0608439	1.06084		79.0755	0.101958	2.10196		89.1401	0.049927	3.04993		76.5743	0.115917	4.11592		67.7693	0.168967	5.16897		95.8378	0.0184633	5.01846
871.681	66.2065	0.1791	0.1791		87.0521	0.0602205	1.06022		78.9655	0.102563	2.10256		89.2762	0.0492644	3.04926		76.6449	0.115517	4.11552		67.8167	0.168663	5.16866		95.9678	0.0178746	5.01787
873.61	66.2139	0.179051	0.179051		87.1566	0.0596999	1.0597		78.8947	0.102952	2.10295		89.3286	0.0490093	3.04901		76.7271	0.115051	4.11505		67.8692	0.168327	5.16833		95.9876	0.0177847	5.01778
875.538	66.2129	0.179058	0.179058		87.2458	0.0592554	1.05926		78.8528	0.103183	2.10318		89.3301	0.0490022	3.049		76.7921	0.114684	4.11468		67.8731	0.168303	5.1683		95.8439	0.0184357	5.01844
877.467	66.2012	0.179134	0.179134		87.3205	0.0588839	1.05888		78.7235	0.103896	2.1039		89.3391	0.0489583	3.04896		76.8623	0.114286	4.11429		67.8473	0.168467	5.16847		95.5431	0.0198007	5.0198
879.395	66.2047	0.179111	0.179111		87.4078	0.0584498	1.05845		78.5011	0.105124	2.10512		89.3694	0.0488113	3.04881		76.9126	0.114003	4.114		67.7819	0.168887	5.16889		95.1266	0.0216981	5.0217
881.324	66.2719	0.178671	0.178671		87.4793	0.0580948	1.05809		78.2882	0.106304	2.1063		89.4366	0.0484847	3.04848		76.9249	0.113933	4.11393		67.7369	0.169175	5.16917		94.5446	0.0243635	5.02436
883.252	66.3767	0.177984	0.177984		87.5	0.0579918	1.05799		78.1022	0.107337	2.10734		89.4304	0.0485146	3.04851		76.9385	0.113856	4.11386		67.6926	0.169459	5.16946		93.775	0.0279132	5.02791
885.181	66.2842	0.17859	0.17859		87.2761	0.0591046	1.0591		77.7337	0.109391	2.10939		89.1241	0.050005	3.05001		76.8024	0.114625	4.11463		67.4076	0.171291	5.17129		92.8458	0.0322378	5.03224
887.109	65.7882	0.181852	0.181852		86.5478	0.0627439	1.06274		76.9266	0.113923	2.11392		88.3402	0.0538417	3.05384		76.2634	0.117684	4.11768		66.7211	0.175736	5.17574		91.7952	0.0371798	5.03718
889.038	64.9053	0.18772	0.18772		85.327	0.0689135	1.06891		75.6535	0.121171	2.12117		87.0404	0.0602794	3.06028		75.2561	0.123458	4.12346		65.651	0.182759	5.18276		90.6791	0.042493	5.04249
890.966	63.8654	0.194735	0.194735		83.8365	0.0765671	1.07657		74.224	0.129456	2.12946		85.4862	0.0681038	3.0681		74.0081	0.130721	4.13072		64.3423	0.191503	5.1915		89.5415	0.0479757	5.04798
892.895	62.8807	0.201482	0.201482		82.372	0.0842204	1.08422		72.8962	0.137295	2.1373		83.9885	0.0757804	3.07578		72.8233	0.13773	4.13773		63.0683	0.200189	5.20019		88.4722	0.0531931	5.05319
894.823	62.1317	0.206686	0.206686		81.2295	0.0902862	1.09029		71.8568	0.143532	2.14353		82.8193	0.0818684	3.08187		71.8917	0.143321	4.14332		62.0783	0.20706	5.20706		87.5422	0.0577823	5.05778
896.752	61.7175	0.209591	0.209591		80.5255	0.0940668	1.09407		71.2566	0.147175	2.14717		82.1264	0.0855171	3.08552		71.2887	0.146979	4.14698		61.4606	0.211403	5.2114		86.7393	0.0617842	5.06178
898.68	61.6175	0.210296	0.210296		80.2653	0.0954719	1.09547		71.0628	0.148358	2.14836		81.914	0.086642	3.08664		71.0653	0.148343	4.14834		61.3009	0.212533	5.21253		85.9989	0.0655071	5.06551
900.609	61.7811	0.209144	0.209144		80.4594	0.094423	1.09442		71.2349	0.147307	2.14731		82.1482	0.085402	3.0854		71.2084	0.147469	4.14747		61.5527	0.210753	5.21075		85.2934	0.0690846	5.06908
902.537	62.2021	0.206195	0.206195		81.1272	0.0908333	1.09083		71.7755	0.144024	2.14402		82.8402	0.0817591	3.08176		71.7071	0.144438	4.14444		62.1949	0.206245	5.20625		84.6337	0.0724565	5.07246
904.466	62.896	0.201377	0.201377		82.2102	0.0850745	1.08507		72.6114	0.138995	2.139		83.9399	0.0760316	3.07603		72.5283	0.139492	4.13949		63.1976	0.199299	5.1993		83.9808	0.0758203	5.07582
906.394	63.7989	0.195187	0.195187		83.6278	0.0776491	1.07765		73.692	0.132579	2.13258		85.4031	0.0685265	3.06853		73.6031	0.133104	4.1331		64.4676	0.190659	5.19066		83.232	0.0797097	5.07971
908.323	64.8361	0.188183	0.188183		85.2115	0.0695017	1.0695		74.9913	0.124989	2.12499		87.0148	0.0604071	3.06041		74.8405	0.125863	4.12586		65.8513	0.181436	5.18144		82.388	0.0841363	5.08414
910.251	65.8382	0.181522	0.181522		86.7142	0.0619097	1.06191		76.2994	0.117479	2.11748		88.4508	0.0532981	3.0533		76.0338	0.118993	4.11899		67.1297	0.173085	5.17309		81.5192	0.0887401	5.08874
912.18	66.4981	0.17719	0.17719		87.8294	0.0563603	1.05636		77.2708	0.111985	2.11198		89.444	0.048449	3.04845		76.8803	0.114185	4.11418		68.0383	0.167246	5.16725		80.5944	0.0936954	5.0937
914.108	66.7465	0.175572	0.175572		88.4077	0.05351	1.05351		77.7229	0.109451	2.10945		89.8876	0.0463003	3.0463		77.2248	0.112243	4.11224		68.4999	0.16431	5.16431		79.6438	0.0988478	5.09885
916.037	66.7398	0.175615	0.175615		88.545	0.052836	1.05284		77.8183	0.108918	2.10892		89.8745	0.0463637	3.04636		77.1873	0.112454	4.11245		68.5722	0.163852	5.16385		78.764	0.103672	5.10367
917.965	66.6548	0.176168	0.176168		88.4888	0.0531117	1.05311		77.8337	0.108832	2.10883		89.6822	0.0472936	3.04729		77.0661	0.113137	4.11314		68.476	0.164462	5.16446		77.9519	0.108173	5.10817
919.894	66.5998	0.176527	0.176527		88.4283	0.053409	1.05341		77.8788	0.108581	2.10858		89.4828	0.0482603	3.04826		76.9839	0.1136	4.1136		68.3836	0.165048	5.16505		77.2396	0.11216	5.11216
921.822	66.6294	0.176334	0.176334		88.4342	0.0533797	1.05338		77.9548	0.108157	2.10816		89.3698	0.0488092	3.04881		76.9281	0.113915	4.11391		68.3078	0.16553	5.16553		76.6941	0.115238	5.11524
923.751	66.7101	0.175808	0.175808		88.4584	0.053261	1.05326		78.025	0.107767	2.10777		89.3571	0.0488712	3.04887		76.873	0.114226	4.11423		68.2507	0.165893	5.16589		76.2673	0.117661	5.11766
925.679	66.7424	0.175598	0.175598		88.4771	0.0531691	1.05317		78.0683	0.107525	2.10753		89.3071	0.049114	3.04911		76.7863	0.114716	4.11472		68.2288	0.166032	5.16603		75.9535	0.119452	5.11945
927.608	66.6132	0.17644	0.17644		88.3907	0.0535934	1.05359		77.9689	0.108079	2.10808		89.0886	0.0501779	3.05018		76.6076	0.115728	4.11573		68.1856	0.166307	5.16631		75.7487	0.120625	5.12062
929.536	66.3423	0.178209	0.178209		88.1262	0.0548949	1.05489		77.7614	0.109236	2.10924		88.6778	0.052185	3.05219		76.3171	0.117378	4.11738		68.0398	0.167237	5.16724		75.597	0.121495	5.1215
931.465	66.0269	0.180279	0.180279		87.7102	0.0569498	1.05695		77.4839	0.110789	2.11079		88.1814	0.0546232	3.05462		75.9325	0.119572	4.11957		67.7333	0.169198	5.1692		75.4369	0.122416	5.12242
933.393	65.6925	0.182484	0.182484		87.2603	0.0591834	1.05918		77.1551	0.112636	2.11264		87.7181	0.0569108	3.05691		75.5082	0.122006	4.12201		67.3348	0.17176	5.17176		75.2074	0.12374	5.12374
935.322	65.3546	0.184724	0.184724		86.8461	0.0612498	1.06125		76.8893	0.114134	2.11413		87.2798	0.0590861	3.05909		75.1074	0.124317	4.12432		66.9198	0.174445	5.17445		74.937	0.125304	5.1253
937.25	65.0849	0.18652	0.18652		86.4766	0.0631014	1.0631		76.7131	0.11513	2.11513		86.8723	0.0611187	3.06112		74.7485	0.126397	4.1264		66.5735	0.176698	5.1767		74.6427	0.127013	5.12701
939.179	64.9095	0.187692	0.187692		86.1861	0.0645629	1.06456		76.5688	0.115948	2.11595		86.5789	0.062588	3.06259		74.4556	0.128103	4.1281		66.3216	0.178345	5.17835		74.2837	0.129106	5.12911
941.107	64.837	0.188177	0.188177		85.9979	0.065512	1.06551		76.4943	0.116371	2.11637		86.4108	0.063432	3.06343		74.2519	0.129292	4.12929		66.1475	0.179487	5.17949		73.8594	0.131594	5.13159
943.036	64.8207	0.188286	0.188286		85.8631	0.0661933	1.06619		76.4992	0.116343	2.11634		86.3097	0.0639405	3.06394		74.151	0.129883	4.12988		66.0118	0.180379	5.18038		73.3389	0.134665	5.13467
944.964	64.8362	0.188183	0.188183		85.7698	0.0666655	1.06667		76.6119	0.115704	2.1157		86.287	0.0640544	3.06405		74.169	0.129777	4.12978		65.943	0.180831	5.18083		72.7007	0.138461	5.13846
946.893	64.9063	0.187713	0.187713		85.7731	0.0666488	1.06665		76.8148	0.114555	2.11455		86.3519	0.0637279	3.06373		74.2871	0.129087	4.12909		65.9401	0.180851	5.18085		71.8974	0.143287	5.14329
948.821	65.0491	0.186759	0.186759		85.8639	0.0661894	1.06619		77.0158	0.11342	2.11342		86.529	0.0628385	3.06284		74.4788	0.127967	4.12797		65.9895	0.180525	5.18052		70.9164	0.149253	5.14925
950.75	65.1948	0.185787	0.185787		85.9808	0.0655984	1.0656		77.1804	0.112493	2.11249		86.7368	0.0617965	3.0618		74.6733	0.126835	4.12683		66.032	0.180245	5.18025		69.7704	0.156328	5.15633
952.678	65.2819	0.185208	0.185208		86.0282	0.0653591	1.06536		77.3653	0.111454	2.11145		86.8283	0.0613388	3.06134		74.8098	0.126042	4.12604		66.0858	0.179892	5.17989		68.4858	0.164399	5.1644
954.607	65.2622	0.185338	0.185338		85.9185	0.0659136	1.06591		77.4912	0.110748	2.11075		86.7736	0.0616124	3.06161		74.8688	0.125699	4.1257		66.0515	0.180117	5.18012		67.0516	0.173591	5.17359
956.535	65.171	0.185946	0.185946		85.6197	0.0674265	1.06743		77.5095	0.110645	2.11065		86.5469	0.0627483	3.06275		74.8267	0.125943	4.12594		65.7656	0.182001	5.182		65.4381	0.184169	5.18417
958.464	64.6212	0.189625	0.189625		84.8456	0.0713707	1.07137		77.015	0.113425	2.11342		85.7574	0.0667285	3.06673		74.3361	0.1288	4.1288		64.9422	0.187473	5.18747		63.626	0.196365	5.19637
960.392	62.97	0.200866	0.200866		83.0666	0.0805738	1.08057		75.2686	0.123386	2.12339		83.7803	0.076858	3.07686		72.8697	0.137453	4.13745		63.1902	0.19935	5.19935		61.6251	0.210243	5.21024
962.321	60.304	0.219654	0.219654		80.1242	0.0962361	1.09624		72.3466	0.140582	2.14058		80.4991	0.0942091	3.09421		70.3605	0.152671	4.15267		60.454	0.218575	5.21858		59.4824	0.225612	5.22561
964.249	57.2916	0.241909	0.241909		76.4459	0.116646	1.11665		68.96	0.161403	2.1614		76.5667	0.11596	3.11596		67.2776	0.17213	4.17213		57.1688	0.242841	5.24284		57.2539	0.242195	5.2422
966.178	54.5438	0.263254	0.263254		72.6824	0.138571	1.13857		65.749	0.182111	2.18211		72.7316	0.138277	3.13828		64.1761	0.192627	4.19263		53.8781	0.268588	5.26859		54.9515	0.26002	5.26002
968.106	52.417	0.280528	0.280528		69.4199	0.158516	1.15852		63.2232	0.199123	2.19912		69.5423	0.157751	3.15775		61.5221	0.210969	4.21097		51.0402	0.292088	5.29209		52.5535	0.279398	5.2794
970.035	51.0303	0.292172	0.292172		67.0314	0.173722	1.17372		61.5801	0.210559	2.21056		67.4006	0.171336	3.17134		59.6647	0.224283	4.22428		49.0829	0.30907	5.30907		50.0202	0.300854	5.30085
971.963	50.3989	0.297579	0.297579		65.7659	0.181999	1.182		60.876	0.215554	2.21555		66.5034	0.177156	3.17716		58.7847	0.230736	4.23074		48.1753	0.317176	5.31718		47.396	0.324258	5.32426
973.892	50.5541	0.296244	0.296244		65.7675	0.181989	1.18199		61.0583	0.214255	2.21426		66.9058	0.174536	3.17454		58.9152	0.229772	4.22977		48.339	0.315702	5.3157		44.7092	0.349603	5.3496
975.82	51.5123	0.288089	0.288089		66.9928	0.173972	1.17397		62.1421	0.206614	2.20661		68.5696	0.163868	3.16387		60.0279	0.221647	4.22165		49.5524	0.304935	5.30493		42.0181	0.376563	5.37656
977.749	53.2208	0.273919	0.273919		69.3047	0.159238	1.15924		64.13	0.192939	2.19294		71.3306	0.146724	3.14672		62.0249	0.207434	4.20743		51.6583	0.28686	5.28686		39.3558	0.404992	5.40499
979.677	55.6501	0.254534	0.254534		72.5194	0.139546	1.13955		67.0038	0.1739	2.1739		74.9806	0.125051	3.12505		64.7851	0.188525	4.18853		54.5953	0.262845	5.26285		36.7989	0.434165	5.43417
981.606	58.5594	0.232403	0.232403		76.2348	0.117847	1.11785		70.5045	0.151783	2.15178		78.9934	0.102409	3.10241		67.947	0.16783	4.16783		57.9449	0.236985	5.23699		34.3922	0.463541	5.46354
983.534	61.1755	0.213423	0.213423		79.5603	0.0993035	1.0993		73.6685	0.132718	2.13272		82.2955	0.084624	3.08462		70.676	0.150728	4.15073		60.7702	0.216309	5.21631		32.1644	0.492625	5.49262
985.463	62.0649	0.207154	0.207154		81.1711	0.0905983	1.0906		74.8809	0.125629	2.12563		83.4396	0.0786278	3.07863		71.7832	0.143977	4.14398		61.9397	0.208031	5.20803		30.1363	0.52091	5.52091
987.391	60.7059	0.216769	0.216769		80.3497	0.0950156	1.09502		73.4793	0.133835	2.13383		81.8615	0.08692	3.08692		70.7774	0.150105	4.15011		60.9845	0.21478	5.21478		28.3434	0.547549	5.54755
989.32	58.2052	0.235038	0.235038		77.7577	0.109257	1.10926		70.6311	0.151004	2.151		78.5529	0.104838	3.10484		68.3446	0.165296	4.1653		58.5443	0.232515	5.23252		26.7721	0.572318	5.57232
991.248	55.7628	0.253655	0.253655		74.6348	0.127059	1.12706		67.7071	0.169366	2.16937		74.9982	0.124949	3.12495		65.5563	0.183385	4.18339		55.7277	0.253929	5.25393		25.417	0.594876	5.59488
993.177	53.9202	0.268248	0.268248		71.8386	0.143642	1.14364		65.388	0.184502	2.1845		72.0556	0.142332	3.14233		63.1284	0.199775	4.19977		53.2719	0.273502	5.2735		24.2651	0.615019	5.61502
995.105	52.8082	0.277299	0.277299		69.8642	0.155745	1.15575		63.9468	0.194181	2.19418		70.138	0.154047	3.15405		61.4573	0.211426	4.21143		51.554	0.287738	5.28774		23.278	0.633055	5.63306
997.034	52.4034	0.28064	0.28064		68.9185	0.161664	1.16166		63.4063	0.197868	2.19787		69.4123	0.158563	3.15856		60.6786	0.216965	4.21696		50.8285	0.293893	5.29389		22.4009	0.649735	5.64973
998.962	52.698	0.278206	0.278206		69.0541	0.16081	1.16081		63.7253	0.195688	2.19569		69.8699	0.15571	3.15571		60.7981	0.21611	4.21611		51.0624	0.291899	5.2919		21.6316	0.664911	5.66491
1000.89	53.7201	0.269864	0.269864		70.2387	0.153423	1.15342		64.8301	0.188223	2.18822		71.4446	0.146031	3.14603		61.7824	0.209135	4.20913		52.1749	0.282539	5.28254		20.959	0.67863	5.67863
1002.82	55.4054	0.256448	0.256448		72.3396	0.140624	1.14062		66.737	0.175633	2.17563		74.0406	0.13053	3.13053		63.5655	0.196779	4.19678		54.1324	0.266543	5.26654		20.3567	0.691293	5.69129
1004.75	57.6122	0.239486	0.239486		75.1699	0.123956	1.12396		69.3274	0.159095	2.15909		77.4137	0.111182	3.11118		66.0014	0.180447	4.18045		56.7713	0.245871	5.24587		19.7885	0.703586	5.70359
1006.68	60.221	0.220252	0.220252		78.4579	0.105363	1.10536		72.4116	0.140192	2.14019		81.1755	0.090575	3.09057		68.8178	0.162299	4.1623		59.8451	0.222972	5.22297		19.2941	0.714576	5.71458
1008.61	62.8013	0.202032	0.202032		81.6806	0.0878812	1.08788		75.5234	0.121918	2.12192		84.7251	0.0719881	3.07199		71.5357	0.145477	4.14548		62.8133	0.201949	5.20195		18.8809	0.723977	5.72398
1010.53	64.7057	0.189057	0.189057		84.1691	0.0748474	1.07485		77.8262	0.108874	2.10887		87.3894	0.0585411	3.05854		73.5529	0.1334	4.1334		64.9789	0.187228	5.18723		18.5603	0.731414	5.73141
1012.46	65.4918	0.183813	0.183813		85.4673	0.0681999	1.0682		78.7961	0.103495	2.1035		88.6821	0.0521642	3.05216		74.5002	0.127842	4.12784		65.9891	0.180528	5.18053		18.3389	0.736628	5.73663
1014.39	65.4975	0.183775	0.183775		85.7754	0.0666372	1.06664		78.8557	0.103167	2.10317		88.8881	0.0511564	3.05116		74.6327	0.127071	4.12707		66.1756	0.179302	5.1793		18.2266	0.739295	5.73929
1016.32	65.3268	0.184909	0.184909		85.7075	0.0669814	1.06698		78.6343	0.104388	2.10439		88.7248	0.0519548	3.05195		74.4304	0.128249	4.12825		66.0682	0.180008	5.18001		18.2197	0.739458	5.73946
1018.25	65.2505	0.185416	0.185416		85.6704	0.0671692	1.06717		78.4359	0.105485	2.10549		88.6093	0.0525205	3.05252		74.1877	0.129668	4.12967		65.9764	0.180611	5.18061		18.3385	0.736637	5.73664
1020.18	65.2627	0.185335	0.185335		85.7013	0.0670125	1.06701		78.3059	0.106206	2.10621		88.5836	0.0526465	3.05265		73.9682	0.130955	4.13095		65.9353	0.180882	5.18088		18.5751	0.731069	5.73107
1022.1	65.2814	0.18521	0.18521		85.7789	0.0666193	1.06662		78.1971	0.10681	2.10681		88.5749	0.0526894	3.05269		73.7571	0.132196	4.1322		65.9451	0.180817	5.18082		18.9209	0.723058	5.72306
1024.03	65.2789	0.185227	0.185227		85.8629	0.0661943	1.06619		78.0974	0.107363	2.10736		88.4949	0.0530819	3.05308		73.5115	0.133644	4.13364		65.9827	0.18057	5.18057		19.367	0.712937	5.71294
1025.96	65.2881	0.185166	0.185166		85.9287	0.0658619	1.06586		77.9734	0.108053	2.10805		88.378	0.0536559	3.05366		73.272	0.135062	4.13506		66.0127	0.180372	5.18037		19.9205	0.700699	5.7007
1027.89	65.3204	0.184951	0.184951		85.9601	0.0657031	1.0657		77.7442	0.109332	2.10933		88.2253	0.0544067	3.05441		73.0838	0.136179	4.13618		66.0236	0.180301	5.1803		20.552	0.687146	5.68715
1029.82	65.3214	0.184944	0.184944		85.9423	0.065793	1.06579		77.4368	0.111052	2.11105		88.0701	0.0551713	3.05517		72.9054	0.13724	4.13724		66.0471	0.180146	5.18015		21.2321	0.673008	5.67301
1031.75	65.2036	0.185728	0.185728		85.8675	0.0661713	1.06617		77.0566	0.11319	2.11319		87.8331	0.0563416	3.05634		72.6979	0.138478	4.13848		65.9854	0.180552	5.18055		21.9555	0.658457	5.65846
1033.67	65.0295	0.18689	0.18689		85.6961	0.0670391	1.06704		76.6619	0.11542	2.11542		87.4673	0.058154	3.05815		72.4511	0.139955	4.13996		65.7511	0.182097	5.1821		22.7359	0.643287	5.64329
1035.6	64.8435	0.188133	0.188133		85.4186	0.0684476	1.06845		76.2792	0.117594	2.11759		87.0561	0.0602009	3.0602		72.1823	0.141569	4.14157		65.416	0.184316	5.18432		23.5477	0.628052	5.62805
1037.53	64.6561	0.18939	0.18939		85.0804	0.0701705	1.07017		75.9196	0.119646	2.11965		86.6351	0.0623059	3.06231		71.9291	0.143096	4.1431		65.0442	0.186791	5.18679		24.4227	0.612207	5.61221
1039.46	64.4894	0.190512	0.190512		84.742	0.0719014	1.0719		75.6429	0.121232	2.12123		86.1794	0.0645967	3.0646		71.7424	0.144224	4.14422		64.6997	0.189098	5.1891		25.3461	0.596088	5.59609
1041.39	64.3712	0.191308	0.191308		84.4747	0.0732733	1.07327		75.4439	0.122376	2.12238		85.7879	0.0665738	3.06657		71.6649	0.144694	4.14469		64.482	0.190561	5.19056		26.3078	0.579916	5.57992
1043.32	64.3254	0.191618	0.191618		84.3337	0.0739991	1.074		75.2981	0.123216	2.12322		85.5331	0.0678658	3.06787		71.6746	0.144635	4.14463		64.3375	0.191536	5.19154		27.3266	0.563414	5.56341
1045.25	64.3857	0.191211	0.191211		84.3433	0.0739492	1.07395		75.2686	0.123386	2.12339		85.4453	0.0683118	3.06831		71.7727	0.144041	4.14404		64.2892	0.191862	5.19186		28.416	0.546437	5.54644
1047.17	64.5261	0.190265	0.190265		84.4812	0.0732398	1.07324		75.2799	0.123321	2.12332		85.5114	0.0679761	3.06798		71.9352	0.143058	4.14306		64.3679	0.191331	5.19133		29.5537	0.529388	5.52939
1049.1	64.6922	0.189148	0.189148		84.7409	0.0719071	1.07191		75.3682	0.122812	2.12281		85.6486	0.0672797	3.06728		72.1662	0.141666	4.14167		64.5656	0.189999	5.19		30.7602	0.512011	5.51201
1051.03	64.9161	0.187647	0.187647		85.0631	0.0702589	1.07026		75.5183	0.121948	2.12195		85.8434	0.0662932	3.06629		72.4381	0.140033	4.14003		64.8376	0.188173	5.18817		32.0336	0.494394	5.49439
1052.96	65.2009	0.185747	0.185747		85.4313	0.0683831	1.06838		75.6517	0.121181	2.12118		86.1114	0.0649392	3.06494		72.7417	0.138217	4.13822		65.2199	0.18562	5.18562		33.3473	0.476939	5.47694
1054.89	65.4863	0.183849	0.183849		85.8493	0.0662633	1.06626		75.7642	0.120536	2.12054		86.3498	0.0637387	3.06374		73.0612	0.136313	4.13631		65.6061	0.183056	5.18306		34.6318	0.460525	5.46052
1056.82	65.7471	0.182123	0.182123		86.2583	0.0641993	1.0642		75.8273	0.120174	2.12017		86.5566	0.0627	3.0627		73.3614	0.134533	4.13453		65.9365	0.180874	5.18087		35.8302	0.445751	5.44575
1058.75	65.9099	0.18105	0.18105		86.602	0.0624723	1.06247		75.797	0.120348	2.12035		86.6683	0.0621396	3.06214		73.5806	0.133237	4.13324		66.1923	0.179192	5.17919		36.9216	0.432719	5.43272
1060.67	65.9874	0.180539	0.180539		86.8593	0.0611836	1.06118		75.7227	0.120774	2.12077		86.6398	0.0622826	3.06228		73.7325	0.132341	4.13234		66.3397	0.178227	5.17823		37.8283	0.422183	5.42218
1062.6	66.0608	0.180056	0.180056		87.0334	0.0603141	1.06031		75.5982	0.121488	2.12149		86.4767	0.0631006	3.0631		73.8414	0.1317	4.1317		66.4466	0.177527	5.17753		38.4574	0.41502	5.41502
1064.53	66.1253	0.179632	0.179632		87.1356	0.0598046	1.0598		75.3762	0.122766	2.12277		86.2481	0.0642507	3.06425		73.9146	0.13127	4.13127		66.5608	0.176782	5.17678		38.848	0.410631	5.41063
1066.46	66.1668	0.17936	0.17936		87.1737	0.0596145	1.05961		75.1049	0.124332	2.12433		86.0071	0.0654659	3.06547		73.9438	0.131098	4.1311		66.6628	0.176116	5.17612		39.0029	0.408904	5.4089
1068.39	66.2137	0.179052	0.179052		87.1757	0.0596046	1.0596		74.8721	0.12568	2.12568		85.8109	0.0664574	3.06646		73.9412	0.131114	4.13111		66.7566	0.175506	5.17551		38.9923	0.409021	5.40902
1070.32	66.2463	0.178838	0.178838		87.1689	0.0596385	1.05964		74.65	0.12697	2.12697		85.6051	0.0675003	3.0675		73.8816	0.131464	4.13146		66.7737	0.175395	5.17539		38.9277	0.409741	5.40974
1072.24	66.2441	0.178853	0.178853		87.1467	0.0597489	1.05975		74.3864	0.128506	2.12851		85.3555	0.0687683	3.06877		73.7534	0.132218	4.13222		66.6983	0.175885	5.17589		38.9263	0.409757	5.40976
1074.17	66.239	0.178886	0.178886		87.1228	0.0598682	1.05987		74.0794	0.130302	2.1303		85.1136	0.070001	3.07		73.5633	0.133339	4.13334		66.5606	0.176783	5.17678		39.1271	0.407522	5.40752
1076.1	66.2431	0.178859	0.178859		87.1115	0.0599246	1.05992		73.88	0.131473	2.13147		84.9063	0.07106	3.07106		73.3704	0.134479	4.13448		66.4448	0.177539	5.17754		39.6497	0.40176	5.40176
1078.03	66.2739	0.178657	0.178657		87.0494	0.060234	1.06023		73.7163	0.132436	2.13244		84.7543	0.0718383	3.07184		73.184	0.135584	4.13558		66.3257	0.178318	5.17832		40.5359	0.39216	5.39216
1079.96	66.2958	0.178514	0.178514		86.9656	0.0606525	1.06065		73.4766	0.133851	2.13385		84.5869	0.072697	3.0727		73.0177	0.136572	4.13657		66.1887	0.179216	5.17922		41.7865	0.378963	5.37896
1081.89	66.2632	0.178728	0.178728		86.8672	0.0611443	1.06114		73.2125	0.135415	2.13541		84.3705	0.0738091	3.07381		72.9122	0.1372	4.1372		65.9919	0.180509	5.18051		43.3704	0.362807	5.36281
1083.82	66.2291	0.178951	0.178951		86.7298	0.0618314	1.06183		72.9113	0.137205	2.13721		84.1754	0.074815	3.07482		72.8869	0.137351	4.13735		65.7878	0.181855	5.18185		45.2342	0.344533	5.34453
1085.74	66.1716	0.179328	0.179328		86.5632	0.0626669	1.06267		72.6222	0.13893	2.13893		83.9878	0.0757837	3.07578		72.8818	0.137381	4.13738		65.5978	0.18311	5.18311		47.2544	0.325557	5.32556
1087.67	66.1036	0.179775	0.179775		86.3636	0.0636695	1.06367		72.3086	0.14081	2.14081		83.7373	0.0770812	3.07708		72.8544	0.137544	4.13754		65.3559	0.184715	5.18472		49.2644	0.307467	5.30747
1089.6	65.9503	0.180783	0.180783		86.0279	0.0653609	1.06536		71.8665	0.143474	2.14347		83.2961	0.0793754	3.07938		72.7118	0.138395	4.1384		65.0816	0.186542	5.18654		51.1005	0.291575	5.29158
1091.53	65.6314	0.182889	0.182889		85.5142	0.0679616	1.06796		71.3035	0.146889	2.14689		82.6917	0.0825379	3.08254		72.4386	0.14003	4.14003		64.7323	0.188879	5.18888		52.6798	0.278356	5.27836
1093.46	65.1699	0.185953	0.185953		84.8663	0.0712646	1.07126		70.6668	0.150785	2.15078		81.9577	0.08641	3.08641		72.0286	0.142495	4.14249		64.2517	0.192115	5.19212		53.9438	0.268059	5.26806
1095.39	64.6789	0.189238	0.189238		84.1779	0.0748018	1.0748		70.0722	0.154454	2.15445		81.238	0.0902408	3.09024		71.565	0.145299	4.1453		63.7813	0.195306	5.19531		54.8785	0.260597	5.2606
1097.32	64.2383	0.192206	0.192206		83.5678	0.0779609	1.07796		69.5511	0.157696	2.1577		80.5913	0.0937117	3.09371		71.1321	0.147935	4.14793		63.3334	0.198367	5.19837		55.5195	0.255555	5.25555
1099.24	63.9158	0.194392	0.194392		83.1473	0.080152	1.08015		69.1894	0.159961	2.15996		80.0666	0.0965487	3.09655		70.7869	0.150047	4.15005		62.9756	0.200828	5.20083		55.993	0.251866	5.25187
1101.17	63.7389	0.195596	0.195596		82.9727	0.0810648	1.08106		69.0312	0.160955	2.16095		79.75	0.0982692	3.09827		70.5647	0.151413	4.15141		62.7955	0.202072	5.20207		56.4327	0.248469	5.24847
1103.1	63.6928	0.195909	0.195909		83.0169	0.0808333	1.08083		69.1044	0.160494	2.16049		79.657	0.0987761	3.09878		70.5014	0.151802	4.1518		62.8062	0.201998	5.202		56.9008	0.244882	5.24488
1105.03	63.7541	0.195492	0.195492		83.2343	0.0796977	1.0797		69.293	0.15931	2.15931		79.7553	0.0982405	3.09824		70.5844	0.151291	4.15129		62.9365	0.201098	5.2011		57.4299	0.240862	5.24086
1106.96	63.9563	0.194117	0.194117		83.6279	0.0776487	1.07765		69.5511	0.157696	2.1577		80.022	0.0967904	3.09679		70.7946	0.15	4.15		63.1721	0.199475	5.19947		58.0376	0.236291	5.23629
1108.89	64.2922	0.191842	0.191842		84.1574	0.0749076	1.07491		69.9505	0.155209	2.15521		80.4353	0.0945535	3.09455		71.1344	0.14792	4.14792		63.5281	0.197034	5.19703		58.7629	0.230897	5.2309
1110.82	64.7131	0.189008	0.189008		84.8026	0.0715909	1.07159		70.4737	0.151973	2.15197		80.9688	0.0916821	3.09168		71.5867	0.145168	4.14517		63.964	0.194064	5.19406		59.6063	0.224707	5.22471
1112.74	65.1563	0.186043	0.186043		85.4809	0.0681307	1.06813		71.0442	0.148471	2.14847		81.576	0.0884377	3.08844		72.0672	0.142262	4.14226		64.4094	0.191051	5.19105		60.4694	0.218464	5.21846
1114.67	65.5691	0.183301	0.183301		86.0697	0.0651499	1.06515		71.5288	0.145519	2.14552		82.1319	0.0854884	3.08549		72.4809	0.139776	4.13978		64.8165	0.188315	5.18831		61.326	0.212356	5.21236
1116.6	65.8195	0.181645	0.181645		86.4549	0.0632104	1.06321		71.9271	0.143107	2.14311		82.4749	0.0836783	3.08368		72.773	0.13803	4.13803		65.1078	0.186367	5.18637		62.1494	0.206563	5.20656
1118.53	65.9187	0.180991	0.180991		86.6557	0.0622026	1.0622		72.2557	0.141128	2.14113		82.6616	0.0826961	3.0827		72.9644	0.136889	4.13689		65.2295	0.185556	5.18556		62.9107	0.201276	5.20128
1120.46	65.9279	0.18093	0.18093		86.7223	0.0618693	1.06187		72.4908	0.139717	2.13972		82.7967	0.0819869	3.08199		73.0671	0.136278	4.13628		65.2563	0.185378	5.18538		63.6055	0.196505	5.19651
1122.39	65.8889	0.181187	0.181187		86.7267	0.0618469	1.06185		72.7018	0.138455	2.13845		82.9399	0.0812364	3.08124		73.1503	0.135784	4.13578		65.2928	0.185135	5.18513		64.2181	0.192342	5.19234
1124.32	65.8167	0.181664	0.181664		86.7107	0.0619271	1.06193		72.8951	0.137302	2.1373		83.0555	0.0806314	3.08063		73.227	0.135329	4.13533		65.3058	0.185048	5.18505		64.7371	0.188846	5.18885
1126.24	65.7384	0.182181	0.182181		86.6893	0.0620346	1.06203		73.0811	0.136195	2.1362		83.129	0.0802473	3.08025		73.2411	0.135245	4.13525		65.2784	0.185231	5.18523		65.1856	0.185849	5.18585
1128.17	65.6219	0.182951	0.182951		86.5906	0.062529	1.06253		73.1912	0.135541	2.13554		83.1356	0.080213	3.08021		73.1805	0.135604	4.1356		65.1325	0.186202	5.1862		65.5533	0.183405	5.18341
1130.1	65.4604	0.184021	0.184021		86.3939	0.0635169	1.06352		73.2222	0.135357	2.13536		83.0462	0.08068	3.08068		73.0645	0.136294	4.13629		64.9188	0.18763	5.18763		65.8091	0.181714	5.18171
1132.03	65.2234	0.185597	0.185597		86.0911	0.0650415	1.06504		73.1327	0.135889	2.13589		82.8331	0.0817962	3.0818		72.8539	0.137547	4.13755		64.6546	0.1894	5.1894		65.9294	0.180921	5.18092
1133.96	64.943	0.187468	0.187468		85.652	0.0672625	1.06726		72.9071	0.13723	2.13723		82.5019	0.0835358	3.08354		72.5367	0.139442	4.13944		64.2775	0.191941	5.19194		65.8872	0.181199	5.1812
1135.89	64.6187	0.189642	0.189642		85.06	0.0702747	1.07027		72.5355	0.13945	2.13945		81.9976	0.0861989	3.0862		72.0976	0.142079	4.14208		63.763	0.195432	5.19543		65.6848	0.182535	5.18253
1137.81	64.1693	0.192672	0.192672		84.3151	0.0740948	1.07409		72.0173	0.142563	2.14256		81.3269	0.089766	3.08977		71.4947	0.145726	4.14573		63.0721	0.200163	5.20016		65.356	0.184714	5.18471
1139.74	63.5397	0.196955	0.196955		83.3328	0.0791839	1.07918		71.3226	0.146773	2.14677		80.4657	0.0943891	3.09439		70.6808	0.150699	4.1507		62.1804	0.206346	5.20635		64.9455	0.187451	5.18745
1141.67	62.7744	0.202217	0.202217		82.1014	0.0856495	1.08565		70.492	0.15186	2.15186		79.3921	0.100222	3.10022		69.6843	0.156865	4.15686		61.0924	0.214013	5.21401		64.514	0.190346	5.19035
1143.6	61.9185	0.20818	0.20818		80.7242	0.0929965	1.093		69.6166	0.157287	2.15729		78.1524	0.107058	3.10706		68.5794	0.163807	4.16381		59.8717	0.222778	5.22278		64.1441	0.192843	5.19284
1145.53	61.0351	0.214421	0.214421		79.3387	0.100515	1.10052		68.7335	0.162832	2.16283		76.9246	0.113935	3.11393		67.471	0.170883	4.17088		58.6823	0.231493	5.23149		63.955	0.194125	5.19413
1147.46	60.1648	0.220657	0.220657		78.0122	0.107837	1.10784		67.9019	0.168118	2.16812		75.7844	0.12042	3.12042		66.4393	0.177575	4.17758		57.6042	0.239546	5.23955		64.0281	0.193629	5.19363
1149.38	59.3602	0.226505	0.226505		76.8092	0.114587	1.11459		67.1774	0.172777	2.17278		74.721	0.126557	3.12656		65.5328	0.183541	4.18354		56.6192	0.247037	5.24704		64.4232	0.190958	5.19096
1151.31	58.6444	0.231773	0.231773		75.7394	0.120678	1.12068		66.5261	0.177008	2.17701		73.7316	0.132346	3.13235		64.7404	0.188824	4.18882		55.7165	0.254016	5.25402		65.2104	0.185683	5.18568
1153.24	57.9023	0.237304	0.237304		74.7283	0.126515	1.12651		65.8615	0.181368	2.18137		72.7115	0.138397	3.1384		63.9676	0.19404	4.19404		54.7787	0.261389	5.26139		66.4325	0.177619	5.17762
1155.17	56.8552	0.24523	0.24523		73.5328	0.133519	1.13352		64.8917	0.187811	2.18781		71.3751	0.146454	3.14645		63.0594	0.20025	4.20025		53.6018	0.270821	5.27082		68.0873	0.166934	5.16693
1157.1	55.4577	0.256038	0.256038		72.0209	0.142542	1.14254		63.4965	0.19725	2.19725		69.5893	0.157458	3.15746		61.8875	0.208397	4.2084		52.1818	0.282481	5.28248		70.1262	0.15412	5.15412
1159.03	53.9537	0.267979	0.267979		70.2935	0.153085	1.15308		61.9457	0.207989	2.20799		67.5783	0.170193	3.17019		60.5564	0.21784	4.21784		50.6491	0.295428	5.29543		72.4787	0.13979	5.13979
1160.96	52.7024	0.27817	0.27817		68.7122	0.162966	1.16297		60.6249	0.217349	2.21735		65.8198	0.181643	3.18164		59.3816	0.226348	4.22635		49.2771	0.307355	5.30736		75.0576	0.124605	5.12461
1162.88	51.9456	0.284451	0.284451		67.6333	0.16984	1.16984		59.7658	0.223547	2.22355		64.6523	0.189416	3.18942		58.6195	0.231958	4.23196		48.3364	0.315725	5.31573		77.7687	0.109195	5.1092
1164.81	51.7092	0.286433	0.286433		67.2265	0.17246	1.17246		59.4805	0.225625	2.22563		64.2719	0.191979	3.19198		58.4266	0.233389	4.23339		47.9904	0.318845	5.31885		80.5577	0.0938929	5.09389
1166.74	51.9601	0.28433	0.28433		67.5185	0.170577	1.17058		59.7785	0.223455	2.22345		64.6882	0.189175	3.18917		58.8438	0.2303	4.2303		48.3073	0.315988	5.31599		83.3509	0.0790897	5.07909
1168.67	52.7332	0.277915	0.277915		68.5466	0.164014	1.16401		60.6794	0.216958	2.21696		65.9369	0.180872	3.18087		59.8869	0.222668	4.22267		49.3278	0.306908	5.30691		86.0344	0.0653281	5.06533
1170.6	54.0236	0.267416	0.267416		70.3022	0.153031	1.15303		62.1602	0.206488	2.20649		67.953	0.167791	3.16779		61.5316	0.210902	4.2109		51.005	0.292388	5.29239		88.537	0.052875	5.05288
1172.53	55.7996	0.253369	0.253369		72.7014	0.138457	1.13846		64.1574	0.192753	2.19275		70.6666	0.150786	3.15079		63.7045	0.19583	4.19583		53.283	0.273412	5.27341		90.8395	0.0417251	5.04173
1174.46	57.9314	0.237086	0.237086		75.5472	0.121782	1.12178		66.5761	0.176682	2.17668		73.8577	0.131604	3.1316		66.2255	0.178975	4.17898		55.9926	0.25187	5.25187		92.8898	0.0320322	5.03203
1176.38	60.2871	0.219775	0.219775		78.6211	0.104461	1.10446		69.2085	0.159841	2.15984		77.2175	0.112284	3.11228		68.8787	0.161915	4.16192		58.8628	0.230159	5.23016		94.6295	0.0239736	5.02397
1178.31	62.6283	0.20323	0.20323		81.6319	0.0881401	1.08814		71.6415	0.144835	2.14484		80.3737	0.0948859	3.09489		71.3971	0.146319	4.14632		61.5967	0.210442	5.21044		96.0492	0.0175062	5.01751
1180.24	64.5155	0.190336	0.190336		84.177	0.0748068	1.07481		73.3987	0.134312	2.13431		82.9078	0.0814045	3.0814		73.464	0.133925	4.13393		63.8472	0.194858	5.19486		97.1251	0.0126686	5.01267
1182.17	65.5928	0.183144	0.183144		85.8977	0.0660186	1.06602		74.0219	0.13064	2.13064		84.4756	0.0732689	3.07327		74.8015	0.12609	4.12609		65.3549	0.184722	5.18472		97.8088	0.00962225	5.00962
1184.1	65.9909	0.180516	0.180516		86.7651	0.0616549	1.06165		73.5071	0.13367	2.13367		85.1307	0.0699136	3.06991		75.3956	0.122654	4.12265		66.124	0.179641	5.17964		98.086	0.00839302	5.00839
1186.03	66.0775	0.179946	0.179946		87.0414	0.060274	1.06027		72.206	0.141427	2.14143		85.2302	0.0694067	3.06941		75.5039	0.12203	4.12203		66.3668	0.178049	5.17805		97.9784	0.00886983	5.00887
1187.95	66.0897	0.179866	0.179866		87.0756	0.0601034	1.0601		70.3414	0.152789	2.15279		85.1211	0.0699628	3.06996		75.4269	0.122474	4.12247		66.3695	0.178032	5.17803		97.508	0.0109595	5.01096
1189.88	66.0842	0.179903	0.179903		87.0337	0.0603126	1.06031		67.9917	0.167544	2.16754		84.9271	0.0709537	3.07095		75.2997	0.123207	4.12321		66.2773	0.178635	5.17863		96.748	0.0143579	5.01436
1191.81	66.0597	0.180064	0.180064		86.9495	0.0607328	1.06073		65.2576	0.185369	2.18537		84.6762	0.0722388	3.07224		75.1706	0.123952	4.12395		66.1675	0.179355	5.17936		95.7978	0.0186444	5.01864
1193.74	66.0174	0.180342	0.180342		86.8353	0.0613035	1.0613		62.2481	0.205874	2.20587		84.3616	0.0738551	3.07386		75.043	0.12469	4.12469		66.0389	0.1802	5.1802		94.7177	0.0235687	5.02357
1195.67	65.9806	0.180583	0.180583		86.7118	0.061922	1.06192		59.198	0.227693	2.22769		84.0641	0.0753893	3.07539		74.9413	0.125279	4.12528		65.9028	0.181096	5.1811		93.5654	0.0288848	5.02888
1197.6	65.9095	0.181052	0.181052		86.6021	0.0624717	1.06247		56.372	0.248937	2.24894		83.7943	0.0767858	3.07679		74.8462	0.12583	4.12583		65.7454	0.182135	5.18213		92.4145	0.0342597	5.03426
1199.53	65.8085	0.181718	0.181718		86.5082	0.0629427	1.06294		54.0335	0.267337	2.26734		83.5656	0.0779727	3.07797		74.7354	0.126474	4.12647		65.5924	0.183146	5.18315		91.3311	0.0393813	5.03938
1201.45	65.6821	0.182553	0.182553		86.3926	0.0635233	1.06352		52.3392	0.281173	2.28117		83.3291	0.0792032	3.0792		74.5833	0.127359	4.12736		65.4508	0.184085	5.18409		90.3735	0.0439591	5.04396
1203.38	65.5641	0.183334	0.183334		86.2675	0.0641526	1.06415		50.9698	0.292687	2.29269		83.0746	0.0805316	3.08053		74.4042	0.128402	4.1284		65.2855	0.185183	5.18518		89.5485	0.0479418	5.04794
1205.31	65.4495	0.184093	0.184093		86.0847	0.0650738	1.06507		49.1987	0.308047	2.30805		82.7549	0.0822061	3.08221		74.1823	0.1297	4.1297		65.0588	0.186694	5.18669		88.8636	0.0512763	5.05128
1207.24	65.2928	0.185134	0.185134		85.799	0.0665178	1.06652		47.2341	0.325744	2.32574		82.3418	0.0843794	3.08438		73.9034	0.131336	4.13134		64.7639	0.188667	5.18867		88.2877	0.0541	5.0541
1209.17	65.0581	0.186699	0.186699		85.4059	0.0685122	1.06851		45.8606	0.33856	2.33856		81.869	0.0868805	3.08688		73.5489	0.133424	4.13342		64.4098	0.191048	5.19105		87.7391	0.056807	5.05681
1211.1	64.8105	0.188355	0.188355		84.9939	0.0706124	1.07061		45.2522	0.34436	2.34436		81.4227	0.0892545	3.08925		73.1636	0.135705	4.13571		64.0454	0.193512	5.19351		87.1856	0.0595552	5.05956
1213.03	64.6104	0.189698	0.189698		84.626	0.0724961	1.0725		45.0966	0.345857	2.34586		81.0169	0.0914245	3.09142		72.7967	0.137888	4.13789		63.7078	0.195807	5.19581		86.6096	0.0624338	5.06243
1214.95	64.4527	0.190759	0.190759		84.3359	0.0739873	1.07399		45.0913	0.345908	2.34591		80.6603	0.0933401	3.09334		72.5044	0.139636	4.13964		63.4362	0.197663	5.19766		85.9606	0.0657007	5.0657
1216.88	64.3251	0.19162	0.19162		84.1385	0.0750054	1.07501		45.0145	0.346647	2.34665		80.3739	0.0948848	3.09488		72.2708	0.141037	4.14104		63.2398	0.19901	5.19901		85.2192	0.0694625	5.06946
1218.81	64.2583	0.192071	0.192071		84.0584	0.0754189	1.07542		44.7765	0.348949	2.34895		80.1708	0.0959838	3.09598		72.1244	0.141918	4.14192		63.1538	0.199601	5.1996		84.3694	0.073815	5.07381
1220.74	64.2688	0.192	0.192		84.0736	0.0753403	1.07534		44.4689	0.351943	2.35194		80.0308	0.0967429	3.09674		72.0731	0.142227	4.14223		63.1585	0.199568	5.19957		83.4047	0.0788096	5.07881
1222.67	64.3655	0.191347	0.191347		84.1891	0.0747442	1.07474		44.3121	0.353478	2.35348		79.9948	0.0969382	3.09694		72.0982	0.142075	4.14208		63.2461	0.198966	5.19897		82.3598	0.0842845	5.08428
1224.6	64.4943	0.190478	0.190478		84.4141	0.0735851	1.07359		44.5223	0.351422	2.35142		80.0423	0.0966807	3.09668		72.1644	0.141677	4.14168		63.3692	0.198122	5.19812		81.278	0.090027	5.09003
1226.53	64.6574	0.189382	0.189382		84.7198	0.0720149	1.07201		45.2852	0.344044	2.34404		80.1013	0.0963605	3.09636		72.2704	0.14104	4.14104		63.5154	0.197121	5.19712		80.2066	0.0957899	5.09579
1228.45	64.856	0.18805	0.18805		85.0216	0.0704709	1.07047		46.5209	0.332352	2.33235		80.0863	0.0964416	3.09644		72.3873	0.140338	4.14034		63.6908	0.195923	5.19592		79.2097	0.101222	5.10122
1230.38	65.0265	0.186909	0.186909		85.2837	0.0691342	1.06913		47.8344	0.320259	2.32026		80.0166	0.09682	3.09682		72.49	0.139722	4.13972		63.8708	0.194698	5.1947		78.3234	0.106109	5.10611
1232.31	65.1316	0.186208	0.186208		85.4513	0.0682812	1.06828		48.9903	0.30989	2.30989		79.8814	0.0975543	3.09755		72.5205	0.139539	4.13954		63.9753	0.193988	5.19399		77.5532	0.110401	5.1104
1234.24	65.1487	0.186094	0.186094		85.5065	0.0680008	1.068		50.6603	0.295332	2.29533		79.6816	0.0986421	3.09864		72.4826	0.139766	4.13977		64.0156	0.193714	5.19371		76.8909	0.114125	5.11413
1236.17	65.0641	0.186658	0.186658		85.4522	0.0682767	1.06828		53.3981	0.272474	2.27247		79.4393	0.0999649	3.09996		72.3865	0.140343	4.14034		63.9842	0.193927	5.19393		76.3366	0.117267	5.11727
1238.1	64.9684	0.187298	0.187298		85.3671	0.0687094	1.06871		56.8535	0.245243	2.24524		79.2353	0.101081	3.10108		72.2858	0.140947	4.14095		63.9449	0.194194	5.19419		75.9213	0.119636	5.11964
1240.03	64.8711	0.187949	0.187949		85.26	0.0692549	1.06925		60.4069	0.218913	2.21891		79.0777	0.101946	3.10195		72.1924	0.141509	4.14151		63.8903	0.194565	5.19456		75.64	0.121249	5.12125
1241.95	64.6351	0.189532	0.189532		85.0157	0.0705011	1.0705		63.5773	0.196698	2.1967		78.8334	0.10329	3.10329		72.0146	0.14258	4.14258		63.7037	0.195835	5.19584		75.4679	0.122238	5.12224
1243.88	64.1559	0.192763	0.192763		84.5047	0.0731192	1.07312		65.9546	0.180755	2.18075		78.3737	0.10583	3.10583		71.6232	0.144946	4.14495		63.276	0.198761	5.19876		75.3696	0.122804	5.1228
1245.81	63.5344	0.196991	0.196991		83.7875	0.0768208	1.07682		67.4695	0.170892	2.17089		77.7979	0.109032	3.10903		71.0895	0.148195	4.14819		62.6837	0.202845	5.20285		75.3114	0.12314	5.12314
1247.74	62.9328	0.201123	0.201123		83.0158	0.0808391	1.08084		68.2897	0.165645	2.16565		77.2289	0.11222	3.11222		70.5361	0.151588	4.15159		62.0361	0.207356	5.20736		75.2962	0.123227	5.12323
1249.67	62.4289	0.204614	0.204614		82.354	0.0843151	1.08432		68.612	0.1636	2.1636		76.7865	0.114715	3.11472		70.0653	0.154497	4.1545		61.4179	0.211705	5.2117		75.309	0.123153	5.12315
1251.6	62.0346	0.207366	0.207366		81.8664	0.0868943	1.08689		68.6706	0.163229	2.16323		76.5022	0.116326	3.11633		69.7356	0.156545	4.15655		60.9334	0.215145	5.21514		75.3221	0.123078	5.12308
1253.52	61.8193	0.208876	0.208876		81.584	0.0883948	1.08839		68.7188	0.162924	2.16292		76.4127	0.116834	3.11683		69.5892	0.157458	4.15746		60.6824	0.216937	5.21694		75.3381	0.122985	5.12299
1255.45	61.7966	0.209035	0.209035		81.4964	0.0888615	1.08886		68.8521	0.162083	2.16208		76.5098	0.116283	3.11628		69.6181	0.157278	4.15728		60.6546	0.217136	5.21714		75.3599	0.12286	5.12286
1257.38	61.9276	0.208116	0.208116		81.6563	0.0880105	1.08801		69.1495	0.160211	2.16021		76.8445	0.114387	3.11439		69.82	0.15602	4.15602		60.8498	0.215741	5.21574		75.3774	0.122759	5.12276
1259.31	62.1822	0.206334	0.206334		82.0412	0.0859683	1.08597		69.5953	0.15742	2.15742		77.3976	0.111272	3.11127		70.1728	0.153831	4.15383		61.2349	0.213001	5.213		75.3755	0.12277	5.12277
1261.24	62.559	0.20371	0.20371		82.5945	0.0830487	1.08305		70.1834	0.153765	2.15377		78.0955	0.107374	3.10737		70.6646	0.150798	4.1508		61.7912	0.209074	5.20907		75.3618	0.122849	5.12285
1263.17	63.049	0.200322	0.200322		83.2713	0.0795044	1.0795		70.8616	0.149589	2.14959		78.8514	0.103191	3.10319		71.2372	0.147293	4.14729		62.4037	0.20479	5.20479		75.3536	0.122896	5.1229
1265.1	63.6005	0.196539	0.196539		84.0116	0.0756606	1.07566		71.5595	0.145333	2.14533		79.6328	0.0989081	3.09891		71.851	0.143567	4.14357		63.0532	0.200293	5.20029		75.3511	0.122911	5.12291
1267.02	64.0693	0.19335	0.19335		84.6705	0.072268	1.07227		72.1384	0.141834	2.14183		80.3007	0.0952808	3.09528		72.3713	0.140434	4.14043		63.6527	0.196183	5.19618		75.3373	0.12299	5.12299
1268.95	64.336	0.191546	0.191546		85.088	0.0701317	1.07013		72.4588	0.139909	2.13991		80.6806	0.0932307	3.09323		72.6688	0.138652	4.13865		64.0317	0.193605	5.19361		75.3156	0.123115	5.12312
1270.88	64.3619	0.191371	0.191371		85.191	0.0696062	1.06961		72.5025	0.139647	2.13965		80.7492	0.0928616	3.09286		72.7175	0.138361	4.13836		64.1065	0.193098	5.1931		75.2686	0.123386	5.12339
1272.81	64.272	0.191978	0.191978		85.1232	0.0699519	1.06995		72.4165	0.140162	2.14016		80.6827	0.0932195	3.09322		72.6326	0.138868	4.13887		64.0202	0.193683	5.19368		75.1937	0.123819	5.12382
1274.74	64.1519	0.192791	0.192791		85.0078	0.070541	1.07054		72.2906	0.140918	2.14092		80.5487	0.0939414	3.09394		72.5099	0.139603	4.1396		63.897	0.19452	5.19452		75.1048	0.124332	5.12433
1276.67	64.0191	0.19369	0.19369		84.8761	0.0712146	1.07121		72.135	0.141854	2.14185		80.3923	0.0947854	3.09479		72.3801	0.140381	4.14038		63.754	0.195493	5.19549		74.9938	0.124974	5.12497
1278.59	63.8853	0.194599	0.194599		84.6904	0.0721659	1.07217		71.9374	0.143045	2.14305		80.1993	0.0958294	3.09583		72.2048	0.141434	4.14143		63.5879	0.196625	5.19663		74.8671	0.125709	5.12571
1280.52	63.7495	0.195524	0.195524		84.4438	0.0734323	1.07343		71.7003	0.144479	2.14448		79.9932	0.0969471	3.09695		71.9848	0.142759	4.14276		63.4033	0.197888	5.19789		74.7427	0.126431	5.12643
1282.45	63.5268	0.197043	0.197043		84.0998	0.0752049	1.0752		71.3925	0.146347	2.14635		79.7287	0.0983854	3.09839		71.6935	0.14452	4.14452		63.1094	0.199906	5.19991		74.6041	0.127237	5.12724
1284.38	63.2056	0.199245	0.199245		83.6766	0.0773959	1.0774		71.0072	0.148698	2.1487		79.3873	0.100249	3.10025		71.3317	0.146718	4.14672		62.7337	0.202499	5.2025		74.4554	0.128104	5.1281
1286.31	62.8206	0.201898	0.201898		83.1873	0.0799429	1.07994		70.56	0.151441	2.15144		78.9859	0.10245	3.10245		70.9126	0.149277	4.14928		62.3318	0.205291	5.20529		74.3034	0.128991	5.12899
1288.24	62.473	0.204308	0.204308		82.7141	0.0824203	1.08242		70.1555	0.153938	2.15394		78.6032	0.10456	3.10456		70.5211	0.151681	4.15168		61.9471	0.207979	5.20798		74.132	0.129994	5.12999
1290.16	62.1651	0.206453	0.206453		82.266	0.0847799	1.08478		69.751	0.156449	2.15645		78.201	0.106787	3.10679		70.1379	0.154047	4.15405		61.5349	0.210879	5.21088		73.9251	0.131208	5.13121
1292.09	61.7455	0.209395	0.209395		81.6886	0.0878385	1.08784		69.2197	0.159771	2.15977		77.6439	0.109893	3.10989		69.6283	0.157214	4.15721		61.0168	0.214551	5.21455		73.6825	0.132636	5.13264
1294.02	61.1976	0.213265	0.213265		80.9228	0.091929	1.09193		68.5778	0.163817	2.16382		76.8928	0.114114	3.11411		68.9688	0.161347	4.16135		60.3593	0.219256	5.21926		73.414	0.134221	5.13422
1295.95	60.7013	0.216802	0.216802		80.2168	0.0957349	1.09573		68.0181	0.167376	2.16738		76.2028	0.118029	3.11803		68.3778	0.165085	4.16508		59.7232	0.223857	5.22386		73.1281	0.135916	5.13592
1297.88	60.3694	0.219183	0.219183		79.7359	0.098346	1.09835		67.6738	0.16958	2.16958		75.7615	0.120551	3.12055		67.9959	0.167517	4.16752		59.2705	0.227161	5.22716		72.8061	0.137832	5.13783
1299.81	60.2406	0.220111	0.220111		79.5492	0.0993642	1.09936		67.5891	0.170124	2.17012		75.6552	0.121161	3.12116		67.8788	0.168266	4.16827		59.1238	0.228238	5.22824		72.4574	0.139917	5.13992
1301.74	60.3122	0.219595	0.219595		79.64	0.098869	1.09887		67.7218	0.169272	2.16927		75.8256	0.120184	3.12018		68.0076	0.167443	4.16744		59.2308	0.227453	5.22745		72.0893	0.142129	5.14213
1303.66	60.5703	0.21774	0.21774		79.9777	0.0970313	1.09703		68.038	0.167248	2.16725		76.2476	0.117774	3.11777		68.362	0.165185	4.16519		59.5295	0.225268	5.22527		71.7178	0.144373	5.14437
1305.59	60.9459	0.215056	0.215056		80.4711	0.09436	1.09436		68.472	0.164487	2.16449		76.8397	0.114414	3.11441		68.8562	0.162057	4.16206		59.9753	0.222027	5.22203		71.368	0.146496	5.1465
1307.52	61.3705	0.21204	0.21204		81.0744	0.0911164	1.09112		68.9684	0.16135	2.16135		77.5353	0.110501	3.1105		69.4517	0.158317	4.15832		60.5403	0.217956	5.21796		71.0393	0.148501	5.1485
1309.45	61.7872	0.209102	0.209102		81.694	0.0878097	1.08781		69.4487	0.158336	2.15834		78.2181	0.106693	3.10669		70.0608	0.154525	4.15453		61.1034	0.213935	5.21393		70.7275	0.150411	5.15041
1311.38	62.193	0.206258	0.206258		82.2935	0.0846343	1.08463		69.8714	0.155701	2.1557		78.8569	0.10316	3.10316		70.6526	0.150872	4.15087		61.6236	0.210253	5.21025		70.4523	0.152105	5.15211
1313.31	62.5543	0.203743	0.203743		82.7968	0.0819862	1.08199		70.1496	0.153975	2.15397		79.378	0.1003	3.1003		71.1502	0.147824	4.14782		62.0411	0.20732	5.20732		70.2022	0.153649	5.15365
1315.24	62.8043	0.20201	0.20201		83.1232	0.0802775	1.08028		70.2592	0.153297	2.1533		79.7045	0.0985173	3.09852		71.4865	0.145776	4.14578		62.3105	0.205438	5.20544		69.9566	0.155171	5.15517
1317.16	62.7687	0.202257	0.202257		83.0718	0.0805465	1.08055		70.0433	0.154634	2.15463		79.6487	0.0988215	3.09882		71.4842	0.14579	4.14579		62.2505	0.205857	5.20586		69.7253	0.15661	5.15661
1319.09	62.3831	0.204933	0.204933		82.5536	0.0832641	1.08326		69.4102	0.158577	2.15858		79.1297	0.10166	3.10166		71.0859	0.148216	4.14822		61.7811	0.209144	5.20914		69.539	0.157771	5.15777
1321.02	61.8504	0.208658	0.208658		81.7518	0.0875028	1.0875		68.5401	0.164055	2.16406		78.3214	0.10612	3.10612		70.4681	0.152008	4.15201		61.0455	0.214346	5.21435		69.3563	0.158914	5.15891
1322.95	61.3919	0.211889	0.211889		81.0028	0.0914999	1.0915		67.7001	0.169411	2.16941		77.6088	0.110089	3.11009		69.8879	0.155598	4.1556		60.3387	0.219404	5.2194		69.1537	0.160185	5.16018
1324.88	61.0495	0.214318	0.214318		80.3925	0.0947847	1.09478		66.9028	0.174555	2.17456		77.1136	0.112869	3.11287		69.4217	0.158505	4.1585		59.7713	0.223507	5.22351		68.9491	0.161471	5.16147
1326.81	60.8138	0.215998	0.215998		79.9534	0.0971628	1.09716		66.1996	0.179145	2.17914		76.8629	0.114283	3.11428		69.1385	0.16028	4.16028		59.45	0.225848	5.22585		68.7697	0.162603	5.1626
1328.73	60.6284	0.217324	0.217324		79.6554	0.0987848	1.09878		65.4657	0.183986	2.18399		76.6514	0.11548	3.11548		68.9378	0.161542	4.16154		59.2393	0.22739	5.22739		68.5689	0.163873	5.16387
1330.66	60.5377	0.217974	0.217974		79.5192	0.0995278	1.09953		64.6616	0.189354	2.18935		76.5511	0.116049	3.11605		68.8579	0.162046	4.16205		59.1509	0.228039	5.22804		68.3686	0.165143	5.16514
1332.59	60.534	0.218001	0.218001		79.4973	0.0996477	1.09965		63.7205	0.195721	2.19572		76.5413	0.116104	3.1161		68.864	0.162008	4.16201		59.1621	0.227956	5.22796		68.1688	0.166414	5.16641
1334.52	60.6166	0.217408	0.217408		79.5895	0.0991443	1.09914		62.6136	0.203331	2.20333		76.5736	0.115921	3.11592		68.9368	0.161549	4.16155		59.215	0.227568	5.22757		67.9621	0.167733	5.16773
1336.45	60.6976	0.216829	0.216829		79.6912	0.0985896	1.09859		61.2433	0.212942	2.21294		76.564	0.115976	3.11598		68.9968	0.161171	4.16117		59.2436	0.227359	5.22736		67.7581	0.169039	5.16904
1338.38	60.73	0.216596	0.216596		79.7428	0.0983086	1.09831		59.5683	0.224985	2.22498		76.473	0.116492	3.11649		69.0087	0.161096	4.1611		59.2156	0.227564	5.22756		67.5546	0.170345	5.17034
1340.31	60.659	0.217105	0.217105		79.6189	0.0989838	1.09898		57.5131	0.240234	2.24023		76.1849	0.118131	3.11813		68.8646	0.162004	4.162		59.0436	0.228827	5.22883		67.3606	0.171594	5.17159
1342.23	60.4128	0.218871	0.218871		79.2282	0.10112	1.10112		55.1432	0.258508	2.25851		75.6493	0.121195	3.1212		68.5005	0.164306	4.16431		58.6527	0.231712	5.23171		67.1735	0.172802	5.1728
1344.16	59.6827	0.224152	0.224152		78.2515	0.106507	1.10651		52.3547	0.281044	2.28104		74.5293	0.127673	3.12767		67.6574	0.169685	4.16968		57.7182	0.238687	5.23869		66.9839	0.17403	5.17403
1346.09	58.2969	0.234354	0.234354		76.5286	0.116176	1.11618		49.2529	0.307568	2.30757		72.6461	0.138788	3.13879		66.2045	0.179113	4.17911		56.1361	0.250758	5.25076		66.7971	0.175242	5.17524
1348.02	56.3412	0.249174	0.249174		74.0401	0.130533	1.13053		46.0158	0.337093	2.33709		70.0754	0.154435	3.15443		64.1348	0.192906	4.19291		53.9567	0.267955	5.26795		66.5913	0.176582	5.17658
1349.95	54.182	0.266145	0.266145		71.1581	0.147776	1.14778		43.0998	0.365525	2.36552		67.3062	0.171945	3.17195		61.7908	0.209076	4.20908		51.5761	0.287551	5.28755		66.4157	0.17773	5.17773
1351.88	52.1837	0.282465	0.282465		68.3415	0.165315	1.16532		40.5611	0.39189	2.39189		64.6548	0.189399	3.1894		59.5239	0.225309	4.22531		49.2814	0.307317	5.30732		66.2416	0.178869	5.17887
1353.81	50.6635	0.295305	0.295305		66.006	0.180417	1.18042		38.3588	0.416136	2.41614		62.5051	0.204085	3.20408		57.6815	0.238963	4.23896		47.4315	0.323933	5.32393		66.0408	0.180188	5.18019
1355.73	49.796	0.302805	0.302805		64.3698	0.191318	1.19132		36.7281	0.435001	2.435		61.0127	0.21458	3.21458		56.4172	0.248589	4.24859		46.1072	0.336232	5.33623		65.7911	0.181833	5.18183
1357.66	49.5414	0.305031	0.305031		63.1593	0.199562	1.19956		35.6356	0.448116	2.44812		59.9418	0.22227	3.22227		55.5514	0.255305	4.2553		45.0357	0.346443	5.34644		65.4928	0.183807	5.18381
1359.59	49.541	0.305035	0.305035		61.7737	0.209197	1.2092		34.7306	0.459288	2.45929		58.7651	0.230881	3.23088		54.5943	0.262853	4.26285		43.8451	0.358079	5.35808		65.1659	0.18598	5.18598
1361.52	48.8284	0.311327	0.311327		59.6689	0.224252	1.22425		33.4768	0.475255	2.47526		56.9163	0.244763	3.24476		53.0391	0.275404	4.2754		42.2005	0.374683	5.37468		64.8642	0.187995	5.18799
1363.45	45.1892	0.344966	0.344966		56.0841	0.25116	1.25116		30.5134	0.515509	2.51551		53.5601	0.271159	3.27116		50.1275	0.299924	4.29992		39.5881	0.402435	5.40244		64.5574	0.190054	5.19005
1365.38	39.446	0.403997	0.403997		51.0268	0.292201	1.2922		26.4002	0.578393	2.57839		48.6912	0.31255	3.31255		45.8487	0.338673	4.33867		36.0248	0.443399	5.4434		64.2737	0.191967	5.19197
1367.31	33.7499	0.471728	0.471728		45.0199	0.346596	1.3466		22.4387	0.649001	2.649		42.9549	0.366987	3.36699		40.7329	0.390054	4.39005		31.8597	0.496758	5.49676		64.0229	0.193665	5.19366
1369.23	29.2455	0.533942	0.533942		38.9768	0.409194	1.40919		19.3825	0.712589	2.71259		37.3708	0.427468	3.42747		35.6526	0.447909	4.44791		27.6821	0.557801	5.5578		63.772	0.19537	5.19537
1371.16	26.1035	0.583301	0.583301		33.689	0.472512	1.47251		17.3787	0.759984	2.75998		32.6822	0.485689	3.48569		31.2885	0.504615	4.50461		23.9875	0.620015	5.62001		63.5035	0.197203	5.1972
1373.09	24.2553	0.615193	0.615193		29.9154	0.524105	1.5241		16.4119	0.78484	2.78484		29.6383	0.528147	3.52815		28.2668	0.548723	4.54872		21.4219	0.669142	5.66914		63.2565	0.198894	5.19889
1375.02	23.6576	0.626029	0.626029		28.3218	0.54788	1.54788		16.4582	0.783617	2.78362		28.8854	0.539322	3.53932		27.1263	0.56661	4.56661		20.5943	0.686253	5.68625		63.0404	0.200381	5.20038
1376.95	24.4114	0.612406	0.612406		29.6192	0.528426	1.52843		17.6445	0.753391	2.75339		30.8338	0.510973	3.51097		28.344	0.547538	4.54754		21.9248	0.659065	5.65906		62.805	0.202006	5.20201
1378.88	26.6793	0.573825	0.573825		33.9321	0.469389	1.46939		20.0719	0.697412	2.69741		35.4359	0.450557	3.45056		31.9788	0.495138	4.49514		25.3889	0.595356	5.59536		62.4908	0.204184	5.20418
1380.81	30.7216	0.512556	0.512556		40.902	0.388255	1.38826		24.0304	0.619238	2.61924		42.4895	0.371718	3.37172		37.8192	0.422287	4.42229		30.8398	0.510888	5.51089		62.1546	0.206527	5.20653
1382.73	36.8314	0.433782	0.433782		49.8063	0.302716	1.30272		30.075	0.521795	2.52179		51.258	0.290238	3.29024		45.2949	0.34395	4.34395		37.6749	0.423948	5.42395		61.8276	0.208818	5.20882
1384.66	44.9375	0.347391	0.347391		59.3752	0.226395	1.2264		38.3086	0.416704	2.4167		60.355	0.219287	3.21929		53.2804	0.273433	4.27343		44.8322	0.34841	5.34841		61.4894	0.2112	5.2112
1386.59	54.0608	0.267117	0.267117		68.3464	0.165284	1.16528		48.0115	0.318654	2.31865		68.6906	0.163103	3.1631		60.7416	0.216513	4.21651		51.5486	0.287783	5.28778		61.1737	0.213435	5.21344
1388.52	61.7301	0.209503	0.209503		75.6547	0.121164	1.12116		57.0899	0.243441	2.24344		75.1178	0.124257	3.12426		66.6592	0.17614	4.17614		56.9723	0.244336	5.24434		60.8554	0.215701	5.2157
1390.45	64.9349	0.187522	0.187522		80.5131	0.0941332	1.09413		62.4003	0.204813	2.20481		78.9837	0.102463	3.10246		70.3755	0.152579	4.15258		60.5841	0.217641	5.21764		60.5409	0.217951	5.21795
1392.38	65.1664	0.185976	0.185976		83.1506	0.0801348	1.08013		64.6278	0.18958	2.18958		80.6916	0.0931718	3.09317		72.2238	0.14132	4.14132		62.6165	0.203311	5.20331		60.3092	0.219616	5.21962
1394.3	64.6552	0.189397	0.189397		84.2079	0.0746472	1.07465		65.4661	0.183984	2.18398		80.9395	0.0918394	3.09184		72.773	0.13803	4.13803		63.4347	0.197673	5.19767		60.1209	0.220975	5.22097
1396.23	64.19	0.192533	0.192533		84.4134	0.0735884	1.07359		65.7764	0.18193	2.18193		80.5531	0.0939179	3.09392		72.6997	0.138468	4.13847		63.5685	0.196758	5.19676		59.9712	0.222058	5.22206
1398.16	63.8727	0.194685	0.194685		84.2577	0.0743905	1.07439		65.7857	0.181869	2.18187		80.0345	0.0967226	3.09672		72.4148	0.140173	4.14017		63.4122	0.197827	5.19783		59.8847	0.222684	5.22268
1400.09	63.681	0.19599	0.19599		83.9921	0.0757615	1.07576		65.5997	0.183098	2.1831		79.5599	0.0993058	3.09931		72.0598	0.142307	4.14231		63.1718	0.199477	5.19948		59.8825	0.2227	5.2227
1402.02	63.6035	0.196519	0.196519		83.7695	0.076914	1.07691		65.3126	0.185003	2.185		79.1658	0.101462	3.10146		71.7169	0.144379	4.14438		62.9437	0.201048	5.20105		59.9327	0.222336	5.22234
1403.95	63.6212	0.196398	0.196398		83.6688	0.0774367	1.07744		65.0149	0.186987	2.18699		78.8561	0.103165	3.10316		71.4412	0.146051	4.14605		62.7445	0.202425	5.20242		60.0244	0.221672	5.22167
1405.88	63.578	0.196693	0.196693		83.5717	0.0779409	1.07794		64.7476	0.188776	2.18878		78.749	0.103755	3.10375		71.2686	0.147102	4.1471		62.6656	0.202971	5.20297		60.2195	0.220263	5.22026
1407.8	63.4342	0.197676	0.197676		83.4306	0.0786745	1.07867		64.4319	0.190899	2.1909		78.5542	0.104831	3.10483		71.0744	0.148287	4.14829		62.551	0.203765	5.20377		60.4813	0.218379	5.21838
1409.73	63.2501	0.198939	0.198939		83.2664	0.0795304	1.07953		64.0805	0.193274	2.19327		78.2901	0.106293	3.10629		70.8688	0.149545	4.14955		62.3732	0.205002	5.205		60.7874	0.216187	5.21619
1411.66	62.9984	0.20067	0.20067		83.0818	0.0804942	1.08049		63.703	0.19584	2.19584		78.0092	0.107854	3.10785		70.689	0.150648	4.15065		62.2247	0.206037	5.20604		61.1385	0.213685	5.21368
1413.59	62.7046	0.2027	0.2027		82.8157	0.0818871	1.08189		63.2727	0.198783	2.19878		77.6315	0.109962	3.10996		70.4925	0.151857	4.15186		61.9871	0.207698	5.2077		61.4733	0.211314	5.21131
1415.52	62.4893	0.204194	0.204194		82.5226	0.0834269	1.08343		62.8504	0.201692	2.20169		77.2408	0.112153	3.11215		70.2963	0.153068	4.15307		61.6753	0.209888	5.20989		61.7878	0.209097	5.2091
1417.45	62.3495	0.205167	0.205167		82.288	0.0846637	1.08466		62.5266	0.203936	2.20394		77.008	0.113464	3.11346		70.2298	0.153479	4.15348		61.4578	0.211423	5.21142		62.1433	0.206606	5.20661
1419.38	62.16	0.206489	0.206489		81.9579	0.0864091	1.08641		62.192	0.206265	2.20627		76.6171	0.115674	3.11567		70.0983	0.154292	4.15429		61.1197	0.213819	5.21382		62.5069	0.204072	5.20407
1421.3	61.6828	0.209836	0.209836		81.1981	0.0904541	1.09045		61.5243	0.210954	2.21095		75.6892	0.120966	3.12097		69.5421	0.157753	4.15775		60.3048	0.219648	5.21965		62.797	0.202061	5.20206
1423.23	60.5817	0.217658	0.217658		79.6709	0.0987005	1.0987		60.2574	0.21999	2.21999		74.1458	0.129914	3.12991		68.3899	0.165008	4.16501		59.008	0.229089	5.22909		63.0946	0.200008	5.20001
1425.16	58.9513	0.229507	0.229507		77.4067	0.111221	1.11122		58.3726	0.233791	2.23379		71.919	0.143157	3.14316		66.6536	0.176177	4.17618		57.1572	0.242929	5.24293		63.3211	0.198451	5.19845
1427.09	57.1712	0.242823	0.242823		74.7426	0.126432	1.12643		56.2182	0.250123	2.25012		69.2923	0.159315	3.15932		64.5607	0.190032	4.19003		54.8831	0.260562	5.26056		63.4301	0.197705	5.1977
1429.02	55.416	0.256365	0.256365		71.9314	0.143081	1.14308		54.0605	0.26712	2.26712		66.5908	0.176586	3.17659		62.371	0.205017	4.20502		52.4794	0.280011	5.28001		63.4498	0.197569	5.19757
1430.95	53.6947	0.270069	0.270069		69.0828	0.16063	1.16063		52.0024	0.283977	2.28398		63.9505	0.194156	3.19416		60.2006	0.220399	4.2204		50.075	0.300379	5.30038		63.4132	0.19782	5.19782
1432.87	51.8979	0.28485	0.28485		66.116	0.179693	1.17969		50.0008	0.301023	2.30102		61.2552	0.212857	3.21286		57.962	0.236856	4.23686		47.6254	0.322161	5.32216		63.3193	0.198464	5.19846
1434.8	49.964	0.301343	0.301343		62.957	0.200956	1.20096		47.8891	0.319764	2.31976		58.2303	0.234851	3.23485		55.4815	0.255852	4.25585		45.0302	0.346496	5.3465		63.157	0.199579	5.19958
1436.73	47.4452	0.323807	0.323807		59.3112	0.226863	1.22686		45.2669	0.344219	2.34422		54.7725	0.261437	3.26144		52.5627	0.279322	4.27932		42.1598	0.375101	5.3751		62.9395	0.201077	5.20108
1438.66	44.3969	0.352648	0.352648		55.2824	0.257413	1.25741		42.2812	0.373853	2.37385		51.0273	0.292198	3.2922		49.3212	0.306966	4.30697		39.1339	0.407446	5.40745		62.728	0.202539	5.20254
1440.59	41.155	0.385578	0.385578		51.0926	0.291642	1.29164		39.1629	0.407125	2.40712		47.1007	0.326973	3.32697		45.8663	0.338506	4.33851		35.9734	0.444019	5.44402		62.5071	0.204071	5.20407
1442.52	38.0211	0.419975	0.419975		47.1053	0.326931	1.32693		36.2341	0.440882	2.44088		43.4907	0.361604	3.3616		42.5393	0.371209	4.37121		33.0909	0.480291	5.48029		62.3331	0.205281	5.20528
1444.44	35.0095	0.455814	0.455814		43.2734	0.363779	1.36378		33.5924	0.473759	2.47376		40.2433	0.395307	3.39531		39.3714	0.404819	4.40482		30.6705	0.513279	5.51328		62.2969	0.205533	5.20553
1446.37	32.3471	0.490164	0.490164		39.716	0.401035	1.40103		31.285	0.504663	2.50466		37.0797	0.430864	3.43086		36.366	0.439304	4.4393		28.3155	0.547976	5.54798		62.3326	0.205284	5.20528
1448.3	29.9979	0.52291	0.52291		36.3387	0.439631	1.43963		29.2266	0.534222	2.53422		34.0331	0.468098	3.4681		33.4742	0.475289	4.47529		25.9729	0.585479	5.58548		62.4388	0.204545	5.20455
1450.23	27.9961	0.552902	0.552902		33.2172	0.478636	1.47864		27.5105	0.560502	2.5605		31.3253	0.504105	3.5041		30.8318	0.511001	4.511		23.901	0.621584	5.62158		62.6961	0.20276	5.20276
1452.16	26.4449	0.577658	0.577658		30.5358	0.515191	1.51519		26.2174	0.58141	2.58141		29.0277	0.537188	3.53719		28.5702	0.544087	4.54409		22.1696	0.654243	5.65424		63.021	0.200515	5.20051
1454.09	25.7024	0.590026	0.590026		29.1018	0.53608	1.53608		25.6693	0.590585	2.59059		27.866	0.554926	3.55493		27.3348	0.563285	4.56328		21.2144	0.67337	5.67337		63.4211	0.197766	5.19777
1456.02	25.8605	0.587363	0.587363		29.1604	0.535207	1.53521		25.9793	0.585373	2.58537		28.1348	0.550757	3.55076		27.3725	0.562686	4.56269		21.2651	0.672333	5.67233		63.9401	0.194227	5.19423
1457.94	26.9058	0.570154	0.570154		30.607	0.51418	1.51418		27.1524	0.566192	2.56619		29.7942	0.525868	3.52587		28.6219	0.543301	4.5433		22.2734	0.652213	5.65221		64.5758	0.18993	5.18993
1459.87	28.6822	0.542388	0.542388		32.8914	0.482917	1.48292		29.0961	0.536165	2.53617		32.4858	0.488307	3.48831		30.7107	0.51271	4.51271		24.1056	0.617882	5.61788		65.3281	0.1849	5.1849
1461.8	31.2415	0.505268	0.505268		36.4374	0.438452	1.43845		31.8684	0.49664	2.49664		36.2525	0.440662	3.44066		33.8313	0.470681	4.47068		26.8458	0.571123	5.57112		66.1725	0.179322	5.17932
1463.73	34.2975	0.464737	0.464737		40.824	0.389085	1.38908		35.2054	0.453391	2.45339		40.6978	0.390429	3.39043		37.6011	0.4248	4.4248		30.147	0.520756	5.52076		67.053	0.173582	5.17358
1465.66	37.9094	0.421253	0.421253		46.0181	0.337071	1.33707		39.1943	0.406777	2.40678		45.8345	0.338807	3.33881		41.9786	0.376972	4.37697		34.0144	0.468337	5.46834		67.9872	0.167573	5.16757
1467.59	42.0118	0.376629	0.376629		51.7418	0.286159	1.28616		43.7852	0.358673	2.35867		51.5455	0.287809	3.28781		46.7973	0.329779	4.32978		38.3485	0.416251	5.41625		68.9703	0.161338	5.16134
1469.52	46.4064	0.333422	0.333422		57.6923	0.238882	1.23888		48.8277	0.311333	2.31133		57.5761	0.239758	3.23976		51.8275	0.28544	4.28544		43.0439	0.366088	5.36609		69.9846	0.154997	5.155
1471.44	50.7965	0.294167	0.294167		63.496	0.197254	1.19725		54.0093	0.267532	2.26753		63.4894	0.197299	3.1973		56.7332	0.246163	4.24616		47.8094	0.320486	5.32049		70.9968	0.148761	5.14876
1473.37	55.1105	0.258766	0.258766		69.0923	0.16057	1.16057		59.0565	0.228732	2.22873		68.9369	0.161548	3.16155		61.3799	0.211974	4.21197		52.1693	0.282585	5.28258		71.8962	0.143294	5.14329
1475.3	58.8092	0.230555	0.230555		74.0325	0.130577	1.13058		63.5138	0.197132	2.19713		73.7885	0.132011	3.13201		65.4747	0.183926	4.18393		56.0847	0.251155	5.25116		72.6953	0.138493	5.13849
1477.23	61.521	0.210977	0.210977		77.995	0.107933	1.10793		67.1108	0.173207	2.17321		77.8155	0.108934	3.10893		68.8526	0.162079	4.16208		59.3929	0.226266	5.22627		73.4579	0.133962	5.13396
1479.16	63.2018	0.19927	0.19927		80.9282	0.0919002	1.0919		69.5855	0.157481	2.15748		80.603	0.0936487	3.09365		71.2926	0.146955	4.14696		61.8167	0.208894	5.20889		73.9064	0.131318	5.13132
1481.09	64.4835	0.190551	0.190551		83.2318	0.0797107	1.07971		71.3828	0.146406	2.14641		82.541	0.0833302	3.08333		73.1067	0.136043	4.13604		63.5114	0.197148	5.19715		73.9716	0.130935	5.13093
1483.02	65.3604	0.184685	0.184685		84.7991	0.0716085	1.07161		72.5923	0.13911	2.13911		83.9175	0.0761476	3.07615		74.3635	0.12864	4.12864		64.6623	0.189349	5.18935		73.8197	0.131828	5.13183
1484.94	65.7631	0.182018	0.182018		85.6521	0.0672622	1.06726		73.2861	0.134978	2.13498		84.7297	0.0719646	3.07196		75.1377	0.124142	4.12414		65.4258	0.184251	5.18425		73.433	0.134109	5.13411
1486.87	65.8168	0.181663	0.181663		85.9607	0.0657	1.0657		73.5526	0.133402	2.1334		84.9623	0.0707736	3.07077		75.4823	0.122155	4.12215		65.9197	0.180985	5.18099		72.6852	0.138554	5.13855
1488.8	66.0299	0.180259	0.180259		86.4749	0.06311	1.06311		73.807	0.131902	2.1319		84.9923	0.0706206	3.07062		75.8366	0.120121	4.12012		66.3034	0.178464	5.17846		71.5716	0.145259	5.14526
1490.73	66.1987	0.179151	0.179151		86.9015	0.0609725	1.06097		73.8716	0.131523	2.13152		84.7991	0.0716088	3.07161		76.0311	0.119009	4.11901		66.4671	0.177394	5.17739		70.1452	0.154002	5.154
1492.66	66.3793	0.177967	0.177967		87.2218	0.0593752	1.05938		73.8212	0.131819	2.13182		84.6291	0.0724805	3.07248		76.1307	0.11844	4.11844		66.4417	0.177559	5.17756		68.6037	0.163653	5.16365
1494.59	66.3403	0.178223	0.178223		87.5058	0.0579633	1.05796		73.8499	0.13165	2.13165		84.8419	0.0713898	3.07139		76.3647	0.117107	4.11711		66.9231	0.174424	5.17442		67.2889	0.172057	5.17206
1496.52	66.3314	0.178281	0.178281		87.7956	0.0565271	1.05653		73.7155	0.132441	2.13244		84.6145	0.0725554	3.07256		76.5081	0.116293	4.11629		67.2704	0.172176	5.17218		65.6667	0.182654	5.18265
1498.44	66.3925	0.177881	0.177881		88.0751	0.0551471	1.05515		73.4246	0.134158	2.13416		84.2072	0.0746509	3.07465		76.5553	0.116025	4.11602		67.4572	0.170972	5.17097		63.8965	0.194523	5.19452
1500.37	66.4419	0.177558	0.177558		88.3	0.0540395	1.05404		73.0227	0.136542	2.13654		83.7262	0.0771389	3.07714		76.5451	0.116082	4.11608		67.5222	0.170554	5.17055		62.08	0.207048	5.20705
1502.3	66.4572	0.177458	0.177458		88.4617	0.0532448	1.05324		72.5935	0.139103	2.1391		83.3092	0.0793069	3.07931		76.5275	0.116182	4.11618		67.5604	0.170308	5.17031		60.2736	0.219873	5.21987
1504.23	66.4227	0.177684	0.177684		88.563	0.0527475	1.05275		72.1871	0.14154	2.14154		82.8971	0.0814608	3.08146		76.5381	0.116122	4.11612		67.6086	0.169998	5.17		58.5451	0.23251	5.23251
1506.16	66.4982	0.17719	0.17719		88.6568	0.052288	1.05229		71.6595	0.144726	2.14473		82.1479	0.0854036	3.0854		76.3957	0.116931	4.11693		67.4941	0.170734	5.17073		56.6798	0.246572	5.24657
1508.09	66.5487	0.176861	0.176861		88.6545	0.0522993	1.0523		71.1205	0.148005	2.14801		81.6146	0.0882321	3.08823		76.3012	0.117469	4.11747		67.5027	0.170679	5.17068		54.9815	0.259784	5.25978
1510.01	66.4815	0.177299	0.177299		88.608	0.0525272	1.05253		70.63	0.151011	2.15101		81.0862	0.0910533	3.09105		76.1961	0.118067	4.11807		67.497	0.170715	5.17072		53.4788	0.271818	5.27182
1511.94	66.4039	0.177807	0.177807		88.5517	0.0528029	1.0528		70.1967	0.153683	2.15368		80.4205	0.0946331	3.09463		76.0513	0.118893	4.11889		67.4155	0.17124	5.17124		52.0899	0.283246	5.28325
1513.87	66.3888	0.177905	0.177905		88.4702	0.0532027	1.0532		69.8006	0.156141	2.15614		79.7392	0.0983283	3.09833		75.8617	0.119977	4.11998		67.233	0.172417	5.17242		50.8452	0.29375	5.29375
1515.8	66.4396	0.177573	0.177573		88.3907	0.0535933	1.05359		69.4176	0.15853	2.15853		79.0559	0.102066	3.10207		75.6211	0.121357	4.12136		66.8766	0.174726	5.17473		49.7751	0.302988	5.30299
1517.73	66.5522	0.176838	0.176838		88.3321	0.0538812	1.05388		69.0263	0.160985	2.16099		78.4686	0.105304	3.1053		75.3665	0.122822	4.12282		66.4062	0.177792	5.17779		48.8874	0.310803	5.3108
1519.66	66.6317	0.176319	0.176319		88.2612	0.0542303	1.05423		68.7171	0.162935	2.16294		78.32	0.106127	3.10613		75.2285	0.123617	4.12362		66.16	0.179405	5.1794		48.333	0.315757	5.31576
1521.59	66.573	0.176702	0.176702		88.32	0.053941	1.05394		68.5276	0.164135	2.16413		78.3845	0.10577	3.10577		75.2744	0.123353	4.12335		66.447	0.177524	5.17752		48.0288	0.318498	5.3185
1523.51	66.7077	0.175824	0.175824		88.4048	0.0535243	1.05352		68.1554	0.1665	2.1665		77.8506	0.108738	3.10874		75.1396	0.124131	4.12413		66.1962	0.179167	5.17917		47.5522	0.322829	5.32283
1525.44	66.9192	0.174449	0.174449		88.476	0.0531744	1.05317		67.7677	0.168977	2.16898		77.5606	0.110359	3.11036		74.9725	0.125098	4.1251		65.8275	0.181592	5.18159		47.1975	0.326081	5.32608
1527.37	66.9657	0.174148	0.174148		88.51	0.0530079	1.05301		67.5193	0.170572	2.17057		77.5539	0.110396	3.1104		74.935	0.125315	4.12532		65.7295	0.18224	5.18224		46.9872	0.32802	5.32802
1529.3	66.9503	0.174248	0.174248		88.4693	0.0532073	1.05321		67.3767	0.17149	2.17149		77.301	0.111815	3.11182		75.0665	0.124554	4.12455		65.9404	0.180848	5.18085		46.7544	0.330177	5.33018
1531.23	66.9113	0.174501	0.174501		88.378	0.0536556	1.05366		67.2542	0.172281	2.17228		76.9975	0.113523	3.11352		75.2024	0.123768	4.12377		66.2887	0.17856	5.17856		46.5673	0.331919	5.33192
1533.16	66.9115	0.174499	0.174499		88.326	0.0539115	1.05391		67.0831	0.173387	2.17339		76.4733	0.11649	3.11649		75.2262	0.123631	4.12363		66.5265	0.177005	5.17701		46.3644	0.333816	5.33382
1535.09	66.8791	0.17471	0.17471		88.2867	0.0541046	1.0541		66.9638	0.17416	2.17416		76.0901	0.118672	3.11867		75.2683	0.123388	4.12339		66.7337	0.175655	5.17565		46.2854	0.334556	5.33456
1537.01	66.8007	0.175219	0.175219		88.3017	0.0540311	1.05403		66.8879	0.174653	2.17465		75.6715	0.121068	3.12107		75.2498	0.123495	4.12349		66.7908	0.175283	5.17528		46.2415	0.334968	5.33497
1538.94	66.7768	0.175374	0.175374		88.3037	0.0540212	1.05402		66.8845	0.174675	2.17467		75.3391	0.12298	3.12298		75.1838	0.123876	4.12388		66.7214	0.175735	5.17573		46.3078	0.334346	5.33435
1540.87	66.7762	0.175379	0.175379		88.271	0.0541819	1.05418		66.929	0.174386	2.17439		75.1774	0.123913	3.12391		75.1368	0.124147	4.12415		66.6021	0.176512	5.17651		46.5244	0.332319	5.33232
1542.8	66.8239	0.175068	0.175068		88.2848	0.0541141	1.05411		66.9589	0.174191	2.17419		75.003	0.124921	3.12492		75.0348	0.124738	4.12474		66.3666	0.178051	5.17805		46.861	0.329189	5.32919
1544.73	66.8728	0.17475	0.17475		88.3639	0.0537253	1.05373		67.068	0.173485	2.17348		75.0885	0.124427	3.12443		74.9433	0.125267	4.12527		66.0935	0.179841	5.17984		47.3325	0.324841	5.32484
1546.66	66.828	0.175042	0.175042		88.3757	0.053667	1.05367		67.2265	0.17246	2.17246		75.7654	0.120529	3.12053		75.1181	0.124255	4.12426		66.4248	0.17767	5.17767		48.0266	0.318518	5.31852
1548.58	66.9114	0.1745	0.1745		88.4018	0.0535389	1.05354		67.2849	0.172082	2.17208		76.1791	0.118164	3.11816		75.1366	0.124148	4.12415		66.5439	0.176892	5.17689		48.8177	0.311423	5.31142
1550.51	67.0798	0.173408	0.173408		88.4135	0.0534813	1.05348		67.3632	0.171577	2.17158		76.5887	0.115835	3.11584		75.0762	0.124497	4.1245		66.4184	0.177712	5.17771		49.7225	0.303447	5.30345
1552.44	67.1844	0.172731	0.172731		88.4452	0.0533256	1.05333		67.5958	0.17008	2.17008		77.2378	0.11217	3.11217		75.1171	0.124261	4.12426		66.4404	0.177568	5.17757		50.7728	0.294369	5.29437
1554.37	67.1615	0.17288	0.17288		88.472	0.0531943	1.05319		68.0204	0.167361	2.16736		77.8506	0.108738	3.10874		75.306	0.12317	4.12317		66.7305	0.175676	5.17568		51.9342	0.284547	5.28455
1556.3	67.1432	0.172998	0.172998		88.4318	0.0533914	1.05339		68.475	0.164468	2.16447		78.2169	0.106699	3.1067		75.6001	0.121477	4.12148		67.1127	0.173196	5.1732		53.0597	0.275235	5.27524
1558.23	67.1744	0.172796	0.172796		88.433	0.0533854	1.05339		68.9099	0.161719	2.16172		78.6664	0.104211	3.10421		75.784	0.120423	4.12042		67.2859	0.172076	5.17208		54.2246	0.265804	5.2658
1560.15	67.3061	0.171945	0.171945		88.5408	0.0528568	1.05286		69.3725	0.158812	2.15881		78.9912	0.102421	3.10242		75.8549	0.120016	4.12002		67.2435	0.17235	5.17235		55.3215	0.257106	5.25711
1562.08	67.4625	0.170937	0.170937		88.6517	0.052313	1.05231		69.9084	0.155471	2.15547		79.4726	0.0997826	3.09978		75.9748	0.11933	4.11933		67.1587	0.172898	5.1729		56.387	0.248821	5.24882
1564.01	67.5149	0.1706	0.1706		88.7318	0.0519207	1.05192		70.4809	0.151929	2.15193		80.0926	0.0964076	3.09641		76.1962	0.118067	4.11807		67.2091	0.172572	5.17257		57.4074	0.241032	5.24103
1565.94	67.5754	0.170212	0.170212		88.8115	0.0515308	1.05153		71.0021	0.148729	2.14873		80.5471	0.0939499	3.09395		76.2959	0.117499	4.1175		67.1279	0.173097	5.1731		58.3178	0.234199	5.2342
1567.87	67.6315	0.169851	0.169851		88.903	0.0510835	1.05108		71.4897	0.145756	2.14576		80.9871	0.0915843	3.09158		76.3881	0.116975	4.11697		67.0454	0.173631	5.17363		59.1029	0.228392	5.22839
1569.8	67.6445	0.169768	0.169768		89.0231	0.0504972	1.0505		71.9532	0.14295	2.14295		81.4101	0.0893219	3.08932		76.4831	0.116435	4.11643		66.9701	0.174119	5.17412		59.7966	0.223324	5.22332
1571.73	67.5837	0.170158	0.170158		89.1211	0.0500196	1.05002		72.44	0.140022	2.14002		82.0217	0.0860714	3.08607		76.6283	0.115611	4.11561		67.0425	0.17365	5.17365		60.3905	0.219032	5.21903
1573.65	67.5197	0.170569	0.170569		89.1273	0.0499893	1.04999		72.8351	0.137659	2.13766		82.6731	0.0826356	3.08264		76.8401	0.114412	4.11441		67.4193	0.171216	5.17122		60.8987	0.215392	5.21539
1575.58	67.5859	0.170144	0.170144		89.154	0.049859	1.04986		73.1169	0.135982	2.13598		82.8656	0.0816259	3.08163		76.7893	0.114699	4.1147		67.3607	0.171593	5.17159		61.2685	0.212763	5.21276
1577.51	67.5895	0.170121	0.170121		89.1754	0.0497547	1.04975		73.4197	0.134188	2.13419		83.1394	0.0801933	3.08019		76.7684	0.114818	4.11482		67.3184	0.171866	5.17187		61.5517	0.21076	5.21076
1579.44	67.5733	0.170225	0.170225		89.2068	0.049602	1.0496		73.7073	0.132489	2.13249		83.3647	0.0790177	3.07902		76.7825	0.114738	4.11474		67.2997	0.171987	5.17199		61.7181	0.209587	5.20959
1581.37	67.5645	0.170281	0.170281		89.1958	0.0496558	1.04966		73.9415	0.131112	2.13111		83.5584	0.0780099	3.07801		76.8036	0.114619	4.11462		67.2639	0.172218	5.17222		61.8156	0.208902	5.2089
1583.3	67.5028	0.170678	0.170678		89.1483	0.0498871	1.04989		74.1329	0.129989	2.12999		83.8489	0.0765027	3.0765		76.8577	0.114313	4.11431		67.3211	0.171849	5.17185		61.8485	0.208671	5.20867
1585.23	67.5086	0.170641	0.170641		89.1334	0.0499594	1.04996		74.2902	0.129069	2.12907		83.9944	0.0757499	3.07575		76.8349	0.114441	4.11444		67.2864	0.172073	5.17207		61.739	0.209441	5.20944
1587.15	67.5646	0.170281	0.170281		89.1465	0.0498957	1.0499		74.4441	0.12817	2.12817		84.075	0.075333	3.07533		76.7958	0.114663	4.11466		67.2781	0.172126	5.17213		61.5232	0.210961	5.21096
1589.08	67.5514	0.170366	0.170366		89.1446	0.0499049	1.0499		74.6278	0.127099	2.1271		84.1611	0.0748886	3.07489		76.8493	0.11436	4.11436		67.3753	0.171499	5.1715		61.2786	0.212691	5.21269
1591.01	67.4996	0.170699	0.170699		89.1326	0.0499635	1.04996		74.7784	0.126224	2.12622		84.1262	0.0750687	3.07507		76.911	0.114012	4.11401		67.5241	0.170541	5.17054		60.9416	0.215086	5.21509
1592.94	67.4985	0.170706	0.170706		89.1462	0.0498974	1.0499		74.7841	0.126191	2.12619		83.887	0.0763054	3.07631		76.8392	0.114417	4.11442		67.5428	0.170421	5.17042		60.4272	0.218768	5.21877
1594.87	67.4861	0.170786	0.170786		89.161	0.0498251	1.04983		74.706	0.126645	2.12664		83.6549	0.0775085	3.07751		76.7977	0.114652	4.11465		67.577	0.170201	5.1702		59.8173	0.223173	5.22317
1596.8	67.4488	0.171025	0.171025		89.156	0.0498492	1.04985		74.5712	0.127429	2.12743		83.3676	0.0790025	3.079		76.7701	0.114808	4.11481		67.5813	0.170173	5.17017		59.1205	0.228262	5.22826
1598.72	67.417	0.171231	0.171231		89.1152	0.0500484	1.05005		74.4195	0.128313	2.12831		82.9927	0.08096	3.08096		76.696	0.115227	4.11523		67.5615	0.1703	5.1703		58.3068	0.234281	5.23428
1600.65	67.4255	0.171176	0.171176		89.068	0.0502783	1.05028		74.223	0.129461	2.12946		82.4831	0.083635	3.08364		76.5479	0.116067	4.11607		67.4825	0.170809	5.17081		57.324	0.241664	5.24166
1602.58	67.4153	0.171241	0.171241		88.9905	0.0506565	1.05066		73.9884	0.130836	2.13084		82.0383	0.0859835	3.08598		76.4251	0.116764	4.11676		67.4342	0.17112	5.17112		56.2896	0.249572	5.24957
1604.51	67.3073	0.171938	0.171938		88.8744	0.0512235	1.05122		73.7127	0.132457	2.13246		81.5686	0.0884772	3.08848		76.3476	0.117204	4.1172		67.4302	0.171146	5.17115		55.264	0.257558	5.25756
1606.44	67.2512	0.1723	0.1723		88.7938	0.0516174	1.05162		73.2878	0.134968	2.13497		80.7788	0.0927026	3.0927		76.1716	0.118207	4.11821		67.2572	0.172261	5.17226		54.0205	0.267442	5.26744
1608.37	67.2523	0.172293	0.172293		88.7141	0.0520074	1.05201		72.7425	0.138212	2.13821		79.8916	0.0974991	3.0975		75.9396	0.119532	4.11953		67.0402	0.173665	5.17366		52.6378	0.278702	5.2787
1610.3	67.2364	0.172396	0.172396		88.6324	0.0524076	1.05241		72.1522	0.14175	2.14175		79.0979	0.101835	3.10184		75.7321	0.12072	4.12072		66.9423	0.174299	5.1743		51.2679	0.290154	5.29015
1612.22	67.2172	0.172519	0.172519		88.5574	0.0527753	1.05278		71.3818	0.146412	2.14641		78.1331	0.107165	3.10716		75.4422	0.122386	4.12239		66.7561	0.175509	5.17551		49.779	0.302954	5.30295
1614.15	67.1713	0.172816	0.172816		88.4797	0.0531562	1.05316		70.5199	0.151688	2.15169		77.1141	0.112866	3.11287		75.1398	0.12413	4.12413		66.5714	0.176712	5.17671		48.2499	0.316503	5.3165
1616.08	67.11	0.173213	0.173213		88.4139	0.0534794	1.05348		69.6492	0.157084	2.15708		76.0321	0.119003	3.119		74.8217	0.125973	4.12597		66.3794	0.177966	5.17797		46.7122	0.33057	5.33057
1618.01	67.1027	0.17326	0.17326		88.345	0.0538182	1.05382		68.7166	0.162938	2.16294		74.869	0.125698	3.1257		74.4226	0.128295	4.1283		66.0838	0.179905	5.17991		45.0992	0.345831	5.34583
1619.94	67.1546	0.172924	0.172924		88.243	0.0543198	1.05432		67.7013	0.169403	2.1694		73.6843	0.132625	3.13262		73.9724	0.13093	4.13093		65.7043	0.182406	5.18241		43.4525	0.361986	5.36199
1621.87	67.1912	0.172687	0.172687		88.0623	0.05521	1.05521		66.7305	0.175675	2.17568		72.7595	0.13811	3.13811		73.6215	0.132995	4.133		65.3873	0.184507	5.18451		41.9211	0.377567	5.37757
1623.8	67.1859	0.172722	0.172722		87.8673	0.0561725	1.05617		65.8465	0.181467	2.18147		71.9229	0.143133	3.14313		73.3175	0.134792	4.13479		65.1972	0.185771	5.18577		40.4952	0.392597	5.3926
1625.72	67.2017	0.17262	0.17262		87.7273	0.0568653	1.05687		65.0007	0.187082	2.18708		70.943	0.149091	3.14909		72.9494	0.136979	4.13698		64.9404	0.187485	5.18748		39.12	0.407602	5.4076
1627.65	67.2042	0.172603	0.172603		87.5966	0.0575129	1.05751		64.2543	0.192098	2.1921		70.053	0.154574	3.15457		72.6164	0.138965	4.13897		64.6714	0.189288	5.18929		37.87	0.421705	5.4217
1629.58	67.1803	0.172758	0.172758		87.4414	0.0582829	1.05828		63.6362	0.196296	2.1963		69.3765	0.158788	3.15879		72.3741	0.140417	4.14042		64.4619	0.190697	5.1907		36.8586	0.433462	5.43346
1631.51	67.1437	0.172995	0.172995		87.3017	0.0589772	1.05898		63.1117	0.19989	2.19989		68.7237	0.162893	3.16289		72.1464	0.141785	4.14179		64.2333	0.19224	5.19224		36.0764	0.442777	5.44278
1633.44	67.1515	0.172944	0.172944		87.2023	0.0594723	1.05947		62.7316	0.202514	2.20251		68.2391	0.165967	3.16597		71.9858	0.142753	4.14275		64.0365	0.193573	5.19357		35.4532	0.450345	5.45034
1635.37	67.0797	0.173409	0.173409		87.0865	0.0600493	1.06005		62.4164	0.204701	2.2047		67.8605	0.168383	3.16838		71.9292	0.143095	4.14309		63.929	0.194302	5.1943		35.036	0.455485	5.45549
1637.3	66.9837	0.174031	0.174031		86.9837	0.0605621	1.06056		62.0689	0.207126	2.20713		67.5125	0.170616	3.17062		71.8547	0.143545	4.14354		63.742	0.195575	5.19557		34.8405	0.457915	5.45792
1639.22	66.8526	0.174882	0.174882		86.8552	0.0612042	1.0612		61.6709	0.20992	2.20992		67.3002	0.171984	3.17198		71.7582	0.144129	4.14413		63.4949	0.197261	5.19726		34.7574	0.458952	5.45895
1641.15	66.6167	0.176417	0.176417		86.6672	0.062145	1.06214		61.5183	0.210996	2.211		67.1864	0.172719	3.17272		71.8462	0.143596	4.1436		63.6673	0.196084	5.19608		34.8641	0.457621	5.45762
1643.08	66.5094	0.177117	0.177117		86.5629	0.0626684	1.06267		61.3631	0.212093	2.21209		66.8599	0.174835	3.17483		71.7902	0.143935	4.14393		63.6335	0.196314	5.19631		35.1341	0.454271	5.45427
1645.01	66.5009	0.177173	0.177173		86.4898	0.0630349	1.06303		61.1371	0.213695	2.2137		66.5385	0.176927	3.17693		71.651	0.144777	4.14478		63.4133	0.197819	5.19782		35.4934	0.449852	5.44985
1646.94	66.5652	0.176753	0.176753		86.4144	0.0634137	1.06341		60.9082	0.215324	2.21532		66.3699	0.178029	3.17803		71.5131	0.145615	4.14561		63.1636	0.199533	5.19953		35.9826	0.443907	5.44391
1648.87	66.6454	0.17623	0.17623		86.2965	0.0640068	1.06401		60.7839	0.216212	2.21621		66.5037	0.177154	3.17715		71.4864	0.145777	4.14578		63.1091	0.199908	5.19991		36.6256	0.436215	5.43622
1650.8	66.7116	0.175799	0.175799		86.2331	0.0643261	1.06433		60.7223	0.216652	2.21665		66.641	0.176258	3.17626		71.4771	0.145833	4.14583		63.1551	0.199592	5.19959		37.3578	0.427619	5.42762
1652.72	66.8641	0.174807	0.174807		86.308	0.0639487	1.06395		60.6855	0.216915	2.21691		66.6439	0.17624	3.17624		71.3645	0.146518	4.14652		62.9534	0.200981	5.20098		38.1775	0.418193	5.41819
1654.65	67.0516	0.173591	0.173591		86.3935	0.0635189	1.06352		60.7586	0.216392	2.21639		66.8997	0.174576	3.17458		71.2975	0.146926	4.14693		62.7324	0.202508	5.20251		39.1619	0.407136	5.40714
1656.58	67.2222	0.172487	0.172487		86.4463	0.0632537	1.06325		60.9565	0.21498	2.21498		67.4116	0.171265	3.17127		71.3533	0.146586	4.14659		62.6472	0.203098	5.2031		40.2728	0.394988	5.39499
1658.51	67.3678	0.171548	0.171548		86.5164	0.0629014	1.0629		61.2689	0.21276	2.21276		67.9737	0.167659	3.16766		71.4543	0.145972	4.14597		62.5999	0.203426	5.20343		41.5655	0.381267	5.38127
1660.44	67.4748	0.170859	0.170859		86.5801	0.0625821	1.06258		61.733	0.209482	2.20948		68.6772	0.163188	3.16319		71.6301	0.144905	4.1449		62.6426	0.20313	5.20313		43.025	0.366279	5.36628
1662.37	67.4806	0.170821	0.170821		86.6469	0.0622469	1.06225		62.1667	0.206442	2.20644		69.2892	0.159335	3.15933		71.8013	0.143868	4.14387		62.7879	0.202124	5.20212		44.5331	0.351317	5.35132
1664.29	67.5341	0.170477	0.170477		86.7824	0.0615682	1.06157		62.5706	0.20363	2.20363		69.8675	0.155725	3.15572		71.8918	0.143321	4.14332		62.8812	0.201479	5.20148		46.1522	0.335808	5.33581
1666.22	67.5084	0.170642	0.170642		86.8852	0.0610543	1.06105		63.1129	0.199882	2.19988		70.6659	0.15079	3.15079		72.0831	0.142167	4.14217		63.2116	0.199203	5.1992		47.902	0.319646	5.31965
1668.15	67.4548	0.170987	0.170987		86.9772	0.0605946	1.06059		63.8053	0.195143	2.19514		71.2699	0.147094	3.14709		72.3302	0.14068	4.14068		63.7259	0.195684	5.19568		49.7552	0.303162	5.30316
1670.08	67.4662	0.170914	0.170914		87.1366	0.0597992	1.0598		64.4143	0.191018	2.19102		71.8026	0.14386	3.14386		72.4533	0.139942	4.13994		63.8817	0.194623	5.19462		51.6881	0.28661	5.28661
1672.01	67.36	0.171598	0.171598		87.2103	0.0594322	1.05943		64.9444	0.187458	2.18746		72.4235	0.14012	3.14012		72.657	0.138723	4.13872		64.3153	0.191686	5.19169		53.6202	0.270672	5.27067
1673.94	67.3343	0.171763	0.171763		87.2521	0.0592241	1.05922		65.3902	0.184487	2.18449		73.0016	0.136668	3.13667		72.802	0.137857	4.13786		64.6998	0.189097	5.1891		55.7014	0.254134	5.25413
1675.87	67.292	0.172037	0.172037		87.2626	0.0591717	1.05917		65.8632	0.181357	2.18136		73.7236	0.132394	3.13239		73.0138	0.136595	4.1366		65.1284	0.18623	5.18623		57.8381	0.237786	5.23779
1677.79	67.2052	0.172597	0.172597		87.3401	0.0587862	1.05879		66.3652	0.17806	2.17806		74.4313	0.128244	3.12824		73.2144	0.135403	4.1354		65.5022	0.183744	5.18374		60.0324	0.221614	5.22161
1679.72	67.1966	0.172653	0.172653		87.505	0.0579671	1.05797		66.8205	0.17509	2.17509		75.1216	0.124235	3.12423		73.323	0.13476	4.13476		65.6647	0.182668	5.18267		62.3172	0.205392	5.20539
1681.65	67.1989	0.172638	0.172638		87.6268	0.0573633	1.05736		67.2313	0.172428	2.17243		76.063	0.118826	3.11883		73.4845	0.133804	4.1338		65.8243	0.181614	5.18161		64.6606	0.18936	5.18936
1683.58	67.1036	0.173254	0.173254		87.7311	0.0568466	1.05685		67.7637	0.169003	2.169		77.1138	0.112868	3.11287		73.7182	0.132425	4.13243		66.2127	0.179059	5.17906		66.9466	0.174272	5.17427
1685.51	66.9977	0.17394	0.17394		87.8905	0.0560579	1.05606		68.2824	0.165691	2.16569		77.8961	0.108484	3.10848		73.8252	0.131795	4.1318		66.5303	0.17698	5.17698		69.3549	0.158923	5.15892
1687.44	66.8633	0.174812	0.174812		87.9878	0.0555777	1.05558		68.7724	0.162586	2.16259		78.8037	0.103454	3.10345		74.0528	0.130459	4.13046		67.012	0.173847	5.17385		71.7799	0.143997	5.144
1689.37	66.8515	0.174889	0.174889		88.0905	0.0550707	1.05507		68.988	0.161227	2.16123		79.5464	0.0993797	3.09938		74.1975	0.129611	4.12961		67.4024	0.171325	5.17132		74.2274	0.129436	5.12944
1691.29	66.9683	0.174131	0.174131		88.2724	0.054175	1.05417		69.0747	0.160681	2.16068		80.2048	0.0957996	3.0958		74.2455	0.12933	4.12933		67.613	0.16997	5.16997		76.7263	0.115056	5.11506
1693.22	67.0564	0.17356	0.17356		88.4661	0.053223	1.05322		69.0939	0.16056	2.16056		80.9137	0.0919777	3.09198		74.2986	0.129019	4.12902		67.8543	0.168423	5.16842		79.2247	0.101139	5.10114
1695.15	67.1911	0.172688	0.172688		88.65	0.0523215	1.05232		68.7709	0.162595	2.1626		81.4929	0.08888	3.08888		74.2102	0.129536	4.12954		68.0556	0.167136	5.16714		81.5931	0.0883466	5.08835
1697.08	67.2882	0.172061	0.172061		88.8056	0.0515597	1.05156		68.0362	0.16726	2.16726		82.0053	0.0861581	3.08616		74.0185	0.13066	4.13066		68.3113	0.165508	5.16551		83.8657	0.0764155	5.07642
1699.01	67.3755	0.171498	0.171498		88.938	0.0509126	1.05091		66.7343	0.175651	2.17565		82.212	0.0850646	3.08506		73.6628	0.132752	4.13275		68.6407	0.163418	5.16342		85.9749	0.0656286	5.06563
1700.94	67.5558	0.170337	0.170337		89.1166	0.0500413	1.05004		64.9684	0.187298	2.1873		82.2345	0.0849459	3.08495		73.0964	0.136104	4.1361		68.7225	0.162901	5.1629		88.0798	0.0551234	5.05512
1702.86	67.6607	0.169663	0.169663		89.3227	0.0490383	1.04904		62.9848	0.200764	2.20076		82.3076	0.0845603	3.08456		72.5286	0.139491	4.13949		68.8497	0.162098	5.1621		89.9383	0.0460555	5.04606
1704.79	67.7182	0.169295	0.169295		89.4816	0.0482663	1.04827		60.7597	0.216384	2.21638		82.3114	0.0845402	3.08454		72.026	0.142511	4.14251		69.0822	0.160634	5.16063		91.5996	0.0381064	5.03811
1706.72	67.8045	0.168742	0.168742		89.6259	0.0475666	1.04757		58.1915	0.235141	2.23514		82.2325	0.0849563	3.08496		71.615	0.144996	4.145		69.2071	0.159849	5.15985		92.9389	0.0318026	5.0318
1708.65	67.8996	0.168132	0.168132		89.7582	0.0469261	1.04693		55.4863	0.255814	2.25581		82.3531	0.0843201	3.08432		71.4045	0.146274	4.14627		69.3213	0.159133	5.15913		93.9978	0.0268822	5.02688
1710.58	67.9401	0.167874	0.167874		89.8919	0.0462792	1.04628		52.9567	0.276079	2.27608		82.6771	0.0826149	3.08261		71.4483	0.146008	4.14601		69.5934	0.157432	5.15743		94.8004	0.0231898	5.02319
1712.51	67.9717	0.167672	0.167672		89.992	0.0457962	1.0458		50.4978	0.296728	2.29673		83.1032	0.0803822	3.08038		71.7382	0.144249	4.14425		69.8024	0.15613	5.15613		95.511	0.0199465	5.01995
1714.43	68.0676	0.167059	0.167059		90.0178	0.0456717	1.04567		48.2028	0.316927	2.31693		83.8365	0.076567	3.07657		72.3501	0.140561	4.14056		70.046	0.154617	5.15462		96.0258	0.0176119	5.01761
1716.36	68.3329	0.16537	0.16537		90.0482	0.045525	1.04552		46.0598	0.336678	2.33668		84.6419	0.0724144	3.07241		73.0236	0.136537	4.13654		70.088	0.154356	5.15436		96.4919	0.0155093	5.01551
1718.29	68.5251	0.16415	0.16415		90.0767	0.0453877	1.04539		44.3495	0.353111	2.35311		85.7225	0.066905	3.06691		73.874	0.131508	4.13151		70.1502	0.153971	5.15397		96.8665	0.0138263	5.01383
1720.22	68.5616	0.163919	0.163919		90.1051	0.0452505	1.04525		43.2363	0.364152	2.36415		86.9578	0.0606916	3.06069		74.8282	0.125934	4.12593		70.2935	0.153085	5.15308		97.2712	0.0120156	5.01202
1722.15	68.6262	0.16351	0.16351		90.2116	0.0447378	1.04474		42.519	0.371417	2.37142		87.963	0.0556998	3.0557		75.6802	0.121018	4.12102		70.5097	0.151751	5.15175		97.6309	0.0104125	5.01041
1724.08	68.7384	0.162801	0.162801		90.3716	0.043968	1.04397		41.6174	0.380725	2.38072		88.6912	0.0521193	3.05212		76.311	0.117413	4.11741		70.5342	0.1516	5.1516		97.9023	0.00920719	5.00921
1726.01	68.7747	0.162571	0.162571		90.5505	0.0431092	1.04311		40.5691	0.391805	2.3918		89.2779	0.0492561	3.04926		76.8076	0.114596	4.1146		70.5498	0.151505	5.1515		98.1486	0.00811602	5.00812
1727.93	68.7919	0.162463	0.162463		90.7111	0.0423397	1.04234		39.4205	0.404277	2.40428		89.6836	0.0472871	3.04729		77.1716	0.112542	4.11254		70.6777	0.150718	5.15072		98.4187	0.00692242	5.00692
1729.86	68.8075	0.162364	0.162364		90.8309	0.0417663	1.04177		38.3071	0.416721	2.41672		90.0129	0.0456951	3.0457		77.4664	0.110887	4.11089		70.8356	0.149748	5.14975		98.6605	0.00585656	5.00586
1731.79	68.7839	0.162513	0.162513		90.8585	0.0416343	1.04163		37.1832	0.429654	2.42965		90.1457	0.0450552	3.04506		77.7097	0.109525	4.10952		70.965	0.148956	5.14896		98.874	0.00491785	5.00492
1733.72	68.7387	0.162799	0.162799		90.8954	0.0414581	1.04146		36.1136	0.44233	2.44233		90.0809	0.0453672	3.04537		77.8758	0.108598	4.1086		70.9718	0.148914	5.14891		98.9478	0.00459395	5.00459
1735.65	68.6502	0.163358	0.163358		90.8991	0.0414407	1.04144		35.2023	0.453428	2.45343		90.1457	0.0450552	3.04506		78.0389	0.107689	4.10769		71.0388	0.148504	5.1485		99.0946	0.00395019	5.00395
1737.58	68.5462	0.164017	0.164017		90.8432	0.0417074	1.04171		34.5989	0.460938	2.46094		90.3132	0.0442487	3.04425		78.2052	0.106764	4.10676		71.195	0.14755	5.14755		99.2517	0.00326209	5.00326
1739.51	68.5127	0.164229	0.164229		90.7801	0.0420093	1.04201		34.2644	0.465157	2.46516		90.4359	0.0436594	3.04366		78.3025	0.106224	4.10622		71.2202	0.147397	5.1474		99.3276	0.00292988	5.00293
1741.43	68.6024	0.163661	0.163661		90.7332	0.042234	1.04223		34.2827	0.464925	2.46492		90.6183	0.0427839	3.04278		78.3597	0.105907	4.10591		71.1527	0.147808	5.14781		99.3011	0.00304577	5.00305
1743.36	68.6794	0.163174	0.163174		90.6666	0.0425525	1.04255		34.675	0.459983	2.45998		91.0186	0.0408701	3.04087		78.4869	0.105203	4.1052		71.1365	0.147907	5.14791		99.3353	0.00289652	5.0029
1745.29	68.6843	0.163143	0.163143		90.5874	0.0429323	1.04293		35.6376	0.448092	2.44809		91.4415	0.0388568	3.03886		78.6238	0.104446	4.10445		71.0333	0.148538	5.14854		99.3556	0.00280747	5.00281
1747.22	68.6175	0.163565	0.163565		90.5368	0.043175	1.04318		37.2861	0.428453	2.42845		91.9244	0.036569	3.03657		78.7795	0.103587	4.10359		70.9979	0.148755	5.14875		99.4351	0.00246046	5.00246
1749.15	68.544	0.164031	0.164031		90.5713	0.0430093	1.04301		39.241	0.40626	2.40626		92.2703	0.0349382	3.03494		78.9512	0.102641	4.10264		71.0989	0.148137	5.14814		99.4836	0.00224842	5.00225
1751.08	68.5447	0.164026	0.164026		90.6378	0.0426905	1.04269		41.0662	0.386515	2.38652		92.4295	0.0341895	3.03419		79.0201	0.102263	4.10226		70.9921	0.14879	5.14879		99.4325	0.00247164	5.00247
1753.01	68.5478	0.164007	0.164007		90.7073	0.0423578	1.04236		43.0475	0.366052	2.36605		92.689	0.0329719	3.03297		79.1247	0.101688	4.10169		71.0048	0.148712	5.14871		99.4159	0.00254433	5.00254
1754.93	68.6386	0.163432	0.163432		90.7735	0.0420411	1.04204		45.1486	0.345356	2.34536		92.9601	0.0317032	3.0317		79.2349	0.101084	4.10108		71.0533	0.148416	5.14842		99.4515	0.00238875	5.00239
1756.86	68.7645	0.162636	0.162636		90.8668	0.0415948	1.04159		47.4195	0.324043	2.32404		93.2252	0.0304666	3.03047		79.3411	0.100502	4.1005		70.9476	0.149063	5.14906		99.4489	0.00240002	5.0024
1758.79	68.7669	0.16262	0.16262		90.9263	0.0413103	1.04131		49.7911	0.302849	2.30285		93.5147	0.0291203	3.02912		79.4799	0.0997428	4.09974		70.8834	0.149455	5.14946		99.5214	0.00208344	5.00208
1760.72	68.6991	0.163049	0.163049		90.9353	0.0412676	1.04127		52.2443	0.281961	2.28196		93.7049	0.0282379	3.02824		79.6112	0.0990256	4.09903		71.0717	0.148303	5.1483		99.5157	0.00210822	5.00211
1762.65	68.6121	0.163599	0.163599		90.9153	0.0413632	1.04136		54.7075	0.261953	2.26195		93.8309	0.0276543	3.02765		79.712	0.0984766	4.09848		71.4048	0.146273	5.14627		99.5142	0.00211486	5.00211
1764.58	68.597	0.163695	0.163695		90.9023	0.041425	1.04143		57.2926	0.241901	2.2419		93.8329	0.027645	3.02765		79.7656	0.0981842	4.09818		71.687	0.14456	5.14456		99.4472	0.0024074	5.00241
1766.51	68.6511	0.163352	0.163352		90.935	0.041269	1.04127		59.8573	0.222883	2.22288		93.7979	0.0278071	3.02781		79.8127	0.0979281	4.09793		71.8389	0.14364	5.14364		99.3545	0.00281241	5.00281
1768.43	68.7392	0.162796	0.162796		90.9651	0.0411252	1.04113		62.3114	0.205432	2.20543		93.8395	0.0276144	3.02761		79.8805	0.097559	4.09756		71.931	0.143084	5.14308		99.2794	0.00314103	5.00314
1770.36	68.8463	0.162119	0.162119		90.9917	0.0409982	1.041		64.5967	0.18979	2.18979		93.9721	0.027001	3.027		79.9511	0.0971756	4.09718		71.9968	0.142687	5.14269		99.2737	0.00316584	5.00317
1772.29	68.9289	0.161599	0.161599		91.0338	0.0407975	1.0408		66.8245	0.175064	2.17506		94.0885	0.0264633	3.02646		79.9773	0.0970331	4.09703		71.9872	0.142745	5.14274		99.2507	0.0032666	5.00327
1774.22	69.0078	0.161102	0.161102		91.078	0.0405867	1.04059		68.843	0.16214	2.16214		94.1286	0.0262784	3.02628		79.978	0.0970294	4.09703		71.9308	0.143085	5.14308		99.1936	0.00351617	5.00352
1776.15	69.0612	0.160766	0.160766		91.1259	0.0403584	1.04036		70.4695	0.151999	2.152		94.1458	0.0261991	3.0262		80.0075	0.0968695	4.09687		71.8455	0.143601	5.1436		99.1102	0.00388174	5.00388
1778.08	69.0999	0.160523	0.160523		91.2017	0.0399969	1.04		71.84	0.143633	2.14363		94.2132	0.0258883	3.02589		80.0398	0.0966942	4.09669		71.6463	0.144806	5.14481		99.0625	0.0040908	5.00409
1780	69.1055	0.160488	0.160488		91.2582	0.0397282	1.03973		73.0395	0.136442	2.13644		94.3542	0.0252388	3.02524		80.1054	0.0963381	4.09634		71.5437	0.145429	5.14543		99.0367	0.00420362	5.0042
1781.93	69.1265	0.160356	0.160356		91.2971	0.039543	1.03954		73.9559	0.131027	2.13103		94.4244	0.0249155	3.02492		80.1409	0.0961461	4.09615		71.4314	0.146111	5.14611		98.9852	0.0044296	5.00443
1783.86	69.0864	0.160607	0.160607		91.3359	0.0393585	1.03936		74.7037	0.126658	2.12666		94.4153	0.0249575	3.02496		80.1599	0.0960427	4.09604		71.3091	0.146855	5.14685		98.8548	0.00500202	5.005
1785.79	68.9826	0.16126	0.16126		91.3126	0.0394695	1.03947		75.3639	0.122837	2.12284		94.4496	0.0248001	3.0248		80.2302	0.0956619	4.09566		71.4019	0.14629	5.14629		98.7599	0.00541923	5.00542
1787.72	68.8983	0.161792	0.161792		91.2701	0.0396714	1.03967		75.9678	0.11937	2.11937		94.4026	0.0250158	3.02502		80.2683	0.0954558	4.09546		71.6848	0.144573	5.14457		98.6191	0.00603879	5.00604
1789.65	68.8344	0.162195	0.162195		91.2664	0.0396892	1.03969		76.5202	0.116224	2.11622		94.2871	0.0255476	3.02555		80.2526	0.0955411	4.09554		71.9048	0.143242	5.14324		98.5251	0.00645307	5.00645
1791.58	68.7922	0.162461	0.162461		91.2862	0.039595	1.0396		77.1145	0.112864	2.11286		94.2009	0.0259451	3.02595		80.2631	0.0954843	4.09548		72.0542	0.142341	5.14234		98.4256	0.00689193	5.00689
1793.5	68.768	0.162614	0.162614		91.3168	0.0394495	1.03945		77.7324	0.109398	2.1094		94.2231	0.0258428	3.02584		80.3052	0.0952565	4.09526		72.1775	0.141598	5.1416		98.3801	0.00709283	5.00709
1795.43	68.7841	0.162512	0.162512		91.3509	0.039287	1.03929		78.3472	0.105977	2.10598		94.2714	0.0256201	3.02562		80.3068	0.0952477	4.09525		72.2738	0.141019	5.14102		98.3733	0.00712276	5.00712
1797.36	68.878	0.16192	0.16192		91.3641	0.0392246	1.03922		78.9458	0.102671	2.10267		94.3435	0.0252882	3.02529		80.2761	0.0954138	4.09541		72.3516	0.140552	5.14055		98.3714	0.00713102	5.00713
1799.29	68.9257	0.161619	0.161619		91.3786	0.0391553	1.03916		79.566	0.0992724	2.09927		94.4523	0.0247877	3.02479		80.2742	0.0954239	4.09542		72.4142	0.140177	5.14018		98.3455	0.00724533	5.00725
1801.22	68.978	0.161289	0.161289		91.3785	0.0391559	1.03916		80.1296	0.0962068	2.09621		94.4665	0.0247221	3.02472		80.2421	0.0955977	4.0956		72.3007	0.140857	5.14086		98.2823	0.00752478	5.00752
1803.15	69.0451	0.160867	0.160867		91.4068	0.0390213	1.03902		80.6717	0.0932789	2.09328		94.5871	0.0241682	3.02417		80.279	0.0953982	4.0954		72.1598	0.141705	5.1417		98.2155	0.00781997	5.00782
1805.07	69.1064	0.160482	0.160482		91.5318	0.0384279	1.03843		81.2808	0.0900121	2.09001		94.8499	0.0229634	3.02296		80.4302	0.0945807	4.09458		72.1512	0.141757	5.14176		98.235	0.00773379	5.00773
1807	69.2559	0.159543	0.159543		91.6518	0.0378589	1.03786		81.8532	0.0869641	2.08696		95.0179	0.0221944	3.02219		80.5906	0.0937156	4.09372		72.2197	0.141344	5.14134		98.2463	0.00768402	5.00768
1808.93	69.478	0.158153	0.158153		91.7557	0.037367	1.03737		82.2341	0.0849481	2.08495		95.0713	0.0219504	3.02195		80.6611	0.0933357	4.09334		72.1535	0.141742	5.14174		98.1914	0.00792637	5.00793
1810.86	69.6098	0.15733	0.15733		91.8628	0.0368601	1.03686		82.6004	0.0830177	2.08302		95.1753	0.0214757	3.02148		80.7544	0.0928338	4.09283		72.1546	0.141736	5.14174		98.1285	0.00820484	5.0082
1812.79	69.7378	0.156532	0.156532		91.9342	0.0365228	1.03652		82.9418	0.0812264	2.08123		95.2733	0.0210287	3.02103		80.8634	0.0922482	4.09225		72.2957	0.140887	5.14089		98.0808	0.00841596	5.00842
1814.72	69.9068	0.155481	0.155481		91.9279	0.0365527	1.03655		83.2631	0.0795477	2.07955		95.2597	0.0210908	3.02109		80.9274	0.0919046	4.0919		72.3544	0.140535	5.14053		98.0002	0.00877326	5.00877
1816.65	69.9994	0.154906	0.154906		91.8733	0.0368108	1.03681		83.4773	0.0784314	2.07843		95.2182	0.0212798	3.02128		80.9826	0.0916083	4.09161		72.3826	0.140366	5.14037		97.9874	0.00882977	5.00883
1818.57	69.9967	0.154923	0.154923		91.8174	0.037075	1.03707		83.4756	0.0784405	2.07844		95.0336	0.0221226	3.02212		80.9729	0.0916601	4.09166		72.4521	0.139949	5.13995		97.9004	0.00921536	5.00922
1820.5	69.9171	0.155417	0.155417		91.7895	0.0372072	1.03721		83.4382	0.0786348	2.07863		94.7635	0.0233591	3.02336		80.8788	0.0921651	4.09217		72.5052	0.139631	5.13963		97.7745	0.00977435	5.00977
1822.43	69.8464	0.155856	0.155856		91.7465	0.0374104	1.03741		83.3458	0.0791161	2.07912		94.5267	0.0244455	3.02445		80.7333	0.0929474	4.09295		72.5899	0.139124	5.13912		97.6331	0.010403	5.0104
1824.36	69.7398	0.15652	0.15652		91.5909	0.0381477	1.03815		83.2152	0.0797972	2.0798		94.3452	0.0252803	3.02528		80.6258	0.0935261	4.09353		72.6733	0.138625	5.13863		97.4817	0.011077	5.01108
1826.29	69.5358	0.157791	0.157791		91.4568	0.0387839	1.03878		83.1857	0.0799513	2.07995		94.1661	0.0261056	3.02611		80.5374	0.0940022	4.094		72.6669	0.138664	5.13866		97.3056	0.011862	5.01186
1828.22	69.367	0.158847	0.158847		91.3746	0.0391747	1.03917		83.1699	0.0800337	2.08003		94.0127	0.0268132	3.02681		80.4113	0.0946831	4.09468		72.4995	0.139665	5.13967		97.1336	0.0126305	5.01263
1830.14	69.2177	0.159783	0.159783		91.3932	0.039086	1.03909		83.2323	0.0797082	2.07971		94.0468	0.0266559	3.02666		80.3592	0.0949644	4.09496		72.3998	0.140263	5.14026		97.006	0.0132014	5.0132
1832.07	69.1205	0.160393	0.160393		91.4597	0.0387704	1.03877		83.445	0.0785995	2.0786		93.9878	0.0269285	3.02693		80.4221	0.0946246	4.09462		72.3537	0.140539	5.14054		97.0556	0.0129793	5.01298
1834	69.1584	0.160155	0.160155		91.4863	0.038644	1.03864		83.5595	0.0780041	2.078		93.8755	0.0274476	3.02745		80.4791	0.0943167	4.09432		72.3577	0.140515	5.14052		97.1051	0.012758	5.01276
1835.93	69.2492	0.159585	0.159585		91.5271	0.0384505	1.03845		83.6769	0.0773943	2.07739		93.864	0.027501	3.0275		80.5275	0.094056	4.09406		72.4015	0.140253	5.14025		97.1428	0.0125893	5.01259
1837.86	69.3363	0.15904	0.15904		91.6092	0.038061	1.03806		83.8915	0.076282	2.07628		93.9476	0.0271142	3.02711		80.599	0.0936704	4.09367		72.4792	0.139787	5.13979		97.1895	0.0123807	5.01238
1839.79	69.4002	0.158639	0.158639		91.6861	0.0376966	1.0377		84.0261	0.0755857	2.07559		94.0495	0.0266435	3.02664		80.6641	0.0933199	4.09332		72.5642	0.139278	5.13928		97.1796	0.0124249	5.01242
1841.72	69.4674	0.158219	0.158219		91.7235	0.0375195	1.03752		84.1439	0.0749776	2.07498		94.0529	0.026628	3.02663		80.711	0.0930675	4.09307		72.5939	0.1391	5.1391		97.0835	0.0128546	5.01285
1843.64	69.4733	0.158182	0.158182		91.7814	0.0372456	1.03725		84.1882	0.0747489	2.07475		94.022	0.0267704	3.02677		80.8026	0.0925747	4.09257		72.7774	0.138003	5.138		97.0765	0.0128858	5.01289
1845.57	69.5119	0.157941	0.157941		91.8576	0.036885	1.03688		84.0628	0.0753963	2.0754		93.8714	0.0274667	3.02747		80.8346	0.0924026	4.0924		73.0146	0.13659	5.13659		96.9505	0.0134499	5.01345
1847.5	69.6369	0.15716	0.15716		91.9348	0.03652	1.03652		84.0464	0.0754807	2.07548		93.8572	0.0275325	3.02753		80.8842	0.0921364	4.09214		73.1471	0.135803	5.1358		96.7965	0.0141404	5.01414
1849.43	69.8442	0.155869	0.155869		91.9788	0.0363121	1.03631		84.1665	0.0748609	2.07486		93.9521	0.0270936	3.02709		80.9524	0.09177	4.09177		73.2034	0.135469	5.13547		96.671	0.0147038	5.0147
1851.36	69.9533	0.155192	0.155192		91.9937	0.0362417	1.03624		84.3488	0.073921	2.07392		94.0122	0.0268157	3.02682		81.0124	0.0914484	4.09145		73.1929	0.135531	5.13553		96.5088	0.015433	5.01543
1853.29	69.9224	0.155384	0.155384		92.0906	0.0357847	1.03578		84.5598	0.0728362	2.07284		94.1298	0.0262728	3.02627		81.0401	0.0913001	4.0913		73.0894	0.136146	5.13615		96.2934	0.0164037	5.0164
1855.21	69.8531	0.155814	0.155814		92.1548	0.0354819	1.03548		84.6672	0.072285	2.07228		94.3806	0.0251172	3.02512		81.0836	0.0910668	4.09107		72.8849	0.137363	5.13736		96.1986	0.0168314	5.01683
1857.14	69.8106	0.156079	0.156079		92.1785	0.0353704	1.03537		84.6452	0.0723975	2.0724		94.563	0.0242787	3.02428		81.1287	0.0908254	4.09083		72.742	0.138215	5.13821		96.2043	0.0168054	5.01681
1859.07	69.8666	0.15573	0.15573		92.1404	0.0355497	1.03555		84.5146	0.0730684	2.07307		94.486	0.0246325	3.02463		81.1845	0.0905271	4.09053		72.7909	0.137923	5.13792		96.2701	0.0165086	5.01651
1861	70.023	0.154759	0.154759		92.0986	0.0357469	1.03575		84.1357	0.0750197	2.07502		94.4306	0.0248873	3.02489		81.2023	0.0904317	4.09043		72.9921	0.136724	5.13672		96.2631	0.0165401	5.01654
1862.93	70.1866	0.153746	0.153746		92.0314	0.036064	1.03606		83.8882	0.0762993	2.0763		94.4748	0.0246841	3.02468		81.1879	0.0905085	4.09051		73.0901	0.136141	5.13614		96.2526	0.0165875	5.01659
1864.86	70.2934	0.153086	0.153086		91.9729	0.0363403	1.03634		83.8109	0.0766993	2.0767		94.4833	0.0246449	3.02464		81.1357	0.0907882	4.09079		73.0357	0.136465	5.13646		96.2122	0.01677	5.01677
1866.79	70.3066	0.153004	0.153004		91.9522	0.0364378	1.03644		83.6621	0.0774714	2.07747		94.4858	0.0246335	3.02463		81.0363	0.0913205	4.09132		72.9822	0.136783	5.13678		96.1642	0.0169865	5.01699
1868.71	70.3227	0.152904	0.152904		91.9153	0.036612	1.03661		83.5809	0.0778928	2.07789		94.323	0.0253823	3.02538		80.9306	0.0918875	4.09189		73.0032	0.136658	5.13666		96.0564	0.0174736	5.01747
1870.64	70.3356	0.152825	0.152825		91.9257	0.0365628	1.03656		83.6234	0.0776723	2.07767		94.119	0.0263228	3.02632		80.8711	0.0922065	4.09221		73.0167	0.136578	5.13658		96.0189	0.0176431	5.01764
1872.57	70.3945	0.152462	0.152462		91.9082	0.0366456	1.03665		83.6572	0.0774968	2.0775		94.0489	0.0266465	3.02665		80.8808	0.0921547	4.09215		72.9951	0.136707	5.13671		95.9381	0.0180091	5.01801
1874.5	70.4289	0.152249	0.152249		91.8659	0.0368459	1.03685		83.7588	0.0769693	2.07697		94.0503	0.0266399	3.02664		80.9236	0.0919245	4.09192		72.9857	0.136763	5.13676		95.8527	0.0183956	5.0184
1876.43	70.3377	0.152812	0.152812		91.8877	0.0367428	1.03674		84.0118	0.0756596	2.07566		94.0441	0.0266683	3.02667		80.9948	0.0915427	4.09154		73.0091	0.136623	5.13662		95.7555	0.018836	5.01884
1878.36	70.1453	0.154001	0.154001		91.9272	0.036556	1.03656		84.3279	0.0740289	2.07403		93.9128	0.027275	3.02728		81.0354	0.0913251	4.09133		72.9956	0.136703	5.1367		95.6263	0.0194226	5.01942
1880.29	69.9087	0.155469	0.155469		91.9472	0.0364615	1.03646		84.6102	0.0725771	2.07258		93.8786	0.0274332	3.02743		81.0851	0.0910589	4.09106		72.9974	0.136692	5.13669		95.4972	0.0200094	5.02001
1882.21	69.8148	0.156053	0.156053		91.8482	0.0369293	1.03693		84.6479	0.072384	2.07238		93.9508	0.0270996	3.0271		81.1908	0.0904929	4.09049		73.1337	0.135882	5.13588		95.5161	0.0199234	5.01992
1884.14	69.8127	0.156066	0.156066		91.7189	0.037541	1.03754		84.4068	0.0736228	2.07362		94.0265	0.0267496	3.02675		81.2354	0.0902547	4.09025		73.3333	0.134699	5.1347		95.5461	0.0197869	5.01979
1886.07	69.7502	0.156455	0.156455		91.6724	0.0377616	1.03776		84.1196	0.0751029	2.0751		94.1367	0.0262409	3.02624		81.233	0.0902677	4.09027		73.5676	0.133313	5.13331		95.5494	0.0197719	5.01977
1888	69.7348	0.156551	0.156551		91.7181	0.0375451	1.03755		83.8559	0.0764666	2.07647		94.3133	0.0254271	3.02543		81.2597	0.0901248	4.09012		73.677	0.132668	5.13267		95.5114	0.0199447	5.01994
1889.93	69.8711	0.155702	0.155702		91.7791	0.0372563	1.03726		83.8164	0.0766709	2.07667		94.4885	0.0246209	3.02462		81.3074	0.0898701	4.08987		73.5315	0.133527	5.13353		95.4992	0.0200004	5.02
1891.86	70.0768	0.154426	0.154426		91.8718	0.0368175	1.03682		83.9485	0.0759868	2.07599		94.6263	0.0239881	3.02399		81.2769	0.0900329	4.09003		73.2626	0.135118	5.13512		95.4769	0.0201016	5.0201
1893.79	70.2345	0.15345	0.15345		91.9731	0.0363393	1.03634		83.958	0.075938	2.07594		94.7515	0.0234141	3.02341		81.2362	0.0902502	4.09025		73.0965	0.136104	5.1361		95.4179	0.0203704	5.02037
1895.71	70.3027	0.153028	0.153028		92.0978	0.0357505	1.03575		84.0868	0.0752721	2.07527		94.8331	0.0230401	3.02304		81.3433	0.0896784	4.08968		73.1824	0.135594	5.13559		95.2576	0.0211004	5.0211
1897.64	70.4172	0.152321	0.152321		92.2504	0.0350318	1.03503		84.3013	0.0741655	2.07417		94.7819	0.0232745	3.02327		81.5	0.0888424	4.08884		73.3216	0.134768	5.13477		95.1169	0.0217425	5.02174
1899.57	70.6323	0.150997	0.150997		92.3484	0.0345706	1.03457		84.5041	0.0731224	2.07312		94.6368	0.0239401	3.02394		81.6247	0.0881786	4.08818		73.4162	0.134208	5.13421		94.873	0.0228573	5.02286
1901.5	70.7998	0.149968	0.149968		92.4206	0.0342311	1.03423		84.7226	0.0720009	2.072		94.4423	0.0248336	3.02483		81.6742	0.0879152	4.08792		73.499	0.133719	5.13372		94.6229	0.0240036	5.024
1903.43	70.9074	0.149308	0.149308		92.5974	0.0334013	1.0334		84.879	0.0711996	2.0712		94.2833	0.0255653	3.02557		81.7506	0.0875091	4.08751		73.6698	0.13271	5.13271		94.3687	0.0251721	5.02517
1905.36	70.9885	0.148812	0.148812		92.701	0.0329158	1.03292		84.9379	0.0708983	2.0709		94.0832	0.0264879	3.02649		81.7301	0.0876182	4.08762		73.7469	0.132256	5.13226		94.0975	0.0264221	5.02642
1907.29	70.9718	0.148914	0.148914		92.7138	0.0328554	1.03286		84.9939	0.0706122	2.07061		93.8778	0.027437	3.02744		81.6078	0.0882685	4.08827		73.8917	0.131404	5.1314		93.7263	0.0281387	5.02814
1909.21	70.8003	0.149965	0.149965		92.5925	0.033424	1.03342		84.9017	0.0710838	2.07108		93.7318	0.0281129	3.02811		81.5265	0.0887013	4.0887		74.2419	0.129351	5.12935		93.4944	0.0292144	5.02921
1911.14	70.65	0.150888	0.150888		92.3955	0.0343491	1.03435		84.7035	0.0720989	2.0721		93.6511	0.0284871	3.02849		81.4649	0.0890293	4.08903		74.5299	0.12767	5.12767		93.364	0.0298207	5.02982
1913.07	70.766	0.150176	0.150176		92.3643	0.0344958	1.0345		84.6248	0.0725025	2.0725		93.5178	0.0291059	3.02911		81.4064	0.0893417	4.08934		74.6917	0.126728	5.12673		93.3676	0.0298036	5.0298
1915	70.957	0.149005	0.149005		92.4593	0.0340496	1.03405		84.5823	0.0727206	2.07272		93.3373	0.0299448	3.02994		81.3967	0.0893933	4.08939		74.7435	0.126427	5.12643		93.4483	0.0294285	5.02943
1916.93	71.0515	0.148427	0.148427		92.5959	0.0334082	1.03341		84.5549	0.0728614	2.07286		92.9808	0.0316067	3.03161		81.4265	0.0892343	4.08923		74.4405	0.12819	5.12819		93.5882	0.028779	5.02878
1918.86	71.143	0.147868	0.147868		92.6252	0.0332707	1.03327		84.4865	0.0732126	2.07321		92.5774	0.033495	3.0335		81.4561	0.0890764	4.08908		74.2806	0.129125	5.12912		93.6686	0.0284062	5.02841
1920.78	71.2493	0.147219	0.147219		92.4451	0.0341162	1.03412		84.6401	0.0724238	2.07242		92.4928	0.0338923	3.03389		81.553	0.0885602	4.08856		74.5749	0.127408	5.12741		93.828	0.0276677	5.02767
1922.71	71.4145	0.146214	0.146214		92.3032	0.0347831	1.03478		84.9658	0.070756	2.07076		92.6408	0.0331977	3.0332		81.7167	0.0876891	4.08769		74.8178	0.125995	5.126		94.0781	0.0265113	5.02651
1924.64	71.8485	0.143582	0.143582		92.2769	0.0349072	1.03491		85.0883	0.0701303	2.07013		92.4783	0.0339603	3.03396		81.7537	0.0874926	4.08749		74.7331	0.126487	5.12649		94.355	0.0252349	5.02523
1926.57	72.3353	0.14065	0.14065		92.3607	0.034513	1.03451		85.0915	0.0701136	2.07011		92.3206	0.0347014	3.0347		81.7005	0.0877752	4.08778		74.6869	0.126756	5.12676		94.4884	0.0246214	5.02462
1928.5	72.6187	0.138952	0.138952		92.5265	0.0337338	1.03373		85.0834	0.0701549	2.07015		92.5874	0.0334482	3.03345		81.6946	0.0878066	4.08781		74.7161	0.126586	5.12659		94.6514	0.0238729	5.02387
1930.43	72.8413	0.137622	0.137622		92.7235	0.0328103	1.03281		85.0657	0.0702456	2.07025		93.132	0.030901	3.0309		82.0139	0.0861124	4.08611		74.7427	0.126431	5.12643		94.7328	0.0234998	5.0235
1932.36	73.0101	0.136617	0.136617		92.8686	0.0321312	1.03213		85.1762	0.0696818	2.06968		93.5347	0.0290271	3.02903		82.4476	0.083822	4.08382		75.1399	0.12413	5.12413		94.6495	0.0238818	5.02388
1934.28	72.9638	0.136893	0.136893		92.9286	0.0318505	1.03185		85.3422	0.0688361	2.06884		93.8389	0.0276169	3.02762		82.7689	0.0821329	4.08213		75.7369	0.120692	5.12069		94.4826	0.024648	5.02465
1936.21	73.19	0.135548	0.135548		92.8764	0.0320946	1.03209		85.5585	0.0677367	2.06774		94.0766	0.0265183	3.02652		83.0869	0.0804673	4.08047		76.2328	0.117858	5.11786		94.4621	0.0247422	5.02474
1938.14	73.5666	0.133319	0.133319		92.8644	0.0321506	1.03215		85.9894	0.0655549	2.06555		94.1223	0.0263076	3.02631		83.3745	0.0789669	4.07897		76.8751	0.114214	5.11421		94.4336	0.0248734	5.02487
1940.07	73.6894	0.132595	0.132595		93.2061	0.0305556	1.03056		86.4008	0.0634823	2.06348		93.8881	0.0273893	3.02739		83.5653	0.0779738	4.07797		77.4589	0.110929	5.11093		94.5335	0.0244142	5.02441
1942	73.571	0.133293	0.133293		93.5632	0.028895	1.02889		86.5833	0.0625661	2.06257		93.724	0.028149	3.02815		83.7969	0.0767722	4.07677		77.7634	0.109225	5.10922		94.5322	0.0244205	5.02442
1943.93	73.3111	0.13483	0.13483		93.6139	0.0286598	1.02866		86.7096	0.061933	2.06193		93.5832	0.0288022	3.0288		83.9859	0.0757934	4.07579		77.5019	0.110688	5.11069		94.4555	0.0247726	5.02477
1945.86	73.5247	0.133567	0.133567		93.7038	0.0282429	1.02824		86.6925	0.0620183	2.06202		93.4003	0.0296515	3.02965		84.0509	0.0754575	4.07546		77.3942	0.111292	5.11129		94.3602	0.025211	5.02521
1947.78	74.1647	0.129803	0.129803		93.7381	0.028084	1.02808		86.674	0.062111	2.06211		93.0544	0.0312632	3.03126		83.839	0.0765537	4.07655		77.4672	0.110882	5.11088		94.4258	0.0249095	5.02491
1949.71	74.5272	0.127685	0.127685		93.6166	0.0286471	1.02865		86.6073	0.0624454	2.06245		92.6067	0.0333578	3.03336		83.3887	0.0788928	4.07889		77.2166	0.112289	5.11229		94.3928	0.0250611	5.02506
1951.64	74.6131	0.127185	0.127185		93.2505	0.0303487	1.03035		86.7027	0.0619676	2.06197		92.1615	0.0354507	3.03545		83.003	0.0809063	4.08091		77.1171	0.112849	5.11285		94.2929	0.0255209	5.02552
1953.57	74.8719	0.125681	0.125681		92.8974	0.0319964	1.032		86.5371	0.0627979	2.0628		91.97	0.0363539	3.03635		82.7053	0.0824664	4.08247		76.951	0.113786	5.11379		94.2672	0.0256393	5.02564
1955.5	75.4925	0.122096	0.122096		92.9362	0.0318149	1.03181		85.8067	0.0664786	2.06648		91.9734	0.0363376	3.03634		82.5507	0.0832794	4.08328		76.4755	0.116478	5.11648		94.5006	0.0245656	5.02457
1957.43	75.6294	0.121309	0.121309		92.9386	0.0318038	1.0318		85.0354	0.0704003	2.0704		91.9595	0.0364034	3.0364		82.8269	0.0818286	4.08183		76.2674	0.117661	5.11766		94.7596	0.0233766	5.02338
1959.35	75.3188	0.123097	0.123097		92.9835	0.0315941	1.03159		84.7955	0.0716271	2.07163		91.471	0.0387167	3.03872		83.4371	0.0786406	4.07864		76.722	0.11508	5.11508		94.8743	0.0228513	5.02285
1961.28	75.4562	0.122305	0.122305		92.9746	0.0316356	1.03164		84.7469	0.0718762	2.07188		90.892	0.0414742	3.04147		84.2168	0.0746012	4.0746		77.5066	0.110661	5.11066		94.9472	0.0225176	5.02252
1963.21	76.3152	0.117389	0.117389		93.0261	0.0313951	1.0314		84.3561	0.0738832	2.07388		90.8444	0.0417021	3.0417		84.8536	0.0713298	4.07133		78.363	0.105889	5.10589		95.3888	0.0205026	5.0205
1965.14	76.7124	0.115134	0.115134		93.5	0.0291885	1.02919		84.0681	0.0753687	2.07537		90.8178	0.0418288	3.04183		85.5741	0.0676575	4.06766		79.2041	0.101253	5.10125		96.0715	0.0174056	5.01741
1967.07	76.4816	0.116443	0.116443		93.9801	0.0269641	1.02696		83.6627	0.0774682	2.07747		89.8636	0.0464164	3.04642		86.1094	0.0649495	4.06495		79.5338	0.0994482	5.09945		96.7897	0.0141706	5.01417
1969	76.6013	0.115764	0.115764		94.2052	0.0259251	1.02593		83.171	0.0800279	2.08003		88.797	0.0516015	3.0516		86.2912	0.0640334	4.06403		79.5041	0.0996104	5.09961		96.8542	0.0138817	5.01388
1970.92	77.1778	0.112508	0.112508		94.1566	0.026149	1.02615		82.7505	0.0822292	2.08223		87.6162	0.0574156	3.05742		86.219	0.0643968	4.0644		78.8677	0.103101	5.1031		96.4531	0.0156837	5.01568
1972.85	77.8358	0.108821	0.108821		93.8473	0.0275781	1.02758		82.2401	0.0849166	2.08492		86.1989	0.0644983	3.0645		85.662	0.067212	4.06721		78.8348	0.103282	5.10328		95.8815	0.018265	5.01827
1974.78	78.1538	0.10705	0.10705		93.1183	0.0309648	1.03096		81.5242	0.0887132	2.08871		84.7176	0.0720264	3.07203		84.8018	0.0715949	4.07159		79.2903	0.10078	5.10078		95.2239	0.0212539	5.02125
1976.71	78.0093	0.107853	0.107853		92.0898	0.0357883	1.03579		81.2071	0.0904059	2.09041		83.5681	0.0779593	3.07796		83.9192	0.0761386	4.07614		79.1112	0.101762	5.10176		94.3663	0.025183	5.02518
1978.64	77.8901	0.108518	0.108518		91.4327	0.0388984	1.0389		81.3816	0.089474	2.08947		83.0374	0.080726	3.08073		83.2728	0.0794967	4.0795		78.0546	0.107601	5.1076		93.6935	0.0282905	5.02829
1980.57	77.8656	0.108655	0.108655		91.4002	0.0390526	1.03905		81.4548	0.0890835	2.08908		82.8582	0.0816646	3.08166		82.695	0.0825207	4.08252		76.3731	0.117059	5.11706		93.2442	0.0303779	5.03038
1982.5	77.5407	0.11047	0.11047		91.5776	0.0382107	1.03821		81.3767	0.0894997	2.0895		82.7465	0.0822502	3.08225		82.3189	0.0845003	4.0845		75.2569	0.123453	5.12345		93.0529	0.0312699	5.03127
1984.42	76.3821	0.117009	0.117009		91.382	0.0391392	1.03914		81.8706	0.0868721	2.08687		83.2138	0.0798044	3.0798		82.2574	0.0848249	4.08482		74.7742	0.126248	5.12625		92.8469	0.0322327	5.03223
1986.35	75.5463	0.121787	0.121787		91.2846	0.0396022	1.0396		83.0942	0.0804291	2.08043		84.143	0.0749818	3.07498		82.3723	0.0842189	4.08422		74.3796	0.128546	5.12855		92.6671	0.0330743	5.03307
1988.28	75.9378	0.119542	0.119542		91.4271	0.038925	1.03892		84.2252	0.0745579	2.07456		85.6894	0.0670727	3.06707		82.7529	0.0822167	4.08222		74.6231	0.127127	5.12713		92.7366	0.0327486	5.03275
1990.21	76.4173	0.116808	0.116808		92.0634	0.0359132	1.03591		84.8591	0.0713016	2.0713		88.0513	0.0552641	3.05526		83.0836	0.0804849	4.08048		74.8309	0.125919	5.12592		93.2785	0.0302184	5.03022
1992.14	76.351	0.117185	0.117185		92.7976	0.0324632	1.03246		85.7733	0.066648	2.06665		89.7708	0.0468651	3.04687		83.4721	0.0784586	4.07846		74.7823	0.126201	5.1262		93.9955	0.0268927	5.02689
1994.07	76.2291	0.117879	0.117879		93.1997	0.0305854	1.03059		86.9476	0.0607422	2.06074		90.2168	0.0447127	3.04471		83.8911	0.0762842	4.07628		75.648	0.121202	5.1212		94.5417	0.0243765	5.02438
1996	76.5077	0.116295	0.116295		93.6415	0.0285318	1.02853		87.9553	0.0557378	2.05574		90.5658	0.0430359	3.04304		84.2922	0.0742127	4.07421		77.5892	0.110199	5.1102		94.4743	0.0246863	5.02469
1997.92	76.9438	0.113826	0.113826		93.9436	0.0271326	1.02713		88.3514	0.0537864	2.05379		90.4825	0.0434355	3.04344		84.477	0.0732613	4.07326		79.0724	0.101975	5.10198		94.3912	0.0250686	5.02507
1999.85	76.8718	0.114233	0.114233		93.5303	0.0290474	1.02905		87.7449	0.0567781	2.05678		89.9753	0.0458766	3.04588		84.1943	0.0747175	4.07472		80.2861	0.0953599	5.09536		94.4989	0.0245732	5.02457
2001.78	76.831	0.114464	0.114464		92.891	0.0320264	1.03203		86.6189	0.0623873	2.06239		89.9249	0.0461199	3.04612		84.2186	0.0745921	4.07459		80.6284	0.0935119	5.09351		94.6133	0.0240479	5.02405
2003.71	77.0039	0.113487	0.113487		92.4005	0.0343256	1.03433		85.9526	0.0657409	2.06574		89.9043	0.0462197	3.04622		84.7271	0.0719778	4.07198		80.1827	0.0959194	5.09592		94.7385	0.0234734	5.02347
2005.64	77.2238	0.112249	0.112249		92.279	0.0348969	1.0349		85.6789	0.0671261	2.06713		89.5248	0.0480567	3.04806		84.8902	0.0711423	4.07114		79.7623	0.0982024	5.0982		94.8301	0.0230537	5.02305
2007.57	77.5652	0.110333	0.110333		92.181	0.0353583	1.03536		85.7727	0.066651	2.06665		89.1923	0.0496729	3.04967		85.0281	0.0704374	4.07044		79.6685	0.0987134	5.09871		94.841	0.0230039	5.023
2009.49	78.069	0.107521	0.107521		91.8632	0.0368586	1.03686		85.8972	0.0660212	2.06602		88.4478	0.0533131	3.05331		84.8602	0.071296	4.0713		79.4103	0.100123	5.10012		95.0732	0.0219419	5.02194
2011.42	78.6226	0.104452	0.104452		91.5474	0.0383541	1.03835		86.2802	0.0640887	2.06409		87.7732	0.0566381	3.05664		84.3478	0.073926	4.07393		79.1419	0.101593	5.10159		94.8823	0.0228149	5.02281
2013.35	78.8749	0.103061	0.103061		91.3608	0.0392401	1.03924		87.239	0.0592894	2.05929		87.6658	0.05717	3.05717		83.7146	0.0771988	4.0772		79.3382	0.100518	5.10052		94.4592	0.0247556	5.02476
2015.28	78.8391	0.103258	0.103258		91.4726	0.0387092	1.03871		88.1399	0.0548274	2.05483		87.7049	0.0569759	3.05698		83.2447	0.0796434	4.07964		79.6163	0.098998	5.099		93.9402	0.0271487	5.02715
2017.21	78.5488	0.104861	0.104861		91.8615	0.0368666	1.03687		88.5791	0.0526687	2.05267		87.5513	0.0577374	3.05774		83.1703	0.0800317	4.08003		79.1082	0.101779	5.10178		93.3337	0.0299613	5.02996
2019.14	78.2389	0.106577	0.106577		92.3507	0.03456	1.03456		88.4537	0.0532838	2.05328		87.0092	0.0604347	3.06043		83.2856	0.0794299	4.07943		79.0191	0.102268	5.10227		92.7587	0.0326453	5.03265
2021.07	77.6569	0.10982	0.10982		93.2186	0.0304973	1.0305		88.5466	0.052828	2.05283		85.8673	0.0661722	3.06617		83.3533	0.079077	4.07908		79.8928	0.0974925	5.09749		92.3367	0.0346257	5.03463
2022.99	76.9963	0.11353	0.11353		94.2417	0.0257567	1.02576		88.5641	0.0527422	2.05274		84.3896	0.0737109	3.07371		83.4718	0.0784604	4.07846		80.35	0.0950138	5.09501		91.8867	0.0367474	5.03675
2024.92	76.485	0.116424	0.116424		94.5187	0.0244821	1.02448		87.592	0.0575358	2.05754		82.8917	0.081489	3.08149		83.1576	0.0800983	4.0801		79.4902	0.0996863	5.09969		91.5617	0.0382861	5.03829
2026.85	76.0185	0.119081	0.119081		93.6803	0.0283518	1.02835		85.8268	0.0663772	2.06638		82.1193	0.0855548	3.08555		82.782	0.0820641	4.08206		78.8933	0.10296	5.10296		91.2974	0.0395417	5.03954
2028.78	75.6859	0.120985	0.120985		92.9069	0.031952	1.03195		84.7229	0.0719992	2.072		82.1544	0.0853692	3.08537		82.6724	0.0826392	4.08264		78.7318	0.10385	5.10385		91.1908	0.0400487	5.04005
2030.71	75.3785	0.122753	0.122753		92.469	0.0340037	1.034		83.9323	0.0760707	2.07607		81.9448	0.0864788	3.08648		82.6712	0.0826456	4.08265		78.7856	0.103553	5.10355		91.2487	0.0397733	5.03977
2032.64	75.3447	0.122947	0.122947		92.133	0.0355848	1.03558		83.0466	0.0806784	2.08068		81.7093	0.0877283	3.08773		82.2209	0.0850179	4.08502		78.6732	0.104173	5.10417		91.5975	0.0381163	5.03812
2034.57	75.4576	0.122297	0.122297		91.775	0.0372754	1.03728		82.508	0.0835039	2.0835		82.2166	0.0850404	3.08504		82.1586	0.0853469	4.08535		78.0459	0.10765	5.10765		92.1526	0.0354923	5.03549
2036.49	75.2396	0.123553	0.123553		91.3599	0.0392446	1.03924		82.1328	0.0854835	2.08548		82.9142	0.0813712	3.08137		82.1469	0.0854088	4.08541		77.2833	0.111914	5.11191		92.564	0.0335581	5.03356
2038.42	74.5933	0.1273	0.1273		90.8258	0.0417907	1.04179		81.702	0.0877673	2.08777		83.7271	0.0771338	3.07713		81.8785	0.0868301	4.08683		76.8004	0.114636	5.11464		92.4442	0.0341203	5.03412
2040.35	73.5682	0.13331	0.13331		90.2723	0.0444454	1.04445		81.4302	0.0892146	2.08921		84.7452	0.071885	3.07189		81.457	0.0890714	4.08907		76.2346	0.117848	5.11785		92.24	0.0350806	5.03508
2042.28	72.6822	0.138572	0.138572		90.0807	0.0453681	1.04537		81.1102	0.0909246	2.09092		85.6308	0.0673697	3.06737		81.0774	0.0911003	4.0911		74.891	0.125571	5.12557		91.9767	0.0363223	5.03632
2044.21	72.1772	0.1416	0.1416		90.1828	0.0448764	1.04488		80.3637	0.09494	2.09494		86.0362	0.065319	3.06532		81.0459	0.0912689	4.09127		73.1267	0.135924	5.13592		91.422	0.0389493	5.03895
2046.14	71.7237	0.144337	0.144337		90.6427	0.042667	1.04267		79.3969	0.100196	2.1002		86.3383	0.0637964	3.0638		80.9603	0.091728	4.09173		72.1596	0.141706	5.14171		90.6543	0.0426118	5.04261
2048.07	71.0419	0.148486	0.148486		91.1617	0.0401875	1.04019		79.4163	0.10009	2.10009		86.3827	0.0635731	3.06357		80.6247	0.0935321	4.09353		71.218	0.147411	5.14741		89.9755	0.0458758	5.04588
2049.99	70.8033	0.149947	0.149947		91.3221	0.0394243	1.03942		80.1718	0.0959785	2.09598		86.4149	0.0634113	3.06341		80.5415	0.0939802	4.09398		70.0999	0.154282	5.15428		89.2294	0.0494921	5.04949
2051.92	71.2218	0.147387	0.147387		91.0871	0.0405429	1.04054		80.4429	0.0945122	2.09451		86.7536	0.0617126	3.06171		80.264	0.0954794	4.09548		69.7533	0.156435	5.15644		88.4985	0.0530639	5.05306
2053.85	71.7203	0.144358	0.144358		90.9954	0.0409807	1.04098		80.4921	0.0942465	2.09425		87.159	0.059688	3.05969		80.0227	0.0967869	4.09679		70.5916	0.151247	5.15125		87.9191	0.0559166	5.05592
2055.78	71.9908	0.142723	0.142723		91.3952	0.0390766	1.03908		81.1748	0.0905789	2.09058		87.2207	0.0593804	3.05938		79.9508	0.0971773	4.09718		71.2342	0.147311	5.14731		87.5845	0.0575725	5.05757
2057.71	72.2633	0.141082	0.141082		91.8062	0.0371281	1.03713		81.5711	0.0884638	2.08846		87.467	0.058156	3.05816		80.1488	0.0961032	4.0961		71.6633	0.144703	5.1447		87.559	0.0576991	5.0577
2059.64	72.5202	0.139541	0.139541		92.0112	0.0361591	1.03616		81.6759	0.087906	2.08791		88.0884	0.0550812	3.05508		80.4007	0.0947401	4.09474		72.2389	0.141229	5.14123		87.8865	0.0560776	5.05608
2061.57	72.6626	0.138689	0.138689		92.0759	0.035854	1.03585		81.8264	0.0871066	2.08711		88.9876	0.0506704	3.05067		80.8164	0.0925006	4.0925		72.8114	0.1378	5.1378		88.105	0.0549994	5.055
2063.49	72.8744	0.137425	0.137425		92.0376	0.0360345	1.03603		81.7998	0.0872478	2.08725		89.8615	0.0464265	3.04643		81.2294	0.0902866	4.09029		73.3606	0.134537	5.13454		88.1177	0.0549366	5.05494
2065.42	73.0559	0.136345	0.136345		91.9432	0.0364804	1.03648		81.6279	0.0881614	2.08816		90.1972	0.0448068	3.04481		81.1816	0.0905423	4.09054		73.5777	0.133254	5.13325		88.1388	0.0548329	5.05483
2067.35	73.0784	0.136211	0.136211		91.8811	0.0367736	1.03677		81.4607	0.0890518	2.08905		90.141	0.0450776	3.04508		80.8959	0.0920733	4.09207		73.722	0.132403	5.1324		88.0847	0.0550994	5.0551
2069.28	72.8426	0.137615	0.137615		91.7005	0.0376282	1.03763		81.1736	0.0905851	2.09059		90.1095	0.0452295	3.04523		80.7414	0.0929038	4.0929		73.7186	0.132423	5.13242		87.8693	0.0561628	5.05616
2071.21	72.37	0.140441	0.140441		91.3606	0.0392411	1.03924		80.6386	0.0934569	2.09346		89.9027	0.0462275	3.04623		80.6556	0.0933654	4.09337		73.5892	0.133186	5.13319		87.452	0.0582301	5.05823
2073.14	71.815	0.143785	0.143785		91.0198	0.0408641	1.04086		80.3495	0.0950169	2.09502		89.7237	0.0470927	3.04709		80.4961	0.0942251	4.09423		73.7134	0.132453	5.13245		86.9148	0.0609065	5.06091
2075.06	71.337	0.146685	0.146685		90.6629	0.0425703	1.04257		80.7622	0.0927916	2.09279		89.7497	0.046967	3.04697		80.3485	0.0950223	4.09502		73.5953	0.13315	5.13315		86.4893	0.0630376	5.06304
2076.99	71.2195	0.147401	0.147401		90.3572	0.0440371	1.04404		81.3647	0.0895639	2.08956		89.9206	0.0461407	3.04614		80.4021	0.0947329	4.09473		73.1836	0.135586	5.13559		86.2739	0.0641204	5.06412
2078.92	71.4094	0.146245	0.146245		90.3524	0.0440602	1.04406		81.5784	0.0884249	2.08842		90.1257	0.0451515	3.04515		80.5288	0.0940488	4.09405		72.8194	0.137753	5.13775		86.3372	0.0638022	5.0638
2080.85	71.4104	0.146238	0.146238		90.5896	0.0429218	1.04292		81.574	0.0884484	2.08845		90.3406	0.044117	3.04412		80.7528	0.0928422	4.09284		72.6065	0.139024	5.13902		86.5087	0.06294	5.06294
2082.78	71.2871	0.146989	0.146989		90.7718	0.0420491	1.04205		81.7688	0.0874124	2.08741		90.4892	0.0434033	3.0434		81.0306	0.0913508	4.09135		72.4358	0.140047	5.14005		86.6963	0.0619996	5.062
2084.71	71.3748	0.146455	0.146455		90.92	0.0413407	1.04134		81.7728	0.0873913	2.08739		90.7227	0.0422843	3.04228		81.1847	0.0905259	4.09053		72.6619	0.138693	5.13869		87.0273	0.0603444	5.06034
2086.64	71.4597	0.145939	0.145939		91.0789	0.0405822	1.04058		81.7352	0.0875906	2.08759		90.8253	0.0417932	3.04179		81.2379	0.0902413	4.09024		73.1871	0.135565	5.13557		87.3509	0.0587324	5.05873
2088.56	71.4746	0.145848	0.145848		91.3781	0.039158	1.03916		81.6405	0.0880941	2.08809		91.0625	0.0406605	3.04066		81.3742	0.0895131	4.08951		73.6299	0.132946	5.13295		87.4241	0.0583686	5.05837
2090.49	71.14	0.147886	0.147886		91.7466	0.0374102	1.03741		81.3905	0.0894263	2.08943		91.6034	0.0380884	3.03809		81.4687	0.0890092	4.08901		73.398	0.134316	5.13432		87.7139	0.0569315	5.05693
2092.42	70.9569	0.149006	0.149006		91.896	0.0367033	1.0367		81.1628	0.0906431	2.09064		91.7951	0.0371804	3.03718		81.4933	0.0888779	4.08888		73.1682	0.135678	5.13568		88.1976	0.0545435	5.05454
2094.35	71.4248	0.146151	0.146151		91.9347	0.0365208	1.03652		82.1384	0.0854539	2.08545		90.9301	0.0412924	3.04129		81.5675	0.0884826	4.08848		73.8274	0.131782	5.13178		88.0545	0.0552483	5.05525
2096.28	71.7073	0.144437	0.144437		91.8739	0.0368081	1.03681		83.3778	0.0789495	2.07895		89.8071	0.0466894	3.04669		81.6497	0.0880456	4.08805		74.9016	0.125509	5.12551		87.5108	0.0579384	5.05794
2098.21	71.8693	0.143457	0.143457		91.7823	0.0372413	1.03724		84.4703	0.0732962	2.0733		88.9288	0.0509574	3.05096		81.6103	0.0882552	4.08826		76.0064	0.11915	5.11915		86.7562	0.0616996	5.0617
2100.14	72.1938	0.1415	0.1415		91.7272	0.0375017	1.0375		85.5541	0.067759	2.06776		88.2882	0.0540974	3.0541		81.3868	0.089446	4.08945		76.765	0.114837	5.11484		85.9924	0.0655401	5.06554
2102.06	72.3161	0.140765	0.140765		91.5623	0.0382833	1.03828		86.1737	0.0646254	2.06463		87.8628	0.0561949	3.05619		81.2766	0.0900343	4.09003		77.0978	0.112958	5.11296		85.4188	0.0684467	5.06845
2103.99	72.3735	0.14042	0.14042		91.2834	0.0396084	1.03961		86.3108	0.0639349	2.06393		87.5402	0.0577924	3.05779		81.3331	0.0897326	4.08973		77.0703	0.113113	5.11311		85.0636	0.0702564	5.07026
2105.92	72.5205	0.139539	0.139539		91.0564	0.0406895	1.04069		86.4546	0.0632121	2.06321		87.3799	0.0585882	3.05859		81.3284	0.0897578	4.08976		76.8853	0.114157	5.11416		84.9874	0.0706455	5.07065
2107.85	72.6488	0.138772	0.138772		90.9474	0.0412099	1.04121		86.164	0.0646742	2.06467		87.5045	0.0579695	3.05797		81.2739	0.0900491	4.09005		76.6343	0.115577	5.11558		85.0283	0.0704367	5.07044
2109.78	72.6836	0.138564	0.138564		90.7371	0.0422149	1.04221		85.555	0.0677549	2.06775		87.9103	0.0559603	3.05596		81.2811	0.0900104	4.09001		76.1503	0.118328	5.11833		85.0825	0.0701596	5.07016
2111.71	72.6428	0.138807	0.138807		90.6039	0.0428529	1.04285		84.8425	0.0713865	2.07139		88.4855	0.053128	3.05313		81.2059	0.0904124	4.09041		75.4304	0.122454	5.12245		85.1828	0.069648	5.06965
2113.63	72.203	0.141445	0.141445		90.721	0.0422921	1.04229		83.9543	0.0759572	2.07596		89.1389	0.0499327	3.04993		81.1271	0.0908339	4.09083		74.536	0.127634	5.12763		85.3952	0.0685663	5.06857
2115.56	71.474	0.145852	0.145852		90.9927	0.0409933	1.04099		82.938	0.0812463	2.08125		90.1873	0.0448545	3.04485		81.0774	0.0911001	4.0911		73.4058	0.13427	5.13427		85.7127	0.0669546	5.06695
2117.49	70.9849	0.148834	0.148834		91.2299	0.0398629	1.03986		82.1004	0.0856548	2.08565		91.2775	0.0396361	3.03964		80.8671	0.0922283	4.09223		72.096	0.142089	5.14209		86.3863	0.0635553	5.06356
2119.42	71.4518	0.145987	0.145987		91.3829	0.039135	1.03914		81.8385	0.0870424	2.08704		91.7314	0.0374822	3.03748		81.0055	0.0914853	4.09149		71.8272	0.143711	5.14371		86.9355	0.060803	5.0608
2121.35	72.482	0.13977	0.13977		92.0722	0.0358713	1.03587		83.0492	0.0806648	2.08066		91.7939	0.037186	3.03719		81.8233	0.0871231	4.08712		72.6621	0.138692	5.13869		86.9799	0.0605812	5.06058
2123.28	73.1326	0.135889	0.135889		92.9901	0.0315631	1.03156		84.0364	0.0755324	2.07553		92.4573	0.034059	3.03406		82.7396	0.0822866	4.08229		73.6557	0.132794	5.13279		87.0046	0.0604577	5.06046
2125.2	73.66	0.132768	0.132768		93.7065	0.0282305	1.02823		84.5438	0.0729182	2.07292		93.2792	0.0302154	3.03022		83.4772	0.0784319	4.07843		74.4066	0.128389	5.12839		87.0018	0.060472	5.06047
2127.13	74.1677	0.129785	0.129785		94.3226	0.0253843	1.02538		84.9839	0.0706633	2.07066		93.98	0.0269646	3.02696		83.8723	0.0763814	4.07638		75.1463	0.124092	5.12409		86.9415	0.0607728	5.06077
2129.06	74.2221	0.129467	0.129467		94.8093	0.0231492	1.02315		85.2911	0.0690963	2.0691		94.378	0.0251294	3.02513		84.2536	0.0744113	4.07441		75.9943	0.119219	5.11922		86.8834	0.0610632	5.06106
2130.99	74.2415	0.129353	0.129353		95.1313	0.0216763	1.02168		85.8974	0.06602	2.06602		94.29	0.0255344	3.02553		84.5868	0.0726975	4.0727		76.9019	0.114063	5.11406		86.7087	0.0619372	5.06194
2132.92	74.3276	0.12885	0.12885		94.8371	0.023022	1.02302		86.4349	0.0633107	2.06331		94.0178	0.0267901	3.02679		84.8645	0.0712739	4.07127		77.7285	0.109419	5.10942		86.7569	0.061696	5.0617
2134.85	74.4278	0.128265	0.128265		94.4173	0.0249485	1.02495		86.4613	0.0631783	2.06318		93.9886	0.0269249	3.02692		85.2086	0.0695165	4.06952		78.393	0.105723	5.10572		86.9569	0.0606962	5.0607
2136.78	74.7345	0.126479	0.126479		93.9083	0.0272959	1.0273		86.4496	0.0632371	2.06324		94.42	0.0249361	3.02494		85.1915	0.0696036	4.0696		78.9298	0.102759	5.10276		87.2786	0.0590923	5.05909
2138.7	74.9146	0.125434	0.125434		93.5502	0.0289553	1.02896		86.5685	0.0626401	2.06264		94.3755	0.0251407	3.02514		84.9147	0.0710173	4.07102		78.9327	0.102743	5.10274		87.555	0.0577189	5.05772
2140.63	74.5576	0.127508	0.127508		92.943	0.0317832	1.03178		86.341	0.0637829	2.06378		93.6154	0.0286525	3.02865		84.8122	0.0715415	4.07154		78.4085	0.105637	5.10564		87.8976	0.0560231	5.05602
2142.56	74.1942	0.12963	0.12963		92.0311	0.0360653	1.03607		86.0067	0.0654676	2.06547		93.0798	0.0311447	3.03114		84.7879	0.0716662	4.07167		77.8397	0.108799	5.1088		88.0176	0.0554304	5.05543
2144.49	74.8415	0.125857	0.125857		91.4907	0.0386229	1.03862		86.3417	0.0637793	2.06378		92.7284	0.032787	3.03279		84.6146	0.0725549	4.07255		78.878	0.103044	5.10304		88.6525	0.0523091	5.05231
2146.42	76.7452	0.114948	0.114948		91.8453	0.0369433	1.03694		87.0677	0.0601431	2.06014		92.6603	0.0331061	3.03311		85.1607	0.0697608	4.06976		81.6401	0.0880965	5.0881		89.9438	0.0460289	5.04603
2148.35	78.3969	0.105701	0.105701		92.6454	0.033176	1.03318		87.6736	0.0571314	2.05713		92.0515	0.035969	3.03597		86.0472	0.0652634	4.06526		83.9005	0.0762355	5.07624		91.1211	0.040381	5.04038
2150.28	79.898	0.097464	0.097464		92.861	0.0321666	1.03217		87.52	0.0578925	2.05789		91.1707	0.0401445	3.04014		86.3493	0.0637412	4.06374		85.1999	0.0695611	5.06956		92.0732	0.0358669	5.03587
2152.2	81.1891	0.0905025	0.0905025		92.8302	0.0323108	1.03231		87.0868	0.0600474	2.06005		90.3133	0.0442482	3.04425		86.106	0.0649666	4.06497		85.5797	0.0676295	5.06763		92.6948	0.0329447	5.03294
2154.13	82.1486	0.0853999	0.0853999		92.8489	0.0322233	1.03222		86.7347	0.0618072	2.06181		89.8388	0.0465362	3.04654		85.7	0.067019	4.06702		85.0814	0.0701652	5.07017		92.5774	0.0334951	5.0335
2156.06	82.5839	0.0831044	0.0831044		92.5115	0.0338042	1.0338		85.9941	0.0655315	2.06553		89.0315	0.0504564	3.05046		85.1787	0.0696689	4.06967		83.5828	0.0778833	5.07788		92.0051	0.0361882	5.03619
2157.99	82.0291	0.086032	0.086032		91.7621	0.0373365	1.03734		84.9523	0.0708251	2.07083		87.4735	0.0581237	3.05812		84.5794	0.0727353	4.07274		81.6703	0.087936	5.08794		91.0915	0.0405222	5.04052
2159.92	80.798	0.0925997	0.0925997		90.7075	0.0423569	1.04236		83.7313	0.077112	2.07711		86.214	0.0644222	3.06442		84.0867	0.0752729	4.07527		79.3091	0.100677	5.10068		90.1531	0.0450191	5.04502
2161.85	78.9264	0.102778	0.102778		89.9366	0.0460633	1.04606		82.5251	0.083414	2.08341		85.4703	0.0681847	3.06818		83.8094	0.0767075	4.07671		77.1988	0.112389	5.11239		89.0415	0.0504077	5.05041
2163.78	77.145	0.112692	0.112692		89.113	0.050059	1.05006		81.5917	0.0883542	2.08835		85.1475	0.0698281	3.06983		83.3273	0.0792126	4.07921		75.2395	0.123554	5.12355		87.9794	0.0556191	5.05562
2165.7	75.4512	0.122334	0.122334		88.1466	0.0547945	1.05479		81.0508	0.0912427	2.09124		84.7752	0.0717311	3.07173		82.9824	0.0810141	4.08101		72.9898	0.136738	5.13674		86.812	0.0614201	5.06142
2167.63	73.603	0.133104	0.133104		86.772	0.0616206	1.06162		81.0669	0.0911563	2.09116		84.9951	0.0706061	3.07061		82.9448	0.0812109	4.08121		70.9298	0.149171	5.14917		85.6679	0.0671818	5.06718
2169.56	71.7907	0.143932	0.143932		85.9802	0.0656015	1.0656		81.9212	0.0866037	2.0866		85.9006	0.066004	3.066		82.7645	0.0821557	4.08216		70.0195	0.154781	5.15478		84.7035	0.0720984	5.0721
2171.49	71.0523	0.148422	0.148422		86.5841	0.0625617	1.06256		83.3556	0.0790654	2.07907		86.7164	0.061899	3.0619		82.4533	0.0837921	4.08379		71.3617	0.146535	5.14653		84.5537	0.0728675	5.07287
2173.42	71.2401	0.147275	0.147275		87.8266	0.056374	1.05637		84.3803	0.073759	2.07376		87.4588	0.0581967	3.0582		82.5234	0.0834228	4.08342		73.1781	0.135619	5.13562		84.8251	0.0714756	5.07148
2175.35	70.8143	0.149879	0.149879		88.8993	0.0511016	1.0511		84.6488	0.0723793	2.07238		87.3854	0.0585613	3.05856		82.5518	0.0832734	4.08327		73.5985	0.133131	5.13313		84.9213	0.0709836	5.07098
2177.28	70.9515	0.149039	0.149039		89.6041	0.0476723	1.04767		84.0438	0.0754942	2.07549		87.4816	0.0580832	3.05808		82.3564	0.0843026	4.0843		73.6844	0.132625	5.13262		85.0221	0.0704681	5.07047
2179.2	71.5966	0.145108	0.145108		90.216	0.0447166	1.04472		83.2389	0.0796737	2.07967		87.7841	0.0565841	3.05658		82.002	0.0861758	4.08618		73.7896	0.132005	5.13201		84.9758	0.070705	5.0707
2181.13	72.165	0.141673	0.141673		90.5222	0.0432448	1.04324		82.512	0.0834831	2.08348		87.8419	0.0562983	3.0563		81.6587	0.0879975	4.088		73.5568	0.133377	5.13338		84.5341	0.072968	5.07297
2183.06	72.6117	0.138993	0.138993		90.5806	0.0429648	1.04296		81.7435	0.0875469	2.08755		87.2954	0.0590087	3.05901		81.3774	0.0894962	4.0895		73.0515	0.136371	5.13637		84.1083	0.0751611	5.07516
2184.99	72.5906	0.139119	0.139119		90.6625	0.0425725	1.04257		81.195	0.0904709	2.09047		86.7558	0.0617015	3.0617		81.3273	0.0897635	4.08976		72.418	0.140154	5.14015		83.8314	0.0765932	5.07659
2186.92	72.6305	0.138881	0.138881		90.7002	0.0423917	1.04239		80.8602	0.0922651	2.09227		86.5178	0.0628945	3.06289		81.4142	0.0893001	4.0893		71.8794	0.143396	5.1434		83.6922	0.0773149	5.07731
2188.85	72.7045	0.138439	0.138439		90.6215	0.0427688	1.04277		80.4251	0.0946084	2.09461		86.2457	0.0642626	3.06426		81.5289	0.0886887	4.08869		72.1167	0.141964	5.14196		83.3464	0.0791134	5.07911
2190.77	73.288	0.134967	0.134967		90.2688	0.0444623	1.04446		80.3441	0.0950462	2.09505		86.0586	0.0652059	3.06521		81.4017	0.0893664	4.08937		72.2386	0.141231	5.14123		83.2505	0.079613	5.07961
2192.7	74.111	0.130117	0.130117		89.6815	0.047297	1.0473		80.7649	0.0927772	2.09278		86.2811	0.0640842	3.06408		81.2225	0.0903237	4.09032		72.1183	0.141954	5.14195		83.3933	0.078869	5.07887
2194.63	74.5359	0.127635	0.127635		89.1146	0.050051	1.05005		81.5262	0.0887027	2.0887		87.2153	0.0594072	3.05941		81.3138	0.0898355	4.08984		71.9427	0.143013	5.14301		83.5475	0.0780667	5.07807
2196.56	74.2988	0.129018	0.129018		89.068	0.0502784	1.05028		82.2995	0.0846029	2.0846		87.9684	0.0556733	3.05567		81.4057	0.0893449	4.08934		71.456	0.145961	5.14596		83.6367	0.0776032	5.0776
2198.49	74.1363	0.129969	0.129969		89.3597	0.0488582	1.04886		82.565	0.0832042	2.0832		88.3627	0.0537309	3.05373		81.4527	0.0890948	4.08909		71.0051	0.148711	5.14871		83.7989	0.0767618	5.07676
2200.42	73.9858	0.130852	0.130852		89.5865	0.0477572	1.04776		82.5747	0.0831528	2.08315		88.9544	0.0508325	3.05083		81.7567	0.0874768	4.08748		70.4968	0.151831	5.15183		84.1666	0.07486	5.07486
2202.34	73.5743	0.133274	0.133274		89.8406	0.0465274	1.04653		82.6481	0.0827671	2.08277		89.0279	0.0504739	3.05047		82.0561	0.0858889	4.08589		70.0127	0.154823	5.15482		84.3915	0.0737013	5.0737
2204.27	73.372	0.13447	0.13447		89.8862	0.0463069	1.04631		82.3878	0.0841369	2.08414		88.839	0.0513961	3.0514		82.0085	0.0861412	4.08614		70.204	0.153638	5.15364		84.222	0.0745744	5.07457
2206.2	73.2359	0.135276	0.135276		89.6677	0.0473637	1.04736		82.0493	0.085925	2.08592		88.6408	0.0523663	3.05237		81.8282	0.0870969	4.0871		70.7921	0.150015	5.15002		84.0486	0.0754698	5.07547
2208.13	72.8126	0.137794	0.137794		89.4671	0.0483368	1.04834		82.2366	0.0849347	2.08493		88.3473	0.0538066	3.05381		81.8432	0.0870175	4.08702		71.1686	0.147712	5.14771		83.9824	0.0758117	5.07581
2210.06	72.2246	0.141315	0.141315		89.4441	0.0484485	1.04845		82.5796	0.0831274	2.08313		88.0402	0.055319	3.05532		81.9496	0.0864533	4.08645		70.9517	0.149037	5.14904		83.931	0.0760775	5.07608
2211.99	71.6494	0.144788	0.144788		89.4347	0.0484937	1.04849		82.7239	0.0823692	2.08237		87.9399	0.0558141	3.05581		81.9846	0.0862678	4.08627		70.4672	0.152013	5.15201		83.8205	0.0766499	5.07665
2213.92	71.3555	0.146573	0.146573		89.3807	0.0487563	1.04876		82.4833	0.0836338	2.08363		87.5851	0.0575696	3.05757		81.752	0.0875014	4.0875		70.1094	0.154224	5.15422		83.6184	0.077698	5.0777
2215.84	71.0352	0.148526	0.148526		89.5536	0.0479171	1.04792		82.0748	0.0857899	2.08579		87.2762	0.0591044	3.0591		81.2075	0.090404	4.0904		69.9669	0.155107	5.15511		83.2194	0.0797753	5.07978
2217.77	70.7334	0.150375	0.150375		89.6247	0.0475721	1.04757		81.7904	0.0872975	2.0873		86.9944	0.0605087	3.06051		80.571	0.0938214	4.09382		69.6168	0.157286	5.15729		83.0371	0.0807276	5.08073
2219.7	70.7421	0.150322	0.150322		89.6483	0.0474577	1.04746		81.4951	0.0888687	2.08887		87.011	0.0604258	3.06043		80.1071	0.0963292	4.09633		69.2803	0.15939	5.15939		82.9216	0.0813322	5.08133
2221.63	70.9766	0.148885	0.148885		89.7713	0.0468625	1.04686		81.1408	0.0907606	2.09076		87.3108	0.0589319	3.05893		79.7851	0.0980784	4.09808		69.2742	0.159428	5.15943		82.6568	0.0827216	5.08272
2223.56	71.0842	0.148227	0.148227		89.7875	0.0467843	1.04678		80.9051	0.0920239	2.09202		87.6045	0.0574738	3.05747		79.4188	0.100077	4.10008		69.1379	0.160284	5.16028		82.3812	0.0841719	5.08417
2225.49	71.1598	0.147765	0.147765		89.6883	0.047264	1.04726		80.7948	0.0926163	2.09262		87.7662	0.0566729	3.05667		79.0289	0.102214	4.10221		69.0237	0.161002	5.161		82.2919	0.0846427	5.08464
2227.42	71.3032	0.146891	0.146891		89.645	0.047474	1.04747		81.0298	0.0913554	2.09136		87.9442	0.0557929	3.05579		78.8394	0.103257	4.10326		69.1092	0.160464	5.16046		82.2585	0.0848192	5.08482
2229.34	71.501	0.145688	0.145688		89.5207	0.0480764	1.04808		81.3846	0.0894579	2.08946		88.1183	0.054934	3.05493		78.6886	0.104088	4.10409		69.3821	0.158753	5.15875		82.0255	0.086051	5.08605
2231.27	71.8303	0.143692	0.143692		89.3173	0.0490646	1.04906		81.4022	0.0893636	2.08936		88.2623	0.0542246	3.05422		78.5705	0.10474	4.10474		69.9625	0.155135	5.15513		81.7395	0.0875679	5.08757
2233.2	72.3757	0.140407	0.140407		89.1156	0.0500463	1.05005		81.2965	0.089928	2.08993		88.443	0.0533365	3.05334		78.7823	0.103571	4.10357		70.4695	0.151999	5.152		81.6109	0.088252	5.08825
2235.13	72.6347	0.138856	0.138856		88.9694	0.0507591	1.05076		81.2251	0.09031	2.09031		88.5578	0.052773	3.05277		79.1749	0.101413	4.10141		70.4889	0.151879	5.15188		81.4879	0.088907	5.08891
2237.06	72.6513	0.138757	0.138757		88.7821	0.0516744	1.05167		81.1505	0.0907086	2.09071		88.4195	0.0534521	3.05345		79.4076	0.100138	4.10014		70.0926	0.154328	5.15433		81.2802	0.090015	5.09002
2238.99	72.7854	0.137956	0.137956		88.6394	0.0523729	1.05237		80.9962	0.0915354	2.09154		88.2652	0.0542104	3.05421		79.6716	0.0986962	4.0987		69.6965	0.156789	5.15679		80.9858	0.091591	5.09159
2240.91	72.8765	0.137413	0.137413		88.6457	0.0523424	1.05234		80.8346	0.0924029	2.0924		88.2805	0.0541351	3.05414		79.8291	0.0978386	4.09784		69.285	0.159361	5.15936		80.7061	0.0930937	5.09309
2242.84	72.6779	0.138597	0.138597		88.7995	0.0515893	1.05159		80.8571	0.0922819	2.09228		88.3758	0.0536664	3.05367		79.7583	0.0982238	4.09822		69.0921	0.160571	5.16057		80.5126	0.094136	5.09414
2244.77	72.4609	0.139896	0.139896		88.8203	0.0514878	1.05149		80.9249	0.0919176	2.09192		88.2637	0.0542181	3.05422		79.5305	0.0994664	4.09947		68.8528	0.162078	5.16208		80.3623	0.0949475	5.09495
2246.7	72.3823	0.140368	0.140368		88.821	0.0514844	1.05148		80.8668	0.0922298	2.09223		88.178	0.0546395	3.05464		79.3201	0.100617	4.10062		68.6951	0.163074	5.16307		80.2319	0.0956531	5.09565
2248.63	72.1372	0.141841	0.141841		88.8383	0.0513996	1.0514		80.7691	0.0927549	2.09275		88.1993	0.0545347	3.05453		79.1396	0.101606	4.10161		68.8107	0.162344	5.16234		80.2482	0.0955646	5.09556
2250.56	71.7189	0.144367	0.144367		88.8213	0.0514827	1.05148		80.8201	0.0924807	2.09248		88.3264	0.0539095	3.05391		78.9432	0.102685	4.10269		68.6218	0.163538	5.16354		80.3726	0.0948918	5.09489
2252.49	71.4085	0.14625	0.14625		88.7412	0.0518745	1.05187		80.9551	0.0917556	2.09176		88.2591	0.0542404	3.05424		78.7929	0.103513	4.10351		68.2628	0.165816	5.16582		80.5324	0.0940293	5.09403
2254.41	71.3087	0.146858	0.146858		88.7094	0.0520306	1.05203		81.0054	0.0914861	2.09149		88.1492	0.0547815	3.05478		78.6963	0.104046	4.10405		68.3092	0.165521	5.16552		80.6968	0.0931439	5.09314
2256.34	71.3078	0.146863	0.146863		88.7344	0.0519081	1.05191		80.8883	0.0921143	2.09211		88.1035	0.0550068	3.05501		78.6485	0.10431	4.10431		68.5495	0.163996	5.164		80.8555	0.0922904	5.09229
2258.27	71.4321	0.146106	0.146106		88.758	0.0517923	1.05179		80.7261	0.092986	2.09299		87.8858	0.0560813	3.05608		78.589	0.104638	4.10464		68.6261	0.163511	5.16351		80.9428	0.0918218	5.09182
2260.2	71.5104	0.145631	0.145631		88.8306	0.0514374	1.05144		80.6896	0.0931823	2.09318		87.7857	0.0565763	3.05658		78.5344	0.10494	4.10494		68.5638	0.163905	5.16391		80.9942	0.0915461	5.09155
2262.13	71.3552	0.146575	0.146575		88.8555	0.0513154	1.05132		80.6748	0.093262	2.09326		87.7854	0.0565777	3.05658		78.3439	0.105995	4.10599		68.4052	0.164911	5.16491		80.9979	0.0915265	5.09153
2264.06	71.1479	0.147838	0.147838		88.7399	0.0518812	1.05188		80.6443	0.0934265	2.09343		87.7412	0.0567967	3.0568		78.0555	0.107596	4.1076		68.3199	0.165453	5.16545		80.9433	0.091819	5.09182
2265.99	70.9756	0.148891	0.148891		88.7155	0.0520006	1.052		80.5308	0.0940378	2.09404		87.8168	0.0564226	3.05642		77.8812	0.108568	4.10857		68.2344	0.165997	5.166		80.7104	0.0930705	5.09307
2267.91	70.7452	0.150303	0.150303		88.8076	0.0515498	1.05155		80.5799	0.0937731	2.09377		87.9985	0.0555249	3.05552		77.6637	0.109782	4.10978		68.1133	0.166768	5.16677		80.4257	0.0946052	5.09461
2269.84	70.4399	0.152182	0.152182		88.8588	0.0512997	1.0513		80.6437	0.0934293	2.09343		88.0427	0.0553068	3.05531		77.3604	0.111481	4.11148		68.0783	0.166991	5.16699		80.1808	0.0959298	5.09593
2271.77	70.0768	0.154426	0.154426		88.7305	0.0519271	1.05193		80.5518	0.0939249	2.09392		88.0144	0.0554461	3.05545		77.0319	0.113329	4.11333		68.0766	0.167002	5.167		79.9271	0.0973062	5.09731
2273.7	69.5848	0.157486	0.157486		88.4886	0.0531127	1.05311		80.3433	0.0950501	2.09505		88.0803	0.0551212	3.05512		76.8594	0.114303	4.1143		67.9734	0.167661	5.16766		79.6419	0.0988584	5.09886
2275.63	68.9996	0.161154	0.161154		88.1973	0.0545448	1.05454		80.0784	0.0964846	2.09648		88.1693	0.0546828	3.05468		76.7756	0.114777	4.11478		67.7204	0.169281	5.16928		79.3428	0.100492	5.10049
2277.56	68.5173	0.1642	0.1642		87.9386	0.0558206	1.05582		79.7684	0.0981692	2.09817		88.1895	0.0545832	3.05458		76.5972	0.115787	4.11579		67.359	0.171605	5.1716		79.0054	0.102343	5.10234
2279.49	68.2325	0.166009	0.166009		87.626	0.057367	1.05737		79.2969	0.100744	2.10074		87.9912	0.0555606	3.05556		76.4531	0.116605	4.1166		67.0881	0.173354	5.17335		78.6973	0.10404	5.10404
2281.41	68.0177	0.167378	0.167378		87.3629	0.0586727	1.05867		78.8583	0.103153	2.10315		87.7246	0.0568787	3.05688		76.4104	0.116848	4.11685		66.9768	0.174076	5.17408		78.5137	0.105055	5.10505
2283.34	67.8172	0.16866	0.16866		87.2203	0.0593822	1.05938		78.7042	0.104002	2.104		87.4116	0.0584311	3.05843		76.4281	0.116747	4.11675		66.7965	0.175246	5.17525		78.4298	0.105519	5.10552
2285.27	67.6561	0.169693	0.169693		87.1193	0.0598857	1.05989		78.6852	0.104107	2.10411		87.2043	0.059462	3.05946		76.4958	0.116362	4.11636		66.6267	0.176352	5.17635		78.3692	0.105855	5.10585
2287.2	67.5194	0.170571	0.170571		87.0897	0.0600331	1.06003		78.7598	0.103696	2.1037		87.1109	0.0599273	3.05993		76.5523	0.116042	4.11604		66.54	0.176917	5.17692		78.4002	0.105683	5.10568
2289.13	67.4561	0.170979	0.170979		87.0623	0.0601698	1.06017		78.9327	0.102743	2.10274		87.126	0.0598523	3.05985		76.6509	0.115483	4.11548		66.5983	0.176537	5.17654		78.4668	0.105314	5.10531
2291.06	67.4336	0.171124	0.171124		87.0938	0.0600128	1.06001		79.0324	0.102195	2.10219		87.3076	0.058948	3.05895		76.8611	0.114294	4.11429		66.8253	0.175059	5.17506		78.5392	0.104914	5.10491
2292.99	67.4899	0.170761	0.170761		87.2173	0.0593974	1.0594		79.1634	0.101476	2.10148		87.6144	0.0574248	3.05742		77.0711	0.113109	4.11311		67.1139	0.173188	5.17319		78.6258	0.104435	5.10443
2294.91	67.6068	0.17001	0.17001		87.4429	0.0582756	1.05828		79.4218	0.10006	2.10006		87.97	0.0556656	3.05567		77.239	0.112163	4.11216		67.3185	0.171866	5.17187		78.7502	0.103749	5.10375
2296.84	67.721	0.169277	0.169277		87.7385	0.0568096	1.05681		79.7192	0.098437	2.09844		88.3214	0.0539339	3.05393		77.4228	0.111131	4.11113		67.4527	0.171	5.171		78.8836	0.103013	5.10301
2298.77	67.8942	0.168168	0.168168		87.9879	0.0555769	1.05558		79.993	0.096948	2.09695		88.6889	0.0521307	3.05213		77.5636	0.110342	4.11034		67.6258	0.169888	5.16989		78.9889	0.102434	5.10243
2300.7	68.0948	0.166886	0.166886		88.1783	0.0546383	1.05464		80.1825	0.0959205	2.09592		89.0983	0.0501307	3.05013		77.644	0.109892	4.10989		67.6777	0.169554	5.16955		79.0197	0.102265	5.10226
2302.63	68.2776	0.165722	0.165722		88.3569	0.0537594	1.05376		80.2701	0.095446	2.09545		89.5023	0.0481658	3.04817		77.6311	0.109964	4.10996		67.6405	0.169793	5.16979		79.0005	0.10237	5.10237
2304.56	68.3896	0.16501	0.16501		88.5398	0.0528616	1.05286		80.2462	0.0955755	2.09558		89.8009	0.0467195	3.04672		77.5344	0.110506	4.11051		67.5887	0.170126	5.17013		78.9558	0.102616	5.10262
2306.48	68.3968	0.164964	0.164964		88.6842	0.052154	1.05215		80.1617	0.0960329	2.09603		89.8254	0.046601	3.0466		77.4696	0.110869	4.11087		67.4784	0.170835	5.17084		78.8631	0.103126	5.10313
2308.41	68.3543	0.165234	0.165234		88.8812	0.0511898	1.05119		80.2344	0.0956396	2.09564		89.7327	0.0470491	3.04705		77.4215	0.111138	4.11114		67.3492	0.171668	5.17167		78.7913	0.103522	5.10352
2310.34	68.3594	0.165202	0.165202		89.0172	0.050526	1.05053		80.3201	0.0951759	2.09518		89.5293	0.0480348	3.04803		77.2783	0.111942	4.11194		67.0916	0.173332	5.17333		78.7656	0.103664	5.10366
2312.27	68.3245	0.165424	0.165424		88.8727	0.0512316	1.05123		80.0879	0.0964329	2.09643		89.0369	0.0504301	3.05043		76.9933	0.113547	4.11355		66.6048	0.176494	5.17649		78.6721	0.104179	5.10418
2314.2	68.2502	0.165896	0.165896		88.5328	0.0528956	1.0529		79.7547	0.0982438	2.09824		88.3847	0.0536227	3.05362		76.6606	0.115428	4.11543		65.9863	0.180546	5.18055		78.5425	0.104895	5.1049
2316.13	68.2267	0.166046	0.166046		88.2056	0.0545041	1.0545		79.4903	0.0996859	2.09969		87.9745	0.055643	3.05564		76.4343	0.116712	4.11671		65.4666	0.18398	5.18398		78.486	0.105208	5.10521
2318.05	68.2423	0.165946	0.165946		87.9388	0.0558195	1.05582		79.3575	0.100412	2.10041		87.7026	0.0569874	3.05699		76.2822	0.117577	4.11758		65.1925	0.185802	5.1858		78.6143	0.104498	5.1045
2319.98	68.2437	0.165937	0.165937		87.8157	0.056428	1.05643		79.346	0.100475	2.10048		87.5696	0.0576466	3.05765		76.2674	0.117661	4.11766		65.1496	0.186089	5.18609		78.8566	0.103162	5.10316
2321.91	68.3335	0.165366	0.165366		87.889	0.0560655	1.05607		79.4881	0.099698	2.0997		87.6483	0.0572566	3.05726		76.4722	0.116496	4.1165		65.0669	0.18664	5.18664		79.1432	0.101586	5.10159
2323.84	68.5398	0.164057	0.164057		88.0176	0.0554305	1.05543		79.8383	0.0977887	2.09779		87.9263	0.0558814	3.05588		76.786	0.114718	4.11472		64.9734	0.187264	5.18726		79.4059	0.100147	5.10015
2325.77	68.8907	0.161839	0.161839		88.1891	0.0545853	1.05459		80.2978	0.0952965	2.0953		88.3199	0.0539417	3.05394		77.2221	0.112258	4.11226		65.0151	0.186986	5.18699		79.6294	0.0989267	5.09893
2327.7	69.3449	0.158986	0.158986		88.517	0.0529733	1.05297		80.8632	0.0922489	2.09225		88.831	0.0514353	3.05144		77.7323	0.109398	4.1094		65.149	0.186092	5.18609		79.8334	0.0978154	5.09782
2329.63	69.9477	0.155226	0.155226		89.001	0.0506051	1.05061		81.4815	0.0889409	2.08894		89.5039	0.0481581	3.04816		78.2852	0.10632	4.10632		65.3153	0.184985	5.18498		80.0192	0.0968055	5.09681
2331.55	70.6682	0.150776	0.150776		89.4548	0.0483965	1.0484		82.2122	0.0850639	2.08506		90.191	0.0448368	3.04484		78.8856	0.103002	4.103		65.6379	0.182845	5.18285		80.2252	0.095689	5.09569
2333.48	71.3189	0.146795	0.146795		89.8774	0.0463494	1.04635		83.0463	0.0806796	2.08068		90.6599	0.0425849	3.04258		79.3875	0.100248	4.10025		66.0238	0.1803	5.1803		80.4394	0.0945313	5.09453
2335.41	71.8688	0.143459	0.143459		90.2517	0.0445448	1.04454		83.7227	0.0771566	2.07716		90.8962	0.0414542	3.04145		79.6575	0.0987734	4.09877		66.4243	0.177673	5.17767		80.5224	0.0940834	5.09408
2337.34	72.1738	0.14162	0.14162		90.3574	0.0440364	1.04404		84.0155	0.0756406	2.07564		90.8756	0.0415526	3.04155		79.6678	0.098717	4.09872		66.7441	0.175587	5.17559		80.3999	0.0947443	5.09474
2339.27	72.0551	0.142335	0.142335		90.1427	0.0450695	1.04507		83.8178	0.0766638	2.07666		90.6697	0.042538	3.04254		79.4631	0.0998344	4.09983		66.9232	0.174424	5.17442		80.0455	0.0966633	5.09666
2341.2	71.7797	0.143999	0.143999		89.8132	0.0466597	1.04666		83.496	0.0783343	2.07833		90.5129	0.0432895	3.04329		79.2241	0.101143	4.10114		67.0165	0.173818	5.17382		79.6859	0.0986188	5.09862
2343.12	71.6106	0.145022	0.145022		89.5971	0.047706	1.04771		83.2049	0.0798509	2.07985		90.4362	0.0436579	3.04366		78.9882	0.102438	4.10244		67.1514	0.172945	5.17295		79.5536	0.0993399	5.09934
2345.05	71.4589	0.145944	0.145944		89.5527	0.0479212	1.04792		82.93	0.0812881	2.08129		90.2447	0.0445784	3.04458		78.7692	0.103643	4.10364		67.3363	0.17175	5.17175		79.6171	0.0989938	5.09899
2346.98	71.2232	0.147379	0.147379		89.6838	0.0472858	1.04729		82.7205	0.0823867	2.08239		89.9307	0.0460922	3.04609		78.7974	0.103488	4.10349		67.5824	0.170166	5.17017		79.6218	0.0989682	5.09897
2348.91	71.1151	0.148038	0.148038		89.8023	0.0467125	1.04671		82.6981	0.0825045	2.0825		89.6021	0.0476818	3.04768		78.933	0.102741	4.10274		67.529	0.17051	5.17051		79.6732	0.0986876	5.09869
2350.84	71.154	0.1478	0.1478		89.8239	0.0466079	1.04661		82.8367	0.0817774	2.08178		89.4292	0.0485207	3.04852		79.0183	0.102272	4.10227		67.1668	0.172845	5.17285		79.8692	0.0976209	5.09762
2352.77	71.313	0.146831	0.146831		89.9269	0.0461106	1.04611		83.0297	0.0807666	2.08077		89.3878	0.0487218	3.04872		79.1117	0.101759	4.10176		66.7831	0.175334	5.17533		80.1605	0.0960396	5.09604
2354.7	71.5918	0.145136	0.145136		90.2078	0.0447561	1.04476		83.276	0.0794799	2.07948		89.3999	0.048663	3.04866		79.2785	0.100845	4.10084		66.418	0.177714	5.17771		80.4972	0.094219	5.09422
2356.62	71.9464	0.142991	0.142991		90.4819	0.0434382	1.04344		83.561	0.0779962	2.078		89.4427	0.0484552	3.04846		79.5036	0.0996133	4.09961		66.2317	0.178934	5.17893		80.8732	0.0921951	5.0922
2358.55	72.3588	0.140509	0.140509		90.6417	0.0426719	1.04267		84.0983	0.075213	2.07521		89.5083	0.0481369	3.04814		79.6418	0.0988589	4.09886		66.1611	0.179397	5.1794		81.2128	0.0903756	5.09038
2360.48	72.7281	0.138298	0.138298		90.7761	0.0420284	1.04203		84.5284	0.0729974	2.073		89.5138	0.0481102	3.04811		79.6715	0.0986971	4.0987		66.1396	0.179539	5.17954		81.3897	0.0894304	5.08943
2362.41	72.876	0.137415	0.137415		90.8973	0.0414489	1.04145		84.6138	0.072559	2.07256		89.5327	0.0480183	3.04802		79.6389	0.0988745	4.09887		66.3036	0.178463	5.17846		81.2907	0.0899591	5.08996
2364.34	72.6926	0.13851	0.13851		90.925	0.0413168	1.04132		84.484	0.0732257	2.07323		89.691	0.0472511	3.04725		79.5185	0.0995319	4.09953		66.5814	0.176647	5.17665		81.0042	0.0914926	5.09149
2366.27	72.2299	0.141283	0.141283		90.8547	0.0416527	1.04165		84.2666	0.0743447	2.07434		89.9648	0.0459274	3.04593		79.3396	0.10051	4.10051		66.8812	0.174696	5.1747		80.5732	0.0938092	5.09381
2368.2	71.7762	0.144019	0.144019		90.7846	0.0419876	1.04199		83.9773	0.0758381	2.07584		90.1719	0.0449288	3.04493		79.1228	0.101698	4.1017		67.1424	0.173003	5.173		80.0976	0.0963803	5.09638
2370.12	71.4063	0.146263	0.146263		90.7681	0.042067	1.04207		83.6305	0.0776353	2.07764		90.3032	0.044297	3.0443		78.8809	0.103028	4.10303		67.4504	0.171016	5.17102		79.6182	0.0989876	5.09899
2372.05	70.9722	0.148912	0.148912		90.7569	0.0421204	1.04212		83.3274	0.079212	2.07921		90.3578	0.0440342	3.04403		78.7395	0.103808	4.10381		67.8307	0.168574	5.16857		79.0497	0.1021	5.1021
2373.98	70.5007	0.151807	0.151807		90.6567	0.0425999	1.0426		83.0367	0.0807299	2.08073		90.2914	0.0443536	3.04435		78.7489	0.103755	4.10376		68.2731	0.16575	5.16575		78.4099	0.105629	5.10563
2375.91	70.0899	0.154344	0.154344		90.4057	0.0438043	1.0438		82.6976	0.0825069	2.08251		90.3073	0.044277	3.04428		78.6854	0.104106	4.10411		68.5492	0.163997	5.164		77.929	0.108301	5.1083
2377.84	69.7764	0.156291	0.156291		90.1445	0.0450607	1.04506		82.3618	0.0842744	2.08427		90.516	0.0432748	3.04327		78.5653	0.104769	4.10477		68.7663	0.162624	5.16262		77.6047	0.110112	5.11011
2379.77	69.501	0.158009	0.158009		89.9912	0.0457999	1.0458		82.1022	0.0856454	2.08565		90.7446	0.0421792	3.04218		78.4439	0.105441	4.10544		69.0948	0.160554	5.16055		77.3188	0.111715	5.11171
2381.7	69.2404	0.159641	0.159641		89.8774	0.0463496	1.04635		81.9074	0.0866769	2.08668		90.8441	0.0417034	3.0417		78.3761	0.105816	4.10582		69.4539	0.158303	5.1583		77.0737	0.113094	5.11309
2383.62	69.0622	0.16076	0.16076		89.7505	0.046963	1.04696		81.7842	0.0873305	2.08733		90.8644	0.0416065	3.04161		78.3651	0.105877	4.10588		69.8642	0.155746	5.15575		76.9042	0.11405	5.11405
2385.55	69.0129	0.16107	0.16107		89.6524	0.0474379	1.04744		81.7389	0.0875713	2.08757		90.9266	0.0413092	3.04131		78.3447	0.10599	4.10599		70.1275	0.154111	5.15411		76.749	0.114927	5.11493
2387.48	69.0003	0.161149	0.161149		89.611	0.0476388	1.04764		81.5339	0.088662	2.08866		90.9606	0.0411465	3.04115		78.3539	0.105939	4.10594		70.3137	0.15296	5.15296		76.6268	0.115619	5.11562
2389.41	68.9381	0.161541	0.161541		89.6411	0.0474929	1.04749		81.2936	0.0899435	2.08994		90.9493	0.0412005	3.0412		78.3933	0.105721	4.10572		70.468	0.152008	5.15201		76.5564	0.116018	5.11602
2391.34	68.8787	0.161915	0.161915		89.6562	0.0474197	1.04742		81.1802	0.0905497	2.09055		90.9092	0.0413924	3.04139		78.3662	0.105871	4.10587		70.4721	0.151983	5.15198		76.5074	0.116296	5.1163
2393.27	68.8676	0.161985	0.161985		89.6795	0.0473067	1.04731		81.2318	0.0902741	2.09027		90.8153	0.0418412	3.04184		78.3217	0.106118	4.10612		70.4192	0.152309	5.15231		76.4433	0.116661	5.11666
2395.2	68.9243	0.161628	0.161628		89.7071	0.0471731	1.04717		81.2407	0.0902261	2.09023		90.7454	0.0421755	3.04218		78.3018	0.106228	4.10623		70.3582	0.152685	5.15268		76.4006	0.116903	5.1169
2397.12	69.0057	0.161115	0.161115		89.6891	0.0472602	1.04726		81.1603	0.0906561	2.09066		90.6537	0.0426143	3.04261		78.3503	0.105959	4.10596		70.2513	0.153346	5.15335		76.3578	0.117146	5.11715
2399.05	69.0777	0.160662	0.160662		89.5774	0.0478013	1.0478		81.1273	0.0908328	2.09083		90.5082	0.0433123	3.04331		78.4103	0.105627	4.10563		70.1143	0.154193	5.15419		76.2847	0.117563	5.11756
2400.98	69.1118	0.160448	0.160448		89.4311	0.0485114	1.04851		81.078	0.0910968	2.0911		90.3361	0.0441389	3.04414		78.4887	0.105193	4.10519		69.9466	0.155233	5.15523		76.1826	0.118144	5.11814
2402.91	69.1096	0.160462	0.160462		89.338	0.0489638	1.04896		81.0885	0.0910406	2.09104		90.2378	0.0446117	3.04461		78.5317	0.104955	4.10496		69.8146	0.156054	5.15605		76.0682	0.118797	5.1188
2404.84	69.1148	0.160429	0.160429		89.3081	0.0491092	1.04911		81.1741	0.0905826	2.09058		90.2026	0.0447811	3.04478		78.5261	0.104986	4.10499		69.7321	0.156567	5.15657		75.9432	0.119511	5.11951
2406.77	69.1524	0.160192	0.160192		89.2726	0.0492816	1.04928		81.2725	0.0900564	2.09006		90.1956	0.0448145	3.04481		78.4989	0.105136	4.10514		69.6913	0.156821	5.15682		75.8147	0.120246	5.12025
2408.7	69.185	0.159988	0.159988		89.2358	0.049461	1.04946		81.3397	0.0896975	2.0897		90.2263	0.044667	3.04467		78.4516	0.105398	4.1054		69.6487	0.157087	5.15709		75.6765	0.121039	5.12104
2410.62	69.1953	0.159923	0.159923		89.2519	0.0493823	1.04938		81.3167	0.0898202	2.08982		90.3329	0.044154	3.04415		78.4338	0.105497	4.1055		69.6607	0.157012	5.15701		75.5375	0.121837	5.12184
2412.55	69.1899	0.159957	0.159957		89.2909	0.0491926	1.04919		81.2263	0.0903032	2.0903		90.4685	0.0435025	3.0435		78.3685	0.105859	4.10586		69.7403	0.156516	5.15652		75.4236	0.122493	5.12249
2414.48	69.1704	0.16008	0.16008		89.319	0.0490561	1.04906		81.1295	0.0908209	2.09082		90.4999	0.0433519	3.04335		78.2061	0.106759	4.10676		69.8234	0.155999	5.156		75.3355	0.123001	5.123
2416.41	69.1088	0.160466	0.160466		89.3037	0.0491308	1.04913		81.049	0.0912522	2.09125		90.4527	0.0435785	3.04358		78.0291	0.107744	4.10774		69.8194	0.156024	5.15602		75.2217	0.123657	5.12366
2418.34	69.0179	0.161038	0.161038		89.2438	0.0494221	1.04942		80.9839	0.0916013	2.0916		90.4366	0.0436558	3.04366		77.8587	0.108693	4.10869		69.7328	0.156563	5.15656		75.1192	0.124249	5.12425
2420.26	68.9193	0.161659	0.161659		89.2332	0.0494736	1.04947		80.8607	0.0922626	2.09226		90.4313	0.043681	3.04368		77.7157	0.109491	4.10949		69.6341	0.157178	5.15718		75.0614	0.124583	5.12458
2422.19	68.8255	0.162251	0.162251		89.2221	0.0495277	1.04953		80.7087	0.0930796	2.09308		90.3862	0.043898	3.0439		77.6133	0.110064	4.11006		69.4836	0.158118	5.15812		75.042	0.124696	5.1247
2424.12	68.7259	0.162879	0.162879		89.1515	0.0498713	1.04987		80.611	0.093606	2.09361		90.2265	0.0446661	3.04467		77.5805	0.110247	4.11025		69.3564	0.158914	5.15891		75.0221	0.124811	5.12481
2426.05	68.5893	0.163744	0.163744		89.0508	0.050362	1.05036		80.5456	0.0939584	2.09396		89.9831	0.0458391	3.04584		77.5403	0.110472	4.11047		69.2385	0.159652	5.15965		74.9932	0.124978	5.12498
2427.98	68.4498	0.164628	0.164628		89.0152	0.050536	1.05054		80.5164	0.0941155	2.09412		89.749	0.0469704	3.04697		77.565	0.110334	4.11033		69.0917	0.160574	5.16057		74.9415	0.125278	5.12528
2429.91	68.3805	0.165067	0.165067		88.9986	0.0506167	1.05062		80.5457	0.0939577	2.09396		89.5537	0.0479165	3.04792		77.6016	0.110129	4.11013		68.8712	0.161962	5.16196		74.8766	0.125654	5.12565
2431.84	68.3197	0.165454	0.165454		89.0016	0.0506022	1.0506		80.5731	0.0938098	2.09381		89.4334	0.0485005	3.0485		77.5967	0.110157	4.11016		68.6155	0.163578	5.16358		74.7734	0.126253	5.12625
2433.76	68.2791	0.165712	0.165712		88.981	0.050703	1.0507		80.6229	0.0935416	2.09354		89.3465	0.0489227	3.04892		77.5895	0.110197	4.1102		68.4184	0.164827	5.16483		74.6598	0.126913	5.12691
2435.69	68.3168	0.165473	0.165473		88.9203	0.0509991	1.051		80.6847	0.0932086	2.09321		89.3054	0.0491221	3.04912		77.6159	0.110049	4.11005		68.389	0.165013	5.16501		74.5304	0.127666	5.12767
2437.62	68.3853	0.165037	0.165037		88.8633	0.0512775	1.05128		80.7246	0.0929939	2.09299		89.3416	0.0489463	3.04895		77.662	0.109792	4.10979		68.4551	0.164594	5.16459		74.4056	0.128394	5.12839
2439.55	68.4499	0.164627	0.164627		88.8194	0.0514923	1.05149		80.7441	0.092889	2.09289		89.3239	0.0490321	3.04903		77.6309	0.109966	4.10997		68.4959	0.164336	5.16434		74.3003	0.129009	5.12901
2441.48	68.4972	0.164327	0.164327		88.7539	0.0518124	1.05181		80.7285	0.0929732	2.09297		89.1917	0.0496756	3.04968		77.549	0.110424	4.11042		68.4492	0.164632	5.16463		74.195	0.129625	5.12963
2443.41	68.4777	0.164451	0.164451		88.6277	0.0524304	1.05243		80.6373	0.0934638	2.09346		89.0546	0.0503437	3.05034		77.5045	0.110673	4.11067		68.4193	0.164821	5.16482		74.068	0.130369	5.13037
2445.34	68.4856	0.164401	0.164401		88.5336	0.0528918	1.05289		80.5545	0.09391	2.09391		88.9759	0.0507276	3.05073		77.447	0.110995	4.111		68.4515	0.164617	5.16462		73.964	0.13098	5.13098
2447.26	68.511	0.16424	0.16424		88.5088	0.0530137	1.05301		80.4449	0.0945016	2.0945		88.8978	0.0511089	3.05111		77.3517	0.11153	4.11153		68.4678	0.164514	5.16451		73.8616	0.131581	5.13158
2449.19	68.5036	0.164287	0.164287		88.488	0.0531156	1.05312		80.3666	0.0949244	2.09492		88.8087	0.0515446	3.05154		77.2727	0.111974	4.11197		68.471	0.164493	5.16449		73.7826	0.132046	5.13205
2451.12	68.5351	0.164087	0.164087		88.4949	0.0530816	1.05308		80.3081	0.0952405	2.09524		88.7359	0.0519005	3.0519		77.2463	0.112122	4.11212		68.5281	0.164131	5.16413		73.7385	0.132306	5.13231
2453.05	68.6058	0.163639	0.163639		88.5362	0.0528791	1.05288		80.1354	0.0961756	2.09618		88.6873	0.0521383	3.05214		77.2816	0.111924	4.11192		68.5605	0.163926	5.16393		73.6791	0.132656	5.13266
2454.98	68.7211	0.16291	0.16291		88.6039	0.0525473	1.05255		79.9647	0.0971016	2.0971		88.728	0.0519395	3.05194		77.3304	0.11165	4.11165		68.5727	0.163849	5.16385		73.5901	0.133181	5.13318
2456.91	68.8204	0.162283	0.162283		88.6633	0.0522559	1.05226		79.9181	0.0973546	2.09735		88.754	0.051812	3.05181		77.3385	0.111604	4.1116		68.5358	0.164082	5.16408		73.501	0.133707	5.13371
2458.84	68.772	0.162589	0.162589		88.7597	0.051784	1.05178		79.9964	0.0969297	2.09693		88.8303	0.051439	3.05144		77.3397	0.111597	4.1116		68.5294	0.164123	5.16412		73.4115	0.134236	5.13424
2460.76	68.5969	0.163695	0.163695		88.8144	0.0515166	1.05152		80.1699	0.0959885	2.09599		88.9248	0.0509772	3.05098		77.3449	0.111568	4.11157		68.5656	0.163894	5.16389		73.3524	0.134586	5.13459
2462.69	68.4665	0.164522	0.164522		88.793	0.0516214	1.05162		80.338	0.0950793	2.09508		89.0604	0.0503156	3.05032		77.3989	0.111265	4.11127		68.7158	0.162944	5.16294		73.2741	0.13505	5.13505
2464.62	68.3242	0.165426	0.165426		88.8002	0.051586	1.05159		80.4954	0.0942291	2.09423		89.1976	0.0496471	3.04965		77.4612	0.110916	4.11092		68.8833	0.161886	5.16189		73.1917	0.135538	5.13554
2466.55	68.1593	0.166475	0.166475		88.8639	0.0512746	1.05127		80.621	0.093552	2.09355		89.3088	0.0491058	3.04911		77.465	0.110894	4.11089		68.962	0.16139	5.16139		73.13	0.135904	5.1359
2468.48	68.0425	0.16722	0.16722		88.8824	0.0511841	1.05118		80.7171	0.0930347	2.09303		89.3888	0.0487171	3.04872		77.4722	0.110854	4.11085		69.008	0.1611	5.1611		73.074	0.136237	5.13624
2470.41	67.9643	0.167719	0.167719		88.8454	0.0513649	1.05136		80.7458	0.0928803	2.09288		89.4394	0.0484711	3.04847		77.507	0.110659	4.11066		69.1041	0.160496	5.1605		73.0089	0.136624	5.13662
2472.34	67.954	0.167785	0.167785		88.8149	0.051514	1.05151		80.7087	0.0930794	2.09308		89.4408	0.0484641	3.04846		77.5167	0.110605	4.1106		69.1579	0.160158	5.16016		72.9408	0.137029	5.13703
2474.26	67.928	0.167951	0.167951		88.7887	0.0516423	1.05164		80.5705	0.0938241	2.09382		89.4133	0.048598	3.0486		77.5115	0.110634	4.11063		69.1151	0.160427	5.16043		72.8806	0.137388	5.13739
2476.19	67.9563	0.16777	0.16777		88.7604	0.0517807	1.05178		80.4352	0.0945541	2.09455		89.4183	0.0485737	3.04857		77.5236	0.110566	4.11057		69.0392	0.160905	5.1609		72.8551	0.13754	5.13754
2478.12	68.1518	0.166523	0.166523		88.7623	0.0517713	1.05177		80.3556	0.094984	2.09498		89.4663	0.0483403	3.04834		77.5418	0.110464	4.11046		68.989	0.16122	5.16122		72.8321	0.137677	5.13768
2480.05	68.4092	0.164886	0.164886		88.703	0.0520618	1.05206		80.1856	0.0959035	2.0959		89.5345	0.0480094	3.04801		77.5236	0.110566	4.11057		68.9567	0.161424	5.16142		72.7913	0.137921	5.13792
2481.98	68.6421	0.163409	0.163409		88.6231	0.0524532	1.05245		79.9865	0.0969835	2.09698		89.5507	0.0479313	3.04793		77.4492	0.110983	4.11098		68.9534	0.161444	5.16144		72.7559	0.138132	5.13813
2483.91	68.7837	0.162514	0.162514		88.6174	0.0524811	1.05248		79.915	0.0973717	2.09737		89.464	0.0483515	3.04835		77.4143	0.111179	4.11118		68.9458	0.161492	5.16149		72.7386	0.138235	5.13823
2485.83	68.7961	0.162436	0.162436		88.6188	0.0524739	1.05247		79.883	0.0975455	2.09755		89.3665	0.0488255	3.04883		77.4106	0.1112	4.1112		68.9394	0.161532	5.16153		72.723	0.138328	5.13833
2487.76	68.6704	0.163231	0.163231		88.6167	0.0524847	1.05248		79.8072	0.0979577	2.09796		89.2516	0.0493837	3.04938		77.3584	0.111492	4.11149		68.8831	0.161887	5.16189		72.7124	0.138392	5.13839
2489.69	68.5695	0.163869	0.163869		88.6154	0.0524906	1.05249		79.7408	0.0983197	2.09832		89.1646	0.0498073	3.04981		77.344	0.111573	4.11157		68.8387	0.162167	5.16217		72.6938	0.138503	5.1385
2491.62	68.5296	0.164122	0.164122		88.6474	0.0523342	1.05233		79.8087	0.0979497	2.09795		89.0306	0.0504607	3.05046		77.3499	0.11154	4.11154		68.8756	0.161935	5.16193		72.6548	0.138736	5.13874
2493.55	68.4905	0.16437	0.16437		88.6902	0.0521246	1.05212		79.9691	0.0970777	2.09708		88.8843	0.051175	3.05117		77.3561	0.111505	4.11151		68.9312	0.161584	5.16158		72.5555	0.13933	5.13933
2495.48	68.4378	0.164704	0.164704		88.6842	0.0521537	1.05215		80.137	0.0961669	2.09617		88.724	0.0519591	3.05196		77.3696	0.11143	4.11143		69.0027	0.161134	5.16113		72.4575	0.139917	5.13992
2497.41	68.3357	0.165352	0.165352		88.6172	0.0524818	1.05248		80.1898	0.0958808	2.09588		88.572	0.0527038	3.0527		77.3724	0.111414	4.11141		69.1039	0.160498	5.1605		72.3675	0.140456	5.14046
2499.33	68.2387	0.165969	0.165969		88.5536	0.0527937	1.05279		80.1261	0.0962257	2.09623		88.3963	0.0535657	3.05357		77.3729	0.111411	4.11141		69.1997	0.159896	5.1599		72.2635	0.141081	5.14108
2501.26	68.1235	0.166703	0.166703		88.5175	0.0529709	1.05297		80.0276	0.0967601	2.09676		88.2787	0.0541443	3.05414		77.4024	0.111245	4.11125		69.2496	0.159583	5.15958		72.1516	0.141754	5.14175
2503.19	68.0168	0.167384	0.167384		88.4969	0.0530717	1.05307		79.9615	0.097119	2.09712		88.2753	0.0541609	3.05416		77.4108	0.111199	4.1112		69.208	0.159844	5.15984		72.0141	0.142583	5.14258
2505.12	68.02	0.167364	0.167364		88.5072	0.0530215	1.05302		79.9253	0.0973156	2.09732		88.3345	0.0538698	3.05387		77.374	0.111405	4.11141		69.052	0.160824	5.16082		71.8644	0.143486	5.14349
2507.05	68.0629	0.167089	0.167089		88.4894	0.0531086	1.05311		79.7848	0.0980799	2.09808		88.4411	0.0533458	3.05335		77.2988	0.111827	4.11183		68.8983	0.161791	5.16179		71.7341	0.144274	5.14427
2508.98	68.051	0.167166	0.167166		88.4668	0.0532198	1.05322		79.6531	0.0987971	2.0988		88.5266	0.0529264	3.05293		77.1789	0.112501	4.1125		68.7834	0.162517	5.16252		71.6139	0.145002	5.145
2510.91	68.0151	0.167395	0.167395		88.5107	0.0530042	1.053		79.6224	0.0989646	2.09896		88.59	0.0526154	3.05262		77.0358	0.113307	4.11331		68.6598	0.163297	5.1633		71.5131	0.145615	5.14561
2512.83	68.0233	0.167343	0.167343		88.5381	0.0528699	1.05287		79.514	0.0995564	2.09956		88.6905	0.0521227	3.05212		76.9113	0.11401	4.11401		68.5526	0.163976	5.16398		71.4376	0.146073	5.14607
2514.76	68.0216	0.167353	0.167353		88.5318	0.0529007	1.0529		79.3481	0.100464	2.10046		88.8295	0.0514429	3.05144		76.7963	0.11466	4.11466		68.45	0.164627	5.16463		71.3722	0.146471	5.14647
2516.69	68.0538	0.167147	0.167147		88.5513	0.0528049	1.0528		79.246	0.101022	2.10102		89.0047	0.0505871	3.05059		76.7321	0.115023	4.11502		68.3372	0.165343	5.16534		71.3064	0.146871	5.14687
2518.62	68.1726	0.16639	0.16639		88.5628	0.0527488	1.05275		79.1793	0.101388	2.10139		89.1457	0.0498997	3.0499		76.68	0.115318	4.11532		68.2767	0.165727	5.16573		71.2289	0.147344	5.14734
2520.55	68.2185	0.166098	0.166098		88.5395	0.0528631	1.05286		79.144	0.101582	2.10158		89.2012	0.0496292	3.04963		76.602	0.11576	4.11576		68.2633	0.165813	5.16581		71.1684	0.147713	5.14771
2522.48	68.1817	0.166332	0.166332		88.5207	0.052955	1.05296		79.0805	0.10193	2.10193		89.148	0.0498885	3.04989		76.5036	0.116318	4.11632		68.2601	0.165833	5.16583		71.1737	0.14768	5.14768
2524.4	68.1153	0.166755	0.166755		88.4435	0.0533341	1.05333		78.9596	0.102595	2.10259		89.0355	0.0504367	3.05044		76.3691	0.117083	4.11708		68.3139	0.165491	5.16549		71.1659	0.147728	5.14773
2526.33	68.0738	0.16702	0.16702		88.3725	0.0536827	1.05368		78.903	0.102906	2.10291		88.8119	0.0515287	3.05153		76.3031	0.117458	4.11746		68.1993	0.16622	5.16622		71.1082	0.14808	5.14808
2528.26	68.0142	0.1674	0.1674		88.3465	0.0538108	1.05381		78.8787	0.10304	2.10304		88.5378	0.0528712	3.05287		76.3343	0.11728	4.11728		67.967	0.167702	5.1677		71.0277	0.148572	5.14857
2530.19	67.946	0.167836	0.167836		88.3252	0.0539153	1.05392		78.7744	0.103615	2.10361		88.2871	0.0541027	3.0541		76.3639	0.117112	4.11711		67.7494	0.169094	5.16909		70.9318	0.149159	5.14916
2532.12	67.9479	0.167824	0.167824		88.2476	0.0542969	1.0543		78.7044	0.104001	2.104		88.0982	0.055033	3.05503		76.401	0.116901	4.1169		67.5487	0.170383	5.17038		70.8435	0.1497	5.1497
2534.05	67.9282	0.16795	0.16795		88.1068	0.0549906	1.05499		78.675	0.104163	2.10416		87.9344	0.0558413	3.05584		76.4137	0.116829	4.11683		67.4713	0.170881	5.17088		70.7424	0.15032	5.15032
2535.97	67.8582	0.168398	0.168398		87.9591	0.0557192	1.05572		78.6676	0.104204	2.1042		87.7666	0.0566705	3.05667		76.3592	0.117138	4.11714		67.4419	0.17107	5.17107		70.6179	0.151085	5.15109
2537.9	67.8503	0.168448	0.168448		87.8374	0.0563206	1.05632		78.6948	0.104054	2.10405		87.6571	0.0572131	3.05721		76.324	0.117339	4.11734		67.4295	0.17115	5.17115		70.4995	0.151814	5.15181
2539.83	67.9076	0.168082	0.168082		87.7091	0.0569552	1.05696		78.6606	0.104243	2.10424		87.6007	0.0574927	3.05749		76.3075	0.117433	4.11743		67.4662	0.170913	5.17091		70.404	0.152402	5.1524
2541.76	67.9332	0.167918	0.167918		87.5608	0.0576905	1.05769		78.5934	0.104614	2.10461		87.5319	0.0578335	3.05783		76.2613	0.117696	4.1177		67.5405	0.170436	5.17044		70.3034	0.153024	5.15302
2543.69	67.9331	0.167919	0.167919		87.4505	0.0582379	1.05824		78.4783	0.105251	2.10525		87.4847	0.058068	3.05807		76.224	0.117908	4.11791		67.5899	0.170118	5.17012		70.1818	0.153776	5.15378
2545.62	67.9146	0.168037	0.168037		87.3534	0.0587199	1.05872		78.2708	0.1064	2.1064		87.4424	0.058278	3.05828		76.1708	0.118211	4.11821		67.5837	0.170158	5.17016		70.0749	0.154438	5.15444
2547.55	67.843	0.168495	0.168495		87.265	0.0591601	1.05916		78.0326	0.107724	2.10772		87.423	0.0583741	3.05837		76.0949	0.118645	4.11864		67.561	0.170304	5.1703		70.0186	0.154786	5.15479
2549.47	67.7412	0.169147	0.169147		87.1972	0.0594973	1.0595		77.8318	0.108843	2.10884		87.4021	0.058478	3.05848		76.0207	0.119068	4.11907		67.4874	0.170778	5.17078		69.9961	0.154926	5.15493
2551.4	67.5843	0.170154	0.170154		87.0998	0.0599827	1.05998		77.6945	0.10961	2.10961		87.2866	0.0590524	3.05905		75.9066	0.11972	4.11972		67.3407	0.171722	5.17172		69.9699	0.155089	5.15509
2553.33	67.4375	0.171099	0.171099		87.0388	0.0602873	1.06029		77.584	0.110228	2.11023		87.0874	0.0600447	3.06004		75.8185	0.120225	4.12022		67.0613	0.173528	5.17353		69.9505	0.155209	5.15521
2555.26	67.3527	0.171645	0.171645		87.0092	0.0604349	1.06043		77.4714	0.110859	2.11086		86.9476	0.0607422	3.06074		75.7539	0.120595	4.1206		66.8115	0.175149	5.17515		69.9303	0.155334	5.15533
2557.19	67.2709	0.172173	0.172173		86.9462	0.0607492	1.06075		77.3166	0.111727	2.11173		86.8636	0.0611622	3.06116		75.6635	0.121114	4.12111		66.6721	0.176056	5.17606		69.9136	0.155438	5.15544
2559.12	67.1812	0.172753	0.172753		86.8652	0.0611542	1.06115		77.1638	0.112586	2.11259		86.7624	0.0616684	3.06167		75.5517	0.121756	4.12176		66.6408	0.17626	5.17626		69.8873	0.155602	5.1556
2561.05	67.0845	0.173378	0.173378		86.8164	0.0613984	1.0614		77.0481	0.113238	2.11324		86.6218	0.0623726	3.06237		75.4371	0.122415	4.12242		66.6143	0.176432	5.17643		69.8221	0.156007	5.15601
2562.97	66.9776	0.17407	0.17407		86.7581	0.0616901	1.06169		76.9321	0.113892	2.11389		86.4962	0.0630028	3.063		75.3163	0.123111	4.12311		66.5284	0.176993	5.17699		69.7446	0.156489	5.15649
2564.9	66.9057	0.174537	0.174537		86.6603	0.0621798	1.06218		76.8724	0.11423	2.11423		86.3597	0.0636887	3.06369		75.1701	0.123955	4.12395		66.5016	0.177168	5.17717		69.6676	0.156969	5.15697
2566.83	66.8128	0.17514	0.17514		86.5464	0.0627509	1.06275		76.8707	0.114239	2.11424		86.1233	0.0648795	3.06488		74.9641	0.125147	4.12515		66.5528	0.176833	5.17683		69.591	0.157447	5.15745
2568.76	66.687	0.175959	0.175959		86.3782	0.0635958	1.0636		76.8674	0.114258	2.11426		85.8359	0.0663308	3.06633		74.7974	0.126113	4.12611		66.539	0.176924	5.17692		69.5039	0.157991	5.15799
2570.69	66.5792	0.176661	0.176661		86.1538	0.0647255	1.06473		76.8313	0.114462	2.11446		85.6103	0.0674738	3.06747		74.6939	0.126715	4.12671		66.4213	0.177693	5.17769		69.3831	0.158746	5.15875
2572.62	66.4391	0.177576	0.177576		85.9351	0.0658296	1.06583		76.7512	0.114915	2.11491		85.4405	0.0683363	3.06834		74.5659	0.12746	4.12746		66.2866	0.178574	5.17857		69.237	0.159662	5.15966
2574.55	66.2739	0.178657	0.178657		85.7344	0.0668449	1.06684		76.555	0.116026	2.11603		85.3045	0.0690279	3.06903		74.4439	0.128171	4.12817		66.1168	0.179688	5.17969		69.0917	0.160574	5.16057
2576.47	66.1218	0.179655	0.179655		85.5412	0.0678249	1.06782		76.2965	0.117495	2.1175		85.1596	0.0697663	3.06977		74.3214	0.128886	4.12889		65.8653	0.181343	5.18134		68.9839	0.161252	5.16125
2578.4	65.9899	0.180522	0.180522		85.3804	0.0686416	1.06864		76.0614	0.118836	2.11884		85.0311	0.0704219	3.07042		74.2052	0.129566	4.12957		65.679	0.182574	5.18257		68.8907	0.161839	5.16184
2580.33	65.9288	0.180925	0.180925		85.3039	0.0690312	1.06903		75.8728	0.119914	2.11991		84.9457	0.0708585	3.07086		74.1435	0.129927	4.12993		65.5546	0.183397	5.1834		68.8028	0.162394	5.16239
2582.26	65.9476	0.180801	0.180801		85.3039	0.069031	1.06903		75.7427	0.120659	2.12066		84.9641	0.0707644	3.07076		74.1302	0.130005	4.13		65.4202	0.184288	5.18429		68.7058	0.163007	5.16301
2584.19	65.96	0.18072	0.18072		85.3336	0.0688798	1.06888		75.6713	0.121069	2.12107		84.9926	0.0706186	3.07062		74.0934	0.13022	4.13022		65.3532	0.184733	5.18473		68.6246	0.16352	5.16352
2586.12	65.9364	0.180875	0.180875		85.385	0.0686186	1.06862		75.6256	0.121331	2.12133		85.0511	0.0703201	3.07032		74.0455	0.130501	4.1305		65.3746	0.184591	5.18459		68.5453	0.164022	5.16402
2588.05	65.9413	0.180842	0.180842		85.4566	0.0682542	1.06825		75.6935	0.120941	2.12094		85.1899	0.0696118	3.06961		74.0329	0.130575	4.13058		65.3583	0.184699	5.1847		68.4579	0.164576	5.16458
2589.97	65.9705	0.18065	0.18065		85.5174	0.0679456	1.06795		75.8383	0.120111	2.12011		85.3579	0.0687563	3.06876		74.0329	0.130575	4.13058		65.3395	0.184824	5.18482		68.3711	0.165127	5.16513
2591.9	66.0068	0.180412	0.180412		85.541	0.0678257	1.06783		76.0279	0.119027	2.11903		85.495	0.0680593	3.06806		74.0293	0.130596	4.1306		65.3613	0.184679	5.18468		68.2845	0.165678	5.16568
2593.83	65.9862	0.180547	0.180547		85.5497	0.0677814	1.06778		76.2516	0.117751	2.11775		85.6159	0.0674457	3.06745		74.0183	0.130661	4.13066		65.3413	0.184812	5.18481		68.1953	0.166245	5.16625
2595.76	65.9582	0.180731	0.180731		85.5234	0.0679151	1.06792		76.4224	0.116779	2.11678		85.6903	0.0670686	3.06707		74.0452	0.130503	4.1305		65.2013	0.185744	5.18574		68.1165	0.166747	5.16675
2597.69	65.947	0.180805	0.180805		85.4799	0.0681361	1.06814		76.5564	0.116018	2.11602		85.6708	0.067167	3.06717		74.0805	0.130296	4.1303		65.0132	0.186998	5.187		68.0122	0.167413	5.16741
2599.62	65.9109	0.181042	0.181042		85.4456	0.0683103	1.06831		76.581	0.115879	2.11588		85.5584	0.0677374	3.06774		74.0499	0.130476	4.13048		64.8797	0.187891	5.18789		67.8734	0.1683	5.1683
2601.54	65.8568	0.181399	0.181399		85.3993	0.0685455	1.06855		76.4408	0.116675	2.11667		85.3996	0.0685441	3.06854		73.9876	0.130841	4.13084		64.7242	0.188933	5.18893		67.7501	0.16909	5.16909
2603.47	65.8155	0.181672	0.181672		85.3497	0.0687982	1.0688		76.2333	0.117855	2.11786		85.218	0.0694686	3.06947		73.8699	0.131533	4.13153		64.5742	0.189941	5.18994		67.6548	0.169701	5.1697
2605.4	65.7448	0.182139	0.182139		85.2924	0.0690897	1.06909		76.0189	0.119079	2.11908		85.0257	0.0704497	3.07045		73.7283	0.132366	4.13237		64.4869	0.190528	5.19053		67.5572	0.170328	5.17033
2607.33	65.6308	0.182892	0.182892		85.213	0.0694944	1.06949		75.8335	0.120139	2.12014		84.7851	0.0716807	3.07168		73.6034	0.133102	4.1331		64.418	0.190993	5.19099		67.4637	0.17093	5.17093
2609.26	65.4904	0.183823	0.183823		85.1066	0.0700369	1.07004		75.6268	0.121324	2.12132		84.5597	0.0728366	3.07284		73.5024	0.133698	4.1337		64.3572	0.191403	5.1914		67.3709	0.171528	5.17153
2611.19	65.3443	0.184792	0.184792		84.9514	0.0708294	1.07083		75.4724	0.122212	2.12221		84.3892	0.0737131	3.07371		73.3711	0.134475	4.13448		64.3546	0.19142	5.19142		67.2886	0.172058	5.17206
2613.11	65.2023	0.185737	0.185737		84.802	0.0715938	1.07159		75.3279	0.123044	2.12304		84.2602	0.0743776	3.07438		73.231	0.135305	4.13531		64.3417	0.191507	5.19151		67.2101	0.172566	5.17257
2615.04	65.0979	0.186433	0.186433		84.6986	0.0721239	1.07212		75.204	0.123759	2.12376		84.1633	0.0748773	3.07488		73.138	0.135857	4.13586		64.2981	0.191802	5.1918		67.1137	0.173189	5.17319
2616.97	65.0136	0.186996	0.186996		84.6142	0.0725566	1.07256		75.1105	0.124299	2.1243		84.1299	0.0750496	3.07505		73.0743	0.136235	4.13624		64.2509	0.192121	5.19212		66.9915	0.17398	5.17398
2618.9	64.9584	0.187365	0.187365		84.5208	0.0730361	1.07304		75.0203	0.124821	2.12482		84.1476	0.0749585	3.07496		73.049	0.136386	4.13639		64.1389	0.192878	5.19288		66.8615	0.174824	5.17482
2620.83	64.9284	0.187565	0.187565		84.467	0.0733129	1.07331		74.9608	0.125166	2.12517		84.1929	0.0747248	3.07472		73.0316	0.136489	4.13649		64.024	0.193657	5.19366		66.7093	0.175814	5.17581
2622.76	64.9063	0.187713	0.187713		84.4347	0.073479	1.07348		74.9688	0.12512	2.12512		84.2073	0.0746502	3.07465		73.0193	0.136562	4.13656		63.9483	0.194171	5.19417		66.5597	0.176789	5.17679
2624.69	64.9089	0.187696	0.187696		84.429	0.0735084	1.07351		75.0118	0.124871	2.12487		84.1956	0.0747107	3.07471		73.0378	0.136452	4.13645		63.8945	0.194536	5.19454		66.4057	0.177795	5.17779
2626.61	64.9183	0.187633	0.187633		84.4401	0.0734515	1.07345		74.9938	0.124974	2.12497		84.1825	0.0747782	3.07478		73.0526	0.136364	4.13636		63.8373	0.194926	5.19493		66.2583	0.17876	5.17876
2628.54	64.8892	0.187828	0.187828		84.4415	0.0734439	1.07344		74.9573	0.125186	2.12519		84.1778	0.0748026	3.0748		73.0443	0.136414	4.13641		63.7466	0.195543	5.19554		66.1276	0.179617	5.17962
2630.47	64.8194	0.188295	0.188295		84.4303	0.0735019	1.0735		74.9347	0.125317	2.12532		84.1395	0.0750001	3.075		72.9864	0.136758	4.13676		63.6544	0.196172	5.19617		65.9889	0.180529	5.18053
2632.4	64.7496	0.188763	0.188763		84.3804	0.0737586	1.07376		74.918	0.125414	2.12541		84.0931	0.0752399	3.07524		72.928	0.137105	4.13711		63.5976	0.196559	5.19656		65.8475	0.181461	5.18146
2634.33	64.6911	0.189155	0.189155		84.3066	0.0741384	1.07414		74.9336	0.125323	2.12532		84.0793	0.075311	3.07531		72.91	0.137213	4.13721		63.6017	0.196531	5.19653		65.7107	0.182364	5.18236
2636.26	64.6262	0.189591	0.189591		84.2449	0.0744564	1.07446		74.898	0.12553	2.12553		84.0731	0.0753428	3.07534		72.8845	0.137365	4.13736		63.6153	0.196438	5.19644		65.5725	0.183278	5.18328
2638.19	64.5843	0.189873	0.189873		84.1997	0.0746896	1.07469		74.8013	0.126091	2.12609		84.0528	0.075448	3.07545		72.8285	0.137699	4.1377		63.6472	0.196221	5.19622		65.4411	0.18415	5.18415
2640.11	64.5615	0.190026	0.190026		84.1668	0.0748592	1.07486		74.664	0.126889	2.12689		83.9693	0.0758797	3.07588		72.8026	0.137853	4.13785		63.6394	0.196274	5.19627		65.3015	0.185077	5.18508
2642.04	64.5433	0.190149	0.190149		84.1241	0.0750795	1.07508		74.5321	0.127657	2.12766		83.8429	0.0765337	3.07653		72.7862	0.137951	4.13795		63.5661	0.196775	5.19677		65.1469	0.186106	5.18611
2643.97	64.5087	0.190382	0.190382		84.0731	0.0753427	1.07534		74.4167	0.12833	2.12833		83.7474	0.0770288	3.07703		72.7381	0.138238	4.13824		63.4471	0.197588	5.19759		64.9969	0.187107	5.18711
2645.9	64.4636	0.190686	0.190686		84.0009	0.075716	1.07572		74.3285	0.128845	2.12884		83.6515	0.0775261	3.07753		72.6675	0.13866	4.13866		63.2885	0.198675	5.19867		64.867	0.187976	5.18798
2647.83	64.3962	0.19114	0.19114		83.9139	0.0761658	1.07617		74.2739	0.129164	2.12916		83.546	0.0780742	3.07807		72.5513	0.139355	4.13935		63.167	0.19951	5.19951		64.7408	0.188822	5.18882
2649.76	64.2868	0.191878	0.191878		83.8008	0.0767516	1.07675		74.1979	0.129608	2.12961		83.4199	0.0787305	3.07873		72.4163	0.140164	4.14016		63.0655	0.200208	5.20021		64.6225	0.189616	5.18962
2651.68	64.2007	0.19246	0.19246		83.703	0.0772588	1.07726		74.0823	0.130286	2.13029		83.2922	0.0793955	3.0794		72.3186	0.14075	4.14075		62.9854	0.20076	5.20076		64.5092	0.190378	5.19038
2653.61	64.1098	0.193075	0.193075		83.648	0.0775445	1.07754		73.9975	0.130783	2.13078		83.1805	0.0799785	3.07998		72.2562	0.141125	4.14113		62.9154	0.201243	5.20124		64.4217	0.190968	5.19097
2655.54	64.0454	0.193512	0.193512		83.6334	0.0776202	1.07762		74.0006	0.130765	2.13076		83.1183	0.0803034	3.0803		72.2267	0.141302	4.1413		62.8942	0.201389	5.20139		64.3586	0.191393	5.19139
2657.47	64.0442	0.19352	0.19352		83.6461	0.0775543	1.07755		74.0522	0.130462	2.13046		83.1596	0.0800875	3.08009		72.2313	0.141274	4.14127		62.9411	0.201066	5.20107		64.3078	0.191736	5.19174
2659.4	64.095	0.193176	0.193176		83.6697	0.0774315	1.07743		74.1488	0.129896	2.1299		83.2904	0.079405	3.07941		72.2781	0.140993	4.14099		63.0346	0.200421	5.20042		64.2691	0.191998	5.192
2661.33	64.1747	0.192636	0.192636		83.725	0.0771448	1.07714		74.2775	0.129143	2.12914		83.4455	0.0785968	3.0786		72.3453	0.14059	4.14059		63.178	0.199434	5.19943		64.2294	0.192266	5.19227
2663.26	64.2445	0.192164	0.192164		83.8323	0.0765887	1.07659		74.4023	0.128413	2.12841		83.5862	0.0778657	3.07787		72.4093	0.140206	4.14021		63.3589	0.198192	5.19819		64.1766	0.192624	5.19262
2665.18	64.3118	0.191709	0.191709		83.9347	0.0760587	1.07606		74.4934	0.127882	2.12788		83.6975	0.0772874	3.07729		72.4932	0.139703	4.1397		63.5599	0.196817	5.19682		64.123	0.192986	5.19299
2667.11	64.385	0.191215	0.191215		83.9985	0.0757282	1.07573		74.572	0.127424	2.12742		83.7761	0.0768798	3.07688		72.601	0.139057	4.13906		63.7206	0.19572	5.19572		64.0756	0.193307	5.19331
2669.04	64.4381	0.190858	0.190858		84.0467	0.0754794	1.07548		74.6588	0.126919	2.12692		83.8244	0.0766293	3.07663		72.6794	0.138589	4.13859		63.8478	0.194854	5.19485		64.0186	0.193694	5.19369
2670.97	64.4533	0.190755	0.190755		84.0664	0.0753774	1.07538		74.7265	0.126525	2.12653		83.8446	0.0765249	3.07652		72.7298	0.138288	4.13829		63.9492	0.194165	5.19416		63.9521	0.194145	5.19415
2672.9	64.4491	0.190783	0.190783		84.0255	0.075589	1.07559		74.7543	0.126364	2.12636		83.8186	0.0766594	3.07666		72.7382	0.138238	4.13824		64.0092	0.193757	5.19376		63.8805	0.194632	5.19463
2674.83	64.4282	0.190924	0.190924		83.968	0.075886	1.07589		74.7125	0.126607	2.12661		83.7699	0.0769121	3.07691		72.7114	0.138397	4.1384		64.0233	0.193662	5.19366		63.7889	0.195255	5.19525
2676.76	64.3868	0.191203	0.191203		83.9109	0.0761818	1.07618		74.6218	0.127134	2.12713		83.6885	0.0773344	3.07733		72.6779	0.138598	4.1386		63.9814	0.193946	5.19395		63.6881	0.195941	5.19594
2678.68	64.3572	0.191403	0.191403		83.87	0.0763934	1.07639		74.5602	0.127493	2.12749		83.5951	0.077819	3.07782		72.6381	0.138836	4.13884		63.9458	0.194188	5.19419		63.5908	0.196606	5.19661
2680.61	64.3269	0.191607	0.191607		83.8448	0.076524	1.07652		74.5667	0.127455	2.12746		83.522	0.0781992	3.0782		72.5939	0.1391	4.1391		63.92	0.194363	5.19436		63.5144	0.197128	5.19713
2682.54	64.3097	0.191723	0.191723		83.821	0.0766472	1.07665		74.604	0.127238	2.12724		83.4939	0.0783453	3.07835		72.561	0.139297	4.1393		63.922	0.19435	5.19435		63.4515	0.197558	5.19756
2684.47	64.307	0.191742	0.191742		83.8125	0.0766911	1.07669		74.6313	0.127079	2.12708		83.4993	0.0783171	3.07832		72.5472	0.139379	4.13938		63.9111	0.194424	5.19442		63.3876	0.197996	5.198
2686.4	64.2973	0.191807	0.191807		83.8198	0.0766533	1.07665		74.6691	0.126859	2.12686		83.5049	0.0782879	3.07829		72.5306	0.139479	4.13948		63.8597	0.194773	5.19477		63.3193	0.198464	5.19846
2688.33	64.2805	0.191921	0.191921		83.8417	0.0765402	1.07654		74.6873	0.126753	2.12675		83.4895	0.078368	3.07837		72.521	0.139536	4.13954		63.813	0.195091	5.19509		63.2394	0.199012	5.19901
2690.26	64.2428	0.192176	0.192176		83.8766	0.0763589	1.07636		74.6567	0.126931	2.12693		83.4874	0.0783788	3.07838		72.5278	0.139496	4.1395		63.7738	0.195358	5.19536		63.1465	0.199651	5.19965
2692.18	64.2044	0.192435	0.192435		83.8852	0.0763146	1.07631		74.5717	0.127426	2.12743		83.4976	0.078326	3.07833		72.5237	0.13952	4.13952		63.7377	0.195604	5.1956		63.0627	0.200227	5.20023
2694.11	64.1688	0.192676	0.192676		83.8685	0.0764009	1.0764		74.5131	0.127768	2.12777		83.4854	0.0783895	3.07839		72.5002	0.139661	4.13966		63.7007	0.195856	5.19586		62.9936	0.200704	5.2007
2696.04	64.1293	0.192943	0.192943		83.8326	0.0765873	1.07659		74.4853	0.12793	2.12793		83.4396	0.0786279	3.07863		72.4612	0.139894	4.13989		63.6547	0.196169	5.19617		62.9239	0.201185	5.20118
2697.97	64.0729	0.193326	0.193326		83.7472	0.0770294	1.07703		74.4177	0.128323	2.12832		83.3749	0.0789649	3.07896		72.4115	0.140193	4.14019		63.5833	0.196657	5.19666		62.8481	0.201708	5.20171
2699.9	64.0067	0.193775	0.193775		83.6203	0.0776883	1.07769		74.2889	0.129076	2.12908		83.2998	0.0793558	3.07936		72.3549	0.140532	4.14053		63.4787	0.197372	5.19737		62.7642	0.202288	5.20229
2701.83	63.9219	0.19435	0.19435		83.4802	0.0784167	1.07842		74.1347	0.129979	2.12998		83.1814	0.0799738	3.07997		72.271	0.141036	4.14104		63.3315	0.19838	5.19838		62.6767	0.202894	5.20289
2703.76	63.8157	0.195073	0.195073		83.308	0.0793133	1.07931		73.9721	0.130932	2.13093		82.9889	0.0809801	3.08098		72.1299	0.141885	4.14188		63.1378	0.199711	5.19971		62.5995	0.203429	5.20343
2705.68	63.6816	0.195986	0.195986		83.0884	0.0804596	1.08046		73.7976	0.131958	2.13196		82.7483	0.082241	3.08224		71.9446	0.143001	4.143		62.9306	0.201138	5.20114		62.5187	0.20399	5.20399
2707.61	63.4884	0.197306	0.197306		82.7994	0.0819731	1.08197		73.5826	0.133225	2.13322		82.4632	0.08374	3.08374		71.7104	0.144418	4.14442		62.6602	0.203008	5.20301		62.4455	0.204499	5.2045
2709.54	63.2495	0.198943	0.198943		82.4431	0.0838457	1.08385		73.298	0.134908	2.13491		82.0959	0.0856786	3.08568		71.4265	0.146141	4.14614		62.3213	0.205364	5.20536		62.3712	0.205016	5.20502
2711.47	62.9796	0.2008	0.2008		82.0337	0.0860078	1.08601		72.9533	0.136955	2.13695		81.6399	0.0880977	3.0881		71.0979	0.148143	4.14814		61.9023	0.208293	5.20829		62.2818	0.205639	5.20564
2713.4	62.6496	0.203081	0.203081		81.5736	0.0884503	1.08845		72.553	0.139345	2.13934		81.1525	0.0906982	3.0907		70.7195	0.150461	4.15046		61.4594	0.211411	5.21141		62.1893	0.206284	5.20628
2715.33	62.3201	0.205372	0.205372		81.1017	0.0909703	1.09097		72.1434	0.141803	2.1418		80.6779	0.0932452	3.09325		70.3603	0.152672	4.15267		61.0713	0.214163	5.21416		62.0944	0.206947	5.20695
2717.25	62.041	0.207321	0.207321		80.7096	0.093075	1.09307		71.8093	0.143819	2.14382		80.2748	0.0954206	3.09542		70.0595	0.154533	4.15453		60.7292	0.216603	5.2166		61.997	0.207629	5.20763
2719.18	61.8266	0.208825	0.208825		80.4301	0.0945811	1.09458		71.5714	0.145261	2.14526		80.0118	0.096846	3.09685		69.8066	0.156104	4.1561		60.463	0.21851	5.21851		61.9083	0.208251	5.20825
2721.11	61.7173	0.209593	0.209593		80.2295	0.0956658	1.09567		71.4601	0.145937	2.14594		79.8548	0.0976989	3.0977		69.6183	0.157276	4.15728		60.324	0.21951	5.21951		61.8231	0.208849	5.20885
2723.04	61.7078	0.20966	0.20966		80.1245	0.0962346	1.09623		71.4372	0.146076	2.14608		79.7958	0.0980199	3.09802		69.5299	0.157829	4.15783		60.2721	0.219883	5.21988		61.7387	0.209443	5.20944
2724.97	61.7664	0.209248	0.209248		80.1447	0.0961253	1.09613		71.4772	0.145833	2.14583		79.8684	0.0976247	3.09762		69.551	0.157697	4.1577		60.3402	0.219393	5.21939		61.6521	0.210052	5.21005
2726.9	61.9179	0.208183	0.208183		80.2982	0.0952939	1.09529		71.6255	0.144933	2.14493		80.0376	0.0967057	3.09671		69.6844	0.156864	4.15686		60.526	0.218058	5.21806		61.567	0.210652	5.21065
2728.82	62.1629	0.206469	0.206469		80.5705	0.093824	1.09382		71.8573	0.143529	2.14353		80.2849	0.0953661	3.09537		69.9026	0.155507	4.15551		60.7904	0.216165	5.21616		61.4894	0.2112	5.2112
2730.75	62.461	0.204391	0.204391		80.9302	0.0918893	1.09189		72.1175	0.141959	2.14196		80.6005	0.0936622	3.09366		70.1916	0.153715	4.15371		61.1218	0.213804	5.2138		61.4162	0.211717	5.21172
2732.68	62.7641	0.202288	0.202288		81.3303	0.0897474	1.08975		72.37	0.140441	2.14044		80.9742	0.0916535	3.09165		70.5115	0.15174	4.15174		61.4982	0.211138	5.21114		61.3397	0.212258	5.21226
2734.61	63.0423	0.200368	0.200368		81.7113	0.087718	1.08772		72.6129	0.138986	2.13899		81.3196	0.089805	3.0898		70.7924	0.150013	4.15001		61.815	0.208906	5.20891		61.2644	0.212792	5.21279
2736.54	63.2804	0.198731	0.198731		82.0412	0.085968	1.08597		72.8296	0.137692	2.13769		81.5573	0.0885372	3.08854		71.0135	0.148659	4.14866		62.0431	0.207306	5.20731		61.1782	0.213403	5.2134
2738.47	63.469	0.197439	0.197439		82.2861	0.0846737	1.08467		72.9866	0.136757	2.13676		81.7069	0.0877412	3.08774		71.1775	0.147657	4.14766		62.1985	0.20622	5.20622		61.0912	0.214021	5.21402
2740.4	63.5823	0.196664	0.196664		82.4765	0.0836699	1.08367		73.1049	0.136054	2.13605		81.7829	0.0873375	3.08734		71.3057	0.146876	4.14688		62.3361	0.205261	5.20526		60.9997	0.214673	5.21467
2742.32	63.6615	0.196123	0.196123		82.6575	0.0827177	1.08272		73.189	0.135554	2.13555		81.8137	0.0871742	3.08717		71.4294	0.146123	4.14612		62.4924	0.204173	5.20417		60.9073	0.215331	5.21533
2744.25	63.7246	0.195693	0.195693		82.8153	0.0818897	1.08189		73.2529	0.135175	2.13518		81.8483	0.0869905	3.08699		71.5317	0.145501	4.1455		62.5857	0.203525	5.20353		60.8218	0.215941	5.21594
2746.18	63.7503	0.195518	0.195518		82.9055	0.0814167	1.08142		73.2751	0.135043	2.13504		81.8832	0.086805	3.0868		71.5817	0.145198	4.1452		62.6233	0.203264	5.20326		60.7426	0.216507	5.21651
2748.11	63.7431	0.195567	0.195567		82.916	0.0813616	1.08136		73.228	0.135323	2.13532		81.8576	0.086941	3.08694		71.5917	0.145137	4.14514		62.6227	0.203268	5.20327		60.6584	0.217109	5.21711
2750.04	63.7071	0.195812	0.195812		82.9006	0.0814423	1.08144		73.1198	0.135965	2.13597		81.7873	0.0873143	3.08731		71.5682	0.14528	4.14528		62.5418	0.20383	5.20383		60.5696	0.217746	5.21775
2751.97	63.6508	0.196196	0.196196		82.8516	0.0816989	1.0817		73.0124	0.136603	2.1366		81.702	0.0877674	3.08777		71.5114	0.145625	4.14562		62.4526	0.204449	5.20445		60.4911	0.218308	5.21831
2753.9	63.5745	0.196717	0.196717		82.7579	0.0821905	1.08219		72.8906	0.137328	2.13733		81.5858	0.0883856	3.08839		71.4416	0.146049	4.14605		62.355	0.205129	5.20513		60.4117	0.218879	5.21888
2755.82	63.4507	0.197563	0.197563		82.6391	0.0828145	1.08281		72.7132	0.138387	2.13839		81.4423	0.0891499	3.08915		71.3638	0.146522	4.14652		62.2121	0.206125	5.20613		60.3193	0.219543	5.21954
2757.75	63.2864	0.19869	0.19869		82.5106	0.08349	1.08349		72.4868	0.139741	2.13974		81.2813	0.0900092	3.09001		71.2722	0.14708	4.14708		62.08	0.207048	5.20705		60.2274	0.220206	5.22021
2759.68	63.1319	0.199751	0.199751		82.3559	0.0843053	1.08431		72.2564	0.141123	2.14112		81.1006	0.0909761	3.09098		71.1377	0.1479	4.1479		61.9549	0.207925	5.20792		60.1343	0.220878	5.22088
2761.61	63.0149	0.200557	0.200557		82.1573	0.0853539	1.08535		72.0775	0.1422	2.1422		80.8889	0.0921111	3.09211		70.9697	0.148927	4.14893		61.7536	0.209338	5.20934		60.035	0.221595	5.2216
2763.54	62.8843	0.201457	0.201457		81.9337	0.0865373	1.08654		71.892	0.14332	2.14332		80.6301	0.0935028	3.0935		70.8063	0.149928	4.14993		61.5075	0.211072	5.21107		59.9322	0.22234	5.22234
2765.47	62.7557	0.202347	0.202347		81.6963	0.0877978	1.0878		71.6973	0.144497	2.1445		80.3467	0.0950317	3.09503		70.6387	0.150957	4.15096		61.2496	0.212896	5.2129		59.8356	0.223041	5.22304
2767.39	62.6104	0.203354	0.203354		81.4699	0.0890029	1.089		71.5287	0.14552	2.14552		80.067	0.0965465	3.09655		70.4715	0.151987	4.15199		61.0338	0.21443	5.21443		59.734	0.223778	5.22378
2769.32	62.4513	0.204459	0.204459		81.2459	0.0901985	1.0902		71.3363	0.146689	2.14669		79.7958	0.09802	3.09802		70.3065	0.153005	4.153		60.8924	0.215437	5.21544		59.6396	0.224465	5.22446
2771.25	62.3068	0.205464	0.205464		80.9948	0.0915427	1.09154		71.118	0.14802	2.14802		79.516	0.0995454	3.09955		70.1297	0.154098	4.1541		60.741	0.216518	5.21652		59.554	0.225089	5.22509
2773.18	62.1478	0.206574	0.206574		80.713	0.0930567	1.09306		70.8815	0.149467	2.14947		79.2133	0.101202	3.1012		69.9138	0.155437	4.15544		60.5714	0.217733	5.21773		59.4719	0.225689	5.22569
2775.11	61.9671	0.207839	0.207839		80.4373	0.0945428	1.09454		70.6159	0.151097	2.1511		78.8765	0.103053	3.10305		69.6641	0.156991	4.15699		60.3473	0.219343	5.21934		59.3802	0.226358	5.22636
2777.04	61.7641	0.209264	0.209264		80.15	0.0960963	1.0961		70.3262	0.152883	2.15288		78.4967	0.105149	3.10515		69.3742	0.158802	4.1588		60.0617	0.221403	5.2214		59.2763	0.227119	5.22712
2778.97	61.4989	0.211133	0.211133		79.805	0.0979701	1.09797		70.0233	0.154757	2.15476		78.0519	0.107616	3.10762		69.0286	0.160971	4.16097		59.7422	0.223719	5.22372		59.1736	0.227872	5.22787
2780.89	61.1224	0.213799	0.213799		79.4069	0.100142	1.10014		69.6454	0.157108	2.15711		77.533	0.110513	3.11051		68.657	0.163315	4.16332		59.3248	0.226764	5.22676		59.0693	0.228638	5.22864
2782.82	60.6878	0.216899	0.216899		78.9618	0.102583	1.10258		69.1748	0.160052	2.16005		76.9727	0.113664	3.11366		68.2608	0.165829	4.16583		58.8228	0.230455	5.23045		58.9564	0.229469	5.22947
2784.75	60.2716	0.219887	0.219887		78.472	0.105285	1.10529		68.6419	0.163411	2.16341		76.3997	0.116908	3.11691		67.8326	0.168562	4.16856		58.3115	0.234246	5.23425		58.837	0.230349	5.23035
2786.68	59.8957	0.222605	0.222605		77.9368	0.108257	1.10826		68.1111	0.166782	2.16678		75.8146	0.120247	3.12025		67.3848	0.171438	4.17144		57.7554	0.238407	5.23841		58.7124	0.23127	5.23127
2788.61	59.5358	0.225222	0.225222		77.3696	0.11143	1.11143		67.6028	0.170035	2.17004		75.239	0.123557	3.12356		66.9576	0.1742	4.1742		57.1652	0.242868	5.24287		58.5892	0.232183	5.23218
2790.54	59.142	0.228104	0.228104		76.794	0.114673	1.11467		67.064	0.173511	2.17351		74.6606	0.126908	3.12691		66.5364	0.176941	4.17694		56.5941	0.247229	5.24723		58.4642	0.23311	5.23311
2792.47	58.7391	0.231073	0.231073		76.2037	0.118024	1.11802		66.5214	0.177038	2.17704		74.0755	0.130325	3.13033		66.082	0.179917	4.17992		56.0733	0.251244	5.25124		58.3335	0.234082	5.23408
2794.39	58.3227	0.234162	0.234162		75.574	0.121627	1.12163		65.9709	0.180647	2.18065		73.4792	0.133836	3.13384		65.597	0.183116	4.18312		55.5943	0.25497	5.25497		58.2038	0.235049	5.23505
2796.32	57.8944	0.237363	0.237363		74.909	0.125466	1.12547		65.3892	0.184494	2.18449		72.8335	0.137669	3.13767		65.0865	0.186509	4.18651		55.0987	0.258859	5.25886		58.0674	0.236067	5.23607
2798.25	57.461	0.240627	0.240627		74.2147	0.12951	1.12951		64.783	0.188539	2.18854		72.1453	0.141792	3.14179		64.5474	0.190121	4.19012		54.5732	0.26302	5.26302		57.9238	0.237143	5.23714
2800.18	56.9965	0.244152	0.244152		73.4655	0.133917	1.13392		64.1498	0.192805	2.1928		71.4175	0.146195	3.1462		63.9393	0.194232	4.19423		54.0316	0.267352	5.26735		57.7886	0.238158	5.23816
2802.11	56.4892	0.248034	0.248034		72.6837	0.138563	1.13856		63.4872	0.197314	2.19731		70.629	0.151017	3.15102		63.2799	0.198734	4.19873		53.4505	0.272049	5.27205		57.6508	0.239195	5.23919
2804.04	55.9386	0.252288	0.252288		71.8603	0.143511	1.14351		62.7945	0.202079	2.20208		69.7892	0.156212	3.15621		62.5897	0.203497	4.2035		52.8156	0.277238	5.27724		57.5154	0.240216	5.24022
2805.97	55.3573	0.256825	0.256825		71.0118	0.148669	1.14867		62.0679	0.207133	2.20713		68.9088	0.161726	3.16173		61.8773	0.208468	4.20847		52.132	0.282896	5.2829		57.3898	0.241165	5.24117
2807.89	54.7417	0.261682	0.261682		70.1176	0.154173	1.15417		61.3077	0.212485	2.21249		67.9876	0.16757	3.16757		61.1538	0.213577	4.21358		51.3947	0.289081	5.28908		57.2685	0.242085	5.24208
2809.82	54.1066	0.26675	0.26675		69.1833	0.159999	1.16		60.5238	0.218074	2.21807		67.0535	0.173579	3.17358		60.4017	0.218951	4.21895		50.6356	0.295544	5.29554		57.142	0.243044	5.24304
2811.75	53.4741	0.271857	0.271857		68.2285	0.166034	1.16603		59.6948	0.224063	2.22406		66.0855	0.179894	3.17989		59.6237	0.224581	4.22458		49.8334	0.302479	5.30248		57.011	0.244041	5.24404
2813.68	52.8313	0.277108	0.277108		67.2407	0.172368	1.17237		58.8353	0.230362	2.23036		65.0696	0.186622	3.18662		58.8166	0.2305	4.2305		48.9825	0.309959	5.30996		56.8784	0.245053	5.24505
2815.61	52.1542	0.28271	0.28271		66.2004	0.179139	1.17914		57.9574	0.236891	2.23689		63.9768	0.193977	3.19398		57.9703	0.236795	4.23679		48.0947	0.317903	5.3179		56.7396	0.246114	5.24611
2817.54	51.3997	0.289039	0.289039		65.007	0.18704	1.18704		56.9825	0.244259	2.24426		62.7321	0.20251	3.20251		56.996	0.244156	4.24416		47.0957	0.327018	5.32702		56.5932	0.247236	5.24724
2819.47	50.4245	0.297358	0.297358		63.4707	0.197427	1.19743		55.7825	0.253502	2.2535		61.1786	0.2134	3.2134		55.7441	0.253801	4.2538		45.8653	0.338516	5.33852		56.4465	0.248363	5.24836
2821.39	48.9706	0.310065	0.310065		61.3392	0.212262	1.21226		54.0694	0.267049	2.26705		59.0772	0.22858	3.22858		53.9992	0.267613	4.26761		44.1852	0.354723	5.35472		56.2969	0.249516	5.24952
2823.32	46.7287	0.330416	0.330416		58.403	0.233565	1.23356		51.5214	0.288012	2.28801		56.2174	0.25013	3.25013		51.5766	0.287547	4.28755		41.9183	0.377596	5.3776		56.1317	0.250792	5.25079
2825.25	43.5851	0.360662	0.360662		54.6151	0.262688	1.26269		48.0727	0.318101	2.3181		52.5536	0.279397	3.2794		48.4333	0.314856	4.31486		39.1366	0.407417	5.40742		55.9574	0.252143	5.25214
2827.18	39.7972	0.400148	0.400148		50.1248	0.299947	1.29995		44.0046	0.356502	2.3565		48.2161	0.316808	3.31681		44.6608	0.350074	4.35007		35.9536	0.444257	5.44426		55.7869	0.253468	5.25347
2829.11	35.8744	0.445215	0.445215		45.2654	0.344233	1.34423		39.833	0.399757	2.39976		43.5292	0.36122	3.36122		40.5347	0.392173	4.39217		32.5603	0.487312	5.48731		55.6163	0.254798	5.2548
2831.04	32.3564	0.490039	0.490039		40.4612	0.392962	1.39296		36.0777	0.442762	2.44276		38.9472	0.409524	3.40952		36.4453	0.438359	4.43836		29.2532	0.533826	5.53383		55.446	0.25613	5.25613
2832.96	29.5969	0.528753	0.528753		36.1737	0.441607	1.44161		33.0867	0.480346	2.48035		34.954	0.456503	3.4565		32.8202	0.483859	4.48386		26.3785	0.578749	5.57875		55.2661	0.257541	5.25754
2834.89	27.7238	0.557147	0.557147		32.8113	0.483976	1.48398		31.0376	0.508111	2.50811		31.9806	0.495113	3.49511		30.0298	0.522448	4.52245		24.2457	0.615366	5.61537		55.0735	0.259057	5.25906
2836.82	26.7764	0.572248	0.572248		30.7614	0.511993	1.51199		29.9584	0.523482	2.52348		30.3556	0.517762	3.51776		28.369	0.547156	4.54716		23.085	0.636671	5.63667		54.8766	0.260613	5.26061
2838.75	26.7734	0.572297	0.572297		30.257	0.519174	1.51917		29.8136	0.525585	2.52558		30.2086	0.519869	3.51987		28.0068	0.552736	4.55274		23.0168	0.637955	5.63795		54.6796	0.262175	5.26217
2840.68	27.7139	0.557302	0.557302		31.3451	0.50383	1.50383		30.5911	0.514404	2.5144		31.5184	0.501435	3.50144		28.9401	0.538499	4.5385		24.0595	0.618714	5.61871		54.4715	0.26383	5.26383
2842.61	29.6025	0.528672	0.528672		33.8934	0.469885	1.46989		32.2811	0.491052	2.49105		34.1213	0.466974	3.46697		31.0418	0.508053	4.50805		26.0651	0.583941	5.58394		54.2513	0.26559	5.26559
2844.53	32.3672	0.489895	0.489895		37.5214	0.425721	1.42572		34.7884	0.458566	2.45857		37.6416	0.424331	3.42433		34.0216	0.468245	4.46825		28.7402	0.541511	5.54151		54.0337	0.267335	5.26733
2846.46	35.7783	0.44638	0.44638		41.6453	0.380434	1.38043		37.8639	0.421775	2.42178		41.5021	0.38193	3.38193		37.3811	0.427348	4.42735		31.6567	0.499535	5.49953		53.8171	0.26908	5.26908
2848.39	39.3046	0.405557	0.405557		45.5322	0.341681	1.34168		40.9644	0.387594	2.38759		44.9863	0.34692	3.34692		40.5134	0.392401	4.3924		34.2932	0.464792	5.46479		53.5923	0.270898	5.2709
2850.32	42.0285	0.376456	0.376456		48.4387	0.314808	1.31481		43.3132	0.36338	2.36338		47.3803	0.324402	3.3244		42.8078	0.368477	4.36848		36.1497	0.441896	5.4419		53.3549	0.272826	5.27283
2852.25	43.0471	0.366057	0.366057		49.8253	0.30255	1.30255		44.169	0.354883	2.35488		48.1942	0.317005	3.31701		43.7913	0.358612	4.35861		36.8713	0.433311	5.43331		53.0955	0.274942	5.27494
2854.18	42.0846	0.375877	0.375877		49.5001	0.305393	1.30539		43.2646	0.363867	2.36387		47.3369	0.3248	3.3248		43.3165	0.363347	4.36335		36.3713	0.439241	5.43924		52.8194	0.277207	5.27721
2856.11	39.6559	0.401692	0.401692		47.633	0.322092	1.32209		41.0296	0.386902	2.3869		45.1074	0.345752	3.34575		41.5897	0.381015	4.38101		34.8204	0.458166	5.45817		52.5381	0.279526	5.27953
2858.03	36.6045	0.436466	0.436466		44.6347	0.350327	1.35033		38.1738	0.418234	2.41823		42.0183	0.376561	3.37656		39.0179	0.408736	4.40874		32.5562	0.487366	5.48737		52.2574	0.281852	5.28185
2859.96	33.5639	0.474127	0.474127		41.0109	0.3871	1.3871		35.2842	0.45242	2.45242		38.6015	0.413395	3.4134		36.0615	0.442956	4.44296		29.9659	0.523372	5.52337		51.9576	0.284351	5.28435
2861.89	30.8361	0.510941	0.510941		37.2191	0.429234	1.42923		32.6996	0.485457	2.48546		35.2799	0.452472	3.45247		33.0923	0.480273	4.48027		27.3659	0.562791	5.56279		51.6308	0.287091	5.28709
2863.82	28.5463	0.54445	0.54445		33.6256	0.47333	1.47333		30.5084	0.51558	2.51558		32.3035	0.49075	3.49075		30.3477	0.517875	4.51787		24.9852	0.602318	5.60232		51.2995	0.289887	5.28989
2865.75	26.7289	0.573019	0.573019		30.5186	0.515435	1.51544		28.7301	0.541662	2.54166		29.8275	0.525383	3.52538		27.9973	0.552885	4.55288		23.0035	0.638207	5.63821		50.9898	0.292517	5.29252
2867.68	25.4273	0.5947	0.5947		28.1396	0.550682	1.55068		27.425	0.561854	2.56185		28.0146	0.552615	3.55261		26.2074	0.581577	4.58158		21.575	0.666049	5.66605		50.6959	0.295028	5.29503
2869.61	24.6944	0.607402	0.607402		26.666	0.574042	1.57404		26.6672	0.574022	2.57402		27.0228	0.568269	3.56827		25.1183	0.60001	4.60001		20.7778	0.6824	5.6824		50.4288	0.297322	5.29732
2871.53	24.5216	0.610451	0.610451		26.1392	0.582708	1.58271		26.4761	0.577146	2.57715		26.8569	0.570944	3.57094		24.7849	0.605813	4.60581		20.6004	0.686124	5.68612		50.2029	0.299271	5.29927
2873.46	24.8499	0.604674	0.604674		26.4263	0.577964	1.57796		26.787	0.572076	2.57208		27.374	0.562662	3.56266		25.1005	0.600317	4.60032		20.9224	0.679389	5.67939		50.0095	0.300948	5.30095
2875.39	25.5204	0.593112	0.593112		27.2215	0.565088	1.56509		27.4361	0.561677	2.56168		28.2739	0.548614	3.54861		25.8147	0.588133	4.58813		21.5133	0.667292	5.66729		49.8523	0.302315	5.30231
2877.32	26.2693	0.580551	0.580551		28.1291	0.550844	1.55084		28.2	0.549752	2.54975		29.2007	0.534607	3.53461		26.6127	0.574912	4.57491		22.1301	0.655017	5.65502		49.7266	0.303411	5.30341
2879.25	26.8881	0.57044	0.57044		28.8857	0.539317	1.53932		28.8468	0.539902	2.5399		29.9318	0.523867	3.52387		27.2645	0.564403	4.5644		22.6312	0.645293	5.64529		49.6303	0.304253	5.30425
2881.18	27.3505	0.563034	0.563034		29.423	0.531313	1.53131		29.3092	0.532996	2.533		30.4683	0.516152	3.51615		27.7382	0.556922	4.55692		22.9983	0.638304	5.6383		49.5633	0.30484	5.30484
2883.11	27.7336	0.556993	0.556993		29.7777	0.526109	1.52611		29.6586	0.527849	2.52785		30.8938	0.510128	3.51013		28.0906	0.551439	4.55144		23.255	0.633483	5.63348		49.5244	0.305181	5.30518
2885.03	28.073	0.551712	0.551712		29.9732	0.523267	1.52327		29.918	0.524068	2.52407		31.2236	0.505516	3.50552		28.3452	0.547521	4.54752		23.4227	0.630364	5.63036		49.4983	0.30541	5.30541
2886.96	28.2994	0.548222	0.548222		29.9585	0.52348	1.52348		30.0193	0.5226	2.5226		31.3843	0.503288	3.50329		28.4523	0.545883	4.54588		23.4603	0.629666	5.62967		49.4639	0.305712	5.30571
2888.89	28.2511	0.548965	0.548965		29.6214	0.528394	1.52839		29.8438	0.525146	2.52515		31.2326	0.505391	3.50539		28.2915	0.548344	4.54834		23.2728	0.633151	5.63315		49.4185	0.306111	5.30611
2890.82	27.7976	0.555993	0.555993		28.8799	0.539404	1.5394		29.2708	0.533566	2.53357		30.6197	0.513998	3.514		27.7368	0.556944	4.55694		22.7917	0.642224	5.64222		49.3619	0.306608	5.30661
2892.75	26.8807	0.57056	0.57056		27.7171	0.557253	1.55725		28.2548	0.548908	2.54891		29.5158	0.529945	3.52994		26.7611	0.572496	4.5725		22.015	0.657281	5.65728		49.3031	0.307126	5.30713
2894.68	25.553	0.592559	0.592559		26.1961	0.581763	1.58176		26.8831	0.570521	2.57052		28.0087	0.552708	3.55271		25.4281	0.594686	4.59469		20.998	0.677822	5.67782		49.2369	0.307709	5.30771
2896.6	23.9857	0.620048	0.620048		24.4295	0.612085	1.61209		25.2908	0.597038	2.59704		26.236	0.581102	3.5811		23.8422	0.622653	4.62265		19.8142	0.703023	5.70302		49.164	0.308353	5.30835
2898.53	22.3534	0.650656	0.650656		22.5336	0.647169	1.64717		23.637	0.626408	2.62641		24.3232	0.613979	3.61398		22.1268	0.655082	4.65508		18.5396	0.7319	5.7319		49.0903	0.309004	5.309
2900.46	20.7323	0.683352	0.683352		20.6135	0.685848	1.68585		21.9936	0.657704	2.6577		22.3595	0.650538	3.65054		20.3738	0.690928	4.69093		17.2435	0.763375	5.76337		49.0023	0.309783	5.30978
2902.39	19.0981	0.719009	0.719009		18.7284	0.727498	1.7275		20.3474	0.691491	2.69149		20.3791	0.690814	3.69081		18.6198	0.730025	4.73002		15.9601	0.796964	5.79696		48.9015	0.310677	5.31068
2904.32	17.3997	0.759457	0.759457		16.9058	0.771966	1.77197		18.6688	0.728884	2.72888		18.4073	0.735011	3.73501		16.8796	0.772638	4.77264		14.7177	0.832161	5.83216		48.7914	0.311657	5.31166
2906.25	15.695	0.804239	0.804239		15.1921	0.818382	1.81838		17.0022	0.769495	2.76949		16.4871	0.782857	3.78286		15.194	0.818329	4.81833		13.5471	0.868152	5.86815		48.6623	0.312807	5.31281
2908.18	14.1399	0.849552	0.849552		13.6416	0.865135	1.86514		15.4818	0.810179	2.81018		14.7183	0.832143	3.83214		13.6472	0.864956	4.86496		12.4767	0.903899	5.9039		48.5157	0.314118	5.31412
2910.1	12.8662	0.890549	0.890549		12.316	0.909532	1.90953		14.2142	0.847276	2.84728		13.2005	0.879408	3.87941		12.3201	0.909387	4.90939		11.5709	0.936632	5.93663		48.3597	0.315517	5.31552
2912.03	11.926	0.923505	0.923505		11.2729	0.947964	1.94796		13.2578	0.877528	2.87753		11.992	0.921109	3.92111		11.2666	0.948208	4.94821		10.8745	0.963591	5.96359		48.2031	0.316925	5.31693
2913.96	11.3215	0.946094	0.946094		10.5401	0.977156	1.97716		12.6189	0.898979	2.89898		11.1272	0.953613	3.95361		10.5081	0.978476	4.97848		10.3941	0.983211	5.98321		48.0547	0.318264	5.31826
2915.89	11.057	0.956364	0.956364		10.1468	0.99367	1.99367		12.3057	0.909893	2.90989		10.6312	0.973416	3.97342		10.0707	0.996942	4.99694		10.1479	0.993622	5.99362		47.9012	0.319654	5.31965
2917.82	11.1498	0.952732	0.952732		10.1536	0.993379	1.99338		12.3422	0.908606	2.90861		10.5782	0.97559	3.97559		10.007	0.999694	4.99969		10.1755	0.992442	5.99244		47.7401	0.321116	5.32112
2919.75	11.6366	0.934172	0.934172		10.6512	0.972602	1.9726		12.7647	0.89399	2.89399		11.0974	0.95478	3.95478		10.4208	0.982097	4.9821		10.5607	0.976306	5.97631		47.6042	0.322355	5.32236
2921.68	12.5943	0.899828	0.899828		11.7617	0.929528	1.92953		13.6427	0.8651	2.8651		12.3354	0.908849	3.90885		11.4455	0.941364	4.94136		11.4146	0.942541	5.94254		47.49	0.323397	5.3234
2923.6	14.1351	0.849702	0.849702		13.5929	0.866688	1.86669		15.057	0.822261	2.82226		14.4014	0.841595	3.84159		13.1644	0.880598	4.8806		12.8111	0.892412	5.89241		47.4001	0.324221	5.32422
2925.53	16.3535	0.78639	0.78639		16.1846	0.790899	1.7909		17.0813	0.76748	2.76748		17.3016	0.761914	3.76191		15.5764	0.807532	4.80753		14.7575	0.830986	5.83099		47.3599	0.324589	5.32459
2927.46	19.2258	0.716115	0.716115		19.4629	0.710792	1.71079		19.7013	0.705505	2.70551		20.8363	0.681179	3.68118		18.5756	0.731056	4.73106		17.1443	0.765881	5.76588		47.364	0.324552	5.32455
2929.39	22.5375	0.647093	0.647093		23.1467	0.635511	1.63551		22.734	0.643324	2.64332		24.6382	0.60839	3.60839		21.8808	0.659938	4.65994		19.7306	0.704859	5.70486		47.3916	0.324298	5.3243
2931.32	25.8748	0.587123	0.587123		26.778	0.572222	1.57222		25.8225	0.588002	2.588		28.2124	0.549561	3.54956		25.0754	0.600753	4.60075		22.1838	0.653964	5.65396		47.4608	0.323665	5.32367
2933.25	28.672	0.542541	0.542541		29.8488	0.525073	1.52507		28.528	0.544728	2.54473		31.0504	0.507934	3.50793		27.7178	0.557241	4.55724		24.1623	0.616862	5.61686		47.5694	0.322672	5.32267
2935.18	30.2851	0.518771	0.518771		31.9462	0.49558	1.49558		30.3032	0.518512	2.51851		32.768	0.484551	3.48455		29.4418	0.531036	4.53104		25.3804	0.595501	5.5955		47.7251	0.321253	5.32125
2937.1	30.2179	0.519736	0.519736		32.7926	0.484224	1.48422		30.6265	0.513903	2.5139		33.1394	0.479655	3.47966		30.0047	0.522811	4.52281		25.6945	0.590159	5.59016		47.9329	0.319366	5.31937
2939.03	28.5066	0.545054	0.545054		32.3087	0.49068	1.49068		29.4448	0.530991	2.53099		32.1504	0.492813	3.49281		29.3667	0.532145	4.53215		25.0905	0.600492	5.60049		48.182	0.317116	5.31712
2940.96	25.853	0.587489	0.587489		30.6369	0.513755	1.51375		27.2495	0.564641	2.56464		30.0458	0.522216	3.52222		27.7053	0.557438	4.55744		23.6907	0.625423	5.62542		48.4586	0.31463	5.31463
2942.89	23.0781	0.6368	0.6368		28.1	0.551294	1.55129		24.7463	0.60649	2.60649		27.2754	0.564229	3.56423		25.3728	0.595632	4.59563		21.7769	0.662003	5.662		48.7428	0.312089	5.31209
2944.82	20.6431	0.685225	0.685225		25.1374	0.599679	1.59968		22.4248	0.649271	2.64927		24.3264	0.613923	3.61392		22.7742	0.642556	4.64256		19.6829	0.705912	5.70591		49.0314	0.309526	5.30953
2946.75	18.6965	0.728239	0.728239		22.1885	0.653871	1.65387		20.5061	0.688118	2.68812		21.544	0.666674	3.66667		20.2605	0.69335	4.69335		17.6822	0.752463	5.75246		49.3207	0.306971	5.30697
2948.67	17.2582	0.763005	0.763005		19.5945	0.707866	1.70787		19.0634	0.7198	2.7198		19.1746	0.717274	3.71727		18.0884	0.7426	4.7426		15.97	0.796696	5.7967		49.5845	0.304654	5.30465
2950.6	16.3536	0.786387	0.786387		17.6511	0.753228	1.75323		18.1552	0.740998	2.741		17.4848	0.757339	3.75734		16.4717	0.783263	4.78326		14.7367	0.8316	5.8316		49.8226	0.302573	5.30257
2952.53	16.0715	0.793943	0.793943		16.6383	0.778891	1.77889		17.8824	0.747573	2.74757		16.7542	0.775877	3.77588		15.6476	0.805552	4.80555		14.1877	0.848089	5.84809		50.0338	0.300737	5.30074
2954.46	16.5046	0.782395	0.782395		16.7556	0.77584	1.77584		18.3615	0.736093	2.73609		17.1424	0.765928	3.76593		15.8216	0.80075	4.80075		14.4316	0.840686	5.84069		50.2152	0.299165	5.29917
2956.39	17.7039	0.751932	0.751932		18.0142	0.744386	1.74439		19.5806	0.708175	2.70817		18.6711	0.72883	3.72883		17.0476	0.768337	4.76834		15.4609	0.810766	5.81077		50.3635	0.297884	5.29788
2958.32	19.6838	0.705891	0.705891		20.2714	0.693117	1.69312		21.403	0.669525	2.66952		21.2135	0.673388	3.67339		19.1891	0.716945	4.71695		17.1594	0.765498	5.7655		50.4993	0.296715	5.29671
2960.24	22.3175	0.651354	0.651354		23.3154	0.632357	1.63236		23.7512	0.624314	2.62431		24.5729	0.609544	3.60954		22.0261	0.657062	4.65706		19.4175	0.711806	5.71181		50.638	0.295523	5.29552
2962.17	25.3618	0.595819	0.595819		26.9728	0.569074	1.56907		26.4783	0.577109	2.57711		28.5697	0.544095	3.54409		25.388	0.595372	4.59537		22.1394	0.654834	5.65483		50.7883	0.294237	5.29424
2964.1	28.6496	0.542881	0.542881		31.1303	0.506816	1.50682		29.4523	0.53088	2.53088		33.1359	0.479702	3.4797		29.1571	0.535256	4.53526		25.2767	0.597279	5.59728		50.9494	0.292861	5.29286
2966.03	32.247	0.491511	0.491511		35.7203	0.447084	1.44708		32.7466	0.484833	2.48483		38.2577	0.417281	3.41728		33.31	0.477425	4.47742		28.8229	0.540262	5.54026		51.1288	0.291334	5.29133
2967.96	36.4063	0.438823	0.438823		40.6989	0.390417	1.39042		36.5733	0.436836	2.43684		43.8997	0.357538	3.35754		37.832	0.42214	4.42214		32.7262	0.485104	5.4851		51.3343	0.289593	5.28959
2969.89	41.2033	0.385068	0.385068		46.0053	0.337193	1.33719		41.0078	0.387134	2.38713		49.9176	0.301746	3.30175		42.6482	0.370099	4.3701		36.9196	0.432742	5.43274		51.5516	0.287758	5.28776
2971.82	46.3234	0.334199	0.334199		51.4688	0.288456	1.28846		45.823	0.338916	2.33892		56.023	0.251634	3.25163		47.5588	0.322769	4.32277		41.2356	0.384727	5.38473		51.7778	0.285856	5.28586
2973.74	51.148	0.291171	0.291171		56.8158	0.245531	1.24553		50.6061	0.295798	2.2958		61.7669	0.209244	3.20924		52.2331	0.282055	4.28205		45.3865	0.343073	5.34307		52.0194	0.283835	5.28383
2975.67	55.16	0.258376	0.258376		61.7552	0.209327	1.20933		54.9565	0.259981	2.25998		66.833	0.175009	3.17501		56.397	0.248744	4.24874		49.1396	0.308568	5.30857		52.2638	0.281799	5.2818
2977.6	58.2553	0.234665	0.234665		66.1072	0.179751	1.17975		58.7698	0.230846	2.23085		71.1238	0.147985	3.14799		59.935	0.22232	4.22232		52.3962	0.2807	5.2807		52.5043	0.279805	5.27981
2979.53	60.6204	0.217381	0.217381		69.8174	0.156036	1.15604		62.102	0.206895	2.20689		74.6663	0.126875	3.12688		62.8547	0.201662	4.20166		55.1726	0.258277	5.25828		52.7371	0.277884	5.27788
2981.46	62.441	0.20453	0.20453		72.9386	0.137042	1.13704		64.8969	0.187776	2.18778		77.4995	0.110701	3.1107		65.2415	0.185476	4.18548		57.5096	0.24026	5.24026		52.9574	0.276073	5.27607
2983.39	63.8411	0.194899	0.194899		75.5622	0.121695	1.1217		66.8753	0.174734	2.17473		79.7469	0.098286	3.09829		67.2056	0.172595	4.17259		59.4513	0.225839	5.22584		53.1558	0.274449	5.27445
2985.32	64.9691	0.187293	0.187293		77.7575	0.109258	1.10926		67.9671	0.167702	2.1677		81.5595	0.0885254	3.08853		68.8227	0.162268	4.16227		61.1	0.213959	5.21396		53.3218	0.273096	5.2731
2987.24	65.8828	0.181228	0.181228		79.6	0.0990867	1.09909		68.6915	0.163097	2.1631		83.0355	0.0807361	3.08074		70.1615	0.153901	4.1539		62.4742	0.204299	5.2043		53.4674	0.271911	5.27191
2989.17	66.6356	0.176294	0.176294		81.1691	0.0906092	1.09061		69.2888	0.159337	2.15934		84.2768	0.0742922	3.07429		71.2857	0.146998	4.147		63.6215	0.196396	5.1964		53.6027	0.270814	5.27081
2991.1	67.2451	0.17234	0.17234		82.4825	0.0836382	1.08364		69.7558	0.15642	2.15642		85.3671	0.0687093	3.06871		72.2246	0.141315	4.14131		64.6034	0.189745	5.18974		53.7133	0.269918	5.26992
2993.03	67.6944	0.169447	0.169447		83.5645	0.077978	1.07798		70.1152	0.154188	2.15419		86.234	0.0643213	3.06432		72.9783	0.136806	4.13681		65.4144	0.184327	5.18433		53.7863	0.269328	5.26933
2994.96	68.051	0.167166	0.167166		84.4794	0.0732494	1.07325		70.378	0.152563	2.15256		86.9068	0.0609463	3.06095		73.5822	0.133227	4.13323		66.0541	0.1801	5.1801		53.8264	0.269005	5.269
2996.89	68.3613	0.16519	0.16519		85.2757	0.0691747	1.06917		70.555	0.151472	2.15147		87.4284	0.0583472	3.05835		74.0994	0.130186	4.13019		66.625	0.176363	5.17636		53.8333	0.268949	5.26895
2998.82	68.6463	0.163383	0.163383		85.9467	0.065771	1.06577		70.7248	0.150429	2.15043		87.8574	0.0562216	3.05622		74.5633	0.127475	4.12748		67.2041	0.172604	5.1726		53.8095	0.269141	5.26914
3000.74	68.8812	0.161899	0.161899		86.5016	0.0629759	1.06298		70.9397	0.149111	2.14911		88.1951	0.0545556	3.05456		74.9568	0.125189	4.12519		67.7201	0.169283	5.16928		53.7636	0.269512	5.26951
3002.67	69.0777	0.160662	0.160662		86.9627	0.0606671	1.06067		71.1375	0.147902	2.1479		88.468	0.0532136	3.05321		75.2927	0.123247	4.12325		68.1058	0.166816	5.16682		53.6826	0.270166	5.27017
3004.6	69.2391	0.159649	0.159649		87.3512	0.058731	1.05873		71.2714	0.147085	2.14708		88.6999	0.0520768	3.05208		75.5814	0.121585	4.12159		68.3856	0.165035	5.16504		53.5755	0.271033	5.27103
3006.53	69.3603	0.158889	0.158889		87.6608	0.0571944	1.05719		71.3339	0.146704	2.1467		88.9144	0.0510279	3.05103		75.8091	0.120278	4.12028		68.6476	0.163375	5.16337		53.4444	0.272098	5.2721
3008.46	69.4257	0.15848	0.15848		87.9237	0.0558938	1.05589		71.3903	0.146361	2.14636		89.0831	0.0502048	3.0502		75.9888	0.11925	4.11925		68.8795	0.16191	5.16191		53.2758	0.27347	5.27347
3010.39	69.458	0.158278	0.158278		88.1637	0.0547102	1.05471		71.4936	0.145733	2.14573		89.215	0.0495624	3.04956		76.1528	0.118314	4.11831		69.0443	0.160872	5.16087		53.101	0.274897	5.2749
3012.31	69.4985	0.158024	0.158024		88.3751	0.0536702	1.05367		71.6326	0.14489	2.14489		89.3382	0.0489627	3.04896		76.2977	0.117488	4.11749		69.1723	0.160068	5.16007		52.9243	0.276345	5.27634
3014.24	69.576	0.15754	0.15754		88.5979	0.0525766	1.05258		71.7921	0.143923	2.14392		89.4714	0.0483159	3.04832		76.4021	0.116895	4.11689		69.2531	0.159561	5.15956		52.7453	0.277816	5.27782
3016.17	69.6663	0.156977	0.156977		88.7943	0.0516151	1.05162		71.935	0.14306	2.14306		89.6167	0.0476111	3.04761		76.4959	0.116362	4.11636		69.2888	0.159337	5.15934		52.5776	0.279199	5.2792
3018.1	69.7601	0.156393	0.156393		88.909	0.0510545	1.05105		72.0185	0.142556	2.14256		89.7673	0.0468819	3.04688		76.5602	0.115997	4.116		69.271	0.159449	5.15945		52.4088	0.280596	5.2806
3020.03	69.856	0.155796	0.155796		89.0203	0.0505108	1.05051		72.0155	0.142574	2.14257		89.8083	0.0466834	3.04668		76.5532	0.116037	4.11604		69.1706	0.160079	5.16008		52.2197	0.282165	5.28217
3021.96	69.9615	0.155141	0.155141		89.1302	0.049975	1.04997		71.9768	0.142807	2.14281		89.7707	0.0468655	3.04687		76.5384	0.11612	4.11612		69.041	0.160893	5.16089		52.0207	0.283824	5.28382
3023.89	70.0785	0.154415	0.154415		89.2069	0.0496014	1.0496		72.0212	0.14254	2.14254		89.6986	0.0472144	3.04721		76.5571	0.116015	4.11601		69.0266	0.160984	5.16098		51.8217	0.285489	5.28549
3025.81	70.1924	0.15371	0.15371		89.2679	0.0493049	1.0493		72.1682	0.141654	2.14165		89.6211	0.0475899	3.04759		76.5873	0.115843	4.11584		69.1809	0.160014	5.16001		51.6217	0.287168	5.28717
3027.74	70.25	0.153354	0.153354		89.3276	0.0490143	1.04901		72.383	0.140364	2.14036		89.5596	0.047888	3.04789		76.6311	0.115595	4.11559		69.4048	0.15861	5.15861		51.4095	0.288956	5.28896
3029.67	70.2295	0.153481	0.153481		89.3686	0.048815	1.04881		72.6261	0.138907	2.13891		89.5032	0.0481616	3.04816		76.6856	0.115286	4.11529		69.5491	0.157709	5.15771		51.1762	0.290932	5.29093
3031.6	70.1655	0.153876	0.153876		89.405	0.0486383	1.04864		72.8689	0.137458	2.13746		89.4762	0.0482925	3.04829		76.7389	0.114984	4.11498		69.6475	0.157094	5.15709		50.9515	0.292843	5.29284
3033.53	70.1162	0.154182	0.154182		89.4228	0.0485519	1.04855		73.1746	0.13564	2.13564		89.4985	0.0481843	3.04818		76.7851	0.114723	4.11472		69.7549	0.156425	5.15643		50.735	0.294692	5.29469
3035.46	70.0548	0.154562	0.154562		89.432	0.0485073	1.04851		73.6067	0.133082	2.13308		89.4971	0.0481913	3.04819		76.838	0.114424	4.11442		69.791	0.156201	5.1562		50.5271	0.296475	5.29648
3037.39	69.9765	0.155048	0.155048		89.4544	0.0483984	1.0484		74.0982	0.130192	2.13019		89.4822	0.0482635	3.04826		76.8811	0.11418	4.11418		69.7731	0.156312	5.15631		50.345	0.298043	5.29804
3039.31	69.8931	0.155566	0.155566		89.5106	0.0481254	1.04813		74.6032	0.127242	2.12724		89.5173	0.0480929	3.04809		76.9068	0.114035	4.11404		69.7786	0.156277	5.15628		50.1587	0.299653	5.29965
3041.24	69.8225	0.156005	0.156005		89.6013	0.0476856	1.04769		75.0627	0.124576	2.12458		89.5791	0.0477935	3.04779		76.9388	0.113855	4.11385		69.7362	0.156542	5.15654		49.9663	0.301322	5.30132
3043.17	69.7997	0.156146	0.156146		89.6753	0.0473272	1.04733		75.4188	0.12252	2.12252		89.647	0.0474645	3.04746		76.9962	0.113531	4.11353		69.5955	0.157419	5.15742		49.7912	0.302848	5.30285
3045.1	69.8229	0.156002	0.156002		89.6978	0.0472182	1.04722		75.648	0.121202	2.1212		89.7045	0.0471857	3.04719		77.0209	0.113392	4.11339		69.4186	0.158524	5.15852		49.6235	0.304313	5.30431
3047.03	69.8663	0.155732	0.155732		89.7339	0.0470435	1.04704		75.7374	0.12069	2.12069		89.6478	0.0474603	3.04746		77.0009	0.113504	4.1135		69.1967	0.159915	5.15991		49.4388	0.305932	5.30593
3048.96	69.9329	0.155319	0.155319		89.783	0.0468059	1.04681		75.8092	0.120278	2.12028		89.4898	0.0482267	3.04823		76.9824	0.113609	4.11361		68.9952	0.161181	5.16118		49.2328	0.307745	5.30775
3050.89	69.9786	0.155035	0.155035		89.7945	0.0467501	1.04675		75.8795	0.119875	2.11988		89.3213	0.0490448	3.04904		76.9616	0.113726	4.11373		68.9202	0.161653	5.16165		49.0301	0.309537	5.30954
3052.81	69.9606	0.155147	0.155147		89.8253	0.0466015	1.0466		75.8974	0.119773	2.11977		89.2057	0.0496072	3.04961		76.9307	0.1139	4.1139		68.9803	0.161275	5.16127		48.844	0.311189	5.31119
3054.74	69.9107	0.155457	0.155457		89.876	0.0463561	1.04636		75.9097	0.119703	2.1197		89.1461	0.0498976	3.0499		76.9036	0.114053	4.11405		69.0963	0.160545	5.16055		48.6662	0.312773	5.31277
3056.67	69.8518	0.155822	0.155822		89.8624	0.0464218	1.04642		75.9195	0.119647	2.11965		89.1115	0.0500664	3.05007		76.8528	0.11434	4.11434		69.135	0.160302	5.1603		48.4892	0.314355	5.31436
3058.6	69.8247	0.155991	0.155991		89.8212	0.0466211	1.04662		75.8988	0.119765	2.11976		89.0773	0.0502327	3.05023		76.7824	0.114738	4.11474		69.1479	0.160221	5.16022		48.3317	0.315768	5.31577
3060.53	69.8396	0.155898	0.155898		89.7721	0.0468584	1.04686		75.8574	0.120002	2.12		89.0421	0.0504046	3.0504		76.7225	0.115077	4.11508		69.1815	0.16001	5.16001		48.182	0.317115	5.31712
3062.46	69.8364	0.155918	0.155918		89.7248	0.0470874	1.04709		75.8398	0.120103	2.1201		88.985	0.0506833	3.05068		76.6836	0.115298	4.1153		69.2424	0.159628	5.15963		48.0393	0.318404	5.3184
3064.38	69.7933	0.156186	0.156186		89.6981	0.0472165	1.04722		75.8229	0.1202	2.1202		88.9604	0.0508032	3.0508		76.646	0.115511	4.11551		69.3747	0.158799	5.1588		47.9033	0.319634	5.31963
3066.31	69.7465	0.156477	0.156477		89.6735	0.047336	1.04734		75.8209	0.120211	2.12021		88.9945	0.0506368	3.05064		76.628	0.115612	4.11561		69.4885	0.158087	5.15809		47.7745	0.320804	5.3208
3068.24	69.7363	0.156541	0.156541		89.634	0.0475273	1.04753		75.798	0.120342	2.12034		89.0395	0.0504173	3.05042		76.6418	0.115534	4.11553		69.4951	0.158046	5.15805		47.6493	0.321944	5.32194
3070.17	69.7675	0.156347	0.156347		89.5877	0.0477518	1.04775		75.7825	0.120431	2.12043		89.0863	0.0501891	3.05019		76.6689	0.115381	4.11538		69.5028	0.157998	5.158		47.5259	0.32307	5.32307
3072.1	69.775	0.1563	0.1563		89.5411	0.0479777	1.04798		75.8295	0.120162	2.12016		89.0371	0.0504292	3.05043		76.6938	0.11524	4.11524		69.5274	0.157844	5.15784		47.4077	0.324151	5.32415
3074.03	69.7594	0.156397	0.156397		89.5242	0.0480597	1.04806		75.8959	0.119782	2.11978		88.9758	0.0507279	3.05073		76.724	0.115069	4.11507		69.5129	0.157935	5.15793		47.2922	0.32521	5.32521
3075.95	69.7331	0.156561	0.156561		89.5176	0.0480915	1.04809		75.9721	0.119346	2.11935		88.9635	0.0507882	3.05079		76.7543	0.114897	4.1149		69.4667	0.158223	5.15822		47.175	0.326288	5.32629
3077.88	69.6578	0.15703	0.15703		89.4796	0.0482759	1.04828		75.9829	0.119284	2.11928		88.9309	0.0509471	3.05095		76.7812	0.114745	4.11475		69.3819	0.158754	5.15875		47.0717	0.32724	5.32724
3079.81	69.596	0.157416	0.157416		89.487	0.0482398	1.04824		75.9588	0.119422	2.11942		88.8834	0.0511795	3.05118		76.7855	0.114721	4.11472		69.2507	0.159576	5.15958		46.9791	0.328096	5.3281
3081.74	69.6149	0.157298	0.157298		89.543	0.0479686	1.04797		75.961	0.119409	2.11941		88.8424	0.0513797	3.05138		76.7515	0.114913	4.11491		69.1425	0.160255	5.16025		46.8784	0.329027	5.32903
3083.67	69.665	0.156985	0.156985		89.5646	0.0478634	1.04786		75.9607	0.119411	2.11941		88.7879	0.0516461	3.05165		76.6946	0.115235	4.11523		69.0315	0.160953	5.16095		46.7709	0.330025	5.33002
3085.6	69.7136	0.156682	0.156682		89.569	0.0478425	1.04784		75.9859	0.119267	2.11927		88.7224	0.0519668	3.05197		76.6731	0.115357	4.11536		68.9453	0.161495	5.1615		46.6739	0.330926	5.33093
3087.53	69.7232	0.156623	0.156623		89.5947	0.0477176	1.04772		75.9976	0.1192	2.1192		88.6918	0.0521167	3.05212		76.6766	0.115337	4.11534		68.9292	0.161597	5.1616		46.5873	0.331732	5.33173
3089.45	69.6895	0.156833	0.156833		89.6367	0.047514	1.04751		76.0124	0.119115	2.11912		88.6718	0.0522147	3.05221		76.6755	0.115343	4.11534		69.0054	0.161117	5.16112		46.511	0.332444	5.33244
3091.38	69.641	0.157135	0.157135		89.6644	0.04738	1.04738		76.0422	0.118945	2.11895		88.6841	0.0521544	3.05215		76.6663	0.115396	4.1154		69.1107	0.160455	5.16045		46.438	0.333126	5.33313
3093.31	69.6468	0.157099	0.157099		89.6634	0.0473846	1.04738		76.1262	0.118466	2.11847		88.7134	0.0520109	3.05201		76.6694	0.115378	4.11538		69.1381	0.160282	5.16028		46.3631	0.333828	5.33383
3095.24	69.687	0.156848	0.156848		89.6706	0.0473497	1.04735		76.2938	0.117511	2.11751		88.6895	0.0521276	3.05213		76.6596	0.115433	4.11543		69.1138	0.160435	5.16044		46.2778	0.334627	5.33463
3097.17	69.7021	0.156754	0.156754		89.6954	0.0472298	1.04723		76.4934	0.116376	2.11638		88.6556	0.0522937	3.05229		76.6312	0.115595	4.11559		69.0992	0.160527	5.16053		46.1727	0.335614	5.33561
3099.1	69.6587	0.157025	0.157025		89.6862	0.0472744	1.04727		76.6743	0.11535	2.11535		88.6475	0.0523338	3.05233		76.6186	0.115666	4.11567		69.0887	0.160593	5.16059		46.065	0.336629	5.33663
3101.03	69.5846	0.157487	0.157487		89.6432	0.0474826	1.04748		76.791	0.11469	2.11469		88.723	0.0519637	3.05196		76.6038	0.11575	4.11575		69.0618	0.160762	5.16076		45.9636	0.337586	5.33759
3102.95	69.5319	0.157816	0.157816		89.593	0.0477258	1.04773		76.8567	0.114318	2.11432		88.7693	0.0517371	3.05174		76.5601	0.115998	4.116		69.0162	0.161049	5.16105		45.8526	0.338636	5.33864
3104.88	69.5115	0.157944	0.157944		89.5573	0.0478989	1.0479		76.8484	0.114365	2.11436		88.6837	0.0521564	3.05216		76.5164	0.116245	4.11625		68.9418	0.161517	5.16152		45.7332	0.339768	5.33977
3106.81	69.5097	0.157955	0.157955		89.5219	0.0480709	1.04807		76.8393	0.114417	2.11442		88.6022	0.0525557	3.05256		76.4746	0.116483	4.11648		68.8965	0.161803	5.1618		45.606	0.340978	5.34098
3108.74	69.505	0.157984	0.157984		89.4907	0.0482223	1.04822		76.8781	0.114198	2.1142		88.5557	0.0527835	3.05278		76.4458	0.116646	4.11665		68.9275	0.161608	5.16161		45.4732	0.342244	5.34224
3110.67	69.4931	0.158058	0.158058		89.4456	0.0484412	1.04844		76.9307	0.113901	2.1139		88.4846	0.0531324	3.05313		76.4311	0.11673	4.11673		68.9283	0.161603	5.1616		45.346	0.343461	5.34346
3112.6	69.4984	0.158025	0.158025		89.4102	0.048613	1.04861		76.9677	0.113691	2.11369		88.4429	0.0533372	3.05334		76.4432	0.116661	4.11666		68.8611	0.162026	5.16203		45.2219	0.344651	5.34465
3114.53	69.4634	0.158244	0.158244		89.392	0.0487014	1.0487		76.9654	0.113705	2.1137		88.3764	0.0536638	3.05366		76.4457	0.116647	4.11665		68.8108	0.162344	5.16234		45.0923	0.345897	5.3459
3116.45	69.3872	0.158721	0.158721		89.3847	0.048737	1.04874		76.9697	0.11368	2.11368		88.2525	0.054273	3.05427		76.4348	0.116709	4.11671		68.7767	0.162559	5.16256		44.9442	0.347326	5.34733
3118.38	69.3273	0.159096	0.159096		89.3875	0.048723	1.04872		76.9804	0.11362	2.11362		88.2054	0.0545046	3.0545		76.4393	0.116684	4.11668		68.7227	0.1629	5.1629		44.7832	0.348885	5.34888
3120.31	69.3307	0.159074	0.159074		89.3868	0.0487266	1.04873		77.0124	0.113439	2.11344		88.1695	0.0546814	3.05468		76.4638	0.116544	4.11654		68.6612	0.163289	5.16329		44.6263	0.350409	5.35041
3122.24	69.3141	0.159179	0.159179		89.3749	0.0487846	1.04878		77.0767	0.113077	2.11308		88.0354	0.0553428	3.05534		76.454	0.1166	4.1166		68.6202	0.163548	5.16355		44.4754	0.351881	5.35188
3124.17	69.2763	0.159415	0.159415		89.341	0.0489494	1.04895		77.1444	0.112696	2.1127		87.9455	0.0557866	3.05579		76.4194	0.116796	4.1168		68.6019	0.163664	5.16366		44.3118	0.35348	5.35348
3126.1	69.272	0.159442	0.159442		89.2708	0.0492904	1.04929		77.1668	0.112569	2.11257		87.9527	0.0557506	3.05575		76.4034	0.116887	4.11689		68.6031	0.163656	5.16366		44.1253	0.355312	5.35531
3128.02	69.2392	0.159648	0.159648		89.1982	0.0496438	1.04964		77.127	0.112794	2.11279		87.9291	0.0558673	3.05587		76.3627	0.117119	4.11712		68.5952	0.163707	5.16371		43.9256	0.357282	5.35728
3129.95	69.1816	0.160009	0.160009		89.144	0.049908	1.04991		77.0219	0.113386	2.11339		87.866	0.0561793	3.05618		76.2714	0.117638	4.11764		68.5795	0.163806	5.16381		43.7156	0.359364	5.35936
3131.88	69.127	0.160352	0.160352		89.103	0.0501078	1.05011		76.901	0.114068	2.11407		87.794	0.0565352	3.05654		76.1907	0.118098	4.1181		68.5396	0.164058	5.16406		43.509	0.361421	5.36142
3133.81	69.0552	0.160804	0.160804		89.0731	0.0502532	1.05025		76.8433	0.114394	2.11439		87.7961	0.0565246	3.05652		76.1244	0.118476	4.11848		68.5586	0.163938	5.16394		43.3186	0.363326	5.36333
3135.74	69.0261	0.160987	0.160987		89.1024	0.0501105	1.05011		76.8346	0.114443	2.11444		87.8581	0.0562179	3.05622		76.0496	0.118903	4.1189		68.5262	0.164143	5.16414		43.1369	0.365151	5.36515
3137.67	69.0369	0.160919	0.160919		89.1402	0.0499263	1.04993		76.8613	0.114292	2.11429		87.9479	0.0557743	3.05577		75.9532	0.119454	4.11945		68.3861	0.165032	5.16503		42.9451	0.367087	5.36709
3139.59	69.026	0.160987	0.160987		89.1364	0.0499447	1.04994		76.9323	0.113891	2.11389		87.9876	0.0555787	3.05558		75.8548	0.120017	4.12002		68.2375	0.165977	5.16598		42.7478	0.369086	5.36909
3141.52	68.9675	0.161356	0.161356		89.0926	0.0501582	1.05016		77.0491	0.113232	2.11323		87.878	0.0561198	3.05612		75.7561	0.120582	4.12058		68.0864	0.166939	5.16694		42.5575	0.371024	5.37102
3143.45	68.9094	0.161722	0.161722		89.0366	0.0504316	1.05043		77.1162	0.112854	2.11285		87.7577	0.056715	3.05671		75.662	0.121122	4.12112		67.8849	0.168227	5.16823		42.362	0.373023	5.37302
3145.38	68.867	0.161989	0.161989		88.9931	0.0506438	1.05064		77.0804	0.113056	2.11306		87.7309	0.0568475	3.05685		75.6153	0.12139	4.12139		67.7342	0.169192	5.16919		42.1878	0.374813	5.37481
3147.31	68.8559	0.162059	0.162059		88.9491	0.0508584	1.05086		77.037	0.113301	2.1133		87.6918	0.0570411	3.05704		75.622	0.121352	4.12135		67.6822	0.169525	5.16953		42.043	0.376306	5.37631
3149.24	68.9146	0.161689	0.161689		88.878	0.0512057	1.05121		76.9836	0.113602	2.1136		87.6297	0.0573486	3.05735		75.6775	0.121033	4.12103		67.7357	0.169182	5.16918		41.8835	0.377957	5.37796
3151.17	68.9727	0.161323	0.161323		88.7893	0.0516396	1.05164		76.9102	0.114016	2.11402		87.5844	0.0575731	3.05757		75.7619	0.120549	4.12055		67.8661	0.168347	5.16835		41.6879	0.37999	5.37999
3153.09	68.9845	0.161248	0.161248		88.7285	0.0519368	1.05194		76.7024	0.115191	2.11519		87.4998	0.0579932	3.05799		75.7972	0.120347	4.12035		67.9336	0.167915	5.16792		41.4618	0.382351	5.38235
3155.02	68.9488	0.161473	0.161473		88.6786	0.0521813	1.05218		76.4464	0.116643	2.11664		87.3521	0.0587268	3.05873		75.7727	0.120487	4.12049		67.9799	0.167619	5.16762		41.2436	0.384643	5.38464
3156.95	68.9187	0.161663	0.161663		88.659	0.0522772	1.05228		76.2187	0.117938	2.11794		87.216	0.0594038	3.0594		75.7942	0.120364	4.12036		68.1124	0.166774	5.16677		41.0504	0.386683	5.38668
3158.88	68.925	0.161623	0.161623		88.6945	0.0521035	1.0521		76.0549	0.118873	2.11887		87.1427	0.0597691	3.05977		75.8337	0.120138	4.12014		68.2122	0.166138	5.16614		40.8664	0.388634	5.38863
3160.81	68.9714	0.161331	0.161331		88.7683	0.051742	1.05174		75.9925	0.11923	2.11923		87.1129	0.0599173	3.05992		75.8343	0.120135	4.12013		68.3147	0.165486	5.16549		40.6939	0.39047	5.39047
3162.74	69.049	0.160842	0.160842		88.8305	0.0514379	1.05144		75.9687	0.119365	2.11937		87.1462	0.0597516	3.05975		75.8256	0.120184	4.12018		68.4102	0.164879	5.16488		40.5299	0.392225	5.39222
3164.67	69.0907	0.16058	0.16058		88.8233	0.0514732	1.05147		76.0124	0.119116	2.11912		87.2101	0.059433	3.05943		75.7609	0.120555	4.12055		68.5112	0.164239	5.16424		40.3642	0.394004	5.394
3166.59	69.0841	0.160622	0.160622		88.7806	0.0516819	1.05168		76.1596	0.118276	2.11828		87.1374	0.0597954	3.0598		75.6796	0.121021	4.12102		68.5587	0.163938	5.16394		40.2179	0.395581	5.39558
3168.52	69.0768	0.160668	0.160668		88.7622	0.0517718	1.05177		76.3477	0.117204	2.1172		86.9748	0.0606065	3.06061		75.6276	0.12132	4.12132		68.4597	0.164565	5.16456		40.0658	0.397227	5.39723
3170.45	69.1076	0.160475	0.160475		88.7482	0.0518403	1.05184		76.4557	0.11659	2.11659		86.9326	0.0608174	3.06082		75.5548	0.121738	4.12174		68.2769	0.165726	5.16573		39.8954	0.399077	5.39908
3172.38	69.1116	0.160449	0.160449		88.736	0.0519004	1.0519		76.4861	0.116418	2.11642		86.995	0.0605056	3.06051		75.4947	0.122084	4.12208		68.1158	0.166752	5.16675		39.7361	0.400815	5.40081
3174.31	69.1145	0.160431	0.160431		88.7347	0.0519067	1.05191		76.518	0.116237	2.11624		87.0459	0.0602516	3.06025		75.4545	0.122315	4.12232		67.9781	0.167631	5.16763		39.5706	0.402628	5.40263
3176.24	69.1723	0.160068	0.160068		88.6885	0.0521328	1.05213		76.4887	0.116403	2.1164		86.9969	0.0604961	3.0605		75.4388	0.122405	4.12241		67.8688	0.16833	5.16833		39.3649	0.40489	5.40489
3178.16	69.1433	0.16025	0.16025		88.6491	0.0523259	1.05233		76.4014	0.116898	2.1169		86.8533	0.0612135	3.06121		75.3883	0.122696	4.1227		67.7536	0.169067	5.16907		39.1435	0.407341	5.40734
3180.09	69.0349	0.160931	0.160931		88.6633	0.0522564	1.05226		76.3333	0.117286	2.11729		86.7253	0.0618541	3.06185		75.2511	0.123487	4.12349		67.5803	0.17018	5.17018		38.942	0.409581	5.40958
3182.02	68.9196	0.161657	0.161657		88.6546	0.0522986	1.0523		76.3315	0.117296	2.1173		86.6178	0.062393	3.06239		75.1044	0.124334	4.12433		67.4855	0.170789	5.17079		38.7713	0.411489	5.41149
3183.95	68.7982	0.162423	0.162423		88.6422	0.0523593	1.05236		76.2794	0.117593	2.11759		86.5114	0.0629267	3.06293		75.0434	0.124687	4.12469		67.4591	0.17096	5.17096		38.6225	0.41316	5.41316
3185.88	68.7036	0.16302	0.16302		88.6225	0.0524562	1.05246		76.1851	0.11813	2.11813		86.4004	0.063484	3.06348		74.9716	0.125103	4.1251		67.3449	0.171695	5.1717		38.4743	0.414829	5.41483
3187.81	68.6706	0.163229	0.163229		88.5578	0.0527733	1.05277		76.1113	0.118551	2.11855		86.2553	0.0642142	3.06421		74.8895	0.125579	4.12558		67.3236	0.171832	5.17183		38.3361	0.416392	5.41639
3189.74	68.6784	0.16318	0.16318		88.453	0.0532873	1.05329		75.9824	0.119287	2.11929		86.1675	0.0646565	3.06466		74.8341	0.125901	4.1259		67.3853	0.171435	5.17143		38.2174	0.417739	5.41774
3191.66	68.7234	0.162895	0.162895		88.3488	0.0537994	1.0538		75.844	0.120079	2.12008		86.0864	0.0650657	3.06507		74.7574	0.126346	4.12635		67.3919	0.171392	5.17139		38.1031	0.41904	5.41904
3193.59	68.7825	0.162522	0.162522		88.2941	0.0540685	1.05407		75.7726	0.120488	2.12049		85.998	0.0655119	3.06551		74.7234	0.126543	4.12654		67.3625	0.171582	5.17158		37.987	0.420366	5.42037
3195.52	68.8351	0.16219	0.16219		88.2755	0.0541596	1.05416		75.7335	0.120712	2.12071		85.9734	0.0656358	3.06564		74.7434	0.126427	4.12643		67.3862	0.171429	5.17143		37.848	0.421957	5.42196
3197.45	68.9175	0.16167	0.16167		88.2571	0.0542505	1.05425		75.6417	0.121239	2.12124		86.0033	0.065485	3.06549		74.724	0.12654	4.12654		67.4255	0.171176	5.17118		37.7026	0.423628	5.42363
3199.38	68.9704	0.161338	0.161338		88.224	0.0544132	1.05441		75.5422	0.121811	2.12181		86.0033	0.0654848	3.06548		74.7185	0.126572	4.12657		67.458	0.170966	5.17097		37.5744	0.425108	5.42511
3201.31	68.9853	0.161243	0.161243		88.2155	0.0544552	1.05446		75.4642	0.122259	2.12226		85.9342	0.0658341	3.06583		74.7624	0.126317	4.12632		67.4728	0.170871	5.17087		37.4536	0.426507	5.42651
3203.24	69.0302	0.160961	0.160961		88.2146	0.0544596	1.05446		75.3638	0.122837	2.12284		85.8194	0.0664146	3.06641		74.8006	0.126095	4.12609		67.4294	0.171151	5.17115		37.3376	0.427853	5.42785
3205.16	69.05	0.160836	0.160836		88.2683	0.0541953	1.0542		75.3123	0.123134	2.12313		85.7972	0.0665267	3.06653		74.8052	0.126068	4.12607		67.3507	0.171658	5.17166		37.2369	0.429026	5.42903
3207.09	69.0027	0.161134	0.161134		88.3315	0.0538843	1.05388		75.3531	0.122899	2.1229		85.8522	0.0662486	3.06625		74.7889	0.126163	4.12616		67.3157	0.171884	5.17188		37.1461	0.430087	5.43009
3209.02	68.9431	0.161509	0.161509		88.3645	0.053722	1.05372		75.3982	0.122639	2.12264		85.8533	0.0662433	3.06624		74.7777	0.126228	4.12623		67.3403	0.171725	5.17173		37.0758	0.43091	5.43091
3210.95	68.9007	0.161776	0.161776		88.4072	0.0535125	1.05351		75.3845	0.122718	2.12272		85.795	0.0665379	3.06654		74.7859	0.12618	4.12618		67.3657	0.171561	5.17156		37.0231	0.431527	5.43153
3212.88	68.917	0.161674	0.161674		88.4474	0.0533151	1.05332		75.4018	0.122618	2.12262		85.7297	0.0668688	3.06687		74.8012	0.126091	4.12609		67.3097	0.171923	5.17192		36.9587	0.432283	5.43228
3214.81	68.9238	0.161631	0.161631		88.4439	0.0533322	1.05333		75.4561	0.122306	2.12231		85.686	0.0670899	3.06709		74.8223	0.125969	4.12597		67.2887	0.172058	5.17206		36.8854	0.433146	5.43315
3216.74	68.9188	0.161662	0.161662		88.4155	0.0534718	1.05347		75.4635	0.122263	2.12226		85.6698	0.0671724	3.06717		74.8609	0.125745	4.12575		67.3018	0.171973	5.17197		36.8102	0.434032	5.43403
3218.66	68.9361	0.161553	0.161553		88.4004	0.0535459	1.05355		75.4409	0.122393	2.12239		85.587	0.0675923	3.06759		74.8898	0.125578	4.12558		67.3197	0.171858	5.17186		36.7342	0.434929	5.43493
3220.59	68.908	0.16173	0.16173		88.4375	0.0533634	1.05336		75.3663	0.122823	2.12282		85.5285	0.0678893	3.06789		74.897	0.125535	4.12554		67.3993	0.171344	5.17134		36.643	0.436009	5.43601
3222.52	68.8273	0.162239	0.162239		88.4671	0.0532185	1.05322		75.2457	0.123519	2.12352		85.4928	0.0680706	3.06807		74.9043	0.125493	4.12549		67.5216	0.170557	5.17056		36.5317	0.43733	5.43733
3224.45	68.7523	0.162713	0.162713		88.4654	0.0532266	1.05323		75.1381	0.12414	2.12414		85.4333	0.068373	3.06837		74.8986	0.125526	4.12553		67.6303	0.169859	5.16986		36.4192	0.438669	5.43867
3226.38	68.6599	0.163297	0.163297		88.4541	0.0532818	1.05328		75.0794	0.124479	2.12448		85.3967	0.0685589	3.06856		74.9125	0.125446	4.12545		67.7108	0.169342	5.16934		36.3229	0.439819	5.43982
3228.31	68.5576	0.163944	0.163944		88.4416	0.0533434	1.05334		74.9853	0.125024	2.12502		85.4176	0.0684528	3.06845		74.9271	0.125361	4.12536		67.7409	0.169149	5.16915		36.2433	0.440773	5.44077
3230.24	68.5182	0.164194	0.164194		88.4301	0.0534	1.0534		74.8711	0.125686	2.12569		85.4881	0.0680941	3.06809		74.9156	0.125428	4.12543		67.6964	0.169434	5.16943		36.1735	0.44161	5.44161
3232.16	68.5019	0.164297	0.164297		88.426	0.0534198	1.05342		74.8128	0.126024	2.12602		85.6034	0.0675092	3.06751		74.9074	0.125475	4.12548		67.705	0.16938	5.16938		36.1089	0.442386	5.44239
3234.09	68.5244	0.164155	0.164155		88.3893	0.0536003	1.0536		74.7655	0.126299	2.1263		85.6395	0.0673257	3.06733		74.8901	0.125576	4.12558		67.7511	0.169083	5.16908		36.035	0.443276	5.44328
3236.02	68.6318	0.163475	0.163475		88.3565	0.0537613	1.05376		74.7098	0.126622	2.12662		85.6232	0.0674083	3.06741		74.8495	0.125811	4.12581		67.8338	0.168554	5.16855		35.9721	0.444035	5.44403
3237.95	68.7428	0.162773	0.162773		88.3524	0.0537817	1.05378		74.6841	0.126772	2.12677		85.5884	0.0675851	3.06759		74.7924	0.126143	4.12614		67.8998	0.168131	5.16813		35.9061	0.444831	5.44483
3239.88	68.8414	0.16215	0.16215		88.3886	0.0536036	1.0536		74.7359	0.126471	2.12647		85.548	0.0677901	3.06779		74.7647	0.126304	4.1263		67.8038	0.168746	5.16875		35.8208	0.445865	5.44587
3241.81	68.8727	0.161953	0.161953		88.3755	0.053668	1.05367		74.8026	0.126083	2.12608		85.4357	0.0683606	3.06836		74.7676	0.126287	4.12629		67.7041	0.169385	5.16939		35.739	0.446857	5.44686
3243.73	68.8912	0.161836	0.161836		88.3437	0.0538244	1.05382		74.7592	0.126335	2.12634		85.2733	0.0691868	3.06919		74.7723	0.126259	4.12626		67.6556	0.169697	5.1697		35.6725	0.447666	5.44767
3245.66	68.9098	0.161719	0.161719		88.3696	0.0536971	1.0537		74.6369	0.127046	2.12705		85.1115	0.0700119	3.07001		74.7531	0.126371	4.12637		67.5659	0.170273	5.17027		35.6139	0.448381	5.44838
3247.59	68.8626	0.162017	0.162017		88.4372	0.0533652	1.05337		74.4607	0.128073	2.12807		84.9663	0.0707535	3.07075		74.7232	0.126544	4.12654		67.4055	0.171305	5.1713		35.5363	0.449327	5.44933
3249.52	68.7967	0.162433	0.162433		88.4683	0.0532123	1.05321		74.3176	0.128908	2.12891		84.8214	0.0714944	3.07149		74.6995	0.126682	4.12668		67.2237	0.172478	5.17248		35.4511	0.45037	5.45037
3251.45	68.7662	0.162625	0.162625		88.4845	0.0531329	1.05313		74.2709	0.129181	2.12918		84.6975	0.0721293	3.07213		74.6747	0.126826	4.12683		67.1194	0.173152	5.17315		35.3974	0.451029	5.45103
3253.38	68.7387	0.162798	0.162798		88.512	0.052998	1.053		74.2497	0.129306	2.12931		84.5989	0.0726351	3.07264		74.6612	0.126905	4.12691		67.1025	0.173261	5.17326		35.3743	0.451313	5.45131
3255.3	68.707	0.162999	0.162999		88.5118	0.0529987	1.053		74.1261	0.130029	2.13003		84.5013	0.0731366	3.07314		74.6539	0.126948	4.12695		67.1064	0.173236	5.17324		35.3572	0.451522	5.45152
3257.23	68.6978	0.163057	0.163057		88.4732	0.0531884	1.05319		74.0072	0.130726	2.13073		84.4258	0.0735247	3.07352		74.6426	0.127013	4.12701		67.102	0.173265	5.17326		35.3388	0.451748	5.45175
3259.16	68.7151	0.162948	0.162948		88.3897	0.0535981	1.0536		73.9085	0.131306	2.13131		84.3163	0.0740885	3.07409		74.612	0.127191	4.12719		67.134	0.173057	5.17306		35.3119	0.452079	5.45208
3261.09	68.754	0.162702	0.162702		88.2779	0.0541481	1.05415		73.7521	0.132226	2.13223		84.2	0.074688	3.07469		74.5638	0.127472	4.12747		67.1449	0.172987	5.17299		35.2563	0.452763	5.45276
3263.02	68.7836	0.162515	0.162515		88.1983	0.0545397	1.05454		73.5837	0.133218	2.13322		84.1512	0.0749399	3.07494		74.5014	0.127835	4.12784		67.2458	0.172335	5.17234		35.1927	0.453548	5.45355
3264.95	68.7432	0.16277	0.16277		88.1167	0.0549416	1.05494		73.5067	0.133673	2.13367		84.0859	0.075277	3.07528		74.4477	0.128148	4.12815		67.3775	0.171485	5.17148		35.1228	0.45441	5.45441
3266.88	68.6816	0.16316	0.16316		88.0356	0.0553417	1.05534		73.4925	0.133757	2.13376		83.9823	0.0758122	3.07581		74.4094	0.128372	4.12837		67.3945	0.171375	5.17138		35.0607	0.455179	5.45518
3268.8	68.5896	0.163742	0.163742		87.9185	0.05592	1.05592		73.4232	0.134167	2.13417		83.8797	0.0763433	3.07634		74.3448	0.128749	4.12875		67.3735	0.171511	5.17151		35.0294	0.455567	5.45557
3270.73	68.4891	0.164378	0.164378		87.8242	0.0563859	1.05639		73.2895	0.134958	2.13496		83.8399	0.0765492	3.07655		74.2796	0.12913	4.12913		67.3488	0.17167	5.17167		35.032	0.455536	5.45554
3272.66	68.4014	0.164935	0.164935		87.8019	0.0564959	1.0565		73.1819	0.135596	2.1356		83.8635	0.0764272	3.07643		74.2215	0.12947	4.12947		67.2292	0.172442	5.17244		35.038	0.455461	5.45546
3274.59	68.3738	0.16511	0.16511		87.8123	0.0564446	1.05644		73.0948	0.136114	2.13611		83.8315	0.0765927	3.07659		74.1746	0.129745	4.12974		67.0723	0.173457	5.17346		35.0467	0.455353	5.45535
3276.52	68.4479	0.16464	0.16464		87.8188	0.0564123	1.05641		73.0566	0.136341	2.13634		83.7689	0.0769174	3.07692		74.1626	0.129815	4.12982		66.9772	0.174073	5.17407		35.0875	0.454848	5.45485
3278.45	68.534	0.164094	0.164094		87.8575	0.056221	1.05622		73.061	0.136314	2.13631		83.7351	0.0770925	3.07709		74.1921	0.129642	4.12964		66.9592	0.174189	5.17419		35.1658	0.45388	5.45388
3280.38	68.584	0.163777	0.163777		87.9009	0.0560067	1.05601		72.9854	0.136764	2.13676		83.6797	0.07738	3.07738		74.2449	0.129334	4.12933		66.928	0.174392	5.17439		35.2485	0.452859	5.45286
3282.3	68.616	0.163575	0.163575		87.9425	0.0558011	1.0558		72.8362	0.137653	2.13765		83.6129	0.0777265	3.07773		74.2779	0.12914	4.12914		66.8382	0.174975	5.17498		35.3258	0.451908	5.45191
3284.23	68.6454	0.163388	0.163388		87.9475	0.0557766	1.05578		72.7639	0.138084	2.13808		83.5679	0.0779605	3.07796		74.26	0.129245	4.12925		66.7036	0.17585	5.17585		35.408	0.450899	5.4509
3286.16	68.6856	0.163134	0.163134		87.9226	0.0558996	1.0559		72.736	0.138251	2.13825		83.5001	0.0783128	3.07831		74.2074	0.129553	4.12955		66.5498	0.176853	5.17685		35.4769	0.450055	5.45005
3288.09	68.7023	0.163029	0.163029		87.9207	0.0559088	1.05591		72.7054	0.138434	2.13843		83.4975	0.0783267	3.07833		74.1579	0.129842	4.12984		66.4164	0.177725	5.17772		35.5254	0.449461	5.44946
3290.02	68.7181	0.162929	0.162929		87.9164	0.0559303	1.05593		72.7036	0.138444	2.13844		83.5123	0.0782493	3.07825		74.1145	0.130097	4.1301		66.3873	0.177915	5.17792		35.5875	0.448702	5.4487
3291.95	68.6992	0.163048	0.163048		87.888	0.0560703	1.05607		72.746	0.138191	2.13819		83.4389	0.0786316	3.07863		74.0966	0.130201	4.1302		66.4395	0.177574	5.17757		35.6616	0.447799	5.4478
3293.88	68.6038	0.163652	0.163652		87.8699	0.0561599	1.05616		72.7883	0.137938	2.13794		83.3897	0.0788875	3.07889		74.1006	0.130179	4.13018		66.4715	0.177365	5.17736		35.7415	0.446827	5.44683
3295.8	68.4678	0.164514	0.164514		87.8588	0.0562145	1.05621		72.7996	0.137871	2.13787		83.4078	0.0787933	3.07879		74.1023	0.130168	4.13017		66.4795	0.177312	5.17731		35.8509	0.4455	5.4455
3297.73	68.3791	0.165076	0.165076		87.8508	0.0562542	1.05625		72.8333	0.13767	2.13767		83.4001	0.0788335	3.07883		74.1262	0.130028	4.13003		66.4958	0.177206	5.17721		35.9825	0.443908	5.44391
3299.66	68.3782	0.165082	0.165082		87.8501	0.0562575	1.05626		72.8717	0.137441	2.13744		83.4135	0.0787634	3.07876		74.1504	0.129886	4.12989		66.468	0.177387	5.17739		36.1012	0.442478	5.44248
3301.59	68.4538	0.164603	0.164603		87.885	0.0560854	1.05609		72.8577	0.137525	2.13752		83.4368	0.0786422	3.07864		74.1834	0.129693	4.12969		66.4907	0.177239	5.17724		36.2231	0.441015	5.44101
3303.52	68.5618	0.163918	0.163918		87.9525	0.055752	1.05575		72.869	0.137457	2.13746		83.4857	0.0783878	3.07839		74.2484	0.129313	4.12931		66.5822	0.176642	5.17664		36.358	0.4394	5.4394
3305.45	68.5757	0.16383	0.16383		88.0306	0.0553665	1.05537		72.9491	0.13698	2.13698		83.5931	0.0778295	3.07783		74.3053	0.12898	4.12898		66.6428	0.176246	5.17625		36.4952	0.437764	5.43776
3307.38	68.5406	0.164052	0.164052		88.081	0.0551176	1.05512		73.0443	0.136414	2.13641		83.7375	0.07708	3.07708		74.3304	0.128833	4.12883		66.6335	0.176307	5.17631		36.628	0.436187	5.43619
3309.3	68.5794	0.163806	0.163806		88.1469	0.0547928	1.05479		73.1564	0.135748	2.13575		83.9262	0.0761022	3.0761		74.3513	0.128711	4.12871		66.6611	0.176127	5.17613		36.7528	0.434709	5.43471
3311.23	68.6488	0.163367	0.163367		88.1863	0.0545987	1.0546		73.2713	0.135066	2.13507		84.1413	0.0749907	3.07499		74.3375	0.128792	4.12879		66.7361	0.175639	5.17564		36.8802	0.433207	5.43321
3313.16	68.6958	0.163069	0.163069		88.2093	0.0544855	1.05449		73.3981	0.134315	2.13432		84.3438	0.073947	3.07395		74.29	0.12907	4.12907		66.7878	0.175303	5.1753		37.0155	0.431616	5.43162
3315.09	68.7538	0.162703	0.162703		88.2471	0.0542995	1.0543		73.5181	0.133606	2.13361		84.5039	0.0731233	3.07312		74.2382	0.129373	4.12937		66.8367	0.174985	5.17499		37.1558	0.429973	5.42997
3317.02	68.8019	0.1624	0.1624		88.232	0.0543738	1.05437		73.5749	0.13327	2.13327		84.603	0.0726144	3.07261		74.2157	0.129504	4.1295		66.9383	0.174325	5.17433		37.301	0.42828	5.42828
3318.95	68.7754	0.162567	0.162567		88.2008	0.0545276	1.05453		73.63	0.132945	2.13294		84.6324	0.0724636	3.07246		74.2096	0.12954	4.12954		67.1133	0.173192	5.17319		37.4412	0.42665	5.42665
3320.87	68.7085	0.162989	0.162989		88.1646	0.0547059	1.05471		73.6876	0.132605	2.13261		84.6493	0.0723766	3.07238		74.2068	0.129556	4.12956		67.2073	0.172584	5.17258		37.5801	0.425042	5.42504
3322.8	68.6648	0.163266	0.163266		88.1137	0.0549564	1.05496		73.7192	0.132419	2.13242		84.6348	0.0724512	3.07245		74.1941	0.129631	4.12963		67.1662	0.172849	5.17285		37.7297	0.423316	5.42332
3324.73	68.6515	0.16335	0.16335		88.0536	0.055253	1.05525		73.716	0.132438	2.13244		84.551	0.0728814	3.07288		74.1792	0.129718	4.12972		67.0812	0.173399	5.1734		37.8783	0.421609	5.42161
3326.66	68.6475	0.163375	0.163375		87.9858	0.0555873	1.05559		73.6777	0.132664	2.13266		84.493	0.0731792	3.07318		74.1737	0.12975	4.12975		66.936	0.17434	5.17434		38.0258	0.419922	5.41992
3328.59	68.6357	0.16345	0.16345		87.942	0.0558039	1.0558		73.6438	0.132864	2.13286		84.509	0.073097	3.0731		74.1537	0.129867	4.12987		66.7875	0.175305	5.1753		38.1745	0.418226	5.41823
3330.52	68.5945	0.163711	0.163711		87.9369	0.0558289	1.05583		73.6472	0.132844	2.13284		84.5313	0.0729826	3.07298		74.1268	0.130025	4.13002		66.6844	0.175975	5.17598		38.3389	0.41636	5.41636
3332.45	68.5314	0.164111	0.164111		87.9641	0.0556944	1.05569		73.6757	0.132676	2.13268		84.5711	0.0727782	3.07278		74.1215	0.130056	4.13006		66.5882	0.176603	5.1766		38.5206	0.414307	5.41431
3334.37	68.5126	0.164229	0.164229		88.0065	0.0554853	1.05549		73.6951	0.132562	2.13256		84.6553	0.0723457	3.07235		74.1429	0.12993	4.12993		66.4581	0.177452	5.17745		38.6882	0.412422	5.41242
3336.3	68.5505	0.163989	0.163989		88.0393	0.0553233	1.05532		73.7066	0.132494	2.13249		84.7734	0.0717404	3.07174		74.1918	0.129644	4.12964		66.4111	0.177759	5.17776		38.8258	0.41088	5.41088
3338.23	68.5333	0.164098	0.164098		88.0303	0.0553679	1.05537		73.7569	0.132197	2.1322		84.9159	0.071011	3.07101		74.2111	0.129531	4.12953		66.4847	0.177279	5.17728		38.9679	0.409293	5.40929
3340.16	68.5166	0.164204	0.164204		88.0261	0.0553887	1.05539		73.823	0.131808	2.13181		85.0165	0.0704969	3.0705		74.1877	0.129668	4.12967		66.5514	0.176843	5.17684		39.1238	0.407559	5.40756
3342.09	68.5758	0.163829	0.163829		88.0247	0.0553954	1.0554		73.8296	0.131769	2.13177		85.083	0.0701571	3.07016		74.157	0.129848	4.12985		66.6053	0.176491	5.17649		39.2764	0.405869	5.40587
3344.02	68.6443	0.163396	0.163396		87.9663	0.0556838	1.05568		73.8304	0.131765	2.13176		85.1665	0.0697312	3.06973		74.1702	0.12977	4.12977		66.6868	0.17596	5.17596		39.4228	0.404253	5.40425
3345.95	68.6716	0.163223	0.163223		87.883	0.0560951	1.0561		73.9271	0.131196	2.1312		85.2373	0.0693705	3.06937		74.2172	0.129495	4.1295		66.7828	0.175335	5.17534		39.566	0.402678	5.40268
3347.87	68.6593	0.163301	0.163301		87.8516	0.0562505	1.05625		74.0175	0.130665	2.13067		85.2661	0.0692235	3.06922		74.2621	0.129233	4.12923		66.8166	0.175115	5.17512		39.7132	0.401065	5.40107
3349.8	68.6499	0.16336	0.16336		87.8651	0.0561838	1.05618		74.081	0.130293	2.13029		85.2773	0.0691664	3.06917		74.2668	0.129205	4.12921		66.8331	0.175008	5.17501		39.8649	0.39941	5.39941
3351.73	68.6492	0.163364	0.163364		87.8614	0.0562018	1.0562		74.1513	0.129881	2.12988		85.2773	0.0691666	3.06917		74.2753	0.129156	4.12916		66.8954	0.174603	5.1746		40.0321	0.397592	5.39759
3353.66	68.6396	0.163425	0.163425		87.8262	0.0563759	1.05638		74.2436	0.129341	2.12934		85.317	0.0689642	3.06896		74.3053	0.12898	4.12898		66.9065	0.174532	5.17453		40.2056	0.395714	5.39571
3355.59	68.659	0.163302	0.163302		87.8047	0.0564823	1.05648		74.3479	0.128731	2.12873		85.3517	0.0687881	3.06879		74.3222	0.128881	4.12888		66.9257	0.174407	5.17441		40.3889	0.393738	5.39374
3357.52	68.6303	0.163484	0.163484		87.8106	0.0564531	1.05645		74.3924	0.128472	2.12847		85.322	0.0689389	3.06894		74.3546	0.128692	4.12869		66.9989	0.173932	5.17393		40.5991	0.391483	5.39148
3359.44	68.555	0.163961	0.163961		87.8522	0.0562472	1.05625		74.4169	0.128328	2.12833		85.3673	0.0687085	3.06871		74.4163	0.128332	4.12833		67.0433	0.173645	5.17364		40.8091	0.389243	5.38924
3361.37	68.4473	0.164644	0.164644		87.8901	0.05606	1.05606		74.4918	0.127891	2.12789		85.4484	0.068296	3.0683		74.4652	0.128046	4.12805		67.0355	0.173695	5.1737		40.9928	0.387293	5.38729
3363.3	68.3636	0.165175	0.165175		87.8832	0.0560941	1.05609		74.5896	0.127322	2.12732		85.5061	0.0680031	3.068		74.4874	0.127917	4.12792		67.0684	0.173482	5.17348		41.1641	0.385481	5.38548
3365.23	68.3409	0.165319	0.165319		87.8718	0.0561503	1.05615		74.6978	0.126692	2.12669		85.5865	0.0675949	3.06759		74.4821	0.127948	4.12795		67.1174	0.173165	5.17316		41.3499	0.383525	5.38353
3367.16	68.3702	0.165133	0.165133		87.8837	0.0560918	1.05609		74.7942	0.126132	2.12613		85.6762	0.0671397	3.06714		74.4798	0.127961	4.12796		67.1389	0.173026	5.17303		41.5402	0.381532	5.38153
3369.09	68.3868	0.165028	0.165028		87.8722	0.0561485	1.05615		74.8414	0.125858	2.12586		85.7502	0.0667647	3.06676		74.5185	0.127736	4.12774		67.1162	0.173173	5.17317		41.7248	0.379605	5.37961
3371.01	68.4109	0.164875	0.164875		87.8543	0.056237	1.05624		74.8872	0.125592	2.12559		85.7709	0.0666601	3.06666		74.6023	0.127248	4.12725		67.0722	0.173457	5.17346		41.9081	0.377702	5.3777
3372.94	68.4326	0.164737	0.164737		87.8963	0.0560293	1.05603		74.9527	0.125213	2.12521		85.7545	0.0667432	3.06674		74.7268	0.126524	4.12652		67.0441	0.173639	5.17364		42.0695	0.376033	5.37603
3374.87	68.453	0.164608	0.164608		88.0166	0.0554355	1.05544		74.9781	0.125066	2.12507		85.7289	0.0668726	3.06687		74.8191	0.125988	4.12599		67.0271	0.17375	5.17375		42.2298	0.374381	5.37438
3376.8	68.5183	0.164193	0.164193		88.1179	0.0549357	1.05494		75.0129	0.124864	2.12486		85.7111	0.066963	3.06696		74.8295	0.125927	4.12593		67.0201	0.173795	5.1738		42.3962	0.372673	5.37267
3378.73	68.5833	0.163782	0.163782		88.1546	0.0547553	1.05476		75.0483	0.124659	2.12466		85.768	0.0666745	3.06667		74.8571	0.125767	4.12577		66.972	0.174107	5.17411		42.5716	0.37088	5.37088
3380.66	68.6109	0.163607	0.163607		88.1881	0.0545901	1.05459		75.0394	0.12471	2.12471		85.8277	0.0663726	3.06637		74.905	0.125489	4.12549		66.8655	0.174798	5.1748		42.767	0.368891	5.36889
3382.59	68.6431	0.163403	0.163403		88.2145	0.0544599	1.05446		75.0601	0.124591	2.12459		85.8208	0.0664075	3.06641		74.9395	0.125289	4.12529		66.8095	0.175162	5.17516		42.9817	0.366716	5.36672
3384.51	68.5926	0.163723	0.163723		88.2208	0.0544289	1.05443		75.0916	0.124408	2.12441		85.8661	0.0661784	3.06618		74.99	0.124997	4.125		66.8014	0.175214	5.17521		43.1946	0.364571	5.36457
3386.44	68.5088	0.164254	0.164254		88.2478	0.0542961	1.0543		75.0969	0.124378	2.12438		85.9908	0.065548	3.06555		75.0367	0.124726	4.12473		66.7546	0.175519	5.17552		43.3899	0.362611	5.36261
3388.37	68.4707	0.164495	0.164495		88.2542	0.0542647	1.05426		75.1036	0.124339	2.12434		86.0561	0.0652184	3.06522		75.0542	0.124625	4.12462		66.7436	0.17559	5.17559		43.5817	0.360695	5.3607
3390.3	68.5192	0.164188	0.164188		88.2369	0.0543495	1.05435		75.1333	0.124167	2.12417		86.0944	0.0650253	3.06503		75.0184	0.124832	4.12483		66.8246	0.175064	5.17506		43.7946	0.358579	5.35858
3392.23	68.5881	0.163751	0.163751		88.223	0.0544183	1.05442		75.2205	0.123664	2.12366		86.1551	0.0647192	3.06472		74.9695	0.125116	4.12512		66.9	0.174574	5.17457		44.0093	0.356455	5.35646
3394.16	68.5835	0.16378	0.16378		88.2119	0.0544728	1.05447		75.3035	0.123185	2.12318		86.1135	0.0649287	3.06493		74.9345	0.125318	4.12532		66.9697	0.174121	5.17412		44.2078	0.354501	5.3545
3396.09	68.5463	0.164016	0.164016		88.2037	0.0545132	1.05451		75.3229	0.123073	2.12307		86.0051	0.0654758	3.06548		74.892	0.125564	4.12556		67.0283	0.173742	5.17374		44.4027	0.35259	5.35259
3398.01	68.5743	0.163838	0.163838		88.2136	0.0544646	1.05446		75.3098	0.123148	2.12315		85.9545	0.0657313	3.06573		74.8759	0.125658	4.12566		67.0571	0.173555	5.17356		44.6009	0.350656	5.35066
3399.94	68.6254	0.163515	0.163515		88.2498	0.0542863	1.05429		75.3312	0.123025	2.12303		85.962	0.0656933	3.06569		74.8913	0.125569	4.12557		67.0715	0.173462	5.17346		44.7953	0.348767	5.34877
3401.87	68.6529	0.163341	0.163341		88.2914	0.0540814	1.05408		75.3549	0.122888	2.12289		86.0121	0.0654404	3.06544		74.8823	0.125621	4.12562		67.0809	0.173401	5.1734		45.0102	0.346689	5.34669
3403.8	68.6097	0.163615	0.163615		88.3244	0.0539193	1.05392		75.3609	0.122854	2.12285		86.1055	0.0649694	3.06497		74.8659	0.125716	4.12572		67.103	0.173258	5.17326		45.2489	0.344392	5.34439
3405.73	68.5043	0.164282	0.164282		88.3469	0.0538089	1.05381		75.3625	0.122845	2.12284		86.2264	0.0643599	3.06436		74.9033	0.125499	4.1255		67.0855	0.173371	5.17337		45.5041	0.341949	5.34195
3407.66	68.3843	0.165044	0.165044		88.3484	0.0538014	1.0538		75.3874	0.122701	2.1227		86.3078	0.06395	3.06395		74.9507	0.125224	4.12522		67.0894	0.173346	5.17335		45.7785	0.339338	5.33934
3409.59	68.3052	0.165546	0.165546		88.332	0.053882	1.05388		75.4271	0.122473	2.12247		86.358	0.0636977	3.0637		74.994	0.124974	4.12497		67.1582	0.172901	5.1729		46.043	0.336836	5.33684
3411.51	68.2664	0.165793	0.165793		88.3021	0.0540292	1.05403		75.4558	0.122307	2.12231		86.3654	0.0636603	3.06366		75.058	0.124603	4.1246		67.1778	0.172774	5.17277		46.282	0.334588	5.33459
3413.44	68.2856	0.165671	0.165671		88.2406	0.0543314	1.05433		75.4625	0.122269	2.12227		86.3462	0.0637567	3.06376		75.1171	0.124261	4.12426		67.1677	0.172839	5.17284		46.5055	0.332496	5.3325
3415.37	68.3649	0.165167	0.165167		88.1834	0.054613	1.05461		75.5355	0.121849	2.12185		86.3399	0.0637885	3.06379		75.1504	0.124069	4.12407		67.2256	0.172465	5.17247		46.7152	0.330542	5.33054
3417.3	68.4845	0.164408	0.164408		88.2063	0.0545006	1.0545		75.6149	0.121392	2.12139		86.304	0.063969	3.06397		75.1657	0.12398	4.12398		67.282	0.172101	5.1721		46.9346	0.328507	5.32851
3419.23	68.5682	0.163878	0.163878		88.2282	0.0543928	1.05439		75.6158	0.121388	2.12139		86.2702	0.0641394	3.06414		75.1874	0.123855	4.12386		67.2385	0.172382	5.17238		47.1465	0.326551	5.32655
3421.16	68.5999	0.163677	0.163677		88.2356	0.0543564	1.05436		75.5994	0.121482	2.12148		86.253	0.0642257	3.06423		75.1858	0.123864	4.12386		67.1236	0.173125	5.17312		47.3519	0.324662	5.32466
3423.09	68.6188	0.163557	0.163557		88.2404	0.0543325	1.05433		75.597	0.121495	2.1215		86.3107	0.0639356	3.06394		75.1578	0.124026	4.12403		67.0365	0.173689	5.17369		47.5528	0.322824	5.32282
3425.01	68.632	0.163473	0.163473		88.2491	0.0542898	1.05429		75.5934	0.121516	2.12152		86.4149	0.0634112	3.06341		75.1325	0.124172	4.12417		66.9269	0.1744	5.1744		47.7687	0.320857	5.32086
3426.94	68.6307	0.163482	0.163482		88.2823	0.0541266	1.05413		75.5838	0.121571	2.12157		86.4811	0.0630786	3.06308		75.1188	0.124252	4.12425		66.8544	0.17487	5.17487		48.0141	0.318631	5.31863
3428.87	68.5652	0.163897	0.163897		88.3219	0.0539317	1.05393		75.4974	0.122068	2.12207		86.5686	0.0626398	3.06264		75.1422	0.124116	4.12412		66.8408	0.174958	5.17496		48.2975	0.316075	5.31608
3430.8	68.4559	0.164589	0.164589		88.3987	0.0535542	1.05355		75.4118	0.122561	2.12256		86.6667	0.0621479	3.06215		75.208	0.123736	4.12374		66.7729	0.175399	5.1754		48.5872	0.313478	5.31348
3432.73	68.3625	0.165182	0.165182		88.4574	0.0532659	1.05327		75.408	0.122583	2.12258		86.806	0.0614503	3.06145		75.3091	0.123153	4.12315		66.7926	0.175272	5.17527		48.8869	0.310807	5.31081
3434.66	68.3062	0.16554	0.16554		88.4359	0.0533716	1.05337		75.3857	0.122711	2.12271		86.9126	0.0609171	3.06092		75.3731	0.122784	4.12278		66.9965	0.173948	5.17395		49.2049	0.307991	5.30799
3436.58	68.3278	0.165402	0.165402		88.4011	0.0535425	1.05354		75.3261	0.123055	2.12305		86.9048	0.060956	3.06096		75.3707	0.122797	4.1228		67.1884	0.172706	5.17271		49.4894	0.305488	5.30549
3438.51	68.4342	0.164727	0.164727		88.3828	0.0536322	1.05363		75.3108	0.123143	2.12314		86.871	0.061125	3.06112		75.3691	0.122807	4.12281		67.263	0.172224	5.17222		49.743	0.303268	5.30327
3440.44	68.4943	0.164346	0.164346		88.3972	0.0535615	1.05356		75.2972	0.123221	2.12322		86.8909	0.061026	3.06103		75.3859	0.12271	4.12271		67.3288	0.171799	5.1718		49.9956	0.301068	5.30107
3442.37	68.5402	0.164054	0.164054		88.4721	0.0531936	1.05319		75.3144	0.123122	2.12312		86.9591	0.0606852	3.06069		75.4248	0.122486	4.12249		67.444	0.171057	5.17106		50.2348	0.298995	5.299
3444.3	68.6022	0.163662	0.163662		88.5559	0.0527826	1.05278		75.3369	0.122992	2.12299		87.0069	0.0604464	3.06045		75.5077	0.122009	4.12201		67.4947	0.170731	5.17073		50.4819	0.296865	5.29686
3446.23	68.5864	0.163762	0.163762		88.5531	0.0527962	1.0528		75.3517	0.122907	2.12291		87.0433	0.0602649	3.06026		75.5769	0.121611	4.12161		67.5053	0.170662	5.17066		50.7251	0.294777	5.29478
3448.16	68.5279	0.164133	0.164133		88.5154	0.0529813	1.05298		75.4086	0.122579	2.12258		87.0994	0.0599849	3.05998		75.6364	0.121269	4.12127		67.5479	0.170388	5.17039		50.981	0.292592	5.29259
3450.08	68.4563	0.164586	0.164586		88.5129	0.0529932	1.05299		75.4729	0.122209	2.12221		87.1891	0.0595377	3.05954		75.7048	0.120877	4.12088		67.5565	0.170333	5.17033		51.239	0.290399	5.2904
3452.01	68.3783	0.165081	0.165081		88.551	0.0528064	1.05281		75.4978	0.122065	2.12207		87.2737	0.0591166	3.05912		75.7368	0.120693	4.12069		67.5299	0.170504	5.1705		51.5102	0.288107	5.28811
3453.94	68.33	0.165388	0.165388		88.5859	0.0526353	1.05264		75.4883	0.12212	2.12212		87.3426	0.0587741	3.05877		75.7858	0.120412	4.12041		67.56	0.17031	5.17031		51.8184	0.285516	5.28552
3455.87	68.287	0.165662	0.165662		88.6185	0.0524757	1.05248		75.4305	0.122453	2.12245		87.4228	0.0583754	3.05838		75.8272	0.120175	4.12017		67.5804	0.170179	5.17018		52.1456	0.282782	5.28278
3457.8	68.2646	0.165805	0.165805		88.6812	0.0521684	1.05217		75.3705	0.122798	2.1228		87.4801	0.0580908	3.05809		75.8497	0.120046	4.12005		67.5303	0.170502	5.1705		52.4633	0.280145	5.28014
3459.73	68.2706	0.165766	0.165766		88.7185	0.0519861	1.05199		75.3742	0.122777	2.12278		87.5254	0.0578659	3.05787		75.8679	0.119942	4.11994		67.5967	0.170075	5.17007		52.8128	0.277261	5.27726
3461.66	68.2772	0.165725	0.165725		88.7108	0.0520234	1.05202		75.3935	0.122666	2.12267		87.4984	0.0580001	3.058		75.8288	0.120166	4.12017		67.708	0.16936	5.16936		53.1652	0.274373	5.27437
3463.58	68.3237	0.165428	0.165428		88.7554	0.0518051	1.05181		75.4218	0.122503	2.1225		87.4238	0.0583704	3.05837		75.7506	0.120614	4.12061		67.6519	0.16972	5.16972		53.4737	0.27186	5.27186
3465.51	68.3924	0.164992	0.164992		88.848	0.0513525	1.05135		75.4653	0.122253	2.12225		87.3937	0.0585197	3.05852		75.7101	0.120846	4.12085		67.5747	0.170216	5.17022		53.7739	0.269429	5.26943
3467.44	68.3882	0.165019	0.165019		88.9261	0.0509707	1.05097		75.4835	0.122148	2.12215		87.3966	0.0585054	3.05851		75.7275	0.120746	4.12075		67.5969	0.170073	5.17007		54.0885	0.266895	5.2669
3469.37	68.3641	0.165172	0.165172		88.9551	0.0508293	1.05083		75.5974	0.121493	2.12149		87.3926	0.0585254	3.05853		75.7888	0.120395	4.12039		67.655	0.1697	5.1697		54.3962	0.264431	5.26443
3471.3	68.3585	0.165207	0.165207		88.939	0.0509076	1.05091		75.7934	0.120369	2.12037		87.3725	0.0586253	3.05863		75.8501	0.120044	4.12004		67.6275	0.169876	5.16988		54.6842	0.262138	5.26214
3473.23	68.3029	0.165561	0.165561		88.8967	0.0511143	1.05111		75.9924	0.11923	2.11923		87.3581	0.0586967	3.0587		75.8804	0.11987	4.11987		67.6239	0.1699	5.1699		54.9897	0.259718	5.25972
3475.15	68.2367	0.165982	0.165982		88.8736	0.0512272	1.05123		76.1786	0.118167	2.11817		87.3667	0.0586542	3.05865		75.9098	0.119702	4.1197		67.7091	0.169353	5.16935		55.3241	0.257085	5.25709
3477.08	68.1983	0.166226	0.166226		88.9083	0.0510577	1.05106		76.3171	0.117378	2.11738		87.3796	0.0585898	3.05859		75.9464	0.119493	4.11949		67.7535	0.169069	5.16907		55.6356	0.254647	5.25465
3479.01	68.1835	0.166321	0.166321		88.9649	0.0507811	1.05078		76.4112	0.116843	2.11684		87.3842	0.0585669	3.05857		75.9201	0.119643	4.11964		67.8238	0.168618	5.16862		55.9287	0.252365	5.25237
3480.94	68.2064	0.166175	0.166175		88.9839	0.0506883	1.05069		76.4405	0.116676	2.11668		87.3657	0.0586589	3.05866		75.9156	0.119669	4.11967		67.9495	0.167814	5.16781		56.2415	0.249943	5.24994
3482.87	68.2977	0.165594	0.165594		88.9718	0.0507475	1.05075		76.4323	0.116723	2.11672		87.3459	0.0587576	3.05876		75.9417	0.11952	4.11952		68.07	0.167044	5.16704		56.5808	0.247331	5.24733
3484.8	68.4126	0.164864	0.164864		88.9891	0.0506631	1.05066		76.4476	0.116636	2.11664		87.3602	0.0586862	3.05869		75.9635	0.119395	4.1194		68.0942	0.16689	5.16689		56.9252	0.244695	5.2447
3486.72	68.4577	0.164578	0.164578		89.0591	0.0503218	1.05032		76.5437	0.116091	2.11609		87.3932	0.0585224	3.05852		75.997	0.119203	4.1192		68.0402	0.167234	5.16723		57.2726	0.242053	5.24205
3488.65	68.4783	0.164447	0.164447		89.122	0.050015	1.05001		76.64	0.115544	2.11554		87.4722	0.0581299	3.05813		76.106	0.118581	4.11858		68.0298	0.167301	5.1673		57.6345	0.239318	5.23932
3490.58	68.5584	0.163939	0.163939		89.1682	0.0497898	1.04979		76.7415	0.11497	2.11497		87.5483	0.0577522	3.05775		76.2221	0.117919	4.11792		68.0936	0.166894	5.16689		58.0006	0.236568	5.23657
3492.51	68.6293	0.163491	0.163491		89.1692	0.0497852	1.04979		76.9273	0.113919	2.11392		87.5786	0.0576021	3.0576		76.2699	0.117647	4.11765		68.1427	0.166581	5.16658		58.318	0.234198	5.2342
3494.44	68.6774	0.163186	0.163186		89.1161	0.0500437	1.05004		77.135	0.112749	2.11275		87.6616	0.0571907	3.05719		76.3224	0.117348	4.11735		68.1385	0.166608	5.16661		58.6286	0.231891	5.23189
3496.37	68.7124	0.162965	0.162965		89.0367	0.0504307	1.05043		77.3832	0.111353	2.11135		87.8103	0.0564545	3.05645		76.3915	0.116955	4.11695		68.091	0.16691	5.16691		58.9697	0.229371	5.22937
3498.3	68.7023	0.163029	0.163029		88.9604	0.0508032	1.0508		77.5682	0.110316	2.11032		87.929	0.0558679	3.05587		76.393	0.116946	4.11695		68.0214	0.167354	5.16735		59.2869	0.227042	5.22704
3500.22	68.6334	0.163465	0.163465		88.9231	0.0509856	1.05099		77.6702	0.109746	2.10975		88.0201	0.055418	3.05542		76.377	0.117037	4.11704		67.9716	0.167672	5.16767		59.6028	0.224733	5.22473
3502.15	68.5794	0.163806	0.163806		88.9427	0.0508895	1.05089		77.7083	0.109532	2.10953		88.0026	0.0555045	3.0555		76.346	0.117214	4.11721		67.9105	0.168063	5.16806		59.9297	0.222358	5.22236
3504.08	68.536	0.164081	0.164081		88.9906	0.0506559	1.05066		77.6615	0.109794	2.10979		87.9162	0.0559309	3.05593		76.3471	0.117207	4.11721		67.8571	0.168404	5.1684		60.2251	0.220223	5.22022
3506.01	68.4801	0.164436	0.164436		89.026	0.0504832	1.05048		77.5502	0.110417	2.11042		87.8519	0.056249	3.05625		76.3029	0.117459	4.11746		67.8837	0.168234	5.16823		60.5114	0.218163	5.21816
3507.94	68.4648	0.164533	0.164533		89.0285	0.0504708	1.05047		77.3683	0.111437	2.11144		87.8239	0.0563874	3.05639		76.233	0.117857	4.11786		67.9444	0.167847	5.16785		60.8353	0.215844	5.21584
3509.87	68.429	0.16476	0.16476		89.0286	0.0504704	1.05047		77.3051	0.111792	2.11179		87.9139	0.0559423	3.05594		76.2144	0.117963	4.11796		68.0279	0.167313	5.16731		61.2152	0.21314	5.21314
3511.8	68.2994	0.165583	0.165583		89.0888	0.050177	1.05018		77.3076	0.111778	2.11178		88.0155	0.0554407	3.05544		76.2047	0.118018	4.11802		68.0287	0.167308	5.16731		61.5939	0.210463	5.21046
3513.72	68.1332	0.166641	0.166641		89.1691	0.0497857	1.04979		77.3214	0.1117	2.1117		88.1081	0.0549843	3.05498		76.2636	0.117683	4.11768		68.0123	0.167412	5.16741		61.9987	0.207617	5.20762
3515.65	68.0258	0.167326	0.167326		89.1874	0.0496963	1.0497		77.4343	0.111066	2.11107		88.2279	0.0543943	3.05439		76.4077	0.116863	4.11686		68.1727	0.166389	5.16639		62.4488	0.204476	5.20448
3517.58	68.0045	0.167462	0.167462		89.1686	0.0497882	1.04979		77.6189	0.110032	2.11003		88.2983	0.0540477	3.05405		76.4959	0.116362	4.11636		68.3834	0.165049	5.16505		62.8778	0.201503	5.2015
3519.51	68.0139	0.167402	0.167402		89.184	0.0497128	1.04971		77.871	0.108624	2.10862		88.2566	0.0542526	3.05425		76.4992	0.116343	4.11634		68.4455	0.164655	5.16466		63.2265	0.199101	5.1991
3521.44	68.0883	0.166928	0.166928		89.1793	0.0497358	1.04974		78.1153	0.107264	2.10726		88.2603	0.0542345	3.05423		76.5234	0.116206	4.11621		68.476	0.164462	5.16446		63.5965	0.196567	5.19657
3523.37	68.1934	0.166258	0.166258		89.1343	0.049955	1.04995		78.3278	0.106084	2.10608		88.3779	0.0536565	3.05366		76.5651	0.115969	4.11597		68.5091	0.164252	5.16425		63.9945	0.193857	5.19386
3525.3	68.2739	0.165745	0.165745		89.1088	0.0500794	1.05008		78.5012	0.105124	2.10512		88.3898	0.053598	3.0536		76.5525	0.11604	4.11604		68.4874	0.16439	5.16439		64.3498	0.191453	5.19145
3527.22	68.429	0.16476	0.16476		89.1251	0.05	1.05		78.6293	0.104415	2.10442		88.3578	0.0537549	3.05375		76.5531	0.116037	4.11604		68.3998	0.164945	5.16495		64.6888	0.189171	5.18917
3529.15	68.6287	0.163494	0.163494		89.195	0.0496594	1.04966		78.7006	0.104022	2.10402		88.322	0.0539314	3.05393		76.537	0.116128	4.11613		68.2908	0.165638	5.16564		65.0488	0.18676	5.18676
3531.08	68.7636	0.162642	0.162642		89.2936	0.0491798	1.04918		78.6926	0.104066	2.10407		88.438	0.0533612	3.05336		76.5303	0.116167	4.11617		68.3357	0.165352	5.16535		65.4267	0.184245	5.18424
3533.01	68.879	0.161913	0.161913		89.3444	0.0489325	1.04893		78.6233	0.104449	2.10445		88.5883	0.0526238	3.05262		76.5315	0.11616	4.11616		68.4274	0.16477	5.16477		65.84	0.18151	5.18151
3534.94	68.9187	0.161663	0.161663		89.3611	0.0488517	1.04885		78.5412	0.104903	2.1049		88.6053	0.0525403	3.05254		76.4899	0.116396	4.1164		68.3142	0.165489	5.16549		66.2472	0.178833	5.17883
3536.87	68.8281	0.162234	0.162234		89.3794	0.0487624	1.04876		78.532	0.104953	2.10495		88.629	0.052424	3.05242		76.4603	0.116564	4.11656		68.1458	0.166561	5.16656		66.6456	0.176229	5.17623
3538.8	68.7197	0.162919	0.162919		89.3723	0.048797	1.0488		78.5185	0.105028	2.10503		88.7374	0.0518931	3.05189		76.5271	0.116185	4.11618		68.1176	0.166741	5.16674		67.0898	0.173343	5.17334
3540.72	68.6199	0.16355	0.16355		89.3294	0.0490057	1.04901		78.4895	0.105188	2.10519		88.8087	0.0515447	3.05154		76.6482	0.115498	4.1155		68.1806	0.166339	5.16634		67.5696	0.170249	5.17025
3542.65	68.4683	0.16451	0.16451		89.2977	0.0491595	1.04916		78.4516	0.105398	2.1054		88.8526	0.05133	3.05133		76.7592	0.11487	4.11487		68.2293	0.166029	5.16603		68.0121	0.167414	5.16741
3544.58	68.3805	0.165068	0.165068		89.3001	0.0491481	1.04915		78.3942	0.105716	2.10572		88.8653	0.051268	3.05127		76.805	0.114611	4.11461		68.2258	0.166052	5.16605		68.3722	0.165121	5.16512
3546.51	68.3263	0.165412	0.165412		89.2911	0.0491919	1.04919		78.4207	0.105569	2.10557		88.8964	0.051116	3.05112		76.8456	0.114381	4.11438		68.2997	0.165581	5.16558		68.6941	0.163081	5.16308
3548.44	68.2545	0.165869	0.165869		89.2537	0.0493739	1.04937		78.4734	0.105277	2.10528		88.9483	0.0508623	3.05086		76.9166	0.11398	4.11398		68.3905	0.165005	5.165		69.0564	0.160796	5.1608
3550.36	68.2325	0.166009	0.166009		89.2343	0.0494683	1.04947		78.5055	0.1051	2.1051		88.9298	0.0509528	3.05095		76.9444	0.113823	4.11382		68.3487	0.16527	5.16527		69.4281	0.158465	5.15846
3552.29	68.2549	0.165866	0.165866		89.2558	0.0493635	1.04936		78.5156	0.105044	2.10504		88.9726	0.0507438	3.05074		76.944	0.113825	4.11383		68.2982	0.165591	5.16559		69.85	0.155834	5.15583
3554.22	68.2272	0.166042	0.166042		89.2801	0.0492453	1.04925		78.6221	0.104456	2.10446		89.2381	0.0494497	3.04945		77.0917	0.112993	4.11299		68.6173	0.163566	5.16357		70.3643	0.152647	5.15265
3556.15	68.0918	0.166905	0.166905		89.324	0.0490318	1.04903		78.7248	0.103889	2.10389		89.3534	0.0488891	3.04889		77.1725	0.112537	4.11254		68.8775	0.161922	5.16192		70.873	0.149519	5.14952
3558.08	67.9425	0.167858	0.167858		89.3749	0.0487843	1.04878		78.8154	0.103389	2.10339		89.4809	0.0482699	3.04827		77.2168	0.112288	4.11229		69.0219	0.161013	5.16101		71.3602	0.146544	5.14654
3560.01	67.9113	0.168058	0.168058		89.3962	0.0486808	1.04868		78.9351	0.10273	2.10273		89.5046	0.0481544	3.04815		77.2852	0.111903	4.1119		69.0876	0.1606	5.1606		71.8423	0.14362	5.14362
3561.94	67.8868	0.168215	0.168215		89.4206	0.0485623	1.04856		79.0378	0.102165	2.10216		89.4261	0.0485356	3.04854		77.2933	0.111858	4.11186		69.0201	0.161024	5.16102		72.2872	0.140939	5.14094
3563.86	67.8944	0.168166	0.168166		89.431	0.0485121	1.04851		79.1946	0.101305	2.1013		89.4297	0.0485183	3.04852		77.3078	0.111777	4.11178		68.9996	0.161153	5.16115		72.7058	0.138431	5.13843
3565.79	68.0083	0.167438	0.167438		89.3972	0.0486762	1.04868		79.3908	0.10023	2.10023		89.5061	0.0481475	3.04815		77.3789	0.111377	4.11138		69.0814	0.160639	5.16064		73.1392	0.13585	5.13585
3567.72	68.1503	0.166532	0.166532		89.3733	0.0487924	1.04879		79.5052	0.0996045	2.0996		89.4987	0.0481832	3.04818		77.3816	0.111362	4.11136		69.078	0.16066	5.16066		73.5593	0.133363	5.13336
3569.65	68.3284	0.165398	0.165398		89.4392	0.0484719	1.04847		79.5668	0.0992683	2.09927		89.5047	0.0481542	3.04815		77.2864	0.111897	4.1119		68.9893	0.161218	5.16122		73.9033	0.131336	5.13134
3571.58	68.566	0.163891	0.163891		89.5298	0.0480324	1.04803		79.6867	0.0986142	2.09861		89.5098	0.0481296	3.04813		77.1518	0.112654	4.11265		68.8185	0.162295	5.16229		74.1615	0.129822	5.12982
3573.51	68.691	0.1631	0.1631		89.5351	0.0480067	1.04801		79.781	0.0981007	2.0981		89.8326	0.0465661	3.04657		77.2012	0.112376	4.11238		68.8269	0.162242	5.16224		74.5397	0.127612	5.12761
3575.44	68.719	0.162923	0.162923		89.5419	0.0479736	1.04797		79.8138	0.097922	2.09792		90.1166	0.0451951	3.0452		77.3487	0.111547	4.11155		69.044	0.160874	5.16087		74.9916	0.124988	5.12499
3577.36	68.8183	0.162296	0.162296		89.6451	0.0474736	1.04747		79.7128	0.0984717	2.09847		90.1183	0.045187	3.04519		77.428	0.111102	4.1111		69.0192	0.16103	5.16103		75.3524	0.122903	5.1229
3579.29	68.9093	0.161722	0.161722		89.7445	0.0469924	1.04699		79.6363	0.0988891	2.09889		90.2923	0.0443492	3.04435		77.5547	0.110392	4.11039		69.0712	0.160703	5.1607		75.7897	0.12039	5.12039
3581.22	68.9298	0.161593	0.161593		89.8127	0.0466622	1.04666		79.6739	0.0986841	2.09868		90.5605	0.0430611	3.04306		77.8183	0.108918	4.10892		69.455	0.158296	5.1583		76.3004	0.117473	5.11747
3583.15	68.8339	0.162198	0.162198		89.8531	0.0464669	1.04647		79.5245	0.0994992	2.0995		90.4799	0.0434479	3.04345		77.9149	0.10838	4.10838		69.5054	0.157982	5.15798		76.6925	0.115247	5.11525
3585.08	68.7227	0.1629	0.1629		89.8683	0.0463937	1.04639		79.3623	0.100386	2.10039		90.3771	0.0439414	3.04394		77.8974	0.108477	4.10848		69.4073	0.158595	5.15859		77.0482	0.113238	5.11324
3587.01	68.6486	0.163368	0.163368		89.8261	0.0465973	1.0466		79.3085	0.10068	2.10068		90.3177	0.0442273	3.04423		77.9055	0.108432	4.10843		69.4471	0.158346	5.15835		77.4706	0.110863	5.11086
3588.94	68.5425	0.16404	0.16404		89.7172	0.0471242	1.04712		79.2971	0.100742	2.10074		90.0544	0.045495	3.04549		77.9172	0.108367	4.10837		69.4721	0.15819	5.15819		77.8403	0.108795	5.1088
3590.86	68.4952	0.16434	0.16434		89.5955	0.0477139	1.04771		79.3194	0.100621	2.10062		89.6218	0.0475865	3.04759		77.8625	0.108672	4.10867		69.3649	0.15886	5.15886		78.1003	0.107347	5.10735
3592.79	68.5542	0.163966	0.163966		89.4977	0.0481881	1.04819		79.3843	0.100265	2.10027		89.2451	0.0494157	3.04942		77.7916	0.109067	4.10907		69.1465	0.16023	5.16023		78.3727	0.105835	5.10584
3594.72	68.5802	0.163801	0.163801		89.495	0.0482012	1.0482		79.4332	0.0999982	2.1		89.1119	0.0500641	3.05006		77.7499	0.1093	4.1093		69.0895	0.160588	5.16059		78.7372	0.10382	5.10382
3596.65	68.5295	0.164122	0.164122		89.6206	0.0475919	1.04759		79.5124	0.099565	2.09957		89.0334	0.0504471	3.05045		77.5919	0.110183	4.11018		69.1536	0.160185	5.16019		79.0392	0.102157	5.10216
3598.58	68.3617	0.165187	0.165187		89.7131	0.0471441	1.04714		79.667	0.0987216	2.09872		89.121	0.0500199	3.05002		77.4759	0.110833	4.11083		69.1988	0.159902	5.1599		79.3314	0.100555	5.10055
3600.51	68.1224	0.16671	0.16671		89.7446	0.0469916	1.04699		79.7978	0.098009	2.09801		89.5206	0.0480772	3.04808		77.5849	0.110223	4.11022		69.4898	0.158079	5.15808		79.7163	0.0984531	5.09845
3602.43	68.0271	0.167318	0.167318		89.8142	0.0466549	1.04665		79.8746	0.0975912	2.09759		89.604	0.0476725	3.04767		77.6407	0.10991	4.10991		69.6251	0.157234	5.15723		79.9813	0.0970116	5.09701
3604.36	68.0426	0.167219	0.167219		89.9237	0.0461256	1.04613		79.8802	0.0975607	2.09756		89.6468	0.0474652	3.04747		77.6664	0.109767	4.10977		69.3681	0.15884	5.15884		80.1959	0.095848	5.09585
3606.29	67.9774	0.167635	0.167635		89.9199	0.046144	1.04614		79.8235	0.0978693	2.09787		90.0742	0.0453995	3.0454		77.7902	0.109075	4.10908		69.2554	0.159547	5.15955		80.5702	0.0938257	5.09383
3608.22	67.8671	0.168341	0.168341		89.8968	0.0462557	1.04626		79.7101	0.0984865	2.09849		90.2949	0.0443366	3.04434		77.894	0.108496	4.1085		69.0906	0.160581	5.16058		80.8897	0.0921067	5.09211
3610.15	67.7067	0.169368	0.169368		89.8756	0.0463583	1.04636		79.6104	0.0990303	2.09903		90.1837	0.044872	3.04487		77.8678	0.108642	4.10864		68.5769	0.163822	5.16382		81.1421	0.0907536	5.09075
3612.08	67.6447	0.169766	0.169766		89.8058	0.0466957	1.0467		79.6524	0.0988011	2.0988		89.9632	0.045935	3.04594		77.7263	0.109432	4.10943		67.9996	0.167493	5.16749		81.419	0.0892744	5.08927
3614.01	67.6734	0.169582	0.169582		89.7132	0.0471437	1.04714		79.7198	0.0984336	2.09843		89.9462	0.0460172	3.04602		77.6825	0.109677	4.10968		67.651	0.169725	5.16973		81.778	0.0873633	5.08736
3615.93	67.6499	0.169733	0.169733		89.6436	0.0474809	1.04748		79.8815	0.0975539	2.09755		89.9222	0.0461333	3.04613		77.8855	0.108544	4.10854		67.8058	0.168733	5.16873		82.2525	0.0848507	5.08485
3617.86	67.7774	0.168915	0.168915		89.6417	0.0474898	1.04749		80.0611	0.0965786	2.09658		89.4674	0.048335	3.04833		77.8357	0.108821	4.10882		68.1118	0.166778	5.16678		82.5168	0.0834575	5.08346
3619.79	67.9765	0.167641	0.167641		89.6817	0.0472962	1.0473		80.3175	0.0951899	2.09519		89.2294	0.0494918	3.04949		77.8534	0.108722	4.10872		68.5056	0.164274	5.16427		82.8121	0.0819061	5.08191
3621.72	68.0558	0.167135	0.167135		89.7591	0.0469216	1.04692		80.6246	0.0935323	2.09353		89.1843	0.0497113	3.04971		77.9142	0.108383	4.10838		69.0281	0.160974	5.16097		83.1518	0.0801283	5.08013
3623.65	68.0694	0.167048	0.167048		89.8789	0.0463422	1.04634		80.8889	0.0921111	2.09211		89.1366	0.049944	3.04994		77.8152	0.108936	4.10894		69.4849	0.15811	5.15811		83.4138	0.0787619	5.07876
3625.58	68.1081	0.166801	0.166801		89.9387	0.0460535	1.04605		81.0379	0.091312	2.09131		89.207	0.0496012	3.0496		77.7558	0.109267	4.10927		69.8405	0.155893	5.15589		83.6885	0.0773342	5.07733
3627.51	68.1806	0.166339	0.166339		89.9629	0.0459367	1.04594		81.0662	0.0911601	2.09116		89.3512	0.0488996	3.0489		77.7172	0.109483	4.10948		69.9985	0.154911	5.15491		83.9468	0.0759957	5.076
3629.43	68.2687	0.165778	0.165778		89.9509	0.0459945	1.04599		80.9836	0.0916029	2.0916		89.5217	0.0480718	3.04807		77.5968	0.110156	4.11016		69.6996	0.15677	5.15677		84.1566	0.0749118	5.07491
3631.36	68.3219	0.16544	0.16544		89.8768	0.0463523	1.04635		80.7698	0.0927511	2.09275		89.8608	0.0464297	3.04643		77.5536	0.110398	4.1104		69.3017	0.159256	5.15926		84.4114	0.073599	5.0736
3633.29	68.2667	0.165791	0.165791		89.7011	0.0472021	1.0472		80.5475	0.0939479	2.09395		90.3341	0.0441484	3.04415		77.5976	0.110152	4.11015		68.9963	0.161174	5.16117		84.7341	0.0719418	5.07194
3635.22	67.9945	0.167526	0.167526		89.727	0.0470769	1.04708		80.5312	0.0940357	2.09404		90.7528	0.0421399	3.04214		77.6038	0.110117	4.11012		68.6574	0.163313	5.16331		85.0588	0.0702806	5.07028
3637.15	67.7501	0.16909	0.16909		89.7726	0.0468561	1.04686		80.4525	0.0944607	2.09446		90.7673	0.0420704	3.04207		77.8257	0.108877	4.10888		68.5683	0.163876	5.16388		85.5331	0.0678659	5.06787
3639.08	67.828	0.168591	0.168591		89.6475	0.0474618	1.04746		80.1562	0.0960631	2.09606		90.3079	0.0442742	3.04427		77.9695	0.108075	4.10808		68.4488	0.164634	5.16463		85.8652	0.0661828	5.06618
3641.01	68.0023	0.167476	0.167476		89.5635	0.047869	1.04787		79.8468	0.0977425	2.09774		89.9711	0.045897	3.0459		78.1106	0.10729	4.10729		68.5281	0.164131	5.16413		86.1778	0.0646046	5.0646
3642.93	68.112	0.166776	0.166776		89.5183	0.048088	1.04809		79.7597	0.0982167	2.09822		89.7228	0.0470971	3.0471		78.3789	0.105801	4.1058		69.1359	0.160296	5.1603		86.6119	0.0624226	5.06242
3644.86	68.3001	0.165579	0.165579		89.5115	0.048121	1.04812		79.6689	0.0987111	2.09871		88.9266	0.0509684	3.05097		78.2552	0.106487	4.10649		69.6183	0.157277	5.15728		86.7507	0.0617272	5.06173
3646.79	68.4134	0.164859	0.164859		89.5357	0.0480037	1.048		79.7065	0.098506	2.09851		88.452	0.0532922	3.05329		78.1785	0.106913	4.10691		69.901	0.155517	5.15552		86.8706	0.061127	5.06113
3648.72	68.4472	0.164644	0.164644		89.599	0.0476967	1.0477		79.8305	0.0978313	2.09783		88.2061	0.0545011	3.0545		78.0543	0.107603	4.1076		69.9315	0.155327	5.15533		86.9814	0.0605737	5.06057
3650.65	68.5074	0.164263	0.164263		89.7143	0.0471382	1.04714		79.8616	0.097662	2.09766		88.1368	0.0548427	3.05484		77.8404	0.108795	4.10879		69.8365	0.155917	5.15592		87.0718	0.0601222	5.06012
3652.58	68.5509	0.163987	0.163987		89.8533	0.0464658	1.04647		79.7615	0.0982067	2.09821		88.1741	0.0546591	3.05466		77.6073	0.110097	4.1101		69.59	0.157453	5.15745		87.155	0.0597078	5.05971
3654.5	68.5053	0.164276	0.164276		89.9948	0.0457825	1.04578		79.7295	0.0983809	2.09838		88.454	0.0532827	3.05328		77.3701	0.111427	4.11143		69.2054	0.15986	5.15986		87.2883	0.0590438	5.05904
3656.43	68.2849	0.165675	0.165675		90.0703	0.0454182	1.04542		79.8848	0.097536	2.09754		89.0577	0.0503283	3.05033		77.3989	0.111265	4.11127		69.08	0.160648	5.16065		87.5087	0.0579487	5.05795
3658.36	68.2504	0.165895	0.165895		90.0568	0.0454834	1.04548		80.0395	0.0966959	2.0967		89.3074	0.0491124	3.04911		77.317	0.111725	4.11173		68.7841	0.162512	5.16251		87.6565	0.0572159	5.05722
3660.29	68.2298	0.166026	0.166026		90.0264	0.0456303	1.04563		80.2472	0.0955702	2.09557		89.8063	0.0466932	3.04669		77.2195	0.112273	4.11227		68.5098	0.164247	5.16425		87.8744	0.0561378	5.05614
3662.22	67.9984	0.167501	0.167501		90.1365	0.0450995	1.0451		80.4731	0.0943495	2.09435		90.8715	0.0415724	3.04157		77.4185	0.111155	4.11116		68.7647	0.162635	5.16263		88.3628	0.0537307	5.05373
3664.15	67.9273	0.167956	0.167956		90.1277	0.0451417	1.04514		80.4714	0.0943587	2.09436		90.6686	0.0425432	3.04254		77.7369	0.109373	4.10937		69.2901	0.159329	5.15933		88.8352	0.0514151	5.05142
3666.07	68.0593	0.167113	0.167113		89.9205	0.0461412	1.04614		80.4401	0.0945275	2.09453		89.9874	0.0458181	3.04582		77.856	0.108708	4.10871		69.3701	0.158827	5.15883		89.0072	0.0505748	5.05057
3668	68.1776	0.166358	0.166358		89.7749	0.0468451	1.04685		80.4526	0.0944599	2.09446		89.4956	0.0481981	3.0482		77.8855	0.108543	4.10854		69.2684	0.159465	5.15947		89.1162	0.0500435	5.05004
3669.93	68.267	0.165789	0.165789		89.6663	0.0473706	1.04737		80.4872	0.0942733	2.09427		89.1427	0.0499141	3.04991		77.861	0.10868	4.10868		69.2858	0.159356	5.15936		89.2397	0.0494421	5.04944
3671.86	68.373	0.165115	0.165115		89.575	0.0478132	1.04781		80.5139	0.0941294	2.09413		88.6385	0.0523777	3.05238		77.6312	0.109963	4.10996		69.1693	0.160087	5.16009		89.2146	0.0495642	5.04956
3673.79	68.5118	0.164235	0.164235		89.4894	0.0482286	1.04823		80.6363	0.0934693	2.09347		88.5427	0.0528471	3.05285		77.4457	0.111003	4.111		68.961	0.161396	5.1614		89.1889	0.049689	5.04969
3675.72	68.6129	0.163594	0.163594		89.4736	0.0483053	1.04831		80.794	0.0926206	2.09262		88.9864	0.0506764	3.05068		77.4858	0.110778	4.11078		68.911	0.161712	5.16171		89.3512	0.0488996	5.0489
3677.65	68.459	0.164569	0.164569		89.4612	0.0483652	1.04837		80.9703	0.0916744	2.09167		89.1668	0.0497967	3.0498		77.6393	0.109918	4.10992		68.91	0.161718	5.16172		89.5137	0.0481103	5.04811
3679.57	68.1567	0.166492	0.166492		89.4729	0.0483086	1.04831		81.0173	0.0914222	2.09142		89.0804	0.0502179	3.05022		77.7443	0.109331	4.10933		68.7546	0.162698	5.1627		89.6567	0.0474173	5.04742
3681.5	67.8926	0.168178	0.168178		89.4718	0.0483139	1.04831		81.1086	0.0909329	2.09093		89.0951	0.050146	3.05015		77.8543	0.108717	4.10872		68.6513	0.163351	5.16335		89.8264	0.0465962	5.0466
3683.43	67.6344	0.169832	0.169832		89.3974	0.048675	1.04867		81.2342	0.0902611	2.09026		89.1915	0.0496764	3.04968		78.0281	0.107749	4.10775		68.6996	0.163046	5.16305		89.9531	0.0459841	5.04598
3685.36	67.6637	0.169644	0.169644		89.3027	0.0491355	1.04914		81.1372	0.0907799	2.09078		88.9838	0.0506891	3.05069		77.8678	0.108642	4.10864		68.2939	0.165618	5.16562		89.9166	0.0461602	5.04616
3687.29	67.7489	0.169097	0.169097		89.276	0.0492651	1.04927		80.9509	0.0917782	2.09178		89.3447	0.0489311	3.04893		77.7812	0.109126	4.10913		68.0885	0.166926	5.16693		90.046	0.0455358	5.04554
3689.22	67.698	0.169424	0.169424		89.357	0.0488716	1.04887		80.8534	0.0923014	2.0923		90.0211	0.0456558	3.04566		77.9025	0.108449	4.10845		68.4163	0.16484	5.16484		90.3821	0.0439176	5.04392
3691.15	67.5897	0.170119	0.170119		89.4968	0.0481923	1.04819		80.7361	0.0929324	2.09293		89.7197	0.047112	3.04711		77.8151	0.108936	4.10894		68.5836	0.16378	5.16378		90.491	0.0433946	5.04339
3693.07	67.4777	0.17084	0.17084		89.5617	0.0478778	1.04788		80.6388	0.0934561	2.09346		89.4942	0.0482053	3.04821		77.6677	0.10976	4.10976		68.3615	0.165189	5.16519		90.453	0.0435772	5.04358
3695	67.583	0.170162	0.170162		89.5992	0.047696	1.0477		80.4901	0.0942574	2.09426		89.3521	0.0488951	3.0489		77.4302	0.11109	4.11109		67.9244	0.167974	5.16797		90.3696	0.0439778	5.04398
3696.93	67.7525	0.169075	0.169075		89.6232	0.0475796	1.04758		80.4817	0.0943026	2.0943		89.5641	0.0478659	3.04787		77.2244	0.112246	4.11225		67.8095	0.168709	5.16871		90.342	0.0441102	5.04411
3698.86	67.8674	0.168339	0.168339		89.5545	0.0479124	1.04791		80.4964	0.0942235	2.09422		89.9603	0.0459492	3.04595		77.1652	0.112579	4.11258		67.9498	0.167812	5.16781		90.4338	0.0436695	5.04367
3700.79	68.0349	0.167268	0.167268		89.407	0.0486285	1.04863		80.3747	0.0948805	2.09488		90.2825	0.0443965	3.0444		77.1789	0.112502	4.1125		68.0466	0.167194	5.16719		90.5593	0.0430668	5.04307
3702.72	68.0389	0.167242	0.167242		89.2986	0.0491556	1.04916		80.2668	0.0954643	2.09546		90.5002	0.0433507	3.04335		77.2729	0.111973	4.11197		68.1747	0.166377	5.16638		90.7022	0.0423824	5.04238
3704.65	67.8043	0.168743	0.168743		89.1972	0.049649	1.04965		80.1679	0.0959995	2.096		90.3113	0.044258	3.04426		77.3181	0.111719	4.11172		68.2421	0.165947	5.16595		90.7554	0.0421275	5.04213
3706.57	67.7455	0.169119	0.169119		89.1528	0.0498652	1.04987		79.9323	0.0972775	2.09728		90.0611	0.0454628	3.04546		77.2441	0.112135	4.11213		68.1854	0.166309	5.16631		90.7582	0.0421141	5.04211
3708.5	67.8622	0.168372	0.168372		89.1125	0.0500614	1.05006		79.7691	0.0981651	2.09817		89.9763	0.0458717	3.04587		77.1454	0.11269	4.11269		68.194	0.166254	5.16625		90.7701	0.0420572	5.04206
3710.43	67.9563	0.16777	0.16777		89.1269	0.049991	1.04999		79.7036	0.0985221	2.09852		89.9108	0.0461879	3.04619		77.0578	0.113183	4.11318		68.2828	0.165688	5.16569		90.7956	0.041935	5.04193
3712.36	67.9979	0.167504	0.167504		89.1513	0.0498726	1.04987		79.7513	0.0982621	2.09826		89.8977	0.0462512	3.04625		77.0327	0.113325	4.11332		68.2868	0.165663	5.16566		90.8525	0.0416629	5.04166
3714.29	67.9667	0.167704	0.167704		89.2039	0.0496163	1.04962		79.8347	0.0978085	2.09781		89.8672	0.0463986	3.0464		76.9536	0.113771	4.11377		68.373	0.165115	5.16512		90.9747	0.0410792	5.04108
3716.22	67.8848	0.168227	0.168227		89.3378	0.0489646	1.04896		79.8206	0.0978849	2.09788		89.6613	0.0473952	3.0474		76.7921	0.114684	4.11468		68.3563	0.165222	5.16522		90.9689	0.041107	5.04111
3718.14	67.7652	0.168993	0.168993		89.5615	0.0478787	1.04788		79.8425	0.0977658	2.09777		89.5371	0.047997	3.048		76.691	0.115256	4.11526		68.1458	0.166561	5.16656		90.9403	0.0412435	5.04124
3720.07	67.6198	0.169926	0.169926		89.6714	0.0473463	1.04735		80.0662	0.0965509	2.09655		89.7111	0.0471537	3.04715		76.7566	0.114884	4.11488		67.8958	0.168157	5.16816		91.05	0.0407199	5.04072
3722	67.5831	0.170162	0.170162		89.5475	0.0479464	1.04795		80.2895	0.0953414	2.09534		90.2092	0.044749	3.04475		77.0018	0.113499	4.1135		67.9012	0.168123	5.16812		91.2629	0.0397059	5.03971
3723.93	67.6595	0.169671	0.169671		89.4041	0.0486426	1.04864		80.3325	0.0951087	2.09511		90.4754	0.0434697	3.04347		77.2512	0.112095	4.11209		68.1854	0.166309	5.16631		91.3702	0.0391956	5.0392
3725.86	67.701	0.169405	0.169405		89.2876	0.0492087	1.04921		80.0718	0.0965206	2.09652		90.3475	0.0440839	3.04408		77.3392	0.111601	4.1116		68.4103	0.164879	5.16488		91.4158	0.0389788	5.03898
3727.79	67.7524	0.169075	0.169075		89.1673	0.0497941	1.04979		79.6974	0.0985561	2.09856		89.898	0.0462498	3.04625		77.1317	0.112767	4.11277		68.3023	0.165564	5.16556		91.2702	0.0396711	5.03967
3729.72	67.6238	0.1699	0.1699		89.0817	0.0502116	1.05021		79.4598	0.0998528	2.09985		89.6128	0.0476298	3.04763		76.8852	0.114157	4.11416		68.3235	0.16543	5.16543		91.1411	0.0402857	5.04029
3731.64	67.355	0.17163	0.17163		89.0794	0.0502227	1.05022		79.2124	0.101207	2.10121		89.582	0.0477794	3.04778		76.9595	0.113738	4.11374		68.6282	0.163497	5.1635		91.2625	0.0397077	5.03971
3733.57	67.3388	0.171734	0.171734		89.1771	0.0497468	1.04975		78.9483	0.102657	2.10266		89.204	0.0496159	3.04962		77.049	0.113233	4.11323		68.4976	0.164325	5.16432		91.2406	0.0398117	5.03981
3735.5	67.3801	0.171468	0.171468		89.3066	0.0491164	1.04912		78.9866	0.102446	2.10245		89.0313	0.0504574	3.05046		77.1588	0.112614	4.11261		68.2073	0.166169	5.16617		91.219	0.0399146	5.03991
3737.43	67.275	0.172147	0.172147		89.4018	0.0486539	1.04865		79.2488	0.101007	2.10101		88.8915	0.0511399	3.05114		77.3424	0.111582	4.11158		68.4281	0.164765	5.16477		91.2995	0.0395315	5.03953
3739.36	67.0737	0.173448	0.173448		89.4166	0.0485817	1.04858		79.3803	0.100287	2.10029		88.2867	0.0541049	3.0541		77.3887	0.111322	4.11132		68.591	0.163733	5.16373		91.4136	0.0389893	5.03899
3741.29	66.8926	0.174622	0.174622		89.4769	0.0482892	1.04829		79.3187	0.100624	2.10062		87.3047	0.0589623	3.05896		77.1013	0.112939	4.11294		68.52	0.164183	5.16418		91.345	0.0393153	5.03932
3743.22	66.8114	0.17515	0.17515		89.5519	0.0479254	1.04793		79.28	0.100836	2.10084		86.6813	0.0620744	3.06207		76.8168	0.114544	4.11454		68.4326	0.164737	5.16474		91.1986	0.0400117	5.04001
3745.14	66.694	0.175913	0.175913		89.6468	0.0474654	1.04747		79.556	0.0993271	2.09933		86.8098	0.0614314	3.06143		76.7665	0.114828	4.11483		68.4932	0.164352	5.16435		91.2205	0.0399074	5.03991
3747.07	66.5713	0.176713	0.176713		89.5826	0.0477762	1.04778		79.8486	0.0977326	2.09773		87.1009	0.0599773	3.05998		76.8068	0.1146	4.1146		68.6344	0.163458	5.16346		91.3356	0.0393598	5.03936
3749	66.6745	0.17604	0.17604		89.3751	0.0487833	1.04878		79.8882	0.0975171	2.09752		87.2181	0.0593936	3.05939		76.7533	0.114903	4.1149		68.7263	0.162877	5.16288		91.3461	0.0393098	5.03931
3750.93	66.9283	0.17439	0.17439		89.261	0.0493383	1.04934		79.7689	0.0981663	2.09817		87.1481	0.0597421	3.05974		76.5507	0.116051	4.11605		68.7972	0.162429	5.16243		91.2544	0.0397464	5.03975
3752.86	67.0784	0.173417	0.173417		89.2127	0.0495731	1.04957		79.6212	0.0989716	2.09897		87.2934	0.0590185	3.05902		76.3143	0.117394	4.11739		68.7895	0.162478	5.16248		91.2125	0.0399456	5.03995
3754.79	67.1634	0.172868	0.172868		89.159	0.0498348	1.04983		79.4953	0.0996584	2.09966		87.6475	0.0572605	3.05726		76.1241	0.118478	4.11848		68.6853	0.163136	5.16314		91.1954	0.0400269	5.04003
3756.72	67.1124	0.173197	0.173197		89.1013	0.0501158	1.05012		79.3659	0.100366	2.10037		88.3053	0.0540134	3.05401		76.2281	0.117885	4.11788		68.7453	0.162757	5.16276		91.4022	0.0390434	5.03904
3758.64	67.1067	0.173234	0.173234		89.0861	0.0501901	1.05019		79.2505	0.100998	2.101		88.8695	0.0512473	3.05125		76.5693	0.115945	4.11595		68.5713	0.163857	5.16386		91.657	0.0378345	5.03783
3760.57	67.2657	0.172206	0.172206		89.1236	0.0500073	1.05001		79.2588	0.100952	2.10095		89.1731	0.0497663	3.04977		76.7846	0.114726	4.11473		67.9506	0.167807	5.16781		91.6754	0.0377472	5.03775
3762.5	67.3889	0.171411	0.171411		89.146	0.0498979	1.0499		79.4852	0.0997139	2.09971		89.7051	0.0471828	3.04718		76.9794	0.113625	4.11363		67.58	0.170182	5.17018		91.7882	0.0372131	5.03721
3764.43	67.4152	0.171242	0.171242		89.0896	0.0501728	1.05017		79.6794	0.0986541	2.09865		90.0911	0.0453181	3.04532		77.1897	0.112441	4.11244		67.8102	0.168705	5.16871		92.0542	0.0359566	5.03596
3766.36	67.4043	0.171313	0.171313		89.0545	0.0503441	1.05034		79.7609	0.0982101	2.09821		90.0846	0.0453494	3.04535		77.2874	0.111891	4.11189		67.9793	0.167623	5.16762		92.2952	0.0348209	5.03482
3768.29	67.4621	0.17094	0.17094		89.1383	0.0499356	1.04994		79.8781	0.0975721	2.09757		89.9363	0.046065	3.04607		77.2046	0.112357	4.11236		67.9203	0.168	5.168		92.2616	0.0349792	5.03498
3770.21	67.4783	0.170836	0.170836		89.2312	0.0494832	1.04948		80.1044	0.0963437	2.09634		90.1705	0.0449358	3.04494		77.2253	0.11224	4.11224		68.0111	0.16742	5.16742		92.284	0.0348734	5.03487
3772.14	67.3742	0.171506	0.171506		89.3188	0.0490569	1.04906		80.3611	0.0949544	2.09495		90.5613	0.0430573	3.04306		77.371	0.111422	4.11142		68.1679	0.16642	5.16642		92.424	0.0342153	5.03422
3774.07	67.3479	0.171676	0.171676		89.4018	0.0486535	1.04865		80.434	0.0945601	2.09456		90.5772	0.0429813	3.04298		77.4364	0.111055	4.11106		68.2337	0.166001	5.166		92.5014	0.0338519	5.03385
3776	67.3983	0.171351	0.171351		89.4729	0.0483083	1.04831		80.4096	0.094692	2.09469		90.3613	0.0440177	3.04402		77.3892	0.111319	4.11132		68.2587	0.165842	5.16584		92.4611	0.0340408	5.03404
3777.93	67.3734	0.171511	0.171511		89.5037	0.0481591	1.04816		80.3944	0.0947741	2.09477		90.2928	0.0443471	3.04435		77.3849	0.111344	4.11134		68.3969	0.164964	5.16496		92.413	0.0342671	5.03427
3779.86	67.3497	0.171664	0.171664		89.5079	0.0481389	1.04814		80.3042	0.0952615	2.09526		90.2148	0.0447222	3.04472		77.3809	0.111366	4.11137		68.3814	0.165062	5.16506		92.3263	0.0346748	5.03467
3781.78	67.3343	0.171763	0.171763		89.522	0.0480703	1.04807		80.2003	0.0958242	2.09582		90.2452	0.044576	3.04458		77.3931	0.111298	4.1113		68.3395	0.165328	5.16533		92.314	0.0347323	5.03473
3783.71	67.2978	0.171999	0.171999		89.5152	0.0481032	1.0481		80.1486	0.0961042	2.0961		90.3718	0.043967	3.04397		77.4735	0.110847	4.11085		68.3603	0.165196	5.1652		92.4118	0.0342727	5.03427
3785.64	67.411	0.171269	0.171269		89.5035	0.0481599	1.04816		80.0761	0.0964969	2.0965		90.2874	0.0443727	3.04437		77.3843	0.111347	4.11135		68.0705	0.167041	5.16704		92.3495	0.0345654	5.03457
3787.57	67.4583	0.170964	0.170964		89.4413	0.0484618	1.04846		80.0787	0.0964831	2.09648		90.5615	0.0430562	3.04306		77.4326	0.111076	4.11108		68.082	0.166968	5.16697		92.4775	0.033964	5.03396
3789.5	67.3784	0.171479	0.171479		89.4286	0.0485236	1.04852		80.1234	0.0962408	2.09624		90.6304	0.0427263	3.04273		77.3471	0.111556	4.11156		68.18	0.166343	5.16634		92.6367	0.0332168	5.03322
3791.43	67.3101	0.17192	0.17192		89.497	0.0481914	1.04819		80.1264	0.0962243	2.09622		90.5777	0.0429785	3.04298		77.1821	0.112483	4.11248		68.2933	0.165622	5.16562		92.7264	0.0327966	5.0328
3793.36	67.1336	0.17306	0.17306		89.5614	0.0478789	1.04788		80.2865	0.0953574	2.09536		90.6982	0.0424011	3.0424		77.1915	0.112431	4.11243		68.7124	0.162965	5.16296		92.9334	0.031828	5.03183
3795.28	67.0079	0.173874	0.173874		89.6658	0.0473733	1.04737		80.3732	0.0948888	2.09489		90.4524	0.0435799	3.04358		77.0828	0.113043	4.11304		68.8815	0.161898	5.1619		93.0263	0.0313943	5.03139
3797.21	66.9273	0.174397	0.174397		89.7764	0.0468376	1.04684		80.3737	0.0948858	2.09489		90.3054	0.0442863	3.04429		76.9798	0.113623	4.11362		68.9834	0.161256	5.16126		93.1124	0.0309926	5.03099
3799.14	66.9058	0.174536	0.174536		89.875	0.0463612	1.04636		80.3295	0.0951251	2.09513		90.1597	0.0449873	3.04499		76.9079	0.114029	4.11403		68.9822	0.161263	5.16126		93.1608	0.0307667	5.03077
3801.07	66.9408	0.174309	0.174309		89.9687	0.0459087	1.04591		80.2892	0.0953431	2.09534		90.0043	0.0457367	3.04574		76.9201	0.11396	4.11396		68.9013	0.161773	5.16177		93.1695	0.0307261	5.03073
3803	66.8749	0.174737	0.174737		89.9802	0.0458528	1.04585		80.2887	0.0953456	2.09535		90.0392	0.0455682	3.04557		77.0337	0.113319	4.11332		69.0264	0.160985	5.16098		93.2831	0.0301969	5.0302
3804.93	66.8487	0.174907	0.174907		89.9689	0.0459074	1.04591		80.2636	0.0954814	2.09548		89.9111	0.0461866	3.04619		76.9649	0.113707	4.11371		68.9158	0.161681	5.16168		93.3168	0.0300403	5.03004
3806.86	66.7563	0.175508	0.175508		89.8846	0.0463148	1.04631		80.4187	0.094643	2.09464		90.0394	0.0455675	3.04557		77.033	0.113323	4.11332		68.8697	0.161972	5.16197		93.4848	0.0292592	5.02926
3808.78	66.6388	0.176273	0.176273		89.8192	0.046631	1.04663		80.6115	0.0936032	2.0936		90.1004	0.0452733	3.04527		77.2226	0.112255	4.11226		68.9188	0.161662	5.16166		93.718	0.0281771	5.02818
3810.71	66.7488	0.175556	0.175556		89.7898	0.0467732	1.04677		80.6294	0.0935066	2.09351		89.8752	0.0463604	3.04636		77.3206	0.111705	4.1117		68.5746	0.163837	5.16384		93.7971	0.0278105	5.02781
3812.64	66.9065	0.174532	0.174532		89.7194	0.0471139	1.04711		80.5981	0.093675	2.09368		89.8049	0.0467	3.0467		77.4398	0.111036	4.11104		68.1638	0.166446	5.16645		93.8575	0.027531	5.02753
3814.57	66.9804	0.174053	0.174053		89.6214	0.0475883	1.04759		80.6085	0.0936194	2.09362		89.9558	0.045971	3.04597		77.5874	0.110209	4.11021		68.1247	0.166695	5.1667		94.0137	0.0268087	5.02681
3816.5	67.0608	0.173531	0.173531		89.5951	0.0477159	1.04772		80.5659	0.0938486	2.09385		89.6853	0.0472787	3.04728		77.4086	0.111211	4.11121		67.9422	0.167861	5.16786		93.9772	0.0269776	5.02698
3818.43	67.1841	0.172734	0.172734		89.5386	0.0479899	1.04799		80.5197	0.0940979	2.0941		89.4644	0.0483498	3.04835		77.2403	0.112156	4.11216		67.7801	0.168898	5.1689		93.915	0.0272653	5.02727
3820.36	67.2469	0.172328	0.172328		89.4474	0.0484322	1.04843		80.563	0.0938643	2.09386		89.4599	0.0483717	3.04837		77.199	0.112388	4.11239		67.7829	0.16888	5.16888		93.962	0.0270479	5.02705
3822.28	67.3886	0.171414	0.171414		89.4281	0.0485261	1.04853		80.5085	0.0941582	2.09416		89.4016	0.048655	3.04865		76.9797	0.113624	4.11362		67.6504	0.16973	5.16973		93.8751	0.0274496	5.02745
3824.21	67.6221	0.169911	0.169911		89.4162	0.048584	1.04858		80.4916	0.0942493	2.09425		89.6724	0.0473413	3.04734		76.7685	0.114817	4.11482		67.6738	0.169579	5.16958		93.797	0.0278108	5.02781
3826.14	67.7732	0.168942	0.168942		89.3406	0.048951	1.04895		80.5068	0.0941674	2.09417		90.0822	0.045361	3.04536		76.7993	0.114643	4.11464		67.7023	0.169396	5.1694		93.8754	0.0274483	5.02745
3828.07	67.7171	0.169302	0.169302		89.2253	0.049512	1.04951		80.4693	0.09437	2.09437		90.4425	0.0436272	3.04363		76.9804	0.11362	4.11362		67.7279	0.169232	5.16923		94.025	0.0267567	5.02676
3830	67.5566	0.170333	0.170333		89.1078	0.0500843	1.05008		80.5061	0.0941713	2.09417		90.863	0.0416127	3.04161		77.1599	0.112608	4.11261		67.9247	0.167972	5.16797		94.2723	0.0256161	5.02562
3831.93	67.4228	0.171193	0.171193		89.0844	0.0501982	1.0502		80.5309	0.0940376	2.09404		90.9316	0.0412852	3.04129		77.1082	0.112899	4.1129		67.9796	0.167621	5.16762		94.4473	0.0248103	5.02481
3833.86	67.202	0.172618	0.172618		89.0276	0.0504756	1.05048		80.6312	0.0934967	2.0935		91.0597	0.0406736	3.04067		77.1659	0.112574	4.11257		68.1529	0.166516	5.16652		94.662	0.0238245	5.02382
3835.78	67.0306	0.173727	0.173727		88.9988	0.050616	1.05062		80.6601	0.0933412	2.09334		90.8326	0.0417583	3.04176		77.145	0.112692	4.11269		68.0923	0.166902	5.1669		94.7015	0.0236431	5.02364
3837.71	66.9657	0.174147	0.174147		88.9956	0.0506316	1.05063		80.5991	0.0936698	2.09367		90.5358	0.0431798	3.04318		77.0306	0.113336	4.11334		67.6905	0.169472	5.16947		94.6305	0.023969	5.02397
3839.64	66.7395	0.175617	0.175617		89.0127	0.0505478	1.05055		80.6921	0.0931691	2.09317		91.0663	0.0406421	3.04064		77.3559	0.111507	4.11151		67.8974	0.168147	5.16815		94.8607	0.0229137	5.02291
3841.57	66.6389	0.176272	0.176272		89.2332	0.0494733	1.04947		80.6415	0.0934412	2.09344		90.9681	0.0411108	3.04111		77.5699	0.110307	4.11031		68.2234	0.166067	5.16607		94.971	0.0224092	5.02241
3843.5	66.6573	0.176152	0.176152		89.4063	0.0486319	1.04863		80.4819	0.0943017	2.0943		90.4805	0.0434452	3.04345		77.5571	0.110378	4.11038		68.3276	0.165404	5.1654		94.877	0.022839	5.02284
3845.43	66.707	0.175829	0.175829		89.5267	0.0480476	1.04805		80.3314	0.0951148	2.09511		89.9016	0.0462324	3.04623		77.4562	0.110944	4.11094		68.3089	0.165523	5.16552		94.7077	0.0236146	5.02361
3847.35	66.8197	0.175095	0.175095		89.6882	0.0472647	1.04726		80.1839	0.0959127	2.09591		89.4703	0.0483212	3.04832		77.2907	0.111873	4.11187		68.1955	0.166244	5.16624		94.5094	0.0245251	5.02453
3849.28	66.988	0.174003	0.174003		89.8394	0.0465332	1.04653		80.0453	0.0966639	2.09666		89.3816	0.0487516	3.04875		77.2053	0.112353	4.11235		68.2029	0.166197	5.1662		94.3771	0.0251335	5.02513
3851.21	67.1457	0.172982	0.172982		89.9038	0.0462221	1.04622		80.1462	0.096117	2.09612		89.4569	0.0483863	3.04839		77.3077	0.111777	4.11178		68.5258	0.164146	5.16415		94.4178	0.0249461	5.02495
3853.14	67.1582	0.172901	0.172901		89.9007	0.0462371	1.04624		80.2414	0.0956014	2.0956		89.1853	0.0497069	3.04971		77.3976	0.111273	4.11127		68.672	0.16322	5.16322		94.4938	0.0245967	5.0246
3855.07	67.0499	0.173602	0.173602		89.8612	0.0464277	1.04643		80.2711	0.0954409	2.09544		88.9843	0.0506869	3.05069		77.4085	0.111211	4.11121		68.7458	0.162754	5.16275		94.5983	0.0241164	5.02412
3857	66.9723	0.174105	0.174105		89.7406	0.0470112	1.04701		80.3993	0.0947479	2.09475		89.2189	0.0495434	3.04954		77.5595	0.110365	4.11036		69.0424	0.160884	5.16088		94.8456	0.0229826	5.02298
3858.93	67.0055	0.17389	0.17389		89.5856	0.0477619	1.04776		80.4946	0.0942334	2.09423		89.1989	0.0496406	3.04964		77.4449	0.111007	4.11101		68.95	0.161466	5.16147		94.9675	0.0224248	5.02242
3860.85	66.9444	0.174286	0.174286		89.3895	0.0487136	1.04871		80.6522	0.093384	2.09338		89.3858	0.0487314	3.04873		77.3253	0.111678	4.11168		68.7816	0.162528	5.16253		95.1277	0.0216932	5.02169
3862.78	66.8106	0.175154	0.175154		89.1746	0.049759	1.04976		80.7575	0.0928173	2.09282		89.5386	0.0479897	3.04799		77.2063	0.112347	4.11235		68.4466	0.164648	5.16465		95.2005	0.0213609	5.02136
3864.71	66.6603	0.176132	0.176132		89.0171	0.0505266	1.05053		80.7417	0.0929019	2.0929		89.9	0.0462402	3.04624		77.1901	0.112438	4.11244		68.1979	0.166229	5.16623		95.316	0.0208341	5.02083
3866.64	66.4885	0.177253	0.177253		88.9637	0.0507873	1.05079		80.7925	0.0926288	2.09263		90.6912	0.0424349	3.04243		77.4934	0.110735	4.11074		68.3852	0.165038	5.16504		95.6378	0.0193706	5.01937
3868.57	66.496	0.177205	0.177205		89.045	0.0503907	1.05039		80.6908	0.0931761	2.09318		90.5026	0.0433389	3.04334		77.4461	0.111	4.111		68.2893	0.165647	5.16565		95.6928	0.0191207	5.01912
3870.5	66.5201	0.177047	0.177047		89.0699	0.0502691	1.05027		80.4535	0.0944548	2.09445		90.197	0.0448081	3.04481		77.217	0.112287	4.11229		68.0181	0.167376	5.16738		95.6175	0.0194626	5.01946
3872.43	66.5323	0.176968	0.176968		89.0637	0.0502991	1.0503		80.3533	0.0949962	2.095		90.1403	0.0450812	3.04508		77.1486	0.112672	4.11267		67.8712	0.168314	5.16831		95.6587	0.0192756	5.01928
3874.35	66.6609	0.176129	0.176129		89.0932	0.0501552	1.05016		80.3136	0.0952109	2.09521		90.0408	0.0455606	3.04556		77.065	0.113143	4.11314		67.6662	0.169628	5.16963		95.5545	0.0197487	5.01975
3876.28	66.8053	0.175189	0.175189		89.1709	0.049777	1.04978		80.325	0.0951495	2.09515		89.964	0.0459312	3.04593		77.0476	0.113241	4.11324		67.6217	0.169914	5.16991		95.4606	0.0201757	5.02018
3878.21	66.8534	0.174876	0.174876		89.2998	0.0491497	1.04915		80.5088	0.0941565	2.09416		90.0502	0.0455152	3.04552		77.1308	0.112772	4.11277		67.938	0.167887	5.16789		95.5295	0.0198627	5.01986
3880.14	66.8859	0.174666	0.174666		89.42	0.0485655	1.04857		80.5695	0.0938293	2.09383		89.9707	0.0458991	3.0459		77.055	0.113199	4.1132		68.086	0.166942	5.16694		95.5272	0.0198732	5.01987
3882.07	66.968	0.174133	0.174133		89.4645	0.0483494	1.04835		80.6206	0.0935541	2.09355		90.1082	0.0452357	3.04524		77.0163	0.113417	4.11342		68.1601	0.16647	5.16647		95.5575	0.0197354	5.01974
3884	67.0692	0.173477	0.173477		89.4069	0.0486288	1.04863		80.811	0.0925297	2.09253		90.3685	0.043983	3.04398		77.0828	0.113042	4.11304		68.1249	0.166694	5.16669		95.6228	0.0194386	5.01944
3885.92	67.1574	0.172906	0.172906		89.3238	0.0490331	1.04903		81.057	0.0912094	2.09121		90.4664	0.0435125	3.04351		77.0319	0.11333	4.11333		67.8232	0.168622	5.16862		95.6536	0.0192985	5.0193
3887.85	67.1148	0.173181	0.173181		89.2966	0.0491653	1.04917		81.199	0.0904493	2.09045		90.673	0.042522	3.04252		77.064	0.113149	4.11315		67.8702	0.168321	5.16832		95.79	0.0186798	5.01868
3889.78	67.1452	0.172985	0.172985		89.3294	0.0490054	1.04901		81.084	0.0910648	2.09106		90.8651	0.041603	3.0416		77.095	0.112974	4.11297		68.0219	0.167351	5.16735		95.8592	0.0183662	5.01837
3891.71	67.175	0.172792	0.172792		89.3013	0.0491422	1.04914		80.9271	0.0919058	2.09191		91.1118	0.0404256	3.04043		77.1786	0.112503	4.1125		68.252	0.165884	5.16588		95.9922	0.017764	5.01776
3893.64	67.1781	0.172772	0.172772		89.2195	0.0495401	1.04954		80.8017	0.0925797	2.09258		91.1939	0.0400342	3.04003		77.2394	0.112161	4.11216		68.4499	0.164627	5.16463		96.1765	0.0169311	5.01693
3895.57	67.1769	0.17278	0.17278		89.1604	0.049828	1.04983		80.6178	0.0935693	2.09357		90.9776	0.0410656	3.04107		77.1678	0.112564	4.11256		68.5273	0.164137	5.16414		96.3053	0.01635	5.01635
3897.49	67.0817	0.173396	0.173396		89.1323	0.0499651	1.04997		80.4379	0.0945394	2.09454		90.7903	0.0419604	3.04196		77.1459	0.112687	4.11269		68.6723	0.163218	5.16322		96.4514	0.0156916	5.01569
3899.42	66.9951	0.173957	0.173957		89.0792	0.0502235	1.05022		80.3845	0.0948279	2.09483		90.6846	0.0424665	3.04247		77.1604	0.112605	4.11261		68.8304	0.16222	5.16222		96.5573	0.0152147	5.01521
3901.35	67.0495	0.173604	0.173604		89.0726	0.0502556	1.05026		80.353	0.0949976	2.095		90.3499	0.0440723	3.04407		77.0196	0.113399	4.1134		68.7782	0.162549	5.16255		96.4434	0.0157273	5.01573
3903.28	67.0419	0.173653	0.173653		89.0977	0.0501337	1.05013		80.4036	0.0947244	2.09472		90.2672	0.04447	3.04447		77.0515	0.113219	4.11322		68.747	0.162746	5.16275		96.4798	0.0155635	5.01556
3905.21	66.9965	0.173948	0.173948		89.1611	0.0498246	1.04982		80.3757	0.0948754	2.09488		90.3641	0.0440042	3.044		77.1673	0.112567	4.11257		68.6936	0.163084	5.16308		96.599	0.0150272	5.01503
3907.14	67.0696	0.173474	0.173474		89.1842	0.0497121	1.04971		80.2324	0.0956504	2.09565		90.2654	0.0444788	3.04448		77.1038	0.112924	4.11292		68.3743	0.165107	5.16511		96.5537	0.015231	5.01523
3909.07	67.2028	0.172613	0.172613		89.1938	0.0496654	1.04967		80.1581	0.0960524	2.09605		90.1452	0.0450576	3.04506		77.012	0.113442	4.11344		67.9057	0.168094	5.16809		96.4783	0.0155702	5.01557
3910.99	67.2271	0.172455	0.172455		89.222	0.049528	1.04953		80.2923	0.0953262	2.09533		90.3113	0.0442578	3.04426		77.0611	0.113165	4.11316		67.5611	0.170303	5.1703		96.5471	0.0152608	5.01526
3912.92	67.2186	0.172511	0.172511		89.2464	0.0494091	1.04941		80.3849	0.0948255	2.09483		90.5297	0.0432091	3.04321		77.1054	0.112915	4.11292		67.427	0.171166	5.17117		96.6342	0.0148694	5.01487
3914.85	67.228	0.17245	0.17245		89.3206	0.0490482	1.04905		80.2897	0.0953404	2.09534		90.6592	0.0425881	3.04259		77.1306	0.112773	4.11277		67.4703	0.170887	5.17089		96.7106	0.0145258	5.01453
3916.78	67.1813	0.172752	0.172752		89.3709	0.0488036	1.0488		80.2128	0.0957562	2.09576		90.9211	0.0413353	3.04134		77.2201	0.11227	4.11227		67.6259	0.169887	5.16989		96.8546	0.0138797	5.01388
3918.71	67.0702	0.17347	0.17347		89.3283	0.0490108	1.04901		80.1826	0.0959199	2.09592		91.025	0.0408394	3.04084		77.2618	0.112035	4.11204		67.7191	0.169289	5.16929		96.9646	0.0133866	5.01339
3920.64	67.017	0.173815	0.173815		89.2925	0.049185	1.04919		80.1214	0.0962513	2.09625		90.8162	0.0418364	3.04184		77.1865	0.112459	4.11246		67.7415	0.169145	5.16914		96.978	0.0133269	5.01333
3922.57	66.9913	0.173982	0.173982		89.2707	0.049291	1.04929		80.0723	0.0965177	2.09652		90.5991	0.0428761	3.04288		77.0565	0.113191	4.11319		67.737	0.169174	5.16917		96.9818	0.0133099	5.01331
3924.49	66.9518	0.174238	0.174238		89.2494	0.0493948	1.04939		80.0815	0.0964678	2.09647		90.4253	0.0437098	3.04371		76.9146	0.113991	4.11399		67.706	0.169373	5.16937		96.9757	0.0133369	5.01334
3926.42	66.9912	0.173982	0.173982		89.2422	0.0494295	1.04943		80.1476	0.0961095	2.09611		90.2351	0.0446245	3.04462		76.7601	0.114864	4.11486		67.6587	0.169676	5.16968		96.9223	0.0135764	5.01358
3928.35	67.0633	0.173515	0.173515		89.2379	0.0494504	1.04945		80.2782	0.0954025	2.0954		90.1771	0.0449038	3.0449		76.7087	0.115156	4.11516		67.6849	0.169508	5.16951		96.9746	0.0133418	5.01334
3930.28	67.0979	0.173291	0.173291		89.2055	0.0496083	1.04961		80.3556	0.0949836	2.09498		90.2414	0.0445941	3.04459		76.7833	0.114733	4.11473		67.7097	0.169349	5.16935		97.1402	0.0126008	5.0126
3932.21	67.182	0.172747	0.172747		89.1824	0.049721	1.04972		80.2488	0.0955615	2.09556		90.1886	0.0448481	3.04485		76.7769	0.114769	4.11477		67.6706	0.1696	5.1696		97.2191	0.0122484	5.01225
3934.14	67.3025	0.171969	0.171969		89.1478	0.0498893	1.04989		80.1196	0.096261	2.09626		90.1375	0.0450943	3.04509		76.7644	0.11484	4.11484		67.7467	0.169112	5.16911		97.2692	0.0120245	5.01202
3936.07	67.3794	0.171473	0.171473		89.1209	0.0500204	1.05002		80.123	0.0962429	2.09624		90.164	0.044967	3.04497		76.7942	0.114672	4.11467		67.8993	0.168134	5.16813		97.3842	0.0115115	5.01151
3937.99	67.3555	0.171627	0.171627		89.1188	0.0500309	1.05003		80.2135	0.0957525	2.09575		90.3008	0.0443084	3.04431		76.8345	0.114444	4.11444		68.0127	0.16741	5.16741		97.5349	0.0108398	5.01084
3939.92	67.3361	0.171752	0.171752		89.1201	0.0500243	1.05002		80.2578	0.0955127	2.09551		90.2598	0.0445057	3.04451		76.7999	0.114639	4.11464		67.9729	0.167664	5.16766		97.6083	0.0105132	5.01051
3941.85	67.2794	0.172118	0.172118		89.1453	0.0499016	1.0499		80.3149	0.0952038	2.0952		90.2532	0.0445373	3.04454		76.8073	0.114597	4.1146		67.8957	0.168158	5.16816		97.726	0.00998997	5.00999
3943.78	67.1215	0.173138	0.173138		89.1703	0.0497796	1.04978		80.4719	0.0943559	2.09436		90.4202	0.0437345	3.04373		76.8244	0.114501	4.1145		67.8948	0.168163	5.16816		97.8571	0.00940775	5.00941
3945.71	67.0053	0.173891	0.173891		89.2022	0.0496245	1.04962		80.6431	0.0934326	2.09343		90.5425	0.0431475	3.04315		76.8213	0.114519	4.11452		67.9121	0.168053	5.16805		97.94	0.00903977	5.00904
3947.64	66.9718	0.174108	0.174108		89.2341	0.0494691	1.04947		80.7474	0.0928716	2.09287		90.5116	0.0432956	3.0433		76.8376	0.114426	4.11443		67.9111	0.168059	5.16806		97.9996	0.00877556	5.00878
3949.57	66.9861	0.174015	0.174015		89.2519	0.0493825	1.04938		80.7501	0.0928569	2.09286		90.5131	0.0432886	3.04329		76.8358	0.114436	4.11444		67.9043	0.168102	5.1681		98.0494	0.00855497	5.00855
3951.49	67.0268	0.173751	0.173751		89.2942	0.0491767	1.04918		80.7412	0.0929048	2.0929		90.506	0.0433225	3.04332		76.7844	0.114727	4.11473		67.9029	0.168112	5.16811		98.0791	0.00842348	5.00842
3953.42	67.1233	0.173126	0.173126		89.3602	0.0488561	1.04886		80.7943	0.0926194	2.09262		90.4735	0.0434785	3.04348		76.7323	0.115022	4.11502		67.9309	0.167932	5.16793		98.0884	0.00838248	5.00838
3955.35	67.2305	0.172434	0.172434		89.3821	0.0487494	1.04875		80.8054	0.0925596	2.09256		90.5062	0.0433219	3.04332		76.736	0.115001	4.115		67.9942	0.167528	5.16753		98.1695	0.0080236	5.00802
3957.28	67.3584	0.171608	0.171608		89.3901	0.0487107	1.04871		80.6854	0.0932051	2.09321		90.5696	0.0430174	3.04302		76.7306	0.115032	4.11503		67.9684	0.167693	5.16769		98.2866	0.00750547	5.00751
3959.21	67.4994	0.1707	0.1707		89.4099	0.0486145	1.04861		80.5167	0.0941141	2.09411		90.626	0.042747	3.04275		76.7311	0.115028	4.11503		67.9441	0.167848	5.16785		98.3542	0.00720727	5.00721
3961.14	67.5276	0.170519	0.170519		89.3882	0.0487196	1.04872		80.4122	0.0946783	2.09468		90.7171	0.0423108	3.04231		76.7836	0.114731	4.11473		68.0122	0.167413	5.16741		98.4729	0.00668314	5.00668
3963.06	67.4767	0.170846	0.170846		89.3346	0.0489803	1.04898		80.3707	0.094902	2.0949		90.7969	0.0419292	3.04193		76.8041	0.114615	4.11462		68.0119	0.167415	5.16742		98.6248	0.00601364	5.00601
3964.99	67.3739	0.171509	0.171509		89.3076	0.0491116	1.04911		80.2567	0.0955188	2.09552		90.8584	0.0416349	3.04163		76.7545	0.114896	4.1149		67.9209	0.167997	5.168		98.7204	0.00559296	5.00559
3966.92	67.201	0.172624	0.172624		89.3243	0.0490302	1.04903		80.1693	0.095992	2.09599		90.8208	0.0418146	3.04181		76.7231	0.115074	4.11507		67.8554	0.168416	5.16842		98.7715	0.00536831	5.00537
3968.85	67.0347	0.1737	0.1737		89.3189	0.0490566	1.04906		80.1551	0.0960688	2.09607		90.7906	0.0419591	3.04196		76.7193	0.115095	4.1151		67.7865	0.168857	5.16886		98.8296	0.00511279	5.00511
3970.78	66.9248	0.174413	0.174413		89.2747	0.0492716	1.04927		80.1908	0.0958755	2.09588		90.7708	0.0420538	3.04205		76.699	0.11521	4.11521		67.6902	0.169474	5.16947		98.877	0.00490481	5.0049
3972.71	66.8849	0.174672	0.174672		89.2353	0.0494633	1.04946		80.1887	0.0958868	2.09589		90.7089	0.0423502	3.04235		76.6993	0.115208	4.11521		67.6298	0.169862	5.16986		98.9536	0.00456836	5.00457
3974.64	66.921	0.174438	0.174438		89.2144	0.0495648	1.04956		80.0959	0.0963898	2.09639		90.6989	0.0423978	3.0424		76.7151	0.115119	4.11512		67.6303	0.169859	5.16986		99.0502	0.00414447	5.00414
3976.56	66.992	0.173977	0.173977		89.2173	0.0495512	1.04955		79.9803	0.0970169	2.09702		90.6774	0.0425008	3.0425		76.6944	0.115237	4.11524		67.6479	0.169745	5.16975		99.1145	0.00386259	5.00386
3978.49	67.0404	0.173663	0.173663		89.2199	0.049538	1.04954		79.9582	0.0971372	2.09714		90.5435	0.0431428	3.04314		76.6229	0.115642	4.11564		67.6214	0.169916	5.16992		99.1283	0.00380239	5.0038
3980.42	67.1329	0.173064	0.173064		89.2098	0.0495873	1.04959		80.0422	0.0966807	2.09668		90.4989	0.0433565	3.04336		76.6	0.115771	4.11577		67.5397	0.170441	5.17044		99.1368	0.00376506	5.00377
3982.35	67.2821	0.1721	0.1721		89.1863	0.0497017	1.0497		80.0892	0.0964258	2.09643		90.5495	0.043114	3.04311		76.6405	0.115542	4.11554		67.4656	0.170918	5.17092		99.1633	0.00364925	5.00365
3984.28	67.4212	0.171203	0.171203		89.1894	0.0496869	1.04969		80.1048	0.0963415	2.09634		90.6545	0.0426108	3.04261		76.6621	0.11542	4.11542		67.3959	0.171367	5.17137		99.2138	0.00342778	5.00343
3986.21	67.4867	0.170782	0.170782		89.175	0.0497567	1.04976		80.1324	0.096192	2.09619		90.7601	0.042105	3.0421		76.6588	0.115438	4.11544		67.3586	0.171607	5.17161		99.2425	0.00330222	5.0033
3988.14	67.4829	0.170806	0.170806		89.1207	0.0500216	1.05002		80.1899	0.0958805	2.09588		90.8199	0.0418191	3.04182		76.6667	0.115393	4.11539		67.273	0.172159	5.17216		99.2771	0.00315101	5.00315
3990.06	67.3064	0.171944	0.171944		89.1187	0.050031	1.05003		80.1379	0.0961619	2.09616		90.9029	0.0414225	3.04142		76.6171	0.115674	4.11567		67.3813	0.17146	5.17146		99.1789	0.00358063	5.00358
3991.99	67.222	0.172489	0.172489		88.9816	0.0506999	1.0507		80.1885	0.0958882	2.09589		90.9487	0.0412037	3.0412		76.6332	0.115583	4.11558		67.394	0.171379	5.17138		99.1216	0.0038317	5.00383
3993.92	67.2065	0.172589	0.172589		88.9142	0.0510287	1.05103		79.996	0.0969316	2.09693		91.025	0.0408391	3.04084		76.4874	0.11641	4.11641		67.4597	0.170956	5.17096		99.2065	0.00346	5.00346
3995.85	67.0245	0.173766	0.173766		88.9429	0.0508886	1.05089		79.7407	0.0983197	2.09832		90.8766	0.0415481	3.04155		76.2204	0.117929	4.11793		67.4928	0.170743	5.17074		99.3799	0.00270153	5.0027
3997.78	66.8639	0.174808	0.174808		88.9342	0.050931	1.05093		79.6497	0.0988159	2.09882		90.9486	0.041204	3.0412		76.2841	0.117566	4.11757		67.4022	0.171326	5.17133		99.686	0.00136566	5.00137
3999.71	66.8163	0.175117	0.175117		88.9263	0.0509696	1.05097		79.5247	0.0994981	2.0995		91.0322	0.0408052	3.04081		76.5371	0.116128	4.11613		67.4813	0.170816	5.17082		100	0	5
4001.63	0	#NUM!	#NUM!		0	#NUM!	#NUM!		0	#NUM!	#NUM!		0	#NUM!	#NUM!		0	#NUM!	#NUM!		0	#NUM!	#NUM!		0	#NUM!	#NUM!
